# Supplementary material for: Sustained store-operated calcium entry utilizing activated chromatin state leads to instability in iTregs
Source: eLife journal article supplement (doi:10.7554/elife.88874), 2023-07-04
Supplement: fig2-data2 [file 23min iTreg.xls]

## Sheet: Intensity Mean
Intensity Mean
Time [s]	Intensity Mean::1000024997	Intensity Mean::1000024998	Intensity Mean::1000024999	Intensity Mean::1000025000	Intensity Mean::1000025001	Intensity Mean::1000025002	Intensity Mean::1000025003	Intensity Mean::1000025004	Intensity Mean::1000025005	Intensity Mean::1000025006	Intensity Mean::1000025007	Intensity Mean::1000025008	Intensity Mean::1000025009	Intensity Mean::1000025010	Intensity Mean::1000025011	Intensity Mean::1000025012	Intensity Mean::1000025013	Intensity Mean::1000025014	Intensity Mean::1000025015	Intensity Mean::1000025016	Intensity Mean::1000025017	Intensity Mean::1000025018	Intensity Mean::1000025019	Intensity Mean::1000025020	Intensity Mean::1000025021	Intensity Mean::1000025022	Intensity Mean::1000025023	Intensity Mean::1000025024	Intensity Mean::1000025025	Intensity Mean::1000025026	Intensity Mean::1000025027	Intensity Mean::1000025028	Intensity Mean::1000025029	Intensity Mean::1000025030	Intensity Mean::1000025031	Intensity Mean::1000025032	Intensity Mean::1000025033	Intensity Mean::1000025034	Intensity Mean::1000025035	Intensity Mean::1000025036	Intensity Mean::1000025037	Intensity Mean::1000025038	Intensity Mean::1000025039	Intensity Mean::1000025040	Intensity Mean::1000025041	Intensity Mean::1000025042	Intensity Mean::1000025043	Intensity Mean::1000025044	Intensity Mean::1000025045
0	299.117	354.659	207.318	344.19	316.685	356.839	263.579	301.524	323.386	230.56	349.864	340.727	471.246	318.945	310.474	570.24	272.077	464.581	250.514	191.095	305.511	339.82	367.015	341.835	306.815	257.099	368.75	451.623	180.668	314.277	250.351	414.487	275.724	247.798	181.079	395.097	345.16	246.98	304.721	486.208	225.372	385.216	386.681	324.587	302.176	330.407	299.171	361.318	226.218
8.295	284.185	353.343	205.82	339.21	322.71	349.666	264.203	302.925	317.83	229.742	348.014	340.434	468.05	313.905	313.809	555.503	268.526	470.948	252.363	187.993	308.83	321.212	371.651	336.249	305.22	245.974	362.832	445.306	179.544	313.575	248.525	401.161	275.421	246.614	182.195	391.265	343.788	245.104	311.73	482.439	222.53	382.352	389.151	314.245	280.792	328.437	291.255	346.49	231.104
16.58	267.383	342.168	208.133	325.648	324.289	363.004	262.205	296.745	317.221	223.263	339.657	333.051	454.36	304.668	306.716	545.451	261.421	456.943	242.004	186.308	303.181	311.36	369.27	342.382	301.054	226.679	356.798	421.603	175.676	310.153	242.693	389.94	267.969	245.173	185.326	384.861	332.356	238.523	308.734	471.161	217.954	371.704	380.628	294.574	289.839	319.558	285.157	333.73	224.105
24.712	262.649	344.748	209.643	323.005	321.153	349.675	267.938	300.041	326.439	215.655	335.136	325.645	451.514	304.161	301.164	559.357	258.389	452.554	238.046	183.655	294.647	315.159	364.211	336.834	293.292	211.769	356.064	424.419	177.14	306.645	237.635	385.561	265.91	247.229	185.097	382.115	319.806	235.649	303.966	465.313	215.832	368.586	380.391	284.482	296.882	315.47	280.16	334.798	225.668
32.829	267.564	342.779	209.459	318.367	313.631	340.468	268.274	299.362	314.977	215.27	341.146	322.951	447.407	294.545	295.776	541.88	252.223	451.662	222.57	182.489	295.55	308.298	359.981	330.944	293.319	195.408	353.326	417.398	178.738	307.823	233.494	377.384	260.57	245.865	186.354	380.013	324.962	233.624	303.035	456.514	214.439	356.583	372.219	272.81	289.571	307.447	271.842	331.88	212.916
41.121	256.648	339.07	212.391	317.556	329.238	342.074	274.723	301.412	329.698	212.502	340.328	326.921	454.613	292.237	294.913	551.865	253.043	457.644	216.639	182.364	293.629	314.042	370.248	332.151	294.655	193.095	361.715	420.985	179.565	309.789	238.321	384.655	260.622	254.09	187.736	382.384	323.44	234.629	296.777	460.851	216.1	363.837	374.444	262.464	295.17	306.944	266.229	343.118	210.394
49.416	272.132	333.639	206.222	305.581	320.514	352.119	276.445	290.657	331.208	221.306	337.419	330.561	453.075	290.262	288.285	564.002	251.745	452.396	202.608	184.001	289.101	297.548	367.374	321.898	291.341	188.411	356.299	422.648	177.409	309.613	242.777	385.855	261.62	258.639	190.004	380.18	324.335	235.748	296.728	459.553	214.278	365.694	378.346	261.826	298.025	309.246	266.772	341.616	210.223
58.34	291.751	324.19	206.207	301.86	327.604	344.046	277.035	287.082	327.332	223.398	333.804	331.18	455.915	297.398	283.491	556.078	253.177	454.031	199.183	182.246	273.247	308.515	367.6	321.355	289.731	192.383	350.454	422.858	179.441	309.96	242.265	382.542	258.055	266.176	183.614	382.511	330.802	236.785	297.639	457.331	216.251	365.33	383.557	253.351	296.582	307.593	272.946	342.474	211.908
66.387	288.753	326.736	207.286	305.362	328.834	349.223	280.816	286.225	333.228	229.706	324.496	334.344	465.089	305.131	294.024	558.416	257.228	450.399	201.755	184.854	282.989	308.114	366.232	323.475	287.462	195.865	346.396	415.901	176.853	313.218	249.233	380.357	262.129	273.782	187.073	386.505	328.191	240.786	301.597	462.229	220.296	374.793	394.236	259.595	320.016	309.193	275.431	348.996	209.672
74.544	291.891	327.108	202.965	306.939	312.447	348.046	277.165	285.074	327.621	232.837	333.07	333.359	464.28	302.58	292.052	552.498	253.709	458.235	202.964	183.947	297.558	297.272	368.189	329.171	288.155	199.731	336.9	418.939	183.166	313.2	239.066	389.299	260.045	275.133	182.186	387.473	319.177	237.037	296.343	465.268	220.634	375.883	395.233	270.201	315.699	306.807	261.015	345.521	200.659
82.486	301.243	314.768	202.432	306.46	323.096	345.423	264.198	290.801	326.056	224.879	327.121	334.78	460.699	296.974	295.935	546.385	252.532	460.621	199.323	184.211	296.075	314.179	361.997	334.116	295.731	203.24	328.22	406.242	183.403	316.366	238.18	387.735	259.317	274.769	184.958	383.958	319.534	238.464	293.266	462.43	219.495	368.069	385.678	275.331	307.192	303.737	258.569	342.981	212.377
90.713	303.288	314.081	204.153	307.054	317.188	346.311	262.372	301.569	327.799	223.014	321.956	334.996	465.416	300.695	291.157	524.375	257.443	466.759	198.811	187.502	295.536	327.152	361.138	334.051	298.243	211.252	334.891	405.971	184.168	311.274	239.991	389.832	262.636	277.272	187.649	381.374	324.419	242.657	286.537	463.733	219.737	362.925	390.193	284.772	305.175	303.048	258.197	336.972	213.609
98.485	285.504	314.727	202.665	301.569	316.793	345.888	256.252	310.481	321.685	219.363	329.884	330.905	460.465	298.241	285.211	530.774	261.477	465.565	197.228	186.897	290.759	327.424	354.026	333.559	299.234	212.379	337.83	400.346	179.123	312.725	242.006	386.896	258.608	274.955	185.415	380.271	320.338	235.335	286.061	461.529	220.89	358.739	384.607	280.944	299.852	297.622	260.598	332.204	208.41
106.508	277.294	298.726	200.4	294.866	314.63	332.72	248.598	313.831	311.592	215.491	325.054	321.171	455.899	293.541	277.048	529.209	257.022	440.159	195.662	182.429	276.853	331.441	341.22	332.684	300.004	205.837	335.502	382.525	173.446	314.255	226.954	381.52	253.151	269.987	183.295	380.257	309.005	229.399	281.609	455.307	216.401	355.005	368.815	265.23	294.078	296.678	265.074	329.288	204.495
114.556	284.078	298.327	203.595	294.542	316.203	337.114	242.132	314.761	309.087	218.449	316.989	315.309	460.293	290.707	277.497	520.228	257.54	441.278	194.726	182.214	286.835	335.704	332.212	325.48	301.52	195.589	336.613	380.647	171.975	312.437	231.734	380.442	253.065	269.696	183.849	382.636	309.737	232.377	279.631	454.998	214.976	355.668	373.214	275.708	282.82	294.12	263.506	323.825	208.282
122.667	253.827	294.202	205.126	290.651	301.399	320.253	233.372	308.851	311.107	217.408	311.831	310.154	453.55	295.015	275.456	509.372	254.11	425.726	189.95	181.549	277.242	326.72	319.333	319.293	289.719	189.806	331.168	378.057	176.867	312.212	236.988	370.77	248.816	263.444	182.126	379.525	311.996	224.648	276.408	441.47	213.475	350.904	358.583	256.11	285.666	288.124	262.793	313.424	198.815
130.423	275.52	293.015	208.606	291.058	296.162	322.006	232.275	299.237	313.528	224.04	317.961	308.791	452.138	291.073	282.486	525.391	249.495	423.909	193.545	182.123	269.509	334.34	298.333	323.18	284.902	188.915	331.892	378.286	177.023	308.514	233.926	369.664	247.385	256.201	181.67	381.597	313.223	221.057	262.822	436.883	213.017	345.33	362.537	264.394	287.061	290.075	260.707	316.334	209.416
138.626	260.056	292.474	210.744	296.592	303.856	328.352	229.579	288.089	309.69	216.704	313.374	305.384	448.966	282.526	283.625	511.682	248.858	405.993	193.501	180.962	281.575	333.212	285.009	330.6	285.472	187.816	322.703	371.98	173.304	310.927	228.372	367.972	239.027	252.527	178.552	380.33	320.585	222.609	262.627	435.293	213.636	345.045	340.237	261.016	258.804	288.783	257.158	323.264	210.657
146.74	281.851	289.025	204.706	294.832	292.671	331.245	226.741	277.902	305.192	218.739	313.441	306.928	441.886	277.927	283.79	505.778	239.473	398.318	200.846	177.545	288	316.026	280.111	335.53	284.094	190.772	317.657	370.21	174.226	312.087	227.751	364.236	236.142	248.557	180.218	376.369	315.977	221.874	260.631	434.064	209.56	337.527	343.555	267.96	274.145	284.262	262.18	333.92	216.569
154.661	274.777	287.777	207.505	296.624	302.055	330.537	222.826	276.846	299.306	214.088	316.368	310.401	446.874	273.61	285.735	491.838	234.285	394.476	199.281	178.47	289.921	317.949	281.334	333.352	283.28	189.288	308.761	370.708	175.718	305.271	230.177	368.348	236.329	246.213	182.286	378.844	330.889	226.77	256.272	428.465	212.428	333.521	334.628	276.559	301.325	284.951	261.463	334.745	221.44
162.445	283.134	288.749	207.575	293.048	312.751	331.801	220.304	283.385	294.635	216.675	316.366	306.84	447.976	266.042	278.849	487.551	235.169	399.965	196.66	180.605	288.474	319.763	280.787	335.216	283.969	185.424	294.101	369.788	176.583	315.098	234.426	369.015	234.414	241.259	185.41	377.638	323.331	231.151	246.733	422.358	208.09	327.409	343.945	270.196	313.256	282.805	261.492	324.682	219.787
170.416	271.029	300.75	206.938	290.998	311.948	344.266	217.876	293.441	292.749	216.723	327.168	308.457	457.442	269.053	277.141	483.205	239.262	413.004	198.902	179.582	294.202	318.212	277.222	344.808	287.236	186.882	285.11	360.929	176.684	316.995	233.433	377.768	235.163	239.176	185.538	381.686	329.405	235.311	241.461	425.389	209.208	334.329	356.495	270.435	304.492	280.401	262.601	321.026	220.426
178.716	278.072	293.303	202.425	292.731	309.017	349.669	222.135	300.075	287.452	223.133	333.357	296.303	452.112	270.73	275.905	481.188	233.292	414.033	198.099	179.356	292.561	320.584	271.81	344.3	284.181	187.329	289.117	350.946	176.453	314.88	231.725	371.602	230.835	232.967	177.695	379.322	323.169	236.527	243.456	415.541	210.322	339.152	347.58	262.904	299.085	279.871	264.824	318.203	218.593
186.782	273.892	284.239	200.863	296.394	295.734	348.831	222.262	301.561	280.362	217.305	331.313	310.928	449.875	272.481	274.804	477.122	228.418	410.981	195.853	179.109	283.76	321.902	272.911	333.083	281.271	188.159	285.283	351.156	177.955	310.861	229.395	371.244	224.213	225.157	174.29	376.94	323.005	233.842	244.57	407.391	209.371	330.989	345.46	257.428	281.999	277.316	263.773	313.633	217.821
194.64	272.106	283.386	197.76	305.415	303.454	350.325	220.716	301.342	281.7	216.194	333.708	321.83	452.129	278.506	285.039	488.844	234.363	413.407	191.028	177.714	293.857	320.148	273.347	339.294	282.506	184.801	287.612	352.186	181.283	314.627	237.984	375.342	226.271	223.223	182.223	378.479	326.9	232.64	252.831	408.162	209.4	338.07	357.628	270.156	288.568	280.01	262.412	320.965	212.07
202.503	260.11	295.562	195.059	301.077	313.984	347.676	218.158	291.516	283.781	213.548	326.263	315.052	452.623	277.877	285.222	488.196	242.224	409.745	190.89	181.041	295.188	326.183	280.068	340.384	277.234	184.904	290.137	352.159	176.427	318.766	232.815	371.129	226.065	224.269	181.694	378.493	322.671	230.55	257.366	400.511	213.172	339.209	357.896	259.293	291.024	284.106	265.305	322.011	211.745
211.363	256.016	290.201	201.096	286.461	300.719	346.27	205.662	278.883	283.803	212.893	329.734	316.787	454.267	280.54	286.129	492.316	242.444	405.106	192.131	179.724	291.488	330.203	282.663	330.704	286.804	184.022	290.886	347.518	176.55	321.447	239.301	370.042	221.017	222.629	177.869	379.721	332.571	225.177	257.59	396.565	210.451	353.265	359.859	252.953	295.228	282.871	262.193	314.414	217.394
219.435	281.72	289.246	205.019	285.64	310.666	351.269	222.434	277.332	296.26	221.165	327.444	309.812	452.633	279.347	287.231	495.102	242.81	403.951	192.63	182.594	301.529	313.117	282.101	335.409	295.464	185.033	290.961	342.787	179.271	317.902	237.869	365.124	220.778	226.616	179.207	381.435	321.68	222.709	270.42	389.883	206.905	340.332	365.451	257.693	287.452	282.129	261.675	318.134	223.361
227.398	276.153	287.214	206.265	290.501	311.057	355.579	217.988	282.58	303.647	222.069	326.965	313.518	455.206	288.311	279.99	514.032	240.096	398.826	196.342	181.176	296.723	320.917	285.184	322.099	306.417	184.697	293.524	338.442	174.742	317.365	231.67	363.211	219.441	234.938	179.653	380.026	332.267	229.249	267.43	388.901	208.709	337.543	364.999	269.873	283.224	284.173	266.207	318.886	224.678
235.348	253.85	292.041	202.729	294.44	301.382	351.284	211.336	290.011	296.318	217.235	324.554	320.474	450.425	285.226	278.454	490.735	239.578	396.834	198.955	180.701	301.391	317.172	284.401	309.258	304.989	184.057	294.462	337.208	176.377	316.371	232.327	370.851	221.861	238.876	181.504	376.189	326.966	224.886	265.089	387.932	208.668	335.509	355.695	265.714	290.111	281.668	263.874	320.268	220.276
243.748	247.293	290.167	199.619	294.679	306.94	354.613	209.133	294.632	293.7	220.621	327.349	317.202	449.903	281.406	285.639	488.371	232.809	394.505	193.852	176.656	302.294	328.012	280.114	296.235	293.978	182.299	294.093	324.329	179.162	323.142	227.866	371.013	223.218	242.911	179.554	370.448	329.566	225.206	267.123	382.376	211.506	335.96	352.806	270.082	286.009	278.385	258.506	326.293	221.136
252.108	277.132	285.011	194.781	289.144	306.158	346.165	211.232	291.879	289.177	216.94	326.769	314.984	453.24	273.779	285.355	496.848	233.834	391.155	190.041	178.861	305.601	309.517	277.444	299.949	294.654	182.7	293.378	323.755	179.197	321.373	239.449	371.486	230.702	237.222	178.041	371.745	322.86	230.658	262.707	383.552	209.492	338.998	348.808	279.198	267.721	279.853	258.667	325.213	205.683
260.239	265.36	279.032	202.781	286.895	302.162	336.1	204.92	292.583	292.676	216.681	332.593	307.899	455.735	275.53	285.895	502.235	233.317	398.748	191.847	183.018	295.702	329.92	277.248	311.696	291.982	183.176	295.231	322.644	182.894	325.38	238.829	374.148	236.519	235.568	181.29	372.395	337.194	231.435	264.055	381.06	205.603	335.405	344.532	279.766	278.024	280.222	260.617	331.631	218.313
268.517	260.354	282.455	203.493	280.198	311.097	343.822	209.054	292.004	300.89	217.703	326.131	305.283	454.598	278.034	288.967	502.791	235.303	405.554	190.85	178.455	280.214	326.494	274.837	313.985	287.192	182.789	297.727	310.423	179.768	330.816	234.17	362.394	238.837	231.765	185.011	371.925	338.876	229.51	267.95	381.17	209.482	333.597	352.504	276.188	286.149	281.981	259.883	335.086	217.48
276.525	233.194	278.566	204.911	272.574	314.985	339.069	208.794	285.52	307.259	217.591	317.735	295.175	452.961	283.752	285.084	503.512	230.308	408.111	187.42	181.981	280.814	341.458	278.389	303.111	292.833	180.603	299.858	311.759	173.422	327.114	233.876	364.672	237.637	224.425	183.789	371.108	331.247	227.047	268.52	377.834	207.844	332.729	353.198	267.025	290.472	285.029	259.725	337.923	209.972
284.633	253.115	284.306	205.986	278.342	315.653	357.423	214.147	281.231	311.253	212.919	319.162	306.74	456.574	280.409	291.496	504.121	231.975	418.248	191.232	181.948	297.353	338.546	280.206	302.064	297.321	182.241	295.687	309.896	176.335	323.45	231.815	365.429	238.896	219.922	184.775	375.683	338.025	227.537	274.107	377.234	209.881	338.994	357.078	266.73	289.626	289.091	262.968	337.93	217.511
292.689	244.202	283.403	202.118	277.376	308.002	357.542	215.527	285.282	307.535	214.787	321.271	307.544	455.769	279.715	281.796	512.625	231.21	408.918	189.253	180.546	306.194	331.095	282.198	305.624	295.115	183.466	294.433	296.568	175.87	326.072	232.176	371.596	238.222	212.641	184.136	375.328	333.063	230.686	274.347	366.189	208.763	334.942	347.815	261.173	298.786	288.985	268.424	338.201	221.312
300.686	254.455	285.108	207.679	276.334	299.44	352.409	215.651	293.571	317.171	216.626	321.689	314.607	462.514	280.414	281.5	516.555	234.838	414.342	190.844	179.467	311.599	347.688	282.978	303.853	291.136	182.166	293.355	299.251	171.918	324.787	239.686	374.208	234.751	212.156	183.757	372.308	332.34	230.596	274.589	362.277	204.649	332.761	367.748	269.37	301.721	286.708	268.312	338.371	223.551
308.82	257.71	279.13	209.527	266.812	310.075	351.858	206.231	297.41	318.644	218.389	313.842	304.646	455.22	279.295	272.867	513.117	235.044	409.165	189.82	177.708	317.389	327.459	274.078	303.071	287.036	182.865	286.69	294.121		316.594	229.196	374.428	230.101	211.797	182.928	369.649	318.028	229.335	270.568	350.5	205.18	324.939	368.98	269.128	293.554	279.016	266.364	336.161	214.212
316.878	265.576	271.778	215.065	251.46	300.005	340.716	198.191	298.941	311.203	218.538	312.237	305.653	462.638	279.918	276.096	514.388	240.611	410.597	187.061	181.334	296.914	316.174	276.749	301.71	290.109	181.745	291	298.074		321.722	233.885	377.467	228.372	214.86	183.434	368.012	318.023	230.39	251.784	349.118	202.827	326.492	374.413	272.765	292.913	276.53	262.151	324.006	207.135
325.371	268.105	271.884	220.808	240.266	304.05	338.072	199.396	293.179	307.002	213.122	305.608	315.845	457.616	277.677	261.893	511.326	237.419	394.089	188.84	179.787	267.648	327.233	279.07	299.005	281.68	181.155	287.793	291.269		324.582	244.393	387.602	225.323	220.241	186.119	368.423	317.083	228.235	235.785	344.373	207.062	325.447	368.742	262.789	281.426	277.845	260.658	306.276	201.784
333.854	258.889	287.679	220.256	239.541	301.384	341.656	202.016	293.19	310.611	217.869	304.016	318.894	457.965	276.799	275.514	522.782	231.328	405.227	189.659	181.083	267.844	318.835	284.123	303.619	285.842	182.896	292.858	291.942		324.8	238.329	386.428	226.521	221.291	189.054	370.492	316.37	229.842	234.499	333.794	210.299	333.125	371.951	268.33	282.894	280.973	257.208	302.34	201.016
341.827	262.921	283.696	222.993	246.677	299.753	339.025	202.03	289.081	309.177	213.757	299.481	310.395	452.642	275.265	275.686	513.542	226.109	397.264	188.351	177.984	269.862	313.956	284.063	310.294	276.806	181.812	290.595	283.602		324.849	237.853	380.976	229.759	218.129	185.625	370.997	312.536	226.608	240.066	317.768	208.18	338.375	360.936	253.69	270.148	282.401	258.265	300.05	202.868
349.777	256.991	285.31	218.206	259.667	299.589	328.285	201.484	280.423	312.721	211.411	305.92	307.275	451.722	276.969	278.645	512.84	223.369	399.403	187.76	174.841	283.253	317.941	285.078	307.031	276.888	185.735	285.87	279.126		320.835	237.591	380.243	226.29	217.654	180.459	364.48	325.555	218.815	243.289	317.149	206.509	338.067	345.131	253.845	283.252	282.984	264.191	296.312	203.653
357.753	266.757	275.383	211.242	288.433	302.106	336.573	201.663	275.535	303.486	217.317	312.669	298.055	452.124	281.212	276.506	501.446	226.692	395.699	186.425	178.051	286.057	316.477	283.468	306.156	279.255	223.634	284.191	278.017		327.562	232.156	371.89	228.083	211.529	182.359	360.662	321.687	219.659	246.725	315.629	209.477	331.458	354.754	249.886	267.657	279.16	258.637	298.354	197.027
365.803	261.672	271.031	204.378	299.036	303.889	338.357	197.468	276.746	299.704	218.297	320.353	296.787	452.002	281.513	281.075	494.504	234.857	399.277	184.858	176.455	285.56	328.424	286.736	306.962	280.736	230.541	288.627	276.997		324.413	228.753	349.999	233.555	210.512	178.899	360.871	318.925	219.524	247.277	317.663	208.144	332.897	360.702	243.764	281.872	280.286	265.616	296.865	196.699
373.871	262.137	265.469	202.075	307.916	287.836	342.428	196.556	275.794	295.125	222.417	324.532	293.289	459.761	288.341	278.758	509.611	238.06	397.055	188.428	177.664	283.536	310.787	292.289	310.142	297.432	230.165	288.593	272.555		331.472	230.206	334.917	236.431	211.76	180.359	362.961	315.955	229.998	248.727	324.596	211.159	336.258	362.25	263.75	292.25	283.651	263.951	301.159	202.984
381.642	254.976	269.675	189.745	306.856	293.906	341.639	194.313	282.097	303.231	217.977	330.175	299.178	462.277	285.784	281.266	520.741	237.605	398.7	187.17	178.928	283.277	306.845	294.944	310.362	307.01	225.958	287.718	276.981		324.648	235.612	318.623	237.929	209.65	178.299	361.405	314.105	226.232	241.636	322.612	210.424	326.249	366.299	259.794	293.244	280.826	263.725	304.711	207.216
389.795	243.428	273.783	190.926	299.71	293.941	339.485	193.641	284.594	300.643	212.776	326.706	305.249	459.702	282.725	283.474	526.772	232.848	400.223	186.583	181.751	299.479	317.165	290.585	310.79	298.433	220.232	282.719	277.401		321.623	235.996	311.721	234.614	208.846	178.404	359.027	317.757	229.527	232.284	315.047	204.605	320.37	366.801	262.996	295.324	282.316	264.123	308.582	199.703
398.211	243.057	276.589	200.051	296.264	297.462	341.325	199.049	287.602	302.642	212.225	324.437	308.908	461.593	281.231	281.799	517.544	237.516	406.556	187.065	178.375	295.118	311.952	287.224	316.6	294.69	220.62	285.95	277.857		327.613	232.771	339.765	235.033	210.275	175.495	366.24	320.373	231.155	225.483		200.219	320.268	367.797	259.664	291.304	279.615	263.363	317.05	197.789
406.284	244.479	280.099	200.587	291.063	302.522	338.109	199.199	284.412	304.465	212.989	315.764	310.651	458.332	279.508	284.49	502.755	234.556	405.662	186.244	178.487	275.344	307.871	289.208	309.753	289.239	217.555	287.483	268.499		326.218	227.547	382.763	234.453	204.945	171.354	362.992	326.993	228.769	226.099	312.934	197	319.308	369.595	267.86	299.246	274.626	257.733	316.082	195.507
414.488	240.25	286.396	195.817	281.063	296.727	343.877	194.392	285.859	304.14	218.721	309.211	301.779	459.795	275.106	280.962	520.121	237.728	411.059	189.688	180.316	277.125	313.887	289.234	319.119	289.806	220.678	288.886	272.314		328.904	229.724	398.688	231.4	204.495	173.05	366.1	326.244	228.195	224.619	307.832	191.257	327.918	370.352	267.91	301.772	277.521	264.5	314.214	191.104
422.485	233.268	283.982	194.214	269.696	284.435	343.562	191.812	286.532	306.965	219.657	316.351	296.425	456.587	279.273	281.029	514.338	236.446	417.287	189.239	181.236	286.17	309.88	290.417	321.176	300.581	216.538	288.745	275.218		330.239	240.369	402.606	227.346	205.417	177.949	364.349	319.413	229.094	231.141		182.768	330.485	360.204	251.749	295.359	272.154	262.67	310.1	189.27
430.612	234.123	294.367	198.812	267.701	297.238	345.74	187.946	281.833	311.624	216.105	323.455	284.725	459.543	270.423	285.391	516.254	237.116	427.079	185.393	179.689	270.109	303.516	289.497	307.111	309.666	219.792	291.859	271.073		333.369	242.203	395.481	221.232	202.538	174.941	367.61	321.713	227.685	230.694		187.295	331.725	356.064	253.326	284.953	263.412	257.424	298.253	190.3
438.66	222.316	304.236	201.278	270.785	298.25	346.285	192.848	274.187	322.283	217	330.857	278.711	459.144	272.377	270.795	508.314	234.859	428.206	187.975	179.131	278.707	302.553	284.673	307.539	304.393	221.716	291.703	268.574		332.671	237.818	377.206	220.195	203.259	173.583	363.674	327.477	230.685	239.374	297.556	185.505	341.701	352.565	257.514	287.853	265.081	251.854	290.033	189.786
446.711	214.299	297.828	200.965	283.34	300.79	345.007	195.787	272.137	330.06	213.825	332.339	285.627	459.698	270.103	261.91	505.997	234.29	420.693	187.726	176.956	278.149	305.258	283.93	303.775	297.649	218.285	294.45	270.071		332.111	242.52	365.11	215.109	206.17	173.904	366.951	320.748	229.878	234.065	291.808	175.527	332.529	351.926	258.695	289.036	271.364	258.944	287.358	195.501
454.966	209.55	299.863	196.771	286.406	284.546	342.447	195.399	275.915	328.412	211.631	327.982	290.601	457.512	270.35	253.044	504.018	230.098	489.731	187.721	178.809	289.051	313.34	291.081	303.068	296.572	220.547	290.516	270.756		333.116	237.169	362.284	211.861	206.588	173.44	362.348	316.867	233.837	243.733	294.32	172.174	340.603	350.836	259.905	292.158	272.906	258.789	285.676	200.164
462.97	219.425	297.261	194.938	287.433	295.153	339.185	190.186	278.636	328.221	208.009	331.153	293.12	455.702	267.496	269.652	506.267	227.08	568.66	187.528	177.723	282.087	320.231	290.387	293.541	291.719	218.064	291.065	267.825		331.577	234.989	363.547	206.429	206.166	174.476	360.049	313.448	233.32	245.656	292.651	170.007		346.274	256.445	290.064	272.017	259.359	290.047	197.638
470.945	215.256	297.821	198.374	289.68	293.125	340.379	191.808	280.216	328.249	210.748	329.447	290.526	450.756	263.314	276.791	554.233	227.517	580.334	183.146	179.163	266.103	320.197	287.43	292.77	284.607	216.401	289.367	275.114		332.944	232.773	359.522	209.649	204.752		357.314	311.353	229.246	236.844	289.763	171.344		353.227	255.214	296.813	271.225	261.543	298.101	189.094
479.136	212.63	294.441	196.544	288.674	293.06	336.723	192.345	283.245	332.792	207.102	324.496	292.924	453.172	268.761	282.359	571.539	234.532	577.143	183.536	175.877	260.495	317.218	282.571	293.208	281.16	218.331	288.176	273.829		329.919	236.027	363.611	211.508	205.037		359.869	306.411	226.523	231.316	291.52		339.813	343.938	250.432	290.88	266.366	262.125	296.396	187.312
487.133	212.6	290.633	192.725	279.41	286.582	333.537	190.146	289.218	328.01	211.817	326.303	299.085	450.294	271.261	281.213	612.287	238.795	575.928	183.803	176.352	256.955	309.691	283.201	295.603	279.518	218.145	290.166	281.186		330.155	236.608	367.001	213.975	203.901		360.751	312.937	227.773	235.528	285.296	172.231		335.862	250.896	293.358	263.264	266.787	294.739	185.055
495.594	210.506	290.02	184.857	277.989	280.149	339.465	190.153	284.185	327.329	215.666	317.334	305.696	446.707	273.408	284.577	632.778	240.31	568.094	182.173	176.503	259.945	308.407	287.8	302.815	272.27	217.997	290.308	277.085		334.534	235.101	368.732	214.252	206.723		362.235	323.22	231.621	230.712	281.539			336.627	237.378	274.068	259.153	259.757	281.1	190.736
503.641	216.61	300.782	184.148	285.602	279.592	337.507	192.646	278.296	328.141	211.685	319.671	305.944	446.745	282.897	277.375	640.924	243.122	567.568	183.342	177.864	249.464	320.489	290.875	303.931	270.01	215.767	288.715	275.983		330.3	236.8	361.483	216.278	205.546		362.873	321.197	225.406	241.508	283.041			341.261	233.148	263.287	260.686	262.855	285.709	185.037
511.641	207.88	300.266	189.072	287.534	290.19	345.213	192.695	273.51	332.248	210.657	320.765	310.723	443.488	281.541	281.113	654.242	242.713	563.856	189.335	179.622	266.753	310.566	295.041	306.487	269.062	215.945	286.052	274.829		331.767	243.351	357.168	218.742	202.544		362.077	312.256	228.106	238.95	297.139			342.699	244.816	257.821	258.181	263.486	286.733	189.641
520.055	198.998	300.606	191.658	287.206	288.209	353.393	192.196	273.262	325.687	215.169	322.331	302.202	440.783	285.605	279.542	619.103	241.303	558.159	192.908	176.76	277.565	315.458	297.137	309.957	264.368	215.539	282.325	282.23		331.115	242.674	357.245	220.79	203.824		360.073	316.27	229.432	237.581	302.002			333.679	259.153	254.948	254.621	258.166	283.002	189.71
528.129	191.589	301.716	194.91	283.645	292.007	351.921	192.787	272.951	327.908	213.516	326.56	309.511	441.288	286.804	279.641	601.737	237.752	552.022	193.797	177.035	277.223	301.47	293.41	307.329	264.352	214.516	288.528	280.238		333.122	238.297	360.537	221.739	202.208		359.54	316.176	227.59	230.159	313.141			325.309	254.195	252.615	254.308	257.08	282.552	190.664
536.469	186.545	308.9	192.491	286.543	276.221	344.048	192.332	274.19	316.93	214.68	319.131	296.588	438.163	279.805	281.397	593.654	238.046	550.843	192.131	174.869	267.565	288.812	289.809	308.21	259.7	216.379	287.558	285.468		326.192	241.322	369.847	219.267	202.074		359.021	317.364	228.55	234.919	311.472			331.708	258.595	256.719	257.543	250.846	280.095	196.151
544.51	188.198	301.623	189.756	280.761	290.827	345.742	190.287	271.884	314.279	209.024	317.898	295.534	435.697	279.478	276.039	563.9	239.351	543.527	194.99	173.298	270.252	296.582	288.028	305.353	259.651	217.404	295.344	290.213		332.219	246.79	364.327	209.49	202.1		353.403	305.45	233.198	232.211	319.552			333.035	254.286	249.389	258.312	250.544	277.121	195.819
552.757	189.217	304.48	188.782	281.609	290.874	342.746	188.464	274.579	304.946	207.212	316.177	290.294	436.982	275.107	278.963	552.091	236.742	539.132	198.584	173.006	261.948	291.728	284.799	299.214	253.24	216.667	294.184	288.738		331.807	241.737	362.719	206.635	201.09		355.388	308.02	231.344	237.036	319.144			337.695	233.993	267.587	254.674	253.109	270.912	196.336
560.454	185.827	303.028	189.438	285.05	285.784	339.901	189.329	271.348	298.337	208.712	316.045	300.567	432.588	275.673	271.211	523.235	235.958	538.211	201.663	174.839	246.837	288.785	287.232	290.936	255.131	216.97	296.627	291.457		334.055	245.349	362.919	213.363	202.054		351.666	300.224	227.472	237.001	315.833			333.086	248.383	290.153	256.391	252.938	261.532	195.522
568.42	187.381	309.661	191.134	286.197	291.267	348.172	189.573	280.815	296.496	208.807	310.941	294.796	437.498	278.613	271.408	495.806	232.062	536.318	203.311	176.816	239.907	284.606	292.644	301.793	256.163	215.718	296.194	286.826		337.229	242.589	367.648	216.043	202.827		349.861	309.133	226.955	230.823	310.017			341.76	250.723	292.565	255.492	250.469	267.703	192.798
576.439	187.568	301.611	186.733	277.854	284.83	356.407	187.837	288.851	292.856	214.478	304.523	300.125	436.92	273.523	276.482	471.92	229.486	526.609	198.005	175.951	244.536	281.183	294.551	293.735	252.83	217.242	301.626	292.964		339.722	252.558	371.643	222.994	201.677		352.201	302.653	220.175	230.99	308.039			327.014	256.192	283.685	248.235	251.998	276.219	189.817
584.47	187.432	299.374	188.455	265.788	292.181	348.782	188.164	287.834	299.039	208.758	310.19	293.528	436.56	272.179	275.981	457.162	228.648	523.563	192.145	176.525	246.625	271.732	287.747	286.663	252.095	216.602	298.811	292.881		341.411	243.378	359.228	229.332	201.324		350.764	304.886	215.353	229.577	311.39			330.734	257.176	290.266	247.429	249.695	274.217	190.219
592.483	184.838	302.826	185.735	265.565	294.55	348.138	190.567	280.946	300.366	204.907	301.971	287.988	438.99	273.967	270.951	440.747	228.495	516.477	191.192	177.744	268.88	256.025	279.613	281.973	244.468	215.237	295.91	295.618		343.566	246.899	362.471	232.296	203.718		350.263	308.663	219.271	221.243	306.864			331.076	257.063	269.398	246.048	254.952	276.847	190.468
600.546	185.308	307.571	186.351	269.564	287.517	351.394	186.766	269.826	301.59	199.664	311.808	285.594	439.826	276.1	276.198	416.032	227.777	522.272	194.929	174.622	251.073	244.655	281.203	286.765	243.85	212.688	295.455	303.745		347.268	250.889	365.116	238.216	208.265		348.488	306.145	219.323	222.602	301.631			333.406	258.914	259.886	243.134	253.981	280.041	189.109
608.538	184.456	308.97	185.127	259.924	279.811	341.671	182.89	264.274	299.959	207.669	310.636	284.698	435.197	276.537	274.034	406.064	221.793	517.069	194.291	177.236	262.456	250.143	284.221	292.512	238.071	210.288	296.233	303.834		352.31	250.303	359.022	226.772	208.396		350.069	311.618	216.117	228.323	286.792			331.443	260.783	267.023	252.566	249.239	282.241	195.344
616.965	184.226	304.426	183.425	253.734	275.09	339.418	183.077	266.509	295.451	210.994	314.813	280.057	434.991	275.804	272.081	394.95	219.399	506.62	195.499	175.354	260.523	249.25	284.455	296.265	234.307	209.801	296.373	301.594		355.853	254.994	356.284	219.227	203.549		349.12	320.432	218.851	242.184	284.411			329.787	260.39	266.485	260.125	248.542	277.039	198.308
625.014	183.969	304.23	186.171	251.332	270	343.345	178.138	271.515	293.736	212.844	313.322	285.079	432.382	276.122	268.755	385.65	216.878	496.144	196.306	176.416	264.904	251.876	279.437	292.622	231.494	210.956	289.999	297.512		357.165	253.004	345.001	210.463	202.134		347.48	319.332	218.907	250.02	282.227			335.978	253.893	261.893	258.121	249.746	276.736	198.165
632.973	181.939	299.678	182.033	257.29	279.292	343.075	181.662	277.883	283.82	213.059	312.964	285.697	437.129	276.31	270.917	387.745	213.114	473.637	197.695	175.044	272.141	256.857	276.511	296.619	229.572	211.177	291.007	291.712		358.975	255.501	353.051	201.6	197.931		344.653	329.562	217.552	245.773	282.645			336.908	251.536	255.303	254.584	244.456	269.423	192.161
641.349	180.495	296.82	180.705	257.201	274.667	327.192	183.013	281.796	285.255	209.065	313.296	293.496	435.132	274.339	274.98	389.732	216.252	461.454	196.483	174.102	258.267	271.662	274.786	296.42	225.051	212.277	288.343	284.638		363.535	254.865	364.389	207.442	197.392		337.525	325.239	210.768	244.842	281.941			332.392	230.529	257.337	250.301	242.306	262.989	191.344
649.389	180.137	300.031	178.687	253.989	269.365	330.715	182.879	286.488	277.365	203.935	312.211	291.064	431.088	272.467	271.813	388.415	217.545	450.99	196.043	175.923	264.28	271.609	274.269	303.519	225.367	209.446	288.816	283.796		371.669	258.202	357.309	215.789	198.216		337.373	306.573	211.234	232.153	283.172			330.249	233.808	273.677	254.044	239.87	260.562	190.77
657.677	181.18	298.823	178.631	253.673	282.865	336.305	180.888	285.793	274.815	199.737	300.304	292.1	429.366	270.494	276.762	399.721	223.229	431.603	194.622	179.125	273.559	271.344	284.481	299.699	223.521	211.117	290.555	280.703		374.669	252.32	352.791	222.228	198.224		334.678	308.946	206.75	236.394	283.808			326.879	231.091	284.444	243.893	240.785	255.117	184.83
665.666	178.827	303.8	176.718	250.26	281.768	333.507	185.825	281.804	261.451	200.748	298.896	290.594	431.269	270.708	275.18	405.117	226.809	415.749	195.01	174.984	270.049	267.532	299.25	293.213	223.19	212.215	290.717	274.522		388.633	254.851	351.241	222.724	197.116		332.841	306.506	202.929	230.988	283.015			324.16	241.921	285.677	239.412	239.319	251.357	186.418
673.633	177.808	308.829	176.897	242.944	278.69	339.369	184.762	275.772	256.364	208.038	299.442	281.999	433.028	273.53	273.335	396.559	231.285	403.568	195.661	176.012	277.308	261.457	322.18	286.478	222.956	212.371	294.75	277.534		402.881	251.746	362.958	221.728	196.676		327.389	313.195	204.459	226.963	286.459			341.417	252.959	283.657	239.764	242.894	252.222	187.325
[truncated: 83 more columns]
