# Supplementary material for: Sustained store-operated calcium entry utilizing activated chromatin state leads to instability in iTregs
Source: eLife journal article supplement (doi:10.7554/elife.88874), 2023-07-04
Supplement: fig2-data2 [file 23min Tconv.xls]

## Sheet: Intensity Mean
Intensity Mean
Time [s]	Intensity Mean::1000089804	Intensity Mean::1000089805	Intensity Mean::1000089806	Intensity Mean::1000089807	Intensity Mean::1000089808	Intensity Mean::1000089809	Intensity Mean::1000089810	Intensity Mean::1000089811	Intensity Mean::1000089812	Intensity Mean::1000089813	Intensity Mean::1000089814	Intensity Mean::1000089815	Intensity Mean::1000089816	Intensity Mean::1000089817	Intensity Mean::1000089818	Intensity Mean::1000089819	Intensity Mean::1000089820	Intensity Mean::1000089821	Intensity Mean::1000089822	Intensity Mean::1000089823	Intensity Mean::1000089824	Intensity Mean::1000089825	Intensity Mean::1000089826	Intensity Mean::1000089827	Intensity Mean::1000089828	Intensity Mean::1000089829	Intensity Mean::1000089830	Intensity Mean::1000089831	Intensity Mean::1000089832	Intensity Mean::1000089833	Intensity Mean::1000089834	Intensity Mean::1000089835	Intensity Mean::1000089836	Intensity Mean::1000089837	Intensity Mean::1000089838	Intensity Mean::1000089839	Intensity Mean::1000089840	Intensity Mean::1000089841	Intensity Mean::1000089842	Intensity Mean::1000089843	Intensity Mean::1000089844	Intensity Mean::1000089845	Intensity Mean::1000089846	Intensity Mean::1000089847	Intensity Mean::1000089848	Intensity Mean::1000089849	Intensity Mean::1000089850	Intensity Mean::1000089851	Intensity Mean::1000089852
0	630.005	419.239	584.026	377.959	381.437	486.581	436.039	583.284	306.521	292.507	406.094	414.289	439.576	398.969	387.985	369.337	404.077	564.39	370.909	369.108	329.383	421.244	436.491	305.696	431.341	427.41	471.133	384.473	323.96	436.829	383.628	248.519	446.371	505.314	375.365	318.469	444.706	317.822	458.002	491.216	388.192	367.198	490.109	423.801	348.241	502.864	396.657	385.19	323.742
8.366	620.597	397.986	556.828	336.851	360.673	470.52	422.639	617.732	301.471	312.388	423.478	390.868	420.48	382.398	377.819	337.857	407.324	560.039	377.821	357.609	334.095	401.759	430.324	284.83	426.262	394.875	486.282	369.588	316.794	435.931	400.455	246.548	437.604	482.574	361.22	316.756	427.519	311.084	466.021	505.604	391.842	378.825	488.855	412.373	337.793	477.712	418.259	382.633	325.68
16.535	583.018	417.272	544.967	339.312	353.554	437.575	412.797	586.743	297.587	301.446	406.56	387.173	420.494	368.099	373.716	342.272	393.533	549.192	376.194	354.929	341.598	402.843	418.604	284.902	457.738	398.176	457.265	358.655	313.498	450.936	385.932	239.112	428.314	468.467	368.544	324.805	415.596	306.121	460.563	493.248	385.184	386.989	487.645	397.198	334.905	462.203	434.73	377.87	344.454
24.927	558.02	410.653	530.566	336.08	342.547	421.003	422.077	575.583	285.409	292.212	408.413	369.073	409.755	354.364	362.294	354.111	372.537	535.325	362.769	351.946	338.442	417.482	412.47	293.166	438.164	389.56	450.487	350.562	298.91	445.722	381.367	242.382	421.661	475.916	369.159	312.151	396.408	296.806	446.523	480.887	373.888	369.557	487.84	397.862	325.686	461.2	420.882	375.551	365.449
33.044	541.963	403.181	551.287	356.161	353.716	397.176	443.276	556.975	292.554	291.508	399.864	357.061	404.687	373.98	379.528	386.511	368.619	528.395	352.712	355.929	326.827	400.945	399.007	294.215	408.316	375.232	436.559	339.959	292.438	431.951	378.289	237.085	419.346	474.537	355.379	310.625	392.744	287.402	448.734	470.65	384.041	363.492	476.167	415.138	318.973	456.97	412.146	369.22	352.635
41.1	547.876	382.867	543.108	329.168	349.963	402.962	443.541	539.979	278.419	292.021	383.04	364.998	392.213	380.732	378.904	393.732	377.292	526.631	342.697	341.167	318.372	398.603	400.005	288.105	392.062	376.394	416.689	318.214	291.147	419.161	375.465	235.953	420.323	468.536	352.381	299.759	381.918	289.316	426.928	464.417	378.329	343.543	472.134	404.396	317.833	454.295	428.3	369.026	335.166
49.403	584.649	377.524	530.867	339.854	335.769	448.12	418.936	538.9	288.438	285.432	366.473	361.22	390.975	374.241	390.012	365.09	389.636	524.202	348.117	332.832	307.52	401.953	405.654	282.907	395.912	367.061	407.51	310.657	282.899	401.458	382.171	239.918	415.661	460.387	347.828	303.806	373.208	272.006	408.773	453.425	372.034	366.594	448.228	401.976	303.901	448.574	421.242	362.753	320.508
58.128	586.344	404.361	524.994	349.369	345.35	462.505	423.765	592.949	299.188	294.005	380.912	356.567	414.788	377.145	399.067	362.3	391.466	551.168	355.327	363.975	327.692	418.787	419.312	304.666	434.735	403.825	428.09	329.379	285.149	379.841	418.096	246.213	430.736	478.02	351.024	327.078	399.718	278.176	421.067	476.152	380.003	374.069	470.548	396.621	308.104	450.221	434.433	365.992	356.926
66.645	578.652	385.537	492.415	323.561	331.635	429.238	434.743	571.94	311.616	264.897	406.959	346.673	418.967	378.102	381.872	369.958	389.475	515.403	353.734	355.941	313.538	421.049	426.991	287.58	408.107	396.062	429.708	347.696	276.841	388.034	386.554	240.481	425.605	463.063	338.703	318.005	394.849	271.503	419.944	465.899	390.79	369.158	482.328	391.966	304.666	443.689	405.525	346.962	339.192
74.586	588.503	388.134	453.613	313.212	330.105	435.877	428.203	550.909	306.222	274.567	401.253	346.934	412.238	375.389	379.211	361.076	394.857	497.889	345.822	351.43	309.051	421.84	421.427	280.804	392.575	396.353	415.326	335.167	269.59	380.607	390.521	235.766	428.516	465.276	326.33	315.941	392.911	274.827	412.334	474.445	379.082	351.171	485.606	386.038	307.131	443.873	388.831	336.463	327.431
82.737	557.053	379.05	462.476	315.664	327.086	406.562	403.76	541.108	320.858	266.681	397.514	339.972	407.844	382.356	367.166	347.818	405.513	489.084	344.99	336.69	308.736	408.661	407.31	277.914	416.755	398.002	399.012	325.065	265.425	374.202	379.439	235.982	430.204	451.487	323.076	337.949	385.939	268.753	401.978	465.634	372.117	336.601	472.367	401.669	315.807	419.26	376.617	320.844	312.746
90.681	540.568	369.376	485.839	310.918	313.003	395.178	406.709	562.792	318.53	259.211	405.901	332.672	400.706	371.757	360.575	344.662	379.59	524.929	347.1	335.121	301.868	396.929	401.084	284.044	397.18	381.752	398.072	324.095	262.406	374.051	361.876	239.975	427.301	423.418	327.257	342.127	403.036	267.565	437.94	463.973	367.419	336.239	466.162	416.097	311.545	431.028	384.161	318.066	309.089
98.932	511.781	365.681	523.476	307.269	320.703	427.85	376.298	558.631	294.233	250.813	403.241	326.845	398.686	362.633	349.27	329.261	366.493	517.705	351.456	353.28	292.477	394.877	388.915	277.371	394.493	371.935	389.929	333.084	265.275	372.831	375.994	243.394	418.937	449.349	328.361	325.226	399.909	271.75	432.573	460.051	368.973	328.418	451.869	405.731	324.215	424.542	389.851	305.743	320.307
106.768	492.758	376.933	527.621	295.396	324.45	428.867	398.899	574.533	293.603	246.275	392.523	329.49	397.128	359.036	347.186	373.334	363.741	512.998	349.076	353.73	289.553	378.939	392.518	285.856	394.317	380.689	404.35	344.326	262.22	369.413	377.652	242.182	424.87	471.975	323.045	310.059	391.532	272.99	408.75	461.922	368.122	345.879	451.114	390.3	318.646	425.959	425.02	291.39	339.286
114.657	506.868	375.92	518.549	287.606	331.258	414.509	404.118	552.081	289.6	248.273	400.419	328.92	402.99	358.681	343.117	352.422	356.663	509.558	343.038	338.566	280.899	364.36	410.471	285.926	378.835	392.043	396.789	338.065	260.087	367.443	372.462	251.033	419.191	459.572	328.537	293.851	389.874	276.642	395.247	460.62	369.873	329.511	452.673	381.431	307.487	420.914	416.818	289.231	329.03
122.806	516.913	376.025	513.757	296.246	340.541	402.585	383.47	542.477	307.854	249.368	402.802	326.382	401.394	362.885	346.404	314.873	358.587	504.844	331.33	330.656	280.613	354.86	406.393	274.325	388.177	368.933	404.937	344.421	256.78	361.315	359.601	246.592	417.963	422.3	324.784	299.841	380.26	279.732	394.092	459.103	370.011	312.397	462.734	381.015	294.185	425.297	425.754	279.039	324.623
130.889	484.931	375.349	515.767	294.973	330.515	421.074	368.734	537.142	303.217	247.386	393.082	325.427	405.618	365.078	342.388	327.341	358.236	514.318	347.694	327.175	277.386	347.879	395.558	286.606	374.675	360.513	418.176	340.71	250.764	355.597	369.726	250.25	418.322	420.4	328.985	302.145	380.396	275.081	395.476	444.84	371.625	321.715	459.879	391.4	285.878	396.134	440.495	261.311	303.199
138.77	461.623	365.767	484.11	288.814	327.551	417.154	400.822	524.12	285.353	250.575	401.493	312.165	393.385	358.215	340.046	341.334	356.639	505.921	343.837	330.924	280.471	353.736	385.868	276.387	381.557	356.275	417.181	343.897	246.953	337.493	378.643	241.982	412.63	436.763	324.301	298.412	377.298	275.36	388.784	440.69	357.995	325.839	447.83	396.133	280.085	392.58	429.735	254.704	279.592
146.921	468.362	368.094	499.213	286.593	325.723	416.589	392.29	550.205	286.695	251.98	400.085	330.853	388.658	367.402	341.959	370.287	378.066	491.005	340.24	328.46	274.05	367.02	380.678	264.295	380.201	368.433	420.643	341.547	245.507	322.428	363.807	239.075	410.666	451.508	331.86	300.304	394.064	279.307	394.857	428.807	363.82	328.584	447.288	389.468	292.987	389.429	412.966	252.526	300.988
154.959	471.02	370.167	488.196	299.43	320.649	420.152	392.412	559.019	291.562	248.286	409.407	319.934	387.226	366.754	339.208	335.894	365.393	505.954	345.56	330.767	273.552	389.168	399.586	262.521	372.262	368.909	447.715	343.633	245.575	322.836	378.299	235.529	410.09	431.035	341.972	321.67	383.195	276.456	405.831	433.89	365.245	320.112	458.365	386.723	290.01	388.941	406.313	246.743	309.629
162.95	473.603	367.021	503.834	309.812	315.273	432.52	393.388	495.473	290.112	261.788	428.749	311.095	391.275	357.763	344.037	328.183	346.916	512.717		337.222	275.78	375.565	382.216	272.538	413.808	383.748	450.952	346.455	239.811	322.487	371.263	244.484	413.868	466.653	361.438	323.197	387.404	278.602	411.812	442.397	368.671	333.207	467.947	383.098	299.156	392.293	401.253	250.419	300.11
170.617	459.614	365.273	482.732	323.902	319.419	435.351	394.253	469.056	285.841	271.313	421.948	315.355	390.263	363.838	345.827	331.485	335.047	527.764	343.133	324.074	288.053	370.847	361.35	275.432	425.193	373.508	446.769	346.99	247.793	310.613	389.064	242.618	415.287	460.968	381.586	316.015	383.254	275.633	386.646	443.868	371.099	334.306	465.901	385.106	287.125	402.447	403.608	241.1	285.91
178.682	465.495	368.295	487.485	327.703	322.368	428.489	359.098	492.379	287.888	258.92	415.601	310.974	386.668	358.203	343.358	328.78	328.406	516.133		340.191	279.506	374.992	374.46	270.253	410.782	358.204	429.945	342.527	247.897	303.395	381.487	252.014	413.587	464.23	412.512	308.42	385.733	271.158	361.371	449.428	369.932	336.585	454.546	377.226	286.221	412.769	381.553	239.128	286.537
186.97	482.095	375.183	477.187	336.158	317.032	409.635	360.603	489.404	274.612	260.319	399.062	289.929	386.606	361.6	335.139	324.32	326.32	502.894	343.402	346.561	277.083	376.012	368.929	267.94	429.171	364.189	423.82	340.028	248.091	306.855	376.15	254.291	407.093	454.539	433.674	295.811	369.81	281.761	355.511	449.121	372.429	327.928	440.252	381.302	278.826	417.561	372.285	239.496	273.63
195.094	462.746	372.189	484.476	356.449	314.144	402.367	338.602	510.821	268.743	256.295	396.012	280.479	386.7	351.896	333.162	320.99	330.796	493.586		339.395	276.249	393.391	381.017	270.752	391.719	364.431	430.484	326.974	242.422	300.198	391.516	252.033	405.666	445.132	399.938	291.136	371.035	272.445	365.879	445.213	364.52	312.236	440.876	385.289	295.618	422.842	368.407		265.745
202.878	471.379	375.212	467.408	361.111	308.797	399.858	366.79	483.737	265.444	255.596	391.267	288.401	388.255	352.971	338.804	310.706	334.96	488.087		340.346	270.928	382.578	363.9	259.582	391.284	366.087	435.877	320.953	239.978	297.607	385.261	253.931	408.068	437.032	375.859	294.885	369.231	275.372	364.618	439.906	351.519	310.553	437.029	367.232	293.113	394.295	370	238.898	258.809
211.376	505.47	403.036	510.797	388.227	319.576	429.318	410.99	507.686	277.719	267.198	411.681	287.39	412.831	369.932	345.647	309.032	359.979	521.766	352.248	358.434	268.244	386.478	374.285	265.32	407.786	392.828	455.004	354.856	245.526	303.247	377.405	254.968	438.513	465.287	374.992	303.305	389.566	287.319	404.121	464.147	373.021	306.455	461.89	352.056	286.231	411.557	378.018	247.565	254.75
219.63	499.498	411.951	510.691	388.732	327.228	443.341	403.478	500.665	282.874	262.267	407.4	279.421	417.333	354.727	336.186	307.989	343.772	505.13	355.32	347.555	268.598	379.363	369.489	266.342	386.961	400.339	473.284	346.73	243.328	298.407	371.672	258.603	440.903	469.476	383.142	294.053	403.379	289.168	395.553	467.328	387.438	313.57	454.56	393.654	301.13	420.97	362.34	249.517	260.725
227.657	506.027	408.996	531.069	384.283	314.011	435.239	399.262	493.15	293.414	251.631	423.114	275.207	417.175	372.804	338.725	317.434	360.826	490.831	354.327	345.812	262.249	374.406	357.013	278.725	403.026	401.367	451.828	345.807	242.957	296.06	363.788	270.79	441.713	458.152	388.83	295.665	400.783	291.483	369.824	452.83	393.077	306.199	473.108	398.055	299.827	412.874	356.198	250.692	255.814
235.615	513.903	421.53	528.988	372.467	293.059	422.334	414.975	482.971	297.146	255.145	426.066	265.694	422.856	366.778	334.541	318.222	364.829	504.985	362.286	352.701	254.967	374.71	365.603	270.692	408.96	397.26	451.343	333.377	245.189	296.459	373.301	261.887	440.584	459.614	382.476	294.788	402.275	305.324	359.434	432.797	391.32	310.414	479.446	394.93	299.825	426.402	364.075	256.347	254.87
243.504	523.444	418.422	538.323	379.074	292.997	410.187	394.605	460.722	289.314	252.99	432.346	259.466	417.642	392.21	335.301	330.749	367.109	494.265	355.676	356.405	252.303	375.337	357.301	274.552	395.497	399.516	441.541	331.198	240.103	295.794	362.778	270.34	437.231	442.385	380.902	287.444	398.731	300.713	353.396	430.672	387.992	312.521	469.08	375.177	304.541	421.686	373.32	254.159	261.882
251.906	528.611	404.629	515.542	380.538	298.653	415.761	385.564	458.889	285.422	247.319	428.672	288.103	411.899	370.774	339.255	347.054	357.956	507.103	360.379	359.348	250.044	375.805	340.434	280.53	386.592	389.99	432.735	344.865	241.19	294.739	357.145	268.135	437.688	454.726	386.354	278.901	391.012	299.006	343.293	430.262	382.889	311.154	466.787	389.8	308.994	406.268	379.987	247.286	258.322
260.358	514.283	400.397	494.133	376.317	291.023	413.32	393.62	463.973	283.256	236.984	418.359	310.277	409.143	361.225	334.295	341.02	342.308	502.38	374.32	358.692	253.146	375.747	338.576	275.967	404.338	385.928	432.821	336.675	240.159	297.378	353.204	268.962	438.239	446.509	370.771	277.955	394.15	324.042	351.632	435.608	380.063	292.563	464.96	374.568	303.527	406.457	375.566	242.776	249.474
268.452	495.49	392.409	504.447	370.444	281.293	402.609	402.224	475.014	278.949	237.703	412.949	315.35	407.669	350.159	332.693	334	339.31	479.791	369.961	355.676	255.993	369.297	341.684	271.714	377.057	386.116	461.867	332.444	239.326	298.934	376.093	259.134	432.774	437.42	380.901	276.23	397.443	311.402	367.576	455.035	374.427	308.075	474.86	383.017	300.026	414.184	359.267	239.878	253.129
276.679	508.99	393.944	501.346	361.355	277.055	393.762	384.949	475.808	283.677	236.947	423.647	301.453	414.105	348.039	338.308	301.471	335.01	491.755	359.515	359.931	251.14	370.015	357.043	272.383	382.834	378.279	469.962	325.757	239.28	304.802	351.844	252.534	431.264	447.662	374.901	277.226	396.595	302.724	365.605	442.534	378.213	314.507	480.319	369.317	297.951	430.844	355.753		247.716
285.099	540.004	403.268	494.331	363.059	296.883	411.825	384.186	514.949	280.881	233.424	409.784	312.394	419.249	365.872	360.361	301.612	349.964	480.911	375.66	364.504	250.418	355.231	352.424	280.733	378.033	392.215	461.056	326.809	240.192	290.173	368.209	267.346	441.291	463.741	358.529	272.423	395.075	306.968	362.964	441.18	379.05	316.306	487.892	373.771	305.924	427.853	359.436	240.636	250.811
292.824	524.129	410.103	482.122	355.895	285.841	398.13	366.685	495.554	271.187	230.442	422.635	326.256	408.033	371.01	350.402	308.077	344.6	475.195	371.622	346.951	251.28	368.185	347.202	273.843	376.189	390.752	467.436	323.566	233.638	282.991	351.637	248.843	435.098	458.718	349.945	271.119	391.666	301.193	358.31	445.657	385	311.534	484.184	372.686	310.559	421.33	349.43		250.096
300.98	542.158	412.933	496.918	357.758	300.575	401.576	366.596	474.333	279.721	229.605	429.099	336.859	409.556	367.496	335.796	314.701	349.409	497.661	362.295	357.116	250.048	383.2	353.36	279.591	401.301	376.987	464.085	319.831	234.755	294.474	360.016	234.607	432.923	453.361	355.981	269.763	394.703	290.295	361.983	455.806	358.53	307.99	472.921	372.844	310.308	446.134	340.147		248.122
308.981	546.228	417.615	505.93	348.056	299.067	392.744	385.344	463.755	277.687	232.72	440.165	333.535	416.321	361.579	328.751	324.878	340.712	486.063	361.458	355.566	247.635	387.236	371.42	281.869	411.287	369.776	462.174	338.298	232.924	305.264	368.631	242.537	432.867	464.651	351.022	274.217	399.042	290.698	362.849	455.884	348.59	308.772	472.13	375.502	309.104	455.774	341.252	243.07	245.396
317.048	533.654	412.933	505.48	354.864	324.28	376.949	391.034	454.564	270.692	228.852	436.02	310.622	411.458	351.621	329.119	319.197	336.761	488.061	363.535	363.672	251.261	368.781	356.19	278.922	392.181	365.796	453.323	333.199	239.197	300.141	361.947	247.037	434.753	475.255	347.798	278.775	411.124	281.026	353.017	447.357	364.677	323.022	477.645	365.974	298.366	437.344	345.321	243.79	244.604
325.112	509.483	415.314	507.062	349.557	323.678	360.151	396.483	447.017	274.616	225.807	444.927	313.791	414.109	340.721	327.169	314.126	346.096	484.263	367.32	350.383	256.905	368.869	350.344	272.15	397.167	366.732	450.699	330.131	233.784	307.775	348.534	255.503	432.379	470.742	344.424	270.234	443.238	273.262	335.395	447.67	369.509	321.125	475.799	344.751	305.81	422.885	337.642	241.929	242.945
333.597	493.841	410.669	513.342	338.749	321.97	333.416	376.406	448.687	275.52	224.566	441.075	324.878	412.975	340.831	315.296	285.181	339.915	483.188	363.475	358.569	255.714	368.396	349.413	268.489	389.787	344.747	439.747	328.826	233.335	298.683	351.102	252.665	429.734	476.189	340.477	264.78	420.829	262.724	333.438	442.743	357.563	315.469	467.234	339.564	301.946	421.186	334.173	247.318	241.435
342.131	503.928	410.161	526.232	333.251	289.311	338.003	374.592	440.703	269.827	226.624	424.114	319.367	408.882	333.191	323.003	276.791	335.865	480.347	348.206	365.122	253.549	361.563	337.744	269.532	410.071	357.214	433.646	324.108	231.789	296.194	351.358	255.027	430.714	471.398	339.195	264.846	412.366	260.53	338.01	443.637	357.033	310.868	471.064	363.662	297.923	419.873	328.664	242.368	240.155
350.057	492.294	407.099	507.211	327.758	287.815	346.032	392.629	449.09	259.094	239.152	410.705	323.111	403.841	328.776	330.856	287.608	340.848	467.072	347.99	362.057	253.201	367.449	334.029	268.078	393.096	358.949	428.809	323.794	236.698	286.859	357.621	250.437	425.267	462.9	338.831	260.497	414.035	272.293	343.126	439.932	369.144	318.237	462.362	373.741	293.377	401.969	316.98	246.516	251.068
357.98	484.474	399.13	500.313	327.314	297.816	348.886	394.335	457.063	253.679	241.483	416.317	331.17	405.855	320.439	319.81	275.778	338.464	469.123		361.814	249.673	383.59	336.018	275.032	381.909	375.815	419.276	328.803	232.221	295.639	354.297	257.626	420.762	456.942	327.921	261.707	407.354	282.506	354.286	445.695	378.139	311.483	459.422	386.24	295.632	396.678	314.762	248.994	256.063
366.021	491.558	391.987	460.468	340.947	286.528	364.858	383.567	485.473	259.261	234.798	415.849	318.37	407.283	324.793	322.432	261.017	339.278	477.953		358.812	244.043	389.005	344.728	265.082	369.504	375.128	412.388	323.528	234.029	295.58	359.252	266.977	420.303	463.761	331.33	259.456	405.947	288.064	352.889	444.527	377.211	309.144	457.555	381.735	287.237	390.708	309.9	242.924	268.232
374.336	512.479	396.042	468.615	338.049	283.858	389.094	396.125	492.986	262.699	235.779	414.986	316.485	404.116	336.674	328.544	261.964	348.55	465.44		352.75	246.125	377.099	343.667	269.204	370.788	375.17	416.41	324.911	231.919	300.968	364.942	271.956	431.204	468.083	332.984	262.465	435.917	291.128	346.067	445.407	379.405	308.992	461.42	374.963	298.364	390.775	308.692	242.656	268.488
382.083	513.682	400.022	489.369	339.254	282.226	372.723	403.617	471.075	261.197	234.202	417.422	312.442	400.954	331.251	306.383	245.6	348.882	488.597		343.256	247.247	374.672	328.789	260.714	361.452	377.687	411.51	318.071	233.287	295.775	372.438	260.926	430.213	469.333	335.124	267.707	434.699	293.503	351.671	451.329	388.219	302.347	449.364	382.758	298.085	400.565	300.496	244.905	267.542
389.897	508.776	403.941	476.688	334.576	288.282	349.58	394.605	464.573	261.478	230.28	417.87	316.477	403.065	320.233	300.464	241.751	343.239	496.679		343.786	248.76	358.605	319.466	268.521	371.048	371.421	409.318	320.341	228.265	296.477	367.604	257.31	431.562	449.409	336.394	261.609	442.567	282.606	343.834	455.968	380.541	304.407	452.158	372.392	291.148	398.3	299.155	245.687	263.909
398.044	500.792	395.604	467.322	342.237	290.647	336.877	397.523	488.628	256.231	224.319	413.894	327.622	401.804	317.332	299.813	231.526	340.286	486.304		349.455	246.73	357.039	316.614	267.498	387.98	366.518	407.098	320.342	229.801	298.481	368.552	252.878	434.658	449.079	338.099	262.757	433.8	269.987	334.823	457.025	383.99	306.707	450.325	385.366	291.11	402.658	310.611	240.678	264.022
406.448	483.224	395.996	459.779	343.926	303.198	327.275	410.508	490.484	251.602	223.558	412.991	338.007	402.845	315.116	299.88	235.85	341.785	474.948		355.851	243.958	360.775	316.556	267.455	397.15	359.17	415.161	323.223	231.253	290.978	339.353	255.595	439.629	448.009	336.495	259.875	425.064	257.715	325.788	453.753	379.513	292.256	454.599	367.538	295.465	417.48	309.511	239.451	269.073
414.562	493.545	394.875	453.646	350.093	327.083	330.792	409.206	522.878	256.973	218.184	414.188	328.218	408.551	301.548	294.28	234.862	341.795	500.603		364.131	240.108	368.424	325.678	270.65	368.409	378.233	412.696	317.42	227.89	286.544	348.937	256.332	442.944	450.329	358.435	257.816	422.579	241.529	317.685	455.093	379.884	298.489	464.824	368.276	280.834	411.971	319.459	239.008	283.589
422.713	490.088	395.223	459.056	359.408	310.696	336.193	405.499	539.875	254.173	220.56	411.272	326.805	414.568	294.397	290.191	233.595	341.8	514.893		342.366	235.509	370.642	339.731	273.288	385.561	370.645	401.569	313.483	231.706	294.093	346.266	263.53	442.774	447.602	386.619	255.364	414.734	233.938	324.675	458.829	379.462	282.003	465.187	375.623	295.377	415.063	311.053	238.737	283.227
430.793	469.261	406.73	459.896	338.052	322.331	319.474	400.228	540.357	262.271	222.21	403.059	319.206	419.634	298.455	289.517	244.225	345.151	465.152		350.902	235.89	382.841	321.509	283.784	378.196	373.898	384.879	311.648	233.009	290.586	342.169	265.795	434.368	428.473	380.602	252.667	416.462	228.669	323.799	456.544	378.355	282.375	464.926	370.616	296.306	413.269	312.488	240.683	287.275
438.895	448.626	400.159	468.31	332.909	312.542	323.06	410.126	520.762	262.676	216.333	411.95	333.958	425.3	298.864	284.449	247.539	352.908	444.277		359.908	239.669	378.447	324.781	273.206	395.429	393.097	383.479	302.972	231.913	295.035	321.576	254.739	434.787	412.655	382.544	254.196	419.249	231.906	325.457	451.81	383.138	275.006	458.667	373.875	290.728	413.65	312.106		283.072
446.858	454.568	396.259	454.777	340.256	310.017	312.683	411.642	515.648	253.099	212.097	425.318	337.249	408.786	284.789	293.981	246.494	350.257	453.576		352.84	244.259	375.417	326.134	268.926	390.298	401.853	386.479	301.579	230.774	307.332	325.221	260.297	431.012	425.415	373.589	253.514	424.046	249.115	324.516	452.652	358.207	278.943	463.723	389.99	286.01	398.391	302.069		276.48
455.024	447.283	389.896	446.245	342.633	306.006	314.143	397.153	525.267	245.722	213.79	412.551	342.429	404.07	281.472	285.18	252.418	349.689	445.311		349.516	250.937	383.981	330.415	265.328	373.153	390.138	375.143	297.768	231.537	309.14	320.151	259.182	431.727	429.237	372.831	258.861	424.624	263.764	346.725	445.7	374.744	272.972	452.432	391.809	287.464	389.878	284.893		271.904
463.155	452.121	388.127	424.965	347.733	306.388	305.608	414.942	510.523	249.681	213.966	433.736	336.113	410.704	270.684	285.601	279.869	364.475	438.04		342.5	249.963	380.638	327.663	260.288	427.384	384.115	379.306	300.462	230.209	304.653	342.37	257.532	431.067	423.608	367.53	261.519	408.905	261.141	349.466	449.469	372.101	297.338	452.353	386.01	288.129	393.257	276.554		277.349
471.176	455.866	385.393	424.311	350.709	300.213	283.665	415.595	489.496	258.61	218.673	441.097	326.723	409.313	265.509	287.382	319.431	356.738	415.254		348.614	253.28	400.381	324.874	259.583	403.843	386.545	397.98	303.322	227.377	304.963	340.808	262.275	432.203	439.424	375.288	264.362	397.123	264.339	363.127	453.916	395.038	281.112	455.993	376.501	289.034	389.488	279.58		270.964
479.374	464.769	387.011	442.054	347.368	287.425	269.729	401.931	489.738	254.857	214.297	443.05	324.297	410.247	266.352	288.462	365.586	346.681	416.613		344.49	251.399	364.538	323.783	261.733	373.12	408.498	399.811	304.301	227.676	310.313	346.924	259.038	428.588	440.882	361.964	263.704	400.775	263.646	369.513	445.872	383.479	273.022	454.973	380.772	279.387	382.984	283.636		269.923
487.334	463.315	381.797	431.467	349.327	302.883	251.184	401.716	478.347	252.7	235.06	445.369	321.899	409.36	265.814	293.68	390.629	343.157	406.897		345.707	251.307	363.354	326.626	242.76	399.688	384.54	395.002	306.83	227.315	306.643	345.571	251.874	427.839	418	356.546	268.339	398.357	270.913	367.597	445.781	383.835	254.883	454.851	384.285	283.486	392.596	283.645		260.828
495.223	468.953	386.745	427.289	347.772	303.246	253.862	401.148	471.193	258.081	235.148	425.966	320.345	418.208	266.885	295.034	347.216	341.806	441.613		343.735	251.912	347.31	335.292	247.023	393.281	375.82	381.765	311.983	226.333	301.225	347.299	251.803	428.504	415.87	349.529	270.328	398.961	265.375	363.536	440.675	382.461	250.095	462.322	385.232	289.492	406.04	285.605		260.521
503.877	475.829	389.7	425.75	336.859	314.186	264.552	409.01	468.892	255.912	236.662	403.081	298.385	410.876	267.209	291.37	306.496	346.683	419.481		348.766	249.293	345.242	331.955	246.295	411.287	383.849	374.97	314.723	224.662	297.562	336.88	247.417	429.549	409.866	345.773	263.307	404.888	268.524	354.512	462.874	382.475	245.946	460.06	389.205	283.844	405.052	290.259		256.251
511.878	479.185	384.878	427.48	321.102	309.107	272.248	402.17	479.365	251.547	246.868	407.165	298.28	405.223	263.114	292.514	322.721	343.305	456.917		339.263	254.45	342.904	321.426	242.072	401.755	388.249	364.475	312.558	226.862	291.063	339.456	254.103	427.549	394.98	340.327	263.223	404.988	263.507	368.165	452.644	362.112	248.337	456.341	376.248	290.586	393.014	292.151		243.828
520.028	484.353	384.37	432.258	309.201	299.731	260.933	409.209	490.707	243.716	259.333	415.393	295.693	409.331	265.004	293.458	298.628	336.34	452.872		334.726	244.699	343.894	319.543	232.152	367.277	399.818	352.898	306.378	228.096	283.211	341.393	264.256	425.933	401.79	339.98	264.58	398.644	260.466	374.213	445.4	368.909	269.695	458.732	374.64	288.956	389.693	288.674		244.777
528.371	483.798	391.175	425.054	303.059	279.435	265.307	392.778	519.172	247.502	273.743	425.034	295.408	402.03	261.349	288.915	286.423	348.528	437.129		325.551	250.349	336.913	334.638	234.284	392.785	401.037	357.762	309.173	226.567	276.895	334.639	269.995	424.756	385.146	344.144	259.57	405.671	247.629	382.575	436.178	373.556	274.444	458.336	377.892	286.152	387.373	293.268		235.271
536.34	495.43	390.714	435.809	297.164	290.492	277.884	391.401	527.755	241.14	278.258	427.266	275.82	393.509	265.539	293.235	266.136	331.664	438.009		319.939	250.294	337.011	336.909	237.207	383.631	393.172	353.318	309.12	226.874	272.19	333.118	261.662	419.774	394.802	349.548	254.37	404.132	240.126	374.923	434.688	369.114	283.931	454.107	380.1	282.906	383.368	292.585		231.528
544.702	497.266	391.908	427.887	297.233	303.201	287.063	409.487	531.211	245.987	290.242	400.804	269.539	404.462	260.856	292.362	286.726	326.422	469.981		314.804	242.944	352.104	337.143	239.832	395.876	384.453	364.464	304.912	223.482	273.453	336.605	253.253	416.355	380.385	341.069	254.79	399.353	239.739	382.016	446.11	367.865	276.422	448.539	376.783	279.491	389.931	296.66		233.111
552.733	494.178	394.436	435.673	284.866	300.338	300.024	407.537	533.867	239.908	303.487	401.531	270.385	410.594	259.395	304.578	293.331	334.948	457.615		314.91	243.23	353.685	335.555	239.792	392.171	372.72	358.344	311.584	223.372	276.926	328.401	241.694	420.097	381.455	340.037	248.742	409.155	233	374.77	439.386	351.119	279.201	451.573	384.927	265.664	381.657	295.631		230.401
560.915	526.462	403.856	445.804	295.719	316.027	302.75	409.585	548.7	238.358	310.036	433.111	273.801	422.895	263.194	296.885	300.818	335.62	446.691		314.177	246.056	349.686	341.155	240.128	389.165	393.898	359.606	307.531	224.826	276.504	334.781	245.185	422.928	378.734	338.74	246.521	407.696	244.15	385.595	433.279	355.878	271.471	446.344	397.082	274.412	376.031	290.798		230.774
568.603	513.359	404.793	428.683	293.953	322.233	308.282	407.799	544.283	243.104	308.092	436.643	264.599	421.903	255.869	296.966	300.997	329.785	475.336		305.42	234.635	334.099	337.834	237.453	370.098	390.846	355.72	294.154	225.822	271.532	328.894	237.097	425.138	387.985	328.267	250.664	409.466	238.914	382.687	430.349	358.676	269.59	445.191	386.661	277.541	368.708	276.798		226.229
576.571	516.696	391.924	436.572	303.535	338.69	322.286	387.636	554.165	249.612	308.294	440.463	252.495	424.332	259.869	297.294	315.663	336.009	476.111		303.234	236.877	339.122	350.861	231.146	345.41	383.486	361.333	288.818	223.562	278.198	327.226	232.459	429.768	385.636	328.917	244.769	406.64	240.208	378.075	438.995	361.878	279.479	449.814	390.087	276.894	374.732	271.698		225.339
584.6	510.355	383.732	431.645	309.742	331.774	326.457	391.713	564.992	246.317	315.213	432.358	248.376	425.49	266.936	305.496	312.199	332.046	488.929		297.894	237.199	339.436	355.729	237.702	354.545	379.449	360.64	292.777	222.733	278.09	319.397	229.947	433.356	380.454	324.586	241.996	404.035	242.155	385.266	443.682	361.833	281.249	450.402	384.831	272.491	378.043	267.148		225.569
592.639	511.195	385.667	436.242	308.912	319.174	331.107	387.989	570.583	253.215	317.716	413.168	246.606	423.954	268.48	300.111	309.646	322.714	516.228		298.672	240.1	333.247	341.796	228.696	350.89	382.248	353.141	291.44	219.963	274.716	310.812	237.617	431.256	388.21	322.052	243.232	401.534	244.267	385.216	444.919	359.722	298.802	457.788	379.685	263.86	378.299	276.776		218.49
600.635	512.686	384.691	424.283	305.755	310.432	327.96	383.816	551.283	251.191	311.038	417.03	254.093	420.177	267.216	290.525	295.969	321.188	498.513		305.769	237.637	334.049	335.18		336.522	371.92	352.873	292.591	218.035	261.762	318.031	239.232	422.222	391.319	326.257	245.139	408.76	237.623	386.376	438.551	347.391	302.523	453.865	376.134	262.819	373.565	283.891		220.931
608.665	493.314	391.01	407.647	305.438	307.641	331.074	397.059	525.361	257.766	302.874	411.507	248.585	414.829	273.555	291.277	302.76	316.998	491.742		307.414	225.751	336.938	325.79	228.399	352.532	370.023	348.206	299.444	216.368	262.437	308.539	246.155	420.506	388.613	323.389	246.504	420.993	239.487	386.154	438.928	352.446	309.606	456.973	383.594	260.644	371.179	284.58		222.789
616.812	486.706	388.511	408.814	300.73	276.104	329.747	384.405	520.965	254.581	293.571	418.603	237.329	421.216	280.294	283.508	296.571	319.926	469.61		311.493	219.149	338.18	319.82	228.19	361.982	368.714	349.011	294.455	216.993	260.342	311.088	244.176	422.183	393.613	319.48	247.55	423.077	233.606	380.397	438.47	342.499	297.561	453.936	378.997	258.16	367.534	286.023		218.642
625.158	488.05	385.956	412.86	299.384	281.72	332.701	378.479	540.875	256.813	298.444	421.68	236.049	418.096	288.826	281.677	302.183	327.784	462.045		314.469	220.045	340.407	325.31	227.873	349.547	362.227	348.984	295.455	219.538	261.013	299.245	249.086	419.3	385.318	315.144	247.837	435.84	226.86	388.189	427.797	336.292	293.144	452.863	385.529	252.517	363.471	285.932		219.041
633.205	488.664	381.146	416.712	299.952	286.732	329.897	366.144	545.695	251.469	299.373	410.949	232.01	414.131	288.02	280.681	301.254	334.255	478.628		321.87	218.213	350.185	317.71	228	342.327	361.428	352.087	296.509	219.063	262.596	297.055	236.064	421.836	413.771	314.528	251.29	428.259	228.162	391.426	426.523	346.334	292.581	455.213	384.53	254.146	365.241	287.175		214.395
641.148	486.36	386.35	409.482	298.698	290.217	317.7	354.7	528.004	251.748	293.588	416.572	226.124	419.467	292.479	284.523	298.929	326.499	470.759		322.837	218.029	350.602	316.381	225.151	339.734	370.926	360.535	294.776	222.946	257.246	292.015	234.552	417.529	405.47	309.826	246.294	429.941	231.125	386.905	424.384	358.396	292.092	464.264	386.043	252.757	355.945	281.346
649.621	492.503	385.7	396.13	301.373	298.253	316.037	365.238	528.32	237.384	283.31	410.642	221.978	403.706	292.466	284.857	298.211	322.882	473.995		318.272	232.037	342.219	326.939		335.874	387.617	355.456	281.818	217.458	254.673	295.973	227.819	414.633	415.952	305.177	244.919	413.032	234.298	375.603	423.504	362.967	293.449	463.215	387.254	249.799	354.378	272.71
657.641	495.469	388.721	391.452	307.89	282.16	315.041	385.764	541.06	233.298	282.42	401.057	226.928	404.405	299.923	280.429	297.341	317.997	481.04		324.516	225.185	346.872	330.368	221.679	341.88	387.594	355.281	287.42	218.282	252.762	292.087	234.461	419.477	414.516	306.671	244.407	422.22	226.393	381.1	426.825	366.388	295.489	471.612	373.139	250.65	351.196	280.831
665.861	495.455	390.277	397.765	307.238	302.799	312.928	399.713	555.947	242.616	271.746	387.458	226.086	402.135	297.978	281.219	283.638	324.015	465.205		330.779	232.02	342.418	324.862	226.477	355.539	396.875	350.857	288.972	218.648	251.899	289.322	230.93	417.379	423.986	306.871	247.88	415.028		382.839	423.651	357.882	286.79	472.783	384.185	249.09	351.664	278.29
673.792	487.927	402.752	398.605	298.932	299.98	306.712	391.569	557.864	248.803	261.465	397.086	228.596	404.607	303.204	285.649	274.009	322.254	447.276		318.442	240.096	338.053	338.854		350.331	395.474	342.802	287.133	218.122	256.525	284.498	244.284	417.828	410.429	307.555	246.332	408.175	225.698	379.212	427.046	368.945	290.566	481.298	382.94	258.008	353.436	275.619
681.889	473.98	416.137	403.547	311.636	294.641	310.643	388.024	578.588	245.342	264.416	417.002	227.404	396.998	304.47	283.959	271.585	326.815	435.693		323.405	251.199	336.971	337.247	221.052	332.642	398.256	331.129	282.306	217.901	260.794	293.875	232.348	420.711	405.365	302.41	242.251	398.258	229.763	388.434	427.517	353.29	287.837	483.163	386.085	252.469	355.355	273.268
[truncated: 206 more columns]
