# Supplementary material for: Sustained store-operated calcium entry utilizing activated chromatin state leads to instability in iTregs
Source: eLife journal article supplement (doi:10.7554/elife.88874), 2023-07-04
Supplement: fig2-data2 [file 23min tTreg.xls]

## Sheet: Intensity Mean
Intensity Mean
Time [s]	Intensity Mean::1000035250	Intensity Mean::1000035251	Intensity Mean::1000035252	Intensity Mean::1000035253	Intensity Mean::1000035254	Intensity Mean::1000035255	Intensity Mean::1000035256	Intensity Mean::1000035257	Intensity Mean::1000035258	Intensity Mean::1000035259	Intensity Mean::1000035260	Intensity Mean::1000035261	Intensity Mean::1000035262	Intensity Mean::1000035263	Intensity Mean::1000035264	Intensity Mean::1000035265	Intensity Mean::1000035266	Intensity Mean::1000035267	Intensity Mean::1000035268	Intensity Mean::1000035269	Intensity Mean::1000035270	Intensity Mean::1000035271	Intensity Mean::1000035272	Intensity Mean::1000035273	Intensity Mean::1000035274	Intensity Mean::1000035275	Intensity Mean::1000035276	Intensity Mean::1000035277	Intensity Mean::1000035278	Intensity Mean::1000035279	Intensity Mean::1000035280	Intensity Mean::1000035281	Intensity Mean::1000035282	Intensity Mean::1000035283	Intensity Mean::1000035284	Intensity Mean::1000035285	Intensity Mean::1000035286	Intensity Mean::1000035287	Intensity Mean::1000035288	Intensity Mean::1000035289	Intensity Mean::1000035290	Intensity Mean::1000035291	Intensity Mean::1000035292	Intensity Mean::1000035293	Intensity Mean::1000035294	Intensity Mean::1000035295	Intensity Mean::1000035296	Intensity Mean::1000035297	Intensity Mean::1000035298
0	275.342	262.995	266.971	287.432	296.13	299.425	252.916	357.865	330.066	280.887	412.109	366.745	344.063	404.768	272.76	342.8	287.812	297.451	323.567	257.357	255.325	319.635	267.541	257.372	244.775	329.296	211.426	403.867	281.709	232.359	291.37	344.632	287.311	455.516	510.695	337.322	386.352	235.889	377.878	336.618	231.579	225.169	219.793	266.698	348.353	254.355	419.886	317.181	390.275
8.043	262.608	272.78	281.424	283.142	281.066	292.684	242.951	359.963	324.574	273.473	405.481	356.565	336.224	400.802	274.08	343.454	283.973	294.048	329.506	257.672	243.755	317.674	268.436	245.301	238.658	327.487	212.152	398.764	278.405	230.504	315.148	345.85	289.5	470.314	508.17	340.007	359.775	235.003	365.5	338.828	241.032	221.589	223.658	265.141	348.296	251.199	429.115	321.555	381.014
16.579	249.105	282.731	283.276	278.756	276.804	288.354	238.582	361.443	326.409	249.131	397.149	352.749	332.59	394.973	264.647	339.82	280.207	292.265	329.254	259.95	238.73	303.845	271.691	241.356	223.309	320.621	212.508	374.053	267.829	221.226	316.296	327.822	275.175	465.452	494.975	336.064	340.878	232.683	357.042	326.083	243.997	222.206	221.539	257.096	337.722	251.57	433.994	320.307	395.857
24.914	251.029	289.022	267.913	269.998	271.254	281.636	231.795	347.931	300.99	222.827	382.709	344.211	313.309	387.693	261.27	331.67	273.414	282.991	324.401	247.844	229.029	292.081	259.404	237.487	221.416	313.023	216.615	372.939	257.826	220.911	320.15	303.531	264.628	430.784	489.994	314.637	299.286	225.61	350.408	320.98	249.077	210.629	227.386	257.753	338.661	241.103	420.136	315.468	365.776
32.955	258.891	302.547	281.863	281.355	274.678	285.749	237.526	361.484	292.997	216.443	391.777	361.47	310.818	398.387	265.855	352.522	277.993	293.017	333.231	257.739	227.494	309.869	268.457	240.83	224.43	321.965	219.631	390.768	250.246	225.544	317.5	314.319	266.597	440.535	505.076	312.106	310.546	227.014	357.318	326.602	248.775	213.934	228.45	254.079	334.22	245.567	431.237	321.029	371.061
41.288	242.429	319.213	268.045	284.353	282.582	284.499	232.957	359.057	288.65	214.443	402.032	362.684	298.584	398.213	275.36	356.002	281.798	294.84	339.869	250.414	220.787	311.127	270.316	250.917	233.156	324.183	216.88	382.413	235.654	226.436	315.154	322.504	265.259	455.921	507.33	298.365	309.621	228.983	357.847	332.836	251.832	217.289	214.75	255.669	325.806	247.689	436.758	334.239	357.986
49.471	243.793	324.519	271.116	283.581	278.671	276.097	228.915	360.656	287.758	219.961	400.08	361.884	266.502	396.135	277.89	354.925	287.959	294.597	341.745	250.646	218.337	290.611	268.968	245.164	219.521	308.028	212.762	360.246	238.7	227.3	314.257	334.605	278.187	449.776	493.007	286.305	334.03	227.358	356.547	333.494	244.827	216.203		260.067	322.823	246.143	452.842	351.996	389.487
58.049	244.27	316.576	264.189	278.347	281.932	274.328	228.097	335.947	278.528	226.966	405.638	354.876	251.861	389.615	282.142	347.503	284.48	285.983	343.89	238.987	219.49	256.519	266.891	243.052	225.424	310.078	213.968	378.636	229.863	223.516	310.902	313.873	292.003	445.994	484.363	274.547	339.722	224.124	351.283	327.896	254.658	217.539	210.089	254.928	311.637	238.73	444.363	376.812	399.889
66.521	242.651	314.734	258.008	282.13	290.202	280.924	228.213	336.523	276.486	223.41	408.135	356.725	251.934	409.981	281.063	342.571	285.766	295.148	353.791	246.796	223.268	240.648	265.169	243.97	219.946	324.223	207.331	383.722	223.215	224.412	312.536	300.455	282.221	470.781	489.89	268.552	333.064	223.963	352.146	333.402	260.962	222.756	223.532	260.31	324.769	236.138	450.827	390.638	399.234
74.558	240.535	316.817	264.897	283.079	286.371	283.137	225.817	330.307	260.041	220.151	407.856	360.448	262.929	410.059	278.492	327.21	283.37	300.512	341.646	242.137	228.33	232.518	264.961	246.685	217.548	337.09	214.464	372.065	270.457	229.311	315.914	307.491	266.016	487.728	494.185	268.141	321.763	220.52	357.558	334.587	256.126	232.846	231.356	252.017	301.15	243.883	443.746	394.051	421.632
82.636	241.984	322.616	270.096	289.434	301.162	284.258	225.23	326.143	271.994	218.279	419.85	368.606	296.031	414.388	277.313	335.924	287.457	305.536	346.308	253.468	230.356	275.303	274.874	252.164	232.317	351.39	218.925	369.072	377.337	225.582	335.501	304.232	276.152	484.555	505.752	286.698	338.103	227.86	360.444	336.157	245.45	246.422	223.338	259.218	288.811	250.307	433.059	414.329	454.827
90.797	233.456	319.551	245.544	283.475	295.806	280.423	222.96	327.282	264.991	211.164	402.456	364.704	320.241	409.418	278.297	301.873	286.927	309.298	339.93	250.24	230.805	289.955	272.246	245.351	227.735	392.905	221.192	348.023	366.595	224.585	328.936	293.321	263.483	456.274	490.507	295.524	329.915	223.022	348.828	325.541	230.333	243.332	216.137	254.067	293.684	242.351	405.701	394.283	439.634
98.621	231.138	309.642	250.408	281.96	291.115	274.674	222.292	336.474	260.255	209.717	403.23	364.977	339.029	403.646	274.441	296.507	290.365	313.414	330.785	255.728	223.62	302.939	271.392	245.862	240.167	425.277	219.658	330.627	356.282	223.75	336.968	277.584	253.56	431.171	493.84	292.437	321.283	224.598	364.924	321.459	227.863	254.772	221.508	255.328	287.967	234.626	402.274	370.895	410.221
106.644	228.778	297.348	238.269	282.057	294.467	276.245	227.631	330.027	249.172	207.292	406.904	362.689	354.628	399.688	274.014	296.587	291.389	305.734	322.34	266.964	221.664	294.268	266.871	246.654	248.79	424.775	217.756	335.273	357.496	222.431	344.11	274.633	246.326	424.466	498.999	295.58	315.99	225.15	393.116	316.631	234.82	260.16	215.752	254.547	284.536	233.515	412.834	349.599	390.431
114.706	223.762	299.742	238.157	280.442	289.253	248.86	226.127	318.962	239.993	211.989	406.021	355.772	355.134	391.677	270.664	295.071	278.972	304.772	313.799	269.374	218.784	293.494	262.629	243.366	256.752	412.891	220.934	340.786	348.197	219.811	337.386	271.927	236.537	417.888	489.884	308.26	309.328	222.526	404.739	306.692	247.444	253.223	209.224	251.185	294.043	232.581	405.225	332.839	371.915
122.79	222.976	295.275	235.321	279.374	284.838	258.506	227.476	315.872	233.118	208.946	409.759	358.69	351.032	389.074	270.025	296.308	276.248	307.954	319.815	269.435	224.036	290.224	264.309	245.659	265.668	425.015	216.339	336.886	342.14	218.043	338.446	276.438	226.611	416.062	485.215	317.834	306.015	225.111	408.031	300.219	250.25	251.497	209.089	250.445	276.613	233.26	405.195	334.685	387.122
130.626	228.292	296.36	224.005	282.225	291.707	270.206	230.893	323.47	233.697	231.833	416.555	360.783	338.253	390.199	277.187	297.985	278.559	306.92	314.556	273.744	225.044	296.768	263.426	266.102	280.585	416.237	211.596	326.742	342.463	219	336.402	282.442	225.511	413.667	485.574	333.291	322.285	228.434	400.902	299.871	254.525	248.646	229.197	260.447	275.649	231.689	417.546	339.576	422.756
138.768	225.188	292.213	221.61	278.916	293.802	256.714	228.658	317.973	233.296	249.763	402.813	356.036	326.559	387.041	271.476	296.799	280.128	305.776	305.089	290.014	226.048	302.402	260.128	291.577	288.228	405.47	205.649	316.654	339.807	219.625	316.798	261.273	224.75	406.241	483.893	336.685	331.519	227.863	405.722	291.316	258.71	248.604	232.731	261.464	251.871	227.664	407.685	333.026	428.919
146.827	220.547	299.988	228.955	281.234	298.065	267.796	223.196	315.321	231.731	240.199	398.614	360.866	321.545	393.344	274.901	304.422	280.742	313.607	305.416	288.181	230.854	299.462	262.394	313.448	295.269	410.983	205.794	306.929	336.618	221.438	320.96	248.962	224.966	410.98	489.547	342.609	353.896	228.962	403.138	294.139	266.616	247.259	229.7	258.563	242.618	229.116	420.445	350.539	413.939
154.643	217.317	298.381	235.139	278.819	295.798	271.872	225.393	303.673	227.029	228.088	396.841	358.278	309.482	385.817	276.948	306.556	280.38	315.346	309.644	293.113	232.143	300.34	261.384	321.464	291.781	427.392	205.939	295.918	334.086	223.416	312.136	242.261	225.553	407.706	489.137	339.501	360.325	227.847	404.514	290.397	276.748	236.303	225.774	265.342	238.231	228.925	430.633	351.169	423.828
162.628	219.049	301.229	239.859	281.113	300.504	277.824	221.004	314.235	236.206	223.488	393.067	363.233	316.579	389.713	276.688	301.207	288.922	310.21	314.051	287.127	229.784	302.88	261.841	334.843	281.718	426.554	209.487	285.362	332.727	221.457	316.872	246.734	228.08	411.002	489.292	338.933	365.592	226.307	411.852	290.402	290.412	234.915	213.201	268.445	237.742	227.882	429.976	361.135	431.006
170.499	213.174	298.686	245.134	283.599	296.376	278.707	226.138	325.015	242.504	227.298	391.1	362.504	313.394	388.6	266.219	307.724	304.794	306.374	306.031	266.466	230.558	297.229	262.524	326.421	264.949	413.442	207.288	274.037	325.345	226.891	324.361	249.079	228.689	416.965	483.899	326.621	373.967	225.971	404.332	291.348	295.689	230.886	209.651	270.718	237.644	225.167	423.974	355.544	442.417
178.568	214.107	299.708	241.487	278.999	292.509	275.989	221.715	321.968	242.466	228.296	386.396	358.352	311.523	384.375	269.508	302.482	310.983	305.079	303.185	253.114	227.693	265.791	261.084	323.34	261.609	427.438	207.364	255.541	323.639	226.312	318.864	246.016	221.964	417.023	483.602	301.89	367.279	223.799	415.481	292.85	273.453	219.602	207.522	272.383	242.944	224.415	425.109	351.673	461.673
186.952	212.801	289.519	247.581	280.273	299.225	276.949	222.488	310.584	243.538	229.876	389.063	360.49	309.802	383.164	263.52	294.935	316.893	302.967	302.56	250.09	230.308	286.895	260.837	322.053	239.265	433.96	212.623	249.803	321.842	222.702	309.945	253.147	225.05	424.51	479.732	282.974	341.086	224.109	416.495	295.277	251.228	211.665	225.051	270.709	249.755	222.904	427.947	339.556	457.072
194.842	214.787	288.728	252.968	281.261	286.446	273.189	225.309	324.283	246.671	223.66	394.672	363.223	302.686	382.073	256.84	275.635	317.625	311.139	305.462	252.411	230.418	286.751	265.123	322.279	243.353	432.839	211.192	240.874	324.375	220.407	300.292	250.24	225.279	425.902	485.49	265.804	355.244	225.495	404.346	299.319	250.163	218.259	220.45	264.46	256.868	226.021	441.845	338.002	450.825
202.611	216.314	290.444	256.467	285.933	298.417	277.034	226.701	344.18	242.449	214.205	417.376	370.919	312.831	386.969	257.24	279.605	314.848	316.924	300.121	254.095	231.737	286.983	263.998	322.928	245.783	437.592	210.221	233.761	329.31	219.807	290.584	247.693	232.309	433.53	497.137	262.547	354.296	233.026	416.391	303.137	250.074	222.631	227.451	266.036	271.865	227.992	447.842	348.519	455.216
211.318	220.535	281.951	259.416	287.631	297.963	279.511	228.824	341.723	235.044	203.559	412.278	370.271	314.848	384.413	235.784	270.2	306.589	315.856	295.616	251.416	231.964	283.069	266.554	318.262	241.608	431.195	209.915	223.255	321.584	217.682	269.907	251.187	233.248	433.176	491.51	251.98	338.063	231.91	402.469	301.543	233.312	225.645	219.264	258	276.932	228.369	447.235	377.265	446.411
219.619	218.893	278.453	260.008	287.471	300.393	282.744	226.222	338.469	239.569		418.954	370.041	309.262	383.609	211.381	273.046	302.352	311.259	291.402	248.706	229.563	288.727	263.862	331.63	245.074	442.447	204.255	218.939	322.017	216.201	251.283	250.461	236.967	437.023	490.632	252.719	334.936	232.911	397.411	302	230.865	238.77	222.439	263.977	278.866	222.314	447.168	367.403	411.627
227.553	217.759	260.469	259.848	286.125	306.531	278.541	226.89	324.089	242.414		413.777	371.92	311.311	387.892		269.73	291.23	304.262	293.142	244.571	230.86	284.844	262.022	326.075	234.406	436.454	202.753	214.664	321.037	216.194	237.48	254.348	235.942	431.541	492.182	253.606	313.248	229.473	403.396	300.84	225.091	243.597	230.264	264.087	283.776	223.582	446.416	343.458	411.553
235.569	222.433	256.313	258.844	287.301	313.097	279.694	228.705	327.981	248.247	206.209	415.065	374.241	319.353	390.743	209.785	268.84	296.119	305.63	293.008	248.149	225.201	296.45	265.679	325.387	236.456	448.167		210.6	320.714	217.968	252.404	254.943	245.764	437.724	495.881	251.574	333.86	230.111	399.028	303.401	223.4	247.468	231.58	258.225	289.008	222.991	458.378	333.241	437.889
243.562	219.988	251.072	249.227	288.444	309.111	275.34	223.617	310.352	239.256	213.461	412.036	379.48	314.865	394.926	216.662	266.045	295.359	309.997	295.52	254.902	223.784	284.983	261.231	315.643	231.693	439.802			320.3	225.772	271.771	252.549	245.421	447.628	495.525	267.718	333.609	233.116	402.48	306.734	229.371	253.267	226.158	249.784	292.369	225.418	459.759	325.885	434.5
252.152	222.358	256.042	264.168	292.933	306.797	276.029	226.982	304.95	246.209	213.798	418.294	383.785	319.166	401.821	224.752	271.265	302.365	319.783	300.321	248.362	233.167	303.933	273.769	315.805	234.243	463.916			324.784	236.633	269.735	261.724	258.309	445.571	504.367	342.193	332.017	237.95	411.772	313.584	226.899	260.247	219.962	243.722	305.246	228.254	468.181	318.006	460.193
260.301	228.016	249.995	266.548	293.351	302.058	275.373	230.19	323.133	258.248	221.407	418.419	383.229	320.2	399.067	231.036	267.07	307.192	319.351	304.012	245.188	222.135	271.309	271.356	306.676	220.465	461.615	204.851		324.745	235.25	277.901	252.483	257.327	455.152	510.42	360.133	310.135	237.255	419.24	319.113	222.378	265.635	220.782	237.935	310.06	227.444	447.107	308.824	476.053
268.455	228.062	248.097	265.609	295.678	297.888	273.304	230.24	331.326	263.96	221	419.579	389.753	312.734	396.01	238.216	261.246	311.263	317.145	316.871	252.84	229.355	274.516	276.648	309.252	220.373	465.857	208.915	209.531	323.615	249.771	280.433	250.445	259.525	460.33	516.108	365.231	302.005	240.123	422.917	321.163	217.707	271.959	227.057	229.765	315.711	230.078	435.05	309.937	461.85
276.621	230.318	251.698	259.588	294.703	304.765	272.281	227.086	334.135	263.94	251.914	413.575	388.436	310.378	390.059	242.404	253.431	310.703	311.019	312.39	251.717	232.709	284.885	276.002	308.693	219.83	476.2	209.735	211.175	324.875	268.798	256.158	241.15	262.132	458.102	509.406	359.121	294.899	237.134	421.884	318.169	213.019	262.898	219.86	228.261	301.899	226.584	435.267	298.917	452.633
284.841	232.684	255.853	247.794	294.166	300.192	271.768	227.327	318.33	265.565	244.878	407.088	379.591	298.056	393.33	232.21	248.226	312.788	302.606	308.826	242.269	226.146	290.617	277.515	294.515	219.829	471.194		210.351	322.013	282.956	252.524	237.029	256.897	461.557	504.846	360.275	283.422	235.858	424.075	319.841	212.434	256.387	210.714	233.018	297.727	229.157	426.664	290.499	443.603
292.74	227.687	251.204	251.651	293.494	300.277	269.918	227.88	312.037	273.636	232.325	411.73	384.386	295.324	392.801		246.451	307.984	300.423	307.818	236.399	219.35	285.63	274.456	282.343	223.184	468.491		214.917	320.318	279.007	269.563	238.626	248.238	459.137	505.285	353.997	278.476	233.697	422.709	313.703	210.791	247.308	207.059	236.443	308.054	229.561	415.965	286.828	426.954
300.867	227.696	237.734	252.786	293.159	299.412	263.737	233.412	298.946	296.097	244.899	413.457	396.411	298.62	384.402		240.73	304.731	300.79	304.21	237.177	227.791	284.164	272.658	286.931	226.254	471.63		222.267	316.011	264.523	265.732	249.39	239.153	454.059	504.282	342.611	268.682	235.876	429.081	300.411	206.727	245.319	211.662	233.461	307.576	231.195	415.435	279.161	420.537
308.971	231.085	244.13	251.374	298.076	299.502	267.36	239.562	311.98	304.072	256.862	423.484	411.323	321.351	392.438		247.011	302.642	301.165	321.73	236.968	225.361	311.158	277.138	291.647	225.262	488.222	204.779	235.973	322.769	260.844	272.166	255.194	244.525	456.605	518.522	347.878	266.41	235.311	430.721	304.346	210.323	240.449	231.566	233.355	308.027	231.298	426.819	282.142	438.72
316.942	229.004	236.108	243.573	290.639	299.846	259.815	238.684	297.099	308.74	254.843	414.182	397.847	324.779	384.978		240.496	295.482	298.399	304.749	238.309	222.942	301.585	272.298	286.759	217.01	464.048		245.28	315.89	244.757	274.144	249.9	238.895	454.467	510.337	339.197	250.157	229.768	426.387	293.527	209.95	237.253	225.729	228.183	298.774	228.458	414.774	271.907	409.606
325.155	225.353	239.357	238.96	292.572	293.564	267.155	241.886	297.361	312.094	232.51	417.485	400.245	324.109	382.859		239.125	294.816	304.682	301.069	234.477	223.105	289.083	274.476	282.358	214.098	464.089	207.716	254.019	314.912	236.59	265.217	246.674	260.052	461.308	503.513	344.278	257.624	232.855	428.822	289.713	215.731	236.143	214.803	231.801	295.078	226.561	417.508	307.467	401.547
333.594	223.439	240.28	242.185	292.164	293.159	264.322	244.905	280.233	301.141	210.229	406.687	396.532	313.573	375.165		237.969	300.4	312.815	294.088	230.675	223.422	281.911	274.319	285.599	210.458	465.992		259.846	309.522	234.137	237.758	242.07	283.536	461.908	501.209	334.708	266.599	234.639	430.726	293.152	220.316	238.709	214.063	225.406	286.953	227.402	408.225	391.428	414.255
341.811	225.065	238.341	241.871	290.528	294.329	256.446	243.951	287.656	306.003	205.096	405.756	395.874	304.285	376.457		237.519	301.69	313.69	289.856	233.635	225.491	292.232	273.747	284.882	215.441	455.112		259.839	308.012	224.281	251.977	234.727	277.094	463.563	506.969	333.484	270.533	235.498	423.379	294.135	218.97	235.593	217.448	229.384	278.658	223.581	401.552	414.351	383.189
349.732	223.889	237.834	243.131	292.5	295.043	252.385	246.402	293.995	302.888		416.625	394.789	290.597	376.24		239.748	302.005	303.16	290.529	232.437	227.983	299.427	276.443	283.489	229.514	456.488		260.516	308.055	228.657	259.209	239.139	273.58	468.328	508.128	336.376	274.922	235.192	427.766	285.534	215.315	247.041	222.662	236.472	270.601	226.013	398.534	412.808	378.66
357.899	226.252	236.527	247.775	294.384	299.87	257.933	248.288	285.042	277.878	205.464	421.182	397.606	304.468	379.508		240.594	307.175	315.707	291.82	232.962	226.932	314.876	277.061	283.492	227.549	462.376	210.265	263.18	312.118	229.127	263.123	238.736	298.746	471.537	517.167	335.682	279.793	238.291	435.503	291.897	221.772	248.725	209.808	234.491	270.751	225.824	400.713	406.38	389.315
365.911	222.496	236.692	239.063	296.122	298.315	255.456	247.844	271.091	272.31		416.605	401.658	303.567	375.743		240.928	312.111	304.563	282.655	235.373	222.491	306.601	279.853	281.419	229.39	471.996		267.043	313.669	232.017	266.88	237.292	289.81	470.265	517.18	336.978	268.454	238.349	434.777	292.486	220.028	248.713	217.844	239.96	275.268	228.858	405.717	403.957	410.951
373.979	220.515	238.34	237.344	295.276	291.869	252.663	250.64	257.083	263.529		402.741	393.632	287.986	365.971		235.68	309.593	290.168	278.877	238.329	220.37	298.752	274.529	280.903	224.289	471.048		257.135	309.575	225.932	268.145	234.15	286.341	472.404	511.159	340.611	272.763	239.059	428.392	285.103	220.882	244.287	218.523	236.742	283.319	225.475	392.179	399.402	402.97
381.741	218.71		231.587	299.508	291.396	251.041	254.552	255.583	262.392	210.239	415.193	396.902	293.777	369.848		240.335	316.618	299.104	274.057	238.32	229.979	297.298	276.002	281.534	219.682	475.625		257.357	310.182	229.944	271.656	242.934	301.598	477.581	511.424	346.732	270.429	243.413	432.997	284.061	233.355	241.707	217.012	233.846	284.156	234.012	393.57	393.106	405.918
389.576	217.531		225.097	300.748	295.829	256.259	259.303	247.153	254.737	225.289	419.612	402.036	292.925	372.773		242.378	320.86	297.878	284.539	242.579	232.848	299.758	279.404	280.786	224.712	477.055		253.778	312.032	235.357	267.782	242.841	287.601	483.442	513.683	345.688	267.649	243.759	416.55	287.043	241.261	243.891	215.948	234.295	282.941	231.851	396.505	395.926	426.876
397.984	218.665		231.512	303.999	296.508	253.706	260.898	240.111	246.766	220.859	416.248	402.488	293.257	366.948		238.037	314.536	300.274	296.195	244.46	230.705	300.547	280.147	279.968	229.659	473		253.636	313.941	233.751	280.537	243.69	269.912	478.891	518.635	344.758	269.94	242.898	417.679	308.747	231.443	237.421	226.972	232.619	271.209	235.312	399.322	394.579	427.956
406.353	212.503		220.517	304.171	297.295	248.91	259.444	239.065	239.257	235.517	418.814	400.687	293.15	355.69		231.41	320.301	306.959	301.92	239.685	228.009	300.836	281.823	277.088	235.18	470.387		247.518	314.326	229.997	258.41	247.847	268.689	477.146	519.772	343.979	274.46	241.844	436.568	304.386	226.62	240.966	227.521	237.541	262.544	233.95	399.637	379.56	440.422
414.612	209.12		233.174	304.187	292.347	242.397	261.866	230.275	238.158	242.086	414.128	398.499	289.916	354.114		233.497	318.548	302.945	298.301	238.373	225.573	288.064	279.628	280.64	239.154	475.473		246.745	312.078	230.502	256.476	246.573	277.435	486.224	511.434	342.292	283.538	240.924	430.825	303.73	221.695	240.79	215.52	236.795	260.526	236.17	407.467	378.894	451.375
422.63	216.468		229.365	304.676	295.003	245.12	263.715	232.331	241.165	242.873	423.101	395.708	284.086	350.921		227.601	318.591	298.794	298.336	242.569	223.545	272.399	279.598	282.452	240.567	469.701		246.02	313.234	232.875	244.742	241.541	287.619	486.134	518.851	338.916	288.292	244.338	427.103	301.671	217.938	240.969	215.913	233.051	262.357	235.804	408.975	381.619	453.634
430.783	219.012		227.385	305.797	299.625	239.58	262.77	231.77	235.788	240.594	404.73	394.506	287.273	349.472		228.727	317.839	291.377	301.444	240.888	218.742	269.825	280.251	286.825	241.955	469.171		235.572	312.312	235.781	242.745	244.393	283.393	489.202	516.237	344.401	299.691	242.211	421.239	297.412	218.526	239.479	205.353	228.247	266.572	236.901	402.89	384.307	458.094
438.799	219.75		221.12	316.682	299.263	241.823	257.869	231.693	236.382	227.236	416.452	399.52	286.411	344.521		229.812	323.294	300.429	295.929	241.351	222.13	267.311	282.224	288.377	247.054	468.608		228.181	314.073	229.879	243.818	247.84	276.435	492.451	515.418	343.081	303.639	243.786	417.025	299.255	215.848	240.189		229.986	266.969	233.376	407.23	365.082	460.099
446.827	218.902		219.509	324.842	300.344	242.978	260.594	231.27	238.698	221.004	425.185	396.03	277.779	344.425		227.572	323.504	295.532	283.288	239.959	222.416	262.027	283.156	290.171	239.535	471.167		218.012	317.492	226.48	230.943	250.338	264.386	491.11	519.721	344.526	296.973	244.367	416.907	296.263	211.189	234.731	217.297	237.185	268.868	234.023	403.489	374.671	456.375
455.074	220.815		213.373	334	300.204	243.96	256.39	226.227	245.3	214.042	422.339	398.553	286.405	337.356		230.546	320.54	291.811	279.735	237.436	220.452	267.504	280.922	294.159	237.533	463.078		221.171	312.314	227.267	223.52	247.373	261.93	494.634	517.963	340.502	284.238	241.364	409.901	298.972	212.559	227.466	212.818	241.235	278.075	234.446	403.724	379.114	453.143
463.095	220.96		215.65	348.434	300.371	246.539	256.551	224.649	244.034	230.922	420.316	397.63	299.624	335.637		227.169	319.1	300.186	278.684	233.544	225.987	283.338	282.578	292.725	243.311	466.24		225.319	316.386	226.884	231.518	245.122	260.028	501.436	521.44	338.397	269.09	245.155	409.37	298.451	212.855	226.789	211.873	236.458	273.249	237.265	409.375	382.82	459.333
471.071	216.284		219.5	349.82	293.937	241.748	254.865	222.141	244.839	234.99	421.465	389.947	302.408	328.041		229.224	312.174	294.579	282.707	228.178	223.552	253.143	280.997	284.641	229.41	463.823		231.583	308.305	225.316	235.236	246.057	268.116	492.142	513.305	340.435	264.133	241.805	413.241	293.757	211.987	225.368	222.333	236.311	271.193	232.73	403.104	376.281	439.159
479.251	215.756		213.364	358.784	294.813	246.714	253.058	222.145	244.847	231.535	418.114	380.07	308.414	326.846		230.036	308.147	296.277	286.188	226.922	218.032	255.71	281.26	284.938	231.043	460.503		238.442	306.961	230.197	243.231	247.033	264.352	483.735	510.793	345.398	267.608	243.985	412.657	293.835	206.143	229.846	217.235	233.01	286.219	232.351	389.233	382.92	417.151
487.231	216.653		213.856	365.271	292.085	248.422	249.42	223.693	247.215	231.22	421.72	375.303	302.15	322.703		229.032	307.994	299.127	282.285	224.862	214.945	267.851	281.898	283.7	224.571	462.51		236.793	301.466	224.133	228.567	247.355	264.031	487.596	515.697	349.474	274.607	243.813	411.771	298.059	209.408	226.275	209.262	224.295	284.786	232.311	385.608	379.995	399.17
495.307	219.869		216.024	366.494	289.74	252.424	245.469	219.779	246.455	235.803	417.708	375.424	297.986	318.647		222.745	310.034	279.933	274.692	223.721	214.904	278.6	284.106	273.861	225.61	452.231		241.485	302.561	225.253	223.308	243.763	254.578	483.882	510.558	337.071	272.679	242.018	404.304	307.978	205.974	228.548		221.616	278.384	233.768	377.758	372.935	386.245
503.759	220.584		212.686	364.629	282.762	252.992	241.702	218.268	237.112	234.634	402.374	367.669	304.863	313.066		222.617	309.014	271.249	263.302	222.836	212.317	277.441	282.665	272.091	220.486	448.149		228.113	303.469	223.337	216.169	238.768	252.282	473.258	504.34	328.697	276.926	241.7	415.049	304.844	208.363	230.143	218.142	221.287	271.239	231.699	376.94	372.248	385.062
511.776	220.259		209.508	361.052	281.048	246.924	243.186	219.182	230.639	233.963	402.742	365.599	305.868	307.396		220.257	305.637	265.019	258.164	218.024	211.833	276.674	280.474	278.367	216.623	440.596		216.94	301.963	224.813	211.526	242.779	260.157	469.357	516.055	332.667	293.262	242.251	409.283	306.511	210.173	236.553	215.905	222.082	264.378	234.344	387.124	374.382	402.107
520.138	216.67			361.064	279.773	244.656	245.994	214.066	234.848	231.607	396.812	364.062	289.205	306.896		221.533	307.026	264.875	259.698	214.672	210.609	272.167	281.579	271.402	213.235	441.288		214.895	299.977	224.263	220.7	252.469	261.806	465.031	538.96	335.858	287.245	239.915	406.04	311.701	209.713	241.678	217.115	218.785	264.687	237.688	387.193	370.216	455.616
528.236	221.559			360.126	284.693	245.379	240.129	219.078	235.683	231.816	402.232	364.946	277.134	301.13		218.858	312.56	266.49	262.203	223.243	214.94	270.486	283.906	266.98	213.348	443.029		214.905	305.437	225.07	217.117	254.117	264.5	469.522	561.298	338.365	284.486	243.462	413.358	311.809	209.221	244.983	212.081	223.027	267.977	236.576	395.083	371.158	484.573
536.213	217.602			358.556	284.848	248.031	238.399	222.394	237.477	217.922	400.417	352	265.378	291.661		217.412	313.563	260.346	259.422	217.831	217.228	282.516	282.022	267.598	209.862	441.898		215.528	299.651	222.919	239.018	249.819	249.836	464.656	560.613	338.536	282.487	241.565	410.389	304.014	207.14	247.047	208.952	220.794	266.02	236.575	404.966	363.619	469.163
544.627	215.047			356.397	284.935	246.553	234.113	221.599	228.945	212.824	400.217	345.665	252.648	280.92		220.751	312.686	262.189	252.316	214.053	221.897	287.086	282.655	271.076	217.04	441.057		226.698	291.403	227.37	244.129	253.386	241.36	474.678	556.123	335.606	263.417	243.211	403.131	299.301	204.969	252.502	209.725	221.906	274.272	235.951	402.286	345.611	458.898
552.613	215.535			357.255	289.271	246.827	235.849	227.596	230.591	213.455	396.585	350.775	245.829	285.97		219.063	308.391	254.862	252.807	223.319	223.513	295.574	283.196	269.41	220.215	436.451		216.687	294.597	229.972	256.615	252.11	244.157	475.602	552.183	336.121	260.645	241.973	394.375	289.72	205.707	255.732		224.073	274.882	234.776	388.712	330.384	492.343
560.592	218.475			362.886	295.719	252.374	234.915	232.521	235.387	210.364	398.958	352.148	252.585	292.249		217.286	316.876	257.585	245.562	218.942	222.991	287.781	286.13	270.913	225.551	450.163		214.872	296.444	231.432	249.074	253.614	244.859	478.178	562.758	341.634	280.445	245.518	393.306	284.72	204.805	254.452	207.425	222.975	278.663	238.158	381.341	355.099	516.766
568.555	218.303			363.671	306.242	251.296	239.657	231.092	229.317	211.118	394.261	353.164	273.952	290.532		218.575	317.788	264.186	248.231	216.718	222.796	298.337	288.131	269.685	221.23	451.671		214.026	295.262	233.807	255.036	253.306	247.143	483.956	564.728	336.704	287.05	246.727	386.778	282.725	207.275	250.625	212.648	218.338	273.612	238.715	380.68	362.31	506.655
576.516	220.719			363.158	314.047	255.385	236.763	229.122	231.522	204.709	394.008	353.67	282.907	292.131		221.814	323.302	260.708	250.076	217.028	223.745	304.618	291.635	268.493	215.606	447.115		214.119	296.338	237.234	252.117	251.642	247.012	478.772	564.007	339.398	282.089	246.827	385.741	280.012	205.008	249.734		219.111	270.918	242.143	391.895	368.74	500.182
584.564	221.047			363.609	310.102	253.074	240.126	229.549	230.528	209.534	398.266	353.776	275.782	289.811		224.354	327.345	264.087	240.701	218.373	228.342	295.21	291.4	264.111	220.424	444.056		217.448	299.405	240.924	242.813	257.605	252.456	481.121	567.171	339.674	277.952	248.474	386.62	282.867	207.766	246.429	215.041	216.868	265.404	242.807	376.715	343.905	510.887
592.573	219.392			362.765	310.984	255.301	239.532	222.046	229.881	213.199	396.395	350.479	291.036	287.377		223.093	326.387	260.819	242.703	212.48	226.59	265.256	288.956	260.714	221.314	443.333		215.878	297.323	237.793	243.27	261.542	246.779	475.138	554.537	338.002	268.544	245.847	377.648	277.963	207.309	245	211.53	221.195	261.553	240.583	384.513	333.728	508.386
600.565	214.9			363.141	305.583	251.399	240.13	221.424	231.363	218.719	404.604	349.151	292.277	282.267		223.672	331.626	270.003	245.837	220.814	228.232	249.207	292.84	265.733	218.441	444.407		212.397	294.432	246.359	235.981	268.382	245.114	472.644	538.879	347.106	267.965	247.315	371.008	277.468	207.714	244.248	216.795	225.673	260.78	242.638	378.38	355.519	523.525
608.664	216.036			359.012	312.065	270.718	241.397	220.027	226.077	220.297	401.971	347.251	289.526	275.715		223.438	331.408	263.621	239.701	224.66	222.129	243.923	292.169	257.183	211.371	442.954		212.641	294.276	247.934	230.341	259.674	247.685	462.959	534.606	336.408	259.288	249.746	371.997	283.006	207.246	239.766	205.864	223.106	263.791	240.295	375.333	362.6	531.785
616.728	215.394			357.029	315.281	311.735	241.687	222.109	227.353	221.835	400.2	346.649	286.882	278.566		219.05	329.912	260.697	244.873	216.461	223.509	233.02	290.217	246.243	218.675	442.128		220.73	293.012	245.907	215.407	261.488	249.372	462.484	526.262	336.033	257.936	248.47	364.294	280.435	206.185	235.805		227.206	267.023	239.421	361.722	357.097	528.387
625.069	217.536			356.844	321.978	340.736	239.409	223.773	227.916	221.356	400.143	346.286	294.815	274.098		221.038	329.956	265.038	237.877	218.733	221.488	232.873	288.359	245.179	212.735	441.312		225.265	292.449	249.154	206.683	264.194	255.738	461.448	529.001	327.727	261.346	246.729	361.956	283.329	207.8	236.336	223.5	233.388	274.144	241.729	362.584	355.045	520.862
633.118	218.964			358.308	322.615	361.87	243.836	226.681	228.715	223.604	409.523	342.14	289.587	275.107		223.436	327.341	273.615	237.857	224.123	224.7	235.218	294.865	247.332	220.844	447.183		220.983	290.41	253.422	208.891	262.258	253.83	463.747	531.844	330.529	267.868	251.453	351.755	292.655	209.819	235.443	218.635	236.553	279.334	241.807	364.682	352.994	526.367
641.142	219.11			357.861	311.385	357.935	242.083	225.68	230.758	218.688	412.204	343.075	268.6	267.787		221.058	329.324	272.208	236.502	231.255	222.009	233.811	293.827	241.905	217.408	446.021		229.549	291.588	253.197	218.844	268.73	253.677	463.792	533.694	327.077	262.23	252.258	357.214	289.138	211.095	231.527	211.817	228.339	284.741	241.799	356.719	326.046	540.546
649.516	218.826			361.262	316.64	364.138	240.469	225.169	229.085	219.595	413.959	340.693	246.423	263.129		224.13	333.317	276.143	238.459	225.385	225.027	235.982	294.718	234.022	219.493	449.818		245.261	291.663	251.965	225.712	259.049	246.69	463.121	544.383	329.352	267.71	251.661	349.786	293.084	210.944	239.028	212.65	234.841	288.239	242.724	359.746	334.666	523.539
657.664	216.126			360.697	324.149	354.86	243.127	227.596	228.167	218.386	408.612	340.487	258.263	259.537		227.547	332.549	273.679	241.484	221.396	227.694	238.16	296.985	233.962	219.436	452.799		252.477	290.551	256.852	233.09	265.56	256.627	461.806	538.656	335.324	267.061	252.947	346.621	292.96	215.357	233.429	209.545	229.871	284.735	244.694	360.555	329.835	510.443
665.831	221.338			361.996	328.269	358.929	241.978	225.012	225.679	218.904	406.412	341.94	251.508	256.494		226.665	330.647	262.048	243.3	215.446	228.314	239.087	300.88	232.406	216.375	456.649		259.143	291.988	257.966	231.35	268.862	260.222	462.229	541.297	335.548	277.333	254.263	348.745	290.732	218.609	242.596	216.159	234.481	277.424	245.747	375.143	332.755	484.103
673.774	220.234			366.352	326.791	374.225	241.653	224.276	230.853	216.784	412.947	351.836	261.241	255.519		228.885	332.983	256.236	244.4	211.679	228.705	242.159	301.092	232.593	208.934	459.376		261.455	296.238	257.224	232.967	265.323	253.253	460.657	546.034	337.517	300.277	258.682	347.684	295.413	219.134	248.074	204.931	236.387	278.928	246.14	370.504	311.632	478.018
681.907	221.84			361.671	331.057	380.903	242.214	225.408	226.678	207.084	410.629	349.401	245.996	263.905		227.105	330.929	254.471	244.873	211.169	227.185	241.199	300.918	240.796		453.274		248.193	295.115	257.805	232.849	267.372	254.076	447.792	529.743	331.49	326.2	256.42	339.927	284.778	213.835	248.334	216.095	232.186	274.865	245.628	368.45	308.27	497.407
[truncated: 128 more columns]
