# Supplementary material for: Sustained store-operated calcium entry utilizing activated chromatin state leads to instability in iTregs
Source: eLife journal article supplement (doi:10.7554/elife.88874), 2023-07-04
Supplement: fig2-data2 [file 34min iTreg.xls]

## Sheet: Intensity Mean
Intensity Mean
Time [s]	Intensity Mean::1000057221	Intensity Mean::1000057222	Intensity Mean::1000057223	Intensity Mean::1000057224	Intensity Mean::1000057225	Intensity Mean::1000057226	Intensity Mean::1000057227	Intensity Mean::1000057228	Intensity Mean::1000057229	Intensity Mean::1000057230	Intensity Mean::1000057231	Intensity Mean::1000057232	Intensity Mean::1000057233	Intensity Mean::1000057234	Intensity Mean::1000057235	Intensity Mean::1000057236	Intensity Mean::1000057237	Intensity Mean::1000057238	Intensity Mean::1000057239	Intensity Mean::1000057240	Intensity Mean::1000057241	Intensity Mean::1000057242	Intensity Mean::1000057243	Intensity Mean::1000057244	Intensity Mean::1000057245	Intensity Mean::1000057246	Intensity Mean::1000057247	Intensity Mean::1000057248	Intensity Mean::1000057249	Intensity Mean::1000057250	Intensity Mean::1000057251	Intensity Mean::1000057252	Intensity Mean::1000057253	Intensity Mean::1000057254	Intensity Mean::1000057255	Intensity Mean::1000057256	Intensity Mean::1000057257	Intensity Mean::1000057258	Intensity Mean::1000057259	Intensity Mean::1000057260	Intensity Mean::1000057261	Intensity Mean::1000057262	Intensity Mean::1000057263	Intensity Mean::1000057264	Intensity Mean::1000057265	Intensity Mean::1000057266	Intensity Mean::1000057267	Intensity Mean::1000057268	Intensity Mean::1000057269
0	194.296	351.685	432.113	188.396	241.945	289.157	223.669	189.335	328.603	403.942	363.427	257.718	299.523	516.728	230.447	399.632	292.958	360.638	237.503	282.098	281.496	307.396	308.433	384.625	281.287	222.864	576.124	215.941	293.013	195.489	240.28	286.15	285.568	320.681	454.208	217.078	196.266	314.768	581.239	331.988	341.007	287.489	523.208	310.233	312.541	436.373	454.024	634.246	205.024
7.391	189.48	345.261	436.971	192.71	242.864	288.575	220.914	189.271	329.301	399.318	350.354	260.37	297.572	507.71	229.784	400.331	288.309	366.249	231.25	284.209	251.101	306.027	305.191	402.541	286.072	226.314	572.396	216.865	275.871	208.411	229.117	289.816	276.185	320.463	453.752	223.377	190.578	302.562	578.148	316.675	345.375	283.04	511.271	304.646	313.092	423.612	427.07	638.034
15.077	189.171	340.297	432.403	176.672	241.217	310.955	215.591	188.357	331.184	392.455	351.221	257.439	305.609	498.828	232.757	401.664	291.785	377.996	221.31	280.983	239.726	305.526	297.238	392.439	283.214	221.743	554.873	207.668	277.273	209.376	224.902	307.831	269.815	311.568	450.061	218.468	187.152	306.513	557.478	310.766	342.252	284.123	513.494	291.489	313.408	418.549	450.834	641.612
22.416	188.271	343.281	430.613	176.708	239.729	307.723	218.992	188.026	331.551	396.573	342.795	258.023	302.351	485.005	229.545	387.94	293.821	371.392	205.539	289.633	230.552	300.946	283.409	388.836	280.614	218.908	569.791	202.278	264.42	209.715	219.422	302.322	285.917	310.034	446.622	217.923	186.659	312.389	556.882	309.029	340.939	285.66	504.15	281.162	320.246	405.317	466.975	624.162
29.936	187.667		431.433	175.505	239.624	280.505	216.802	185.482	329.237	401.649	340.393	269.116	301.816	507.771	228.769	379.765	304.956	353.844	205.674	285.487	225.107	288.506	282.783	366.532	282.456	219.836	533.862	199.197	267.173	212.344	221.831	291.863	283.328	312.269	443.813	220.052	186.341	306.328	548.894	312.125	326.754	281.353	511.863	272.515	316.721	403.008	463.933	613.014	205.813
37.413	189.519	317.356	429.572	178.967	239.086	293.045	215.387	185.004	319.454	408.637	339.081	275.209	296.696	499.341	232.097	358.627	293.816	342.791	208.838	290.284	236.831	266.545	302.653	369.844	287.821	214.739	511.91	199.774	251.95	215.931	215.489	267.47	276.088	315.077	447.271	224.285	180.305	315.857	547.144	316.034	337.465	282.288	518.621	267.161	313.88	395.26	480.45	617.412	210.406
44.957	190.839	321.688	424.241	177.876	241.474	296.058	221.647	184.996	324.772	403.851	334.274	265.694	279.403	493.963	230.571	368.932	286.678	338.941	230.875	281.47	232.902	252.29	313.873	365.395	291.851	223.209	539.941	201.807	241.167	204.374	205.761	270.536	274.234	304.607	449.238	222.4	179.827	322.064	525.41	316.808	328.971	287.65	519.93	276.143	303.127	391.419	490.842	613.443	205.851
52.503	187.377	321.869	417.643	172.981	239.999	299.788	217.072	186.804	331.963	395.943	337.798	258.252	294.686	510.975	229.999	379.223	275.547	346.811	241.972	282.877	216.411	237.96	318.452	365.066	281.01	221.159	533.453	209.057	247.029	202.817	206.762	264.584	279.449	302.298	462.059	223.306	182.61	321.822	532.627	310.933	333.288	290.739	523.654	270.465	299.602	393.156	476.767	629.63	206.298
60.013	189.113	315.304	407.534	170.595	239.722	312.309	218.845	185.963	335.808	391.194	339.25	250.514	292.456	511.513	224.29	360.692	268.302	346.279	249.977	279.928	220.365	220.872	289.552	365.965	274.254	221.55	506.767	208.081	251.503	210.396	203.802	286.297	278.297	300.945	458.507	219.492	185.788	322.712	545.123	300.893	335.814	291.807	515.842	268.777	295.836	385.11	503.041	630.531	210.826
67.536	187.729	320.743	396.563		234.727	312.757	219.768	184.216	329.663	390.209	349.503	255.611	283.263	500.231	227.352	349.544	270.046	343.977	241.939	273.038	239.43	215.415	298.157	375.638	277.665	217.121	516.451	198.586	245.175	201.828	201.128	295.039	273.623	302.236	455.082	218.499	182.801	315.994	542.159	315.216	345.673	288.708	516.094	272.426	290.297	392.876	489.794	648.065	213.08
75.123	186.876	331.616	388.777	170.758	237.744	284.633	215.505	186.874	327.364	385.896	344.097	257.559	288.858	515.297	226.714	346.537	281.852	355.914	236.896	273.276	255.434	202.129	293.411	385.818	280.94	210.2	504.232	202.64	249.262	199.023	200.922	295.682	275.545	301.434	442.731	219.875	180.485	315.999	532.162	312.74	351.795	285.181	522.117	275.121	286.993	382.18	464.144	642.383	209.199
82.752	188.783	341.794	396.494	175.008	237.823	269.389	217.739	186.992	321.438	405.999	327.535	256.612	297.367	508.483	226.528	335.622	276.01	347.351	233.27	277.89	257.83	202.45	278.606	379.344	274.373	207.128	513.769	200.096	241.58	207.629	199.994	309.904	269.229	305.683	442.182	219.427	176.273	310.531	528.575	310.577	343.512	282.679	505.717	275.566	275.613	409.995	454.884	628.824	209.993
90.266	190.813	336.186	388.147	177.637	229.007	249.172	216.829	187.75	320.744	406.601	333.945	256.585	294.441	498.923	226.644	336.412	276.909	335.998	242.253	278.795	283.095	218.347	283.331	373.969	268.256	206.243	510.652	193.404	235.91	191.958	195.234	292.925	273.246	310.877	439.061	221.933	178.284	314.8	528.557	313.124	346.34	281.181	491.61	282.152	267.925	399.456	442.138	626.995	206.083
97.717	190.182	328.922	393.416	174.122	231.563	247.557	220.008	185.82	315.715	404.317	328.86	247.588	295.261	481.213	225.576	325.623	276.789	353.323	248.208	278.686	281.367	219.308	293.938	370.046	261.507	208.741	487.506	193.252	232.177	210.873	191.803	315.667	268.898	306.175	439.345	221.714	179.558	310.888	531.632	314.17	337.497	282.941	495.156	288.954	267.111	391.113	427.28	613.028	208.08
105.654	196.167	331.571	398.92	182.193	226.687	265.938	226.455	188.741	315.008	400.342	331.72	245.616	294.343	484.694	223.36	308.483	276.552	349.284	242.855	279.605	273.121	214.606	308.194	366.747	276.193	213.646	506.469	195.798	227.845	200.448	191.303	303.128	264.004	304.766	441.337	219.734	184.683	316.079	537.334	316.224	340.683	277.323	486.529	299.129	268.608	410.345	457.752	600.624	210.483
113.75	199.021	334.791	401.737	182.141	230.248	255.323	221.433	186.835	316.352	411.664	318.734	251.146	281.727	485.556	223.995	302.523	274.689	347.881	239.177	276.359	272.824	216.036	292.48	378.388	275.461	218.763	496.648	200.462	218.081	201.111	189.761	286.965	269.866	303.628	432.298	223.704	184.054	316.591	543.671	313.726	334.692	275.429	494.073	309.551	270.944	404.444	477.23	582.652	216.596
121.251	197.23	334.136	393.708	176.345	231.007	260.759	214.562	187.696	315.544	416.709	320.646	252.577	269.234	484.088	230.033	293.733	270.17	354.505	244.601	274.537	282.451	211.79	295.424	388.816	251.794	216.797	469.656	202.447	207.22	203.167	188.491	287.085	264.548	306.046	436.629	220.752	185.861	308.284	539.809	316.013	323.949	273.485	477.957	315.477	261.393	406.668	466.708	579.319	219.935
129.103	198.018	340.557	389.362	177.245	228.811	247.336	216.224	185.841	325.353	417.147	329.164	248.534	261.464	489.192	225.585	285.644	273.79	348.861	250.184	268.157	276.825	210.406	290.84	387.134	255.149	222.343	515.845	202.036	205.397	196.18	187.369	267.179	262.261	306.533	416.304	218.172	183.827	312.047	528.5	305.975	315.558	274.673	476.787	308.315	257.101	413.891	440.574	556.31	224.2
136.741	196.475	344.948	381.365	172.772	221.262	253.13	222.023	186.492	323.75	399.046	330.839	247.321	271.332	477.777	227.313	284.964	281.541	327.168	251.162	271.727	263.346	200.779	264.282	364.723	263.987	217.912	533.175	194.698	202.731	203.764	187.883	244.333	266.853	309.677	417.538	221.904	183.252	308.679	526.358	308.927	306.676	273.592	474.193	302.603	251.298	411.224	449.357	533.851	231.283
144.264	202.951	345.17	381.896	176.246	224.577	260.325	221.443	186.575	323.399	391.928	320.88	236.043	269.395	479.569	222.462	285.729	286.653	326.095	251.866	265.05	243.452	200.885	273.675	365.996	259.029	211.657	504.632	196.584	208.769	213.544	185.902	252.601	258.205	308.508	414.303	220.329	183.885	306.975	519.166	310.181	324.208	267.463	464.855	303.365	243.781	415.795	420.481	518.66	234.268
151.874	205.169	334.589	381.058	175.721	222.423	259.576	215.76	188.483	314.205	377.876	319.962	249.217	268.073	471.295	219.225	294.455	278.521	320.315	253.492	253.685	238.565	196.582	274.573	354.463	268.373	212.598	493.176	197.398	206.287	183.381	187.855	272.208	272.498	308.39	409.31	217.271	183.002	304.722	505.419	304.761	307.413	266.293	466.48	306.122	239.549	408.785	433.246	509.864	230.676
159.49	205.597	330.85	378.013	175.006	221.421	250.047	217.996	189.648	317.735	378.534	318.639	263.564	267.011	497.705	225.52	301.113	282.168	320.914	255.774		232.325	193.421	280.711	346.805	269.04	209.136	498.153	202.907	205.046	201.931	196.047	255.011	273.874	304.807	413.46	208.355	181.05	305.808	495.807	292.763	316.356	267.911	461.249	303.154	247.056	404.092	421.143	515.524	228.458
167.298	206.89	322.34	365.01	174.692	214.268	244.647	216.564	188.213	325.543	380.365	318.215	261.683	270.447	486.731	224.405	301.527	291.212	327.371	255.074	252.242	245.271	190.814	280.919	351.421	260.779	212.94	527.716	200.436	214.022	192.881	197.018	286.023	272.281	306.884	436.875	209.453	183.646	309.743	500.788	291.708	324.172	269.817	448.061	295.458	256.904	402.597	418.606	512.829	226.131
175.09	211.115	317.531	365.426	170.692	213.881	266.706	221.766	186.806	329.321	387.193	321.169	250.178	269.077	506.321	224.445	293.237	285.725	333.034	247.374	263.756	257.837	198.021	286.603	358.298	249.165	211.209	529.924	198.697	214.316	188.546	191.95	272.077	251.253	310.681	446.172	214.392	182.89	311.349	515.787	302.849	321.388	273.995	451.481	294.365	259.732	414.261	447.296	512.029	224.207
182.648	219.973	318.263	361.06	172.704	207.22	274.139	214.396	188.581	319.705	388.634	317.518	255.117	272.218	515.168	223.028	288.923	283.734	323.442	245.46	269.767	259.9	200.735	290.685	352.995	248.73	217.496	489.83	192.621	210.843	195.508	191.015	280.433	264.657	315.667	447.815	215.28	177.977	308.383	510.619	303.601	311.437	276.778	454.047	288.839	253.498	400.121	463.798	495.843	222.047
190.729	226.217	319.956	375.33	175.515	199.75	261.283	209.021	189.911	302.926	398.505	315.045	261.299	278.501	517.818	227.416	288.198	279.424	330.479	254.673	271.109	263.2	196.04	282.136	342.296	253.211	217.947	499.945	195.85	216.365	203.239	188.799	285.962	272.184	320.324	452.708	215.569	176.216	304.974	516.657	295.124	302.835	264.954	464.107	279.695	253.532	396.529	435.933	507.225	218.909
198.356	225.456	321.918	377.068	172.713	206.066	264.578	214.637	189.414	290.682	390.911	330.288	262.992	274.029	503.957	228.704	280.742	287.486	320.532	254.329	270.091	256.765	190.368	281.858	337.132	253.919	212.698	497.096	197.828	216.337	191.792	188.279	272.513	262.975	318.788	449.433	209.714	177.122	304.841	506.093	298.459	312.042	261.747	465.628	287.004	256.814	395.936	428.79	509.493	224.33
205.953	222.711	320.328	366.907	179.854	210.754	261.33	217.298	188.898	287.346	384.898	332.743	250.305	273.958	517.727	224.087	265.299	289.441	340.733	251.9	273.857	250.802	184.769	265.965	344.351	251.925	205.014	486.806	193.309	213.671	199.821	188.386	266.915	263.039	315.302	447.01	210.778	178.817	306.074	527.358	297.383	309.57	268.176	462.143	284.035	248.342	394.302	418.299	503.919	224.778
213.627	215.907	316.229	363.724	185.281	210.821	256.425	212.508	235.03	269.607	387.89	333.539	235.062	276.614	515.679	219.692	254.119	289.555	352.236	250.589	277.83	239.447	186.525	272.444	352.663	253.118	203.448	438.955	191.611	220.788	199.74	188.586	241.31	265.816	312.168	447.407	212.674	176.328	306.271	521.972	285.772	303.63	266.508	473.66	286.062	248.664	387.408	402.612	504.17	226.799
221.352	219.819	303.358	363.062	177.345	210.782	258.68	216.347	382.924	256.669	394.695	320.654	249.369	272.99	495.951	223.227	245.329	283.744	344.766	251.872	272.894	224.068	187.791	291.704	358.245	254.559	201.163	457.135	190.952	229.108	187.785	190.325	225.648	260.975	308.744	428.315	209.872	177.002	309.568	512.87	283.561	310.799	265.112	473.271	285.121	249.26	386.57	408.379	497.786	228.483
228.93	216.181	308.538	367.494	176.348	212.471	262.943	218.071	487.279	254.331	404.103	326.214	248.185	277.207	498.87	224.651	251.053	286.829	338.918	240.338	263.487	233.697	187.477	288.012	354.961	258.441	204.733	445.086	193.98	232.976	185.519	190.711	243.376	263.223	303.55	432.256	207.061	178.028	292.167	527.024	282.654	303.971	267.471	455.913	280.938	251.992	388.695	404.157	489.507	233.524
236.384	219.805	303.766	366.534	179.506	208.115	262.712	221.024	491.21	249.821	404.146	333.335	245.357	272.973	485.508	219.179	252.006	283.27	341.093	243.81	262.392	239.749	189.952	291.851	351.352	262.018	212.33	468.2	193.706	233.115	194.767	189.466	249.242	256.111	304.286	433.457	210.699	180.115	289.997	538.156	275.567	311.811	266.45	465.399	283.584	254.095	394.384	414.042	495.862	241.21
243.974	224.565	308.884	377.851	181.779	201.498	249.494	220.583	432.768	243.883	391.959	330.117	252.044	272.592	455.061	217.606	250.922	291.528	330.556	234.985	263.745	242.597	185.224	306.344	367.674	254.26	213.607	479.273	193.66	245.938	196.408	190.407	230.086	248.507	304.515	435.611	210.721	182.854	286.262	534.867	282.915	321.413	270.097	460.209	278.474	247.129	398.799	438.043	499.663	233.366
251.565	224.731	312.394	371.425	178.359	194.926	244.651	220.579	330.238	251.397	405.033	329.094	253.411	279.25	461.731	222.269	261.996	302.631	327.691	235.715	268.11	249.711	187.249	293.44	371.5	254.63	210.605	468.818	192.124	265.066	194.615	190.083	229.659	250.522	306.942	443.117	212.155	181.244	294.605	530.89	289.304	313.83	274.809	456.848	288.457	249.812	384.72	427.972	493.331	223.898
259.093	225.732	318.739	358.572	182.783	192.135	257.901	223.463	296.787	261.915	388.317	323.768	260.007	281.216	454.434	222.84	270.963	302.614	325.287	245.299	264.418	250.948	189.802	277.159	361.16	261.206	208.958	476.773	194.955	283.207	188.401	192.447	224.615	250.645	306.355	430.055	213.015	179.377	295.833	522.079	288.452	326.273	272.995	459.188	283.865	253.491	384.997	412.147	490.645	215.008
266.79	235.291	331.098	360.077	181.831	189.729	260.612	215.757	274.91	260.059	381.884	319.6	260.758	287.843	456.243	221.903	289.056	287.722	317.975	250.791	265.246	246.798	192.696	283.893	360.523	266.154	209.605	468.237	194.057	290.01	189.748	193.628	231.728	251.018	304.063	430.19	207.621	178.162	294.303	517.699	298.578	330.988	266.879	453.418	280.496	248.388	385.85	412.603	482.515	216.452
274.359	244.914	329.815	351.252	182.394	192.58	253.648	221.04	261.132	262.803	384.193	319.201	264.979	290.139	462.232	223.008	301.059	282.224	315.131	250.428	260.488	240.151	197.28	283.793	346.431	265.674	208.518	501.399	191.432	299.208	191.376	193.961	231.691	255.751	309.373	427.877	207.046	179.333	294.444	515.322	304.083	316.67	266.276	441.82	275.004	256.038	380.383	407.893	478.465	222.224
281.898	242.445	325.42	356.249	178.256	200.912	249.096	219.114	256.642	263.044	376.29	312.414	255.566	288.673	448.678	224.934	307.569	286.081	311.932	248.748	264.307	239.746	196.812	282.431	359.961	252.519	203.772	512.378	199.855	301.619	197.433	193.382	230.104	263.707	304.904	434.906	208.754	180.322	300.674	503.069	299.96	296.489	258.316	442.696	278.835	259.867	386.89	415.924	481.465	225.867
289.423	235.232	326.256	350.656	175.218	206.63	231.896	218.407	257.243	257.561	394.934	307.275	249.786	291.333	453.65	222.125	315.327	279.493	314.561	239.211	264.912	234.162	199.907	293.063	362.325	242.944	204.42	507.131	200.6	299.247	174.195	192.978	230.235	256.861	301.964	429.495	209.411	179.1	304.913	465.985	276.477	304.253	260.1	440.055	276.564	262.68	391.738	395.815	469.332	224.909
297.009	243.419	321.623	350.852	173.17	203.412	247.524	229.153	254.733	258.519	395.161	309.674	261.784	279.085	448.594	227.196	326.387	272.484	325.119	246.038	258.645	231.29	200.736	288.01	360.33	246.999	208.55	487.277	200.418	290.709	180.228		244.213	256.53	300.796	430.699	206.772	175.495	308.801	475.584	265.308	308.482	261.518	443.315	271.497	266.148	397.283	400.963	474.398	224.392
305.094	241.217	316.742	353.641	173.459	200.424	259.138	218.429	250.981	251.608	395.358	310.99	252.395	272.572	447.164	226.432	331.6	275.741	328.25	248.975	252.118	229.744	200.544	287.28	358.252	253.349	206.946	482.91	195.344	286.705	186.014		234.912	253.644	306.864	434.117	211.157	174.234	304.458	469.713	261.215	315.83	266.62	444.262	270.124	264.963	388.335	390.617	480.069	225.102
312.695	228.652	328.139	349.713	172.373	202.965	261.722	223.88	244.717	245.59	406.628	304.915	247.734	269.577	449.184	227.849	348.881	280.455	332.547	248.275	251.616	225.741	198.487	283.455	357.181	257.906	205.683	475.818	195.088	291.493	199.241		251.643	250.965	304.063	439.697	207.715	177.66	300.57	474.223	259.488	311.497	264.933	442.067	271.1	260.898	387.275	416.536	469.411	225.008
320.317	228.459	322.85	344.377	172.064	201.153	262.785	219.778	244.039	250.244	399.335	308.78	225.38	269.043	448.306	224.279	361.813	273.439	321.874	246.553	249.075	222.374	198.987	281.234	366.34	256.233	207.303	492.258	196.575	285.062	190.061		260.32	254.658	309.801	436.029	203.665	174.492	298.07	485.461	258.137	281.318	263.276	433.99	267.863	262.433	388.087	400.721	465.553	225.276
327.753	216.517	315.391	342.18	175.016	199.752	258.752	210.068	237.159	253.401	390.321	312.153	219.052	277.94	418.966	224.978	358.408	270.802	329.109	251.532	247.114	229.497	216.741	261.893	359.523	261.755	211.398	454.658	192.829	279.54	186.034		273.327	256.469	304.666	442.744	199.429	171.987	302.877	487.341	269.942	291.302	260.931	425.678	265.514	266.871	382.668	400.733	471.203	234.089
335.298	212.722	304.502	342.721	177.844	201.502	259.187	207.953	242.679	251.255	379.496	309.763	228.671	283.768	409.287	221.614	369.554	274.421	317.064	245.71	249.177	235.586	228.774	252.961	346.371	266.229	208.426	482.438	185.482	269.879	189.898		249.2	256.03	300.655	440.609	200.322	176.755	302.104	473.839	262.213	298.699	257.648	415.942	265.75	262.072	373.828	393.493	469.517	230.929
343.131	215.633	303.516	339.052	180.625	200.273	266.39	203.948	230.9	245.567	367.85	305.126	242.712	284.293	407.381	222.03	377.951	280.974	310.955	246.581	250.801	232.598	234.285	252.476	351.85	254.403	205.804	437.588	188.623	256.391	198.49		245.089	247.919	302.479	430.933	202.037	179.521	313.155	464.581	267.673	302.73	258.383	407.2	268.926	262.346	375.31	393.406	470.628	227.11
350.621	218.699	304.636	332.301	172.913	200.508	266.104	216.392	226.696	246.826	385.183	299.719	247.325	291.353	415.775	221.364	383.266	280.593	324.157	253.34	244.888	232.554	236.39	276.375	358.338	260.113	211.453	473.228	194.729	249.878	192.185		268.602	242.624	297.681	415.598	200.421	178.786	296.679	462.651	272.807	306.045	261.054	402.924	268.11	265.055	368.839	361.599	474.623	226.266
358.23	229.597	298.392	326.572	175.685	201.446	279.867	208.78	233.623	246.494	383.196	293.753	237.61	285.302	403.421	220.774	387.12	285.39	334.696	259.726	248.961	229.541	242.147	271.202	361.535	266.795	209.119	483.422	196.382	239.877	199.147		284.556	254.217	298.293	422.806	205.144	181.476	294.437	461.115	282.072	304.29	258.371	403.094	266.785	261.341	372.112	355.46	471.395	227.828
366.113	229.51	298.536	328.264	170.922	201.656	278.634	202.677	221.816	242.86	369.167	282.11	230.579	280.506	405.201	222.732	389.914	287.097	330.669	260.956	254.56	231.99	247.952	292.546	372.542	276.831	206.208	475.574	197.535	236.69	195.013		298.964	261.912	298.322	416.908	212.508	176.437	293.004	452.699	296.882	306.65	254.991	409.71	271.395	267.127	366.699	394.046	469.743	233.435
373.661	231.821	300.7	333.885	176.274	201.466	281.291	211.963	221.882	243.306	376.406	285.91	220.007	281.601	390.273	221.699	393.382	292.815	328.919	254.734	254.212	222.662	250.16	300.661	361.871	270.702	205.848	474.795	194.546	234.655	191.51		280.81	250.35	297.748	404.47	212.295	173.222	286.285	453.978	297.995	300.574	256.055	412.414	274.317	262.966	367.326	368.89	473.669	233.86
381.695	234.198	307.134	338.913	179.675	200.423	270.495	204.96	224.058	244.39	364.702	296.961	234.936	264.182	399.24	221.434	397.33	286.086	309.983	244.181		217.577	254.897	271.869	355.525	266.952	205.827	517.636	191.165	231.043	185.032		270.966	256.019	292.415	402.89	214.579	175.334	286.145	472.159	304.012	302.157	254.168	404.892	267.994	261.955	370.603	334.253	468.78	229.128
389.123	223.249	306.711	334.023	184.926	201.548	258.186	206.108	224.869	239.877	370.13	313.328	236.474	270.357	404.585	222.549	399.139	283.122	329.765	234.696		223.743	252.098	294.033	348.87	262.975	207.408	534.244	192.514	227.108	192.766		293.452	258.141	286.469	399.739	212.894	175.268	286.375	485.158	302.259	304.462	259.779	405.502	264.694	262.277	378.403	337.23	467.05	220.644
396.603	218.385	289.303	324.358	181.169	199.63	249.559	215.712	219.047	236.056	378.587	310.204	246.929	275.336	407.993	219.535	387.067	287.261	325.617	211.821	247.294	227.772	242.028	294.48	331.649	260.526	199.505	522.724	185.068	237.698	192.952		286.263	258.267	285.593	379.856	210.327	174.313	285.648	479.346	294.397	294.031	248.64	405.055	262.947	263.757	383.341	340.069	464.642	220.222
404.19	214.565	280.056	331.246	178.636	200.324	262.881	213.05	222.305	236.255	374.831	303.324	251.559	274.338	407.931	221.23	383.211	286.011	315.884	206.806	252.077	233.88	249.483	269.212	336.392	259.939	191.697	493.636	185.359	259.969	195.906		286.212	248.344	296.915	365.582	210.932	176.036	297.298	474.627	285.153	309.624	254.384	413.753	258.721	262.284	378.776	342.721	464.151	215.756
411.978	222.057	286.871	339.258	171.114	189.279	285.479	207.226	245.911	232.651	372.087	303.123	248.735	264.017	411.753	218.774	381.623	281.258	326.11	209.56	254.454	233.748	258.118	259.054	335.797	264.638	193.197	506.807	188.225	284.185	198.762		311.698	246.231	301.605	355.001	207.462	179.351	291.801	470.897	275.291	307.174	260.991	427.32	257.529	266.686	379.113	330.704	461.054	215.27
419.569	221.237	296.313	336.1	175.617	189.827	285.508	200.208	271.351	227.819	376.478	307.57	241.416	265.371	425.796	223.168	383.806	282.533	333.641	223.289	254.119	223.974	266.164	281.736	332.261	271.812	197.611	505.999	190.929	301.637	195.608		272.467	243.628	299.567	342.961	211.219	176.195	289.873	474.317	261	310.725	257.087	409.215	263.582	265.358	384.416	353.244	474.396	214.894
427.15	214.324	299.57	348.626	173.64	193.149	281.826	203.107	295.116	231.758	378.38	304.792	253.95	275.626	427.259	220.023	386.49	276.353	318.93	264.571	256.678	230.706	269.195	271.068	316.545	266.619	199.105	490.703	190.451	309.214	193.776		261.582	233.786	295.266	341.086	208.582	177.794	280.254	475.179	253.841	313.087	258.407	407.248	258.131	266.608	382.124	365.944	484.434	219.622
435.098	217.711	287.659	347.224	171.844	200.097	284.332	214.596	352.012	232.075	373.993	307.832	248.567	281.832	425.119	218.482	382.377	278.235	331.661	274.083	258.586	232.863	259.353	278.929	332.989	269.48	204.76	491.077	192.485	312.319	190.684		272.632	252.909	299.187	345.752	200.87	175.881	280.158	465.822	266.929	305.894	258.22	406.261	257.89	264.601	373.928	365.88	494.057	219.819
442.687	219.014	291.499	355.135	174.064	204.571	284.613	219.178	287.583	234.061	370.364	310.668	241.71	279.976	418.781	218.355	376.853	286.487	318.146	264.618	254.48	233.224	249.805	279.552	331.727	263.305	200.013	469.626	193.841	315.44	194.07		268.304	265.521	298.074	356.386	199.327	175.52	290.514	470.228	271.093	311.209	258.553	404.224	259.849	254.874	368.58	398.034	499.563	221.406
450.219	222.031	290.378	356.784	174.247	217.068	281.539	211.333	374.723	239.966	376.966	311.308	243.605	279.193	405.621	212.735	359.687	283.297	322.881	252.948		230.952	237.724	291.664	331.379	261.172	199.413	437.168	195.821	311.269	175.624		274.911	258.728	293.303	352.942	199.084	173.69	292.108	454.377	263.578	311.712	262.666	399.806	257.994	254.977	363.247	397.681	493.111	225.097
458.15	223.071	286.564	363.964	178.812	219.788	271.574	212.524	561.009	240.994	399.125	298.882	245.115	283.049	427.452	214.848	346.136	297.842	313.621	227.883		224.186	236.465	297.821	310.163	262.036	196.89	454.746	191.334	298.8	189.723		266.074	251.662	296.477	346.1	201.788	174.176	296.801	474.297	257.186	300.276	267.101	397.824	258.779	246.94	368.818	392.014	502.263	226.487
465.65	227.027	283.344	360.809	171.945	218.166	268.319	213.109	594.38	238.101	382.999	292.103	248.912	281.69	433.408	218.471	346.163	297.25	314.853	207.301		227.952	243.654	291.336	325.662	303.582	202.222	448.078	187.658	288.096	192.675		261.219	244.522	296.316	338.143	199.342	175.352	300.856	475.879	253.34	298.62	272.608	404.197	263.601	245.323	372.079	416.427	518.428	226.05
473.201	226.925	281.158	353.184	176.718	217.205	280.529	218.177	638.913	237.822	379.837	297.411	254.546	283.622	442.504	217.639	352.691	286.256	305.065	202.547		225.157	256.552	282.47	337.689	325.948	202.711	422.383	186.752	287.279	195.423		273.584	249.572	300.641	328.86	203.795	176.858	301.226	469.289	260.615	297.667	266.433	408.167	258.543	237.306	374.529	426.587	525.974	225.183
480.756	222.669	284.211	350.461	177.816	219.783	273.58	212.636	593.452	236.008	377.362	290.599	246.535	282.078	450.103	214.714	355.176	276.458	324.067	206.223		229.9	260.794	301.011	345.972	312.324	202.477	408.471	180.719	269.178	202.7		281.164	250.925	297.343	329.458	204.278	176.218	302.27	472.087	263.848	296.344	255.471	413.859	255.029	238.647	373.995	413.49	524.169	220.674
488.252	217.745	279.384	350.001	171.107	221.478	288.915	211.131	570.113	238.419	367.691	296.963	242.675	281.642	441.068	208.952	357.392	271.077	316.484	213.251		227.772	263.889	292.496	350.458	275.551	202.445	425.311	184.47	258.135	189.142		299.514	246.228	292.12	332.31	206.088	179.048	300.461	460.212	264.654	287.309	259.252	406.856	252.081	246.271	383.689	416.918	523.474	218.169
495.721	217.631	278.153	353.646	172.675	220.033	296.263	211.039	579.688	236.429	376.997	296.898	250.591	282.486	435.425	213.774	361.364	267.563	326.47	219.109		227.241	263.72	278.595	355.234	272.279	199.548	414.058	187.967	249.426	191.408		251.937	252.589	294.376	331.06	202.924	178.752	297.01	463.208	264.205	312.646	261.601	425.847	250.58	259.826	380.425	422.613	526.654	214.954
503.294	216.816	280.796	352.39	174.784	211.693	281.143	213.998	494.542	235.631	378.882	291.587	254.52	283.272	414.031	216.775	366.556	267.872	319.382	263.236		232.599	259.611	276.725	330.36	271.091	196.955	411.367	189.527	237.08	180.875		235.782	259.877	296.354	334.499	202.279	180.012	292.117	463.558	255.457	303.738	263.268	430.078	251.826	252.035	368.613	400.528	522.268	217.152
510.702	222.236	276.26	349.399	174.942	204.29	276.242	210.345	401.654	237.09	376.732	290.281	250.761	284.197	410.855	219.171	362.421	271.733	322.334	270.61		236.356	261.177	276.65	320.756	270.453	195.003	397.906	185.416	224.519	180.825		233.887	257.251	296.757	343.533	201.369	179.972	282.119	458.062	256.326	299.659	255.657	434.385	258.546	267.874	364.182	393.053	520.881	214.642
518.455	227.37	279.526	356.729	174.304	194.517	275.93	207.507	329.169	234.537	376.038	290.964	251.853	277.746	426.817	222.011	359.843	269.766	328.293	257.007		237.684	259.273	271.365	313.682	265.264	201.177	438.344	186.979	221.59	180.355		236.987	258.565	291.26	347.783	202.955	175.513	275.972	452.716	257.045	297.705	253.712	428.219	253.263	259.768	366.681	400.034	527.419	212.899
525.951	237.159	280.087	354.026	173.315	191.557	270.101	208.859	296.878	234.485	365.18	291.798	248.561	279.608	436.221	215.599	354.607	262.836	337.058	248.965		233.556	250.913	265.192	319.955	290.461	200.182	451.575	187.363	228.991	191.79		225.035	257.06	290.493	353.016	202.262	174.101	286.936	468.116	261.755	311.996	257.931	421.101	249.502	254.335	357.312	391.911	531.1	220.685
533.458	236.23	287.075	345.885	175.048	192.526	264.115	206.74	278.939	228.112	365.957	290.602	245.172	277	446.694	215.182	355.25	256.391	328.76	237.485		231.546	246.716	290.855	340.509	305.986	205.342	485.191	189.327	242.458	188.24		230.554	252.339	286.558	344.211	197.903	176.48	277.988	481.214	261.518	313.238	256.962	420.265	249.661	260.02	361.328	406.725	531.78	221.592
540.924	219.744	290.673	328.119	173.178	195.479	271.673	201.765	404.189	227.524	364.004	290.07	245.045	267.299	448.572	213.511	350.66	259.235	320.25	217.904		227.41	234.604	284.098	340.206	292.265	204.044	496.303	189.203	245.067	181.983		240.752	248.89	283.336	340.834	195.693	179.654	282.949	482.44	259.135	310.378	258.088	421.077	244.697	267.365	361.93	406.457	532.547	225.437
548.523	221.483	287.04	326.944	171.898	193.447	266.016	206.19	378.271	232.235	363.794	296.516	244.308	265.704	458.932	214.177	353.272	261.477	303.184	239.072		220.322	209.416	275.997	324.357	263.647	200.896	484.609	186.345	253.429	191.79		218.474	250.668	292.214	349.784	195.754	178.415	283.911	476.281	260.825	303.906	259.687	409.391	248.437	273.011	356.412	416.71	531.912	220.054
556.128	220.888	287.387	331.578	170.806	189.994	237.692	204.885	335.856	230.739	375.481	301.922	242.999	267.179	459.775	213.575	344.818	268.276	297.363	258.749		219.158	204.36	280.48	320.861	220.236	200.638	467.178	188.703	253.584	189.256		231.023	244.1	297.632	352.115	197.569	180.676	279.04	491.867	262.75	297.457	261.687	400.821	249.535	272.244	372.76	407.223	542.297	220.728
563.713	215.162	284.018	329.25		184.219	230.857	209.914	309.619	227.914	364.845	293.24	236.156	272.199	463.465	215.105	351.971	272.022	290.402	256.666		215.119	207.576	271.615	314.713	215.049	204.837	457.776	189.457	257.715	174.353		249.555	254.736	297.872	356.69	199.456	178.188	277.652	488.442	260.481	292.378	262.679	402.979	252.616	272.208	359.071	391.553	543.783	218.621
571.444	223.821	283.541	336.188		184.854	224.993	202.778	289.798	231.66	351.395	294.757	230.257	264.46	464.518	212.634	358.219	279.918	300.88	238.788		215.197	210.511	273.457	293.252	224.543	202.705	463.946	187.811	250.078	183.13		256.914	245.405	289.647	358.213	197.765	177.204	275.442	488.352	260.864	291.487	260.835	393.335	251.709	277.947	353.72	379.078	539.634	214.161
578.961	233.99	281.618	342.79	172.042	186.116	236.896	200.307	268.893	227.926	350.828	294.575	233.955	267.246	469.465	210.396	356.68	285.256	306.613	210.663		215.968	226.567	263.088	289.42	250.486	202.031	464.445	190.808	241.232	176.303		251.667	238.165	286.191	351.895	203.682	175.903	275.382	474.348	252.892	290.229	260.878	391.778	252.287	275.12	366.898	405.49	529.916	209.144
586.462	234.752	280.514	354.152	176.273	190.316	270.232	212.155	259.788	232.385	349.379	290.874	230.882	267.101	476.39	209.394	356.812	287.902	315.351	202.815		220.158	241.833	249.205	317.992	258.211	203.965	450.841	194.642	244.691	189.648		250.81	240.271	283.024	357.327	206.4	176.057	274.412	468.622	248.209	269.971	262.821	392.482	257.241	270.389	374.544	408.84	532.628	212.695
594.007	232.014	278.065	356.439	172.316	194.678	286.583	208.749	248.627	233.59	360.733	293.205	232.48	263.872	471.268	215.382	357.013	290.009	320.438	203.687		223.86	239.172	257.462	349.091	258.931	200.851	449.592	192.185	247.143	185.823		239.269	251.193	288.195	373.602	205.419	175.329	272.847	474.113	246.613	263.307	260.871	388.527	250.437	258.599	386.827	379.672	535.762	209.729
601.527	221.505	276.648	357.203	171.467	192.022	270.079	200.642	247.661	227.431	368.035	295.695	216.535	260.94	467.395	211.562	357.608	299.575	326.612	201.264		221.338	243.032	261.701	345.371	247.785	196.066	425.534	189.052	245.654	186.438		254.818	262.174	283.204	382.228	201.619	176.444	280.515	480.813	246.332	262.886	257.816	388.858	248.431	243.271	381.954	403.386	525.137	210.538
609.182	212.943	273.26	351.86	171.055	196.398	256.243	200.682	241.73	232.011	364.795	294.193	222.461	252.553	468.783	209.118	353.859	292.949	318.963	207.718		221.62	243.073	285.697	348.446	248.765	201.212	432.819	187.726	241.829	189.912		248.662	253.334	279.938	391.746	200.226	174.812	287.613	481.699	250.587	267.604	255.425	393.807	243.786	239.731	383.02	396.005	522.744	209.719
616.715	205.911	273.119	361.054	170.874	203.533	274.204	197.141	237.551	228.169	347.133	292.344	240.626	265.265	479.092	216.16	359.138	288.3	327.379	239.827		220.818	251.847	275.757	334.665	257.31	202.615	404.59	182.601	256.603	185.006		248.878	253.971	290.751	381.664	203.09	174.389	292.755	470.163	249.227	260.598	259.443	400.56	239.13	237.875	378.638	373.458	516.862	211.995
624.411	217.748	262.511	342.854	170.789	203.774	268.23	200.144	241.076	226.168	323.135	289.036	244.08	265.681	492.618	214.876	362.046	288.006	334.222	264.336		221.404	266.655	281.881	342.734	261.631	200.048	414.535	185.505	280.237	178.638		270.041	251.051	295.923	383.136	203.303	175.074	289.979	465.21	245.39	277.097	262.135	400.133	235.148	243.027	373.881	351.119	512.284	217.589
[truncated: 206 more columns]
