# Supplementary material for: Sustained store-operated calcium entry utilizing activated chromatin state leads to instability in iTregs
Source: eLife journal article supplement (doi:10.7554/elife.88874), 2023-07-04
Supplement: fig2-data2 [file 34min Tconv.xls]

## Sheet: Intensity Mean
Intensity Mean
Time [s]	Intensity Mean::1000101396	Intensity Mean::1000101397	Intensity Mean::1000101398	Intensity Mean::1000101399	Intensity Mean::1000101400	Intensity Mean::1000101401	Intensity Mean::1000101402	Intensity Mean::1000101403	Intensity Mean::1000101404	Intensity Mean::1000101405	Intensity Mean::1000101406	Intensity Mean::1000101407	Intensity Mean::1000101408	Intensity Mean::1000101409	Intensity Mean::1000101410	Intensity Mean::1000101411	Intensity Mean::1000101412	Intensity Mean::1000101413	Intensity Mean::1000101414	Intensity Mean::1000101415	Intensity Mean::1000101416	Intensity Mean::1000101417	Intensity Mean::1000101418	Intensity Mean::1000101419	Intensity Mean::1000101420	Intensity Mean::1000101421	Intensity Mean::1000101422	Intensity Mean::1000101423	Intensity Mean::1000101424	Intensity Mean::1000101425	Intensity Mean::1000101426	Intensity Mean::1000101427	Intensity Mean::1000101428	Intensity Mean::1000101429	Intensity Mean::1000101430	Intensity Mean::1000101431	Intensity Mean::1000101432	Intensity Mean::1000101433	Intensity Mean::1000101434	Intensity Mean::1000101435	Intensity Mean::1000101436	Intensity Mean::1000101437	Intensity Mean::1000101438	Intensity Mean::1000101439	Intensity Mean::1000101440	Intensity Mean::1000101441	Intensity Mean::1000101442	Intensity Mean::1000101443	Intensity Mean::1000101444
0	342.413	416.444	325.408	329.348	462.637	367.401	473.72	404.149	305.397	342.789	326.705	387.416	298.206	318.146	260.513	429.383	331.266	351.933	327.834	325.22	268.877	328.349	302.224	342.246	325.32	343.393	369.161	344.892	278.444	305.555	342.847	401.453	326.691	465.036	318.361	280.853	283.896	337.733	416.587	407.411	297.808	257.24	356.981	368.753	400.073	334.216	317.265	387.628	346.271
7.481	348.307	406.323	323.937	335.744	449.789	363.935	463.536	375.7	286.512	330.911	326.003	397.445	298.402	313.731	250.688	428.279	343.931	338.29	325.637	300.426	267.214	335.132	294.803	335.253	330.908	340.331	342.896	326.973	268.035	293.902	329.08	400.248	346.83	453.555	315.206	276.172	280.34	354.243	400.978	418.997	304.22	262.053	339.983	335.74	406.193	330.101	323.824	401.653	344.554
14.911	344.452	401.843	312.373	343.946	456.039	340.902	446.176	383.043	296.479	325.263	349.412	399.859	295.581	307.954	248.61	426.492	339.826	340.439	349.474	299.271	267.554	344.37	283.15	326.444	314.305	331.335	348.874	322.107	286.304	290.21	313.938	419.158	345.022	459.459	295.734	281.086	284.007	351.758	396.608	406.936	305.759	263.704	324.804	325.486	414.869	327.548	340.797	394.023	352.084
22.576	336.891	405.751	298.835	350.734	471.341	338.691	466.359	372.28	294.672	320.975	336.373	397.157	300.115	318.731	262.287	427.721	329.547	344.482	335.476	295.387	268.171	356.347	272.681	320.004	318.992	327.907	365.695	320.944	286.051	287.965	311.149	417.754	341.646	468.757	299.854	277.273	290.054	337.123	406.893	412.557	297.448	270.937	336.245	341.426	402.124	334.235	338.479	394.757	362.017
29.975	351.027	411.5	297.25	354.715	455.188	358.41	496.159	370.518	304.36	323.346	334.256	387.213	279.282	316.745	267.079	429	320.801	345.939	327.473	291.021	267.227	346.912	282.114	330.844	310.122	338.979	365.812	326.307	278.851	297.185	300.721	427.403	329.875	475.112	292.949	278.036	287.251	349.275	360.48	450.335	275.093	270.816	329.543	336.743	410.444	334.965	330.338	381.015	369.608
37.5	351.552	419.998	303.139	362.155	459.639	362.824	489.301	365.512	306.601	323.461	326.919	391.055	271.731	316.197	260.913	415.812	335.535	341.712	329.485	284.072	265.12	330.085	276.077	326.255	298.605	340.696	343.358	325.385	285.593	299.385	325.723	410.059	338.186	465.582	293.462	274.617	292.626	336.57	380.754	401.858	266.677	265.186	325.126	325.116	387.031	307.745	327.577	377.449	370.121
44.976	332.617	418.55	301.734	371.846	470.954	356.488	481.369	381.398	293.574	328.388	319.787	386.43	268.273	315.823	256.105	413.866	319.13	330.426	314.281	276.835	264.043	333.238	270.122	321.47	306.716	342.518	350.908	316.973	281.323	287.105	334.026	388.797	340.484	450.953	280.449	277.097	296.634	350.404	387.604	389.221	260.944	273.905	319.32	344.584	411.287	312.328	312.954	376.768	358.986
52.593	338.465	410.534	300.421	368.55	460.565	353.726	497.893	372.079	285.994	335.919	319.387	399.917	269.409	321.672	260.858	428.062	334.78	324.857	338.438	272.864	266.437	331.011	275.79	321.278	301.518	339.123	356	298.349	282.731	287.573	294.057	390.714	340.388	444.941	269.767	276.522	299.401	345.885	391.997	412.71	263.912	268.665	313.436	349.891	424.315	320.447	315.868	382.189	356.552
60.088	337.084	397.126	302.757	368.895	420.642	347.161	452.211	383.008	288.863	333.639	318.708	400.993	264.814	307.485	250.394	404.066	330.325	338.682	328.146	269.386	264.686	337.72	278.037	316.759	298.115	340.534	349.799	289.295	279.739	283.422	307.661	393.585	367.55	435.198	282.023	273.215	306.969	348.627	391.653	421.294	273.432	266.182	344.742	338.825	404.342	314.381	314.086	387.595	349.458
67.545	326.284	396.012	294.97	365.201	417.509	335.979	461.361	392.584	304.322	344	326.484	400.34	275.553	306.822	232.165	387.499	314.161	337.76	332.248	263.964	262.371	339.234	274.815	333.328	302.647	338.503	356.811	290.559	284.943	283.281	306.29	393.605	361.953	430.189	266.312	270.222	291.157	327.318	379.693	419.851	274.403	258.518	320.379	348.557	399.772	318.571	314.796	383.294	346.474
75.192	322.771	382.317	302.103	363.916	415.347	359.337	461.23	368.919	299.14	329.851	339.442	399.412	265.178	320.052	240.894	415.147	306.473	328.678	323.621	257.339	260.784	332.388	266.125	325.059	315.209	331.711	352.546	282.478	293.326	282.643	315.188	391.044	345.337	440.086	272.472	271.966	307.563	323.519	388.37	411.041	284.333	255.123	303.456	350.707	390.338	318.268	326.899	391.063	327.172
82.699	329.707	382.838	308.051	364.843	438.741	349.99	461.981	362.654	288.801	328.478	336.797	394.576	259.232	312.307	247.928	406.693	308.784	325.401	323.087	253.75	261.407	333.072	260.638	310.372	307.108	329.646	355.435	307.119	287.196	286.762	294.386	388.671	365.971	426.851	272.276	268.133	300.395	325.745	406.721	390.72	272.842	259.146	295.071	319.025	394.892	311.507	311.498	383.395	327.025
90.376	326.029	372.977	316.206	360.788	427.154	349.481	501.847	351.508	280.123	324.67	330.186	387.571	269.585	305.819	243.77	402.423	312.723	327.92	330.633	254.5	259.479	331.607	252.533	306.616	309.354	341.664	340.55	299.105	278.86	288.84	289.42	408.471	358.668	420.654	279.528	274.904	317.938	329.937	405.89	395.019	287.262	243.878	308.794	313.604	384.82	311.849	309.96	357.678	320.963
97.801	319.47	360.06	316.844	376.757	405.17	346.071	475.465	369.418	284.377	324.753	313.929	390.898	271.153	299.71	249.303	419.15	312.728	315.502	329.015	254.47	262.037	336.475	262.421	313.12	312.447	348.626	323.638	303.677	258.491	292.18	297.557	405.487	352.985	408.502	269.442	279.642	324.534	326.944	410.654	394.29	290.101	245.924	314.947	315.904	382.916	299.914	305.549	349.739	325.273
105.494	308.552	351.36	310.817	373.93	410.888	344.23	500.439	348.601	302.871	314.038	317.122	382.305	293.589	301.253	257.021	391.925	303.826	331.295	318.208	263.194	258.162	336.073	267.141	303.865	303.035	340.772	347.53	302.443	263.954	309.294	339.553	405.607	339.472	398.585	258.929	288.054	318.906	311.801	410.896	403.85	284.456	253.034	336.259	328.308	371.842	303.848	307.25	366.27	331.723
113.283	311.429	340.781	303.795	363.469	412.541	333.319	490.901	336.01	311.405	304.997	321.413	372.728	286.336	305.182	263.937	398.273	304.443	317.098	310.784	262.685	258.262	336.027	262.5	309.847	295.735	340.045	332.18	293.908	258.146	304.226	292.657	396.173	341.746	393.865	263.838	288.326	314.744	329.699	399.399	380.423	282.975	253.627	346.17	345.707	373.759	303.898	325.037	370.854	329.411
121.331	299.024	361.042	306.172	366	408.57	325.248	481.822	327.938	321.49	312.633	313.185	371.725	274.008	308.561	273.426	388.581	308.232	324.007	318.289	256.227	258.167	341.455	270.18	302.63	289.652	325.483	332.979	302.114	261.799	294.369	292.949	393.241	341.773	370.939	263.285	282.944	325.615	328.631	389.147	377.913	294.46	256.38	365.237	338.416	373.571	283.982	320.385	369.858	316.114
128.869	298.388	358.743	316.472	364.331	398.994	334.336	481.63	321.672	304.819	308.613	310.637	378.783	272.319	306.251	281.933	390.733	309.791	324.564	307.207	256.447	254.863	346.754	266.028	299.502	280.321	334.058	347.252	305.844	265.21	301.21	290.122	381.587	330.818	400.69	256.294	263.147	314.227	337.449	374.664	369.006	294.392	252.495	346.848	327.301	373.525	285.551	311.73	368.498	324.617
136.675	299.912	359.763	319.348	376.008	409.906	352.014	472.62	334.706	281.206	309.061	294.925	374.48	267.98	306.9	291.5	394.456	298.019	319.952	293.034	265.422	255.944	338.131	293.031	299.855	274.63	326.262	337.59	312.132	249.852	299.383	286.815	389.7	324.567	393.652	269.149	263.576	310.652	350.752	380.149	384.014	288.714	256.615	315.03	321.933	371.202	282.493	301.846	377.018	320.789
144.331	317.211	359.126	314.204	367.905	382.265	348.57	460.95	352.522	283.987	306.441	277.753	371.892	271.455	304.422	304.915	390.922	294.852	327.344	301.077	261.075	254.659	332.684	271.863	298.07	270.853	328.777	335.33	314.844	247.016	299.921	307.751	391.984	334.476	378.988	261.681	273.325	308.741	334.258	366.453	386.415	277.43	244.952	299.997	330.238	370.113	284.383	313.76	364.827	315.378
151.913	309.251	359.881	311.858	366.547	401.491	347.017	455.272	336.496	298.412	306.289	286.584	356.758	277.725	307.632	309.415	391.364	289.576	327.567	324.386	263.459	255.396	322.089	266.585	301.166	265.803	338.982	319.579	310.068	241.965	302.375	307.796	390.835	364.602	387.79	263.364	284.19	314.905	333.389	371.629	380.655	276.211	238.671	304.11	328.839	358.668	284.234	318.717	373.109	299.713
159.548	310.385	367.073	310.326	353.468	399.229	346.738	456.89	337.077	294.955	285.446	286.777	354.465	270.279	301.159	318.787	389.649	291.55	330.148	312.522	258.906	254.768	320.87	269.567	297.854	264.973	333.108	307.07	309.467	245.137	295.016	292.636	389.363	355.732	384.785	275.986	284.595	302.752	330.025	379.605	380.483	263.241	240.055	304.344	322.955	355.744	264.694	319.159	365.683	291.486
167.281	301.845	353.013	309.062	353.412	409.327	342.221	453.631	341.784	293.63	295.741	299.739	351.869	260.181	303.435	320.881	387.026	306.588	332.447	301.248	258.316	251.372	315.315	269.635	305.572	278.153	334.364	306.72	297.511	278.012	293.828	303.002	388.64	337.879	397.303	277.182	292.156	301.66	314.779	394.143	377.932	268.416	226.292	305.063	315.254	343.944	256.28	314.403	363.643	284.554
175.135	314.348	361.469	293.257	357.711	404.124	334.25	483.418	333.953	301.47	282.48	282.271	363.595	268.561	302.62	320.386	391.178	314.667	326.478	309.395	258.361	254.909	315.427	263.744	283.714	264.262	326.086	292.762	287.553	291.575	284.978	298.166	372.943	337.035	389.545	268.837	294.828	303.954	334.797	388.05	378.617	276.161	229.851	297.266	312.777	358.247	262.56	302.783	375.12	279.784
182.716	315.796	361.016	302.645	342.347	428.861	326.628	491.657	359.264	290.107	298.223	278.895	369.408	277.314	305.036	316.793	395.305	317.469	326.146	299.439	252.974	253.411	320.379	272.611	263.818	275.621	307.482	299.523	278.23	299.32	279.706	303.658	374.623	339.896	377.119	272.543	290.017	322.501	332.269	369.05	381.361	276.603	233.325	312.55	316.83	358.125	260.488	320.73	383.221	296.329
190.264	294.539	366.258	312.713	346.765	422.038	329.494	488.455	389.083	281.723	299.932	285.829	352.836	274.672	298.214	315	391.807	307.328	319.735	301.938	253.283	254.228	320.5	267.598	272.192	284.263	312.056	294.119	288.09	297.367	278.696	302.655	371.266	340.036	386.728	280.283	279.206	355.37	322.477	371.184	385.983	281.423	233.271	342.179	329.042	359.613	253.983	313.594	383.621	298.732
198.354	290.049	370.679	305.22	336.047	406.225	339.199	458.945	375.429	293.994	286.728	299.343	350.373	276.947	295.795	317.638	384.484	306.214	345.228	302.295	292.718	253.7	319.19	260.652	279.169	278.12	331.963	319.752	293.158	295.045	262.093	301.185	372.791	318.669	390.682	272.779	278.253	369.247	313.801	347.245	383.008	279.677	236.259	350.846	330.037	347.888	276.115	326.163	392.852	305.061
206.063	290.812	371.125	322.022	340.482	414.839	340.615	453.398	354.062	283.478	299.105	300.314	350.926	279.366	296.094	317.015	381.645	316.705	334.148	284.025	331.193	253.244	332.754	270.544	271.061	263.848	329.963	309.703	286.844	292.494	275.551	269.237	361.481	312.155	363.117	292.747	280.225	357.511	314.1	360.423	393.057	274.296	235.161	332.154	319.874	342.506	275.5	301.777	388.168	296.817
213.626	294.242	368.172	309.466	328.121	412.605	332.719	438.235	358.302	284.964	298.946	286.653	350.032	271.668	290.146	310.804	364.336	299.627	334.514	269.55	345.258	252.615	336.827	274.913	284.391	267.851	327.832	314.941	284.217	287.577	256.93	286.378	342.653	309.477	346.666	271.309	273.914	340.556	303.544	363.515	375.618	278.181	237.084	310.358	331.798	338.029	265.901	309.301	374.08	299.184
221.463	289.389	374.088	304.048	320.095	411.233	327.993	462.279	356.869	286.287	307.039	278.791	344.614	275.336	288.496	304.745	372.971	296.717	334.374	302.673	333.678	249.312	328.037	261.473	283.577	258.628	338.549	334.031	291.377	283.565	241.973	270.424	353.392	306.896	342.858	250.65	274.086	335.22	312.053	369.851	366.428	270.879		309.264	313.989	347.133	267.467	314.612	364.209	297.048
228.977	288.552	354.688	309.04	310.817	439.852	329.322	463.586	362.099	282.52	309.59	278.816	344.296	253.535	290.613	303.106	366.047	304.877	338.513	301.02	335.743	249.937	323.099	263.842	278.163	248.213	326.648	314.91	284.996	269.593	243.489	296.539	354.955	309.874	350.098	267.168	270.959	337.157	309.656	344.306	355.168	284.526	233.608	284.051	305.879	335.744	259.622	305.687	368.515	302.591
236.507	288.325	366.756	300.972	323.738	404.581	331.452	456.094	365.292	276.113	292.906	286.103	338.205	260.555	297.608	292.413	354.891	298.47	356.856	293.291	329.799	252.845	324.196	258.042	255.761	251.788	322.801	289.106	292.982	272.286	242.227	294.693	352.072	327.749	318.794	252.546	262.811	329.529	323.827	348.428	371.325	287.399	233.321	274.908	309.659	335.342	269.701	316.429	364.561	308.655
244.052	278.442	369.639	304.789	327.73	404.476	329.496	457.54	340.721	283.67	305.184	287.015	339.558	266.701	292.182	278.921	349.985	298.81	350.274	294.401	337.669	253.301	317.036	255.86	242.638	246.78	324.886	331.137	287.186	268.435	232.056	286.748	329.361	315.567	347.153	239.85	260.11	318.556	327.466	337.382	361.354	287.404	238.753	288.393	308.004	332.103	282.589	311.594	369.505	308.062
251.594	289.329	363.495	308.012	325.285	408.839	327.963	450.535	325.229	282.687	307.192	288.521	340.45	275.096	297.775	289.85	360.404	287.821	343.207	296.471	335.569	249.352	310.688	261.631	257.614	254.911	334.385	333.007	285.85	274.745	247.833	302.125	333.254	300.72	349.515	240.819	263.758	313.68	317.416	330.77	381.315	273.5	240.03	284.463	301.691	332.627	288.375	316.294	359.398	316.506
259.175	290.089	364.544	304.582	326.913	403.442	318.173	451.089	316.894	284.294	311.388	285.857	339.697	276.071	298.003	272.656	356.948	280.515	347.431	298.113	328.267	247.025	304.252	255.873	270.112	258.926	329.221	323.581	278.37	269.03	270.61	297.386	328.71	299.668	346.294	233.987	266.034	322.209	279.325	317.127	369.53	259.907	231.519	272.025	295.411	338.532	271.373	322.449	349.141	299.643
266.798	297.369	358.836	297.857	313.077	389.775	328.165	464.426	333.63	279.199	312.726	297.83	348.211	288.113	302.918	268.905	349.092	276.931	348.104	303.554	337.696	249.735	306.711	259.082	265.678	253.729	329.296	328.211	279.963	263.637	299.585	303.002	344.827	323.339	322.903	242.896	274.917	305.728	288.613	326.262	357.11	264.767	231.5	273.301	297.213	335.59	258.898	323.135	356.116	307.082
274.453	283.729	353.288	281.477	326.596	372.171	333.2	460.739	329.504	266.228	300.229	315.904	359.3	285.796	304.687	282.436	348.458	282.742	339.292	290.077	338.599	251.493	298.078	253.092	257.164	255.039	332.415	334.372	289.078	249.245	312.196	294.954	339.517	330.087	331.155	267.255	277.454	300.84	289.056	326.379	351.947	275.874	238.949	267.55	302.36	333.266	254.765	313.446	370.09	313.745
282.016	282.621	346.049	299.712	324.899	392.218	322.353	445.888	315.193	266.647	293.129	315.526	349.162	278.668	305.237	283.84	351.321	291.261	340.569	286.772	329.049	251.99	314.598	270.708	252.903	254.629	337.275	329.244	305.652	245.633	302.912	277.263	328.389	308.964	323.706	258.932	272.202	294.425	271.679	307.224	351.254	262.584	238.221	259.239	301.304	332.951	265.616	316.766	358.494	301.148
289.482	284.907	348.776	295.138	323.091	370.06	320.625	451.268	296.897	277.244	292.687	311.704	350.454	277.694	304.712	270.253	356.348	290.472	313.909	289.74	327.658	249.679	322.52	249.248	253.507	256.791	331.244	332.406	277.205	239.461	282.14	285.15	329.943	315.624	370.611	256.848	270.667	290.728	319.314	306.682	343.067	251.08	235.007	266.357	294.768	335.662	265.649	314.63	352.028	303.368
297.095	265.914	345.702	299.794	321.301	362.823	329.018	455.791	286.565	282.229	283.592	287.688	339.447	273.743	310.016	270.882	363.079	274.957	326.476	293.194	326.151	249.723	317.997	259.608	248.186	254.236	322.371	323.963	277.818	234.518	273.818	273.73	317.072	311.895	357.691	262.015	265.397	296.177	318.467	306.363	347.438	250.265	223.055	272.486	287.486	325.199	263.476	301.201	334.812	301.047
304.655	268.671	347.743	289.37	322.81	374.627	322.768	436.118	308.145	289.504	283.462	290.663	344.308	268.883	309.455	270.985	369.118	274.456	318.629	282.908	320.162	249.636	320.699	254.285	252.243	254.324	325.048	299.955	281.98	230.645	261.25	281.574	313.33	316.646	343.349	270.675	266.269	310.048	295.61	307.801	355.904	257.731		287.674	280.949	324.927	268.925	309.254	327.919	305.787
312.738	286.825	339.387	297.902	308.494	373.755	317.859	438.94	295.165	302.1	288.132	291.415	335.501	258.304	308.228	272.564	351.262	273.066	321.31	272.697	320.808	244.563	298.3	260.064	246.335	248.819	325.456	293.402	293.457	237.364	246.142	282.082	307.751	314.046	363.629	272.67	268.771	316.676	287.29	311.775	349.905	263.952	222.8	315.617	286.178	318.04	273.91	307.911	331.017	292.746
320.232	264.543	333.876	282.039	312.138	370.393	326.422	446.245	303.458	280.517	269.489	288.065	328.693	254.226	306.889	260.482	348.23	262.071	323.215	262.805	315.567	247.143	297.589	241.606	252.748	248.942	320.259	302.791	288.303	240.827	246.225	285.406	304.759	308.545	353.115	278.634	264.205	320.89	286.108	311.868	361.571	277.565	227.344	300.124	288.739	321.568	274.322	305.799	324.703	281.39
327.928	274.134	337.453	277.092	314.714	362.226	318.822	434.156	332.916	282.205	288.475	304.382	327.321	253.029	302.114	253.328	362.866	264.78	320.82	271.519	311.788	243.659	293.632	254.96	244.13	245.031	323.218	305.729	290.252	235.386	241.325	294.362	306.755	320.248	347.398	270.534	264.302	301.324	281.263	317.069	352.521	302.797		303.043	284.568	314.306	277.233	294.746	327.861	287.827
335.279	267.468	339.309	277.819	316.662	361.925	309.729	437.888	352.049	283.031	287.728	287.279	319.355	258.067	298.372	260.202	371.574	262.445	315.711	258.678	297.61	248.393	301.532	254.783	230.318	241.452	329.177	306.733	274.049	235.005	258.086	296.029	305.87	308.721	350.468	271.232	261.377	295.631	288.728	327.581	338.269	301.96		303.554	293.779	308.924	254.813	301.686	311.25	280.136
342.881	271.534	346.073	278.403	329.709	372.081	333.581	461.435	394.605	282.052	286.669	284.698	326.803	251.705	296.667	250.937	369.939	283.341	310.452	263.094	297.458	248.621	304.15	252.232	240.69	242.764	337.823	333.834	276.377	248.763	248.205	295.104	298.232	319.774	337.102	267.697	269.902	300.662	297.419	313.372	342.349	308.431	225.37	292.254	286.194	308.726	273.188	299.551	322.534	285.173
350.671	262.868	338.968	279.659	323.759	365.974	334.95	477.339	406.656	275.525	291.806	292.809	325.03	251.575	293.406	241.58	378.467	276.673	313.171	274.932	306.416	249.314	307.251	262.125	256.486	236.964	326.595	316.044	270.478	245.502	252.372	278.01	273.992	327.762	323.889	258.185	260.608	314.614	307.17	315.301	347.952	290.67	218.302	296.847	288.585	312.025	270.209	298.541	322.221	294.104
358.191	260.817	335.782	276.917	317.588	390.527	322.132	474.859	397.946	287.712	300.599	296.695	320.589	240.765	296.218	240.445	369.718	255.946	304.696	264.115	296.316	247.732	315.237	251.456	232.969	228.889	325.53	317.636	280.98	243.727	261.389	263.426	273.988	336.448	368.611	258.356	257.914	324.577	313.839	315.101	348.928	273.714	217.053	310.808	288.207	315.976	258.824	293.836	314.573	303.221
365.753	265.64	338.358	282.79	323.49	412.214	321.928	446.654	361.251	294.528	295.721	282.723	310.167	250.864	296.969	242.327	363.588	254.154	314.717	266.356	302.177	246.402	319.657	249.68	230.927	242.494	318.371	315.428	278.795	234.317	258.909	264.353	284.517	325.509	368.335	243.331	258.486	325.413	306.434	301.153	337.215	276.992		312.207	292.855	309.766	266.787	309.11	323.791	285.085
373.663	283.44	339.68	293.004	334.06	415.155	317.821	456.032	357.398	288.545	292.318	274.443	314.754	249.539	297.942	239.86	366.922	259.306	315.86	267.897	303.634	253.995	325.899	250.682	236.325	251.993	318.221	305.638	273.32	215.938	256.71	300.864	282.262	320.785	379.127	238.91	269.88	312.128	305.162	299.532	330.081	268.14		325.983	294.721	311.544	281.928	291.565	319.366	286.627
381.187	296.553	331.598	286.781	328.896	414.714	320.487	447.016	342.177	273.262	283.255	265.831	318.967	248.348	294.401	231.131	345.187	250.761	302.367	270.996	302.262	249.815	306.994	249.295	240.258	253.388	312.597	293.081	286.776	223.691	252.597	290.105	284.243	323.067	383.74	255.847	266.54	295.917	287.453	300.948	328.622	281.566	229.102	330.079	291.386	303.014	271.049	286.425	322.612	294.672
389.188	290.234	340.753	287.865	314.306	395.399	306.821	444.333	333.155	271.697	285.559	259.698	316.31	252.331	296.359	227.349	339.44	263.03	319.647	266.056	298.969	251.025	300.594	260.555	246.931	252.576	312.705	302.152	271.037	221.604	251.75	300.956	287.449	318.518	351.132	264.847	258.188	276.844	300.858	305.298	341.746	277.059	237.416	334.786	276.341	305.383	269.061	302.569	324.047	293.127
396.602	279.744	316.35	284.596	302.835	376.268	301.805	444.452	316.524	255.004	278.551	262.95	323.469	255.182	285.809	230.766	364.129	243.938	315.253	261.303	294.595	247.745	294.622	259.064	243.605	249.64	308.637	287.653	276.141	222.148	254.796	296.991	274.976	326.975	342.992	250.292	256.28	275.583	310.65	285.312	351.577	264.496	238.724	330.361	273.974	308.794	268.559	286.12	319.703	297.014
404.308	271.123	303.549	273.972	295.489	354.013	292.142	437.337	311.837	249.388	277.931	263.341	333.824	261.099	285.504	227.433	376.077	246.392	318.273	262.469	287.085	247.367	295.375	250.12	244.623	246.822	309.189	279.13	284.434	215.646	264.39	278.072	267.78	329.879	332.88	252.02	252.45	278.032	300.679	280.971	358.547	262.456	233.521	337.262	274.03	303.833	259.922	285.824	320.939	298.777
411.727	268.739	313.136	277.138	295.087	372.958	293.773	441.696	334.449	266.119	278.71	268.214	325.561	264.855	272.358	233.663	373.861	247.371	317.272	258.306	280.421	247.61	302.231	258.025	243.535	254.563	314.299	318.617	281.384		257.562	284.081	264.09	350.984	372.253	263.547	251.39	276.014	302.014	289.364	353.226	278.898	231.669	341.023	281.713	300.894	265.12	284.962	318.716	293.309
419.582	279.143	327.219	283.573	299.928	399.208	292.414	455.2	316.164	259.705	284.175	266.402	329.072	266.165	277.125	236.597	375.442	251.61	316.155	255.725	277.008	249.146	300.245	256.435	249.221	258.986	312.231	303.669	282.319		258.524	283.485	274.112	362.235	341.186	274.643	241.93	279.052	293.89	297.667	346.035	288.712	236.021	334.876	289.78	300.004	267.378	304.922	321.411	295.444
427.099	278.686	340.172	279.581	317.428	411.205	294.922	446.664	339.925	237.462	281.959	269.958	332.108	263.73	275.112	238.31	371.259	249.887	304.167	256.456	279.096	251.429	303.711	249.189	246.078	258.993	308.984	306.313	264.447	233.837	249.154	307.929	275.961	361.267	326.407	263.094	242.75	277.975	295.318	305.586	350.696	280.331	233.789	331.851	302.146	294.208	263.304	272.409	315.286	274.387
434.996	291.089	338.571	274.782	314.414	426.256	296.179	437.024	323.556	248.53	276.464	271.477	322.902	256.564	274.611	233.969	361.676	256.621	314.41	254.261	286.247	247.394	291.931	245.846	252.201	251.262	297.608	292.716	256.468	240.414	236.323	283.672	285.245	339.063	329.26	241.074	240.599	272.026	288.069	304.609	345.297	271.551	226.628	316.063	286.34	286.704	259.908	268.914	306.947	271.263
442.697	289.395	342.859	279.852	315.184	412.389	292.091	440.995	313	251.295	272.569	281.672	313.002	254.796	273.356	237.138	360.323	258.755	321.017	245.078	290.484	249.699	288.59	259.064	255.073	243.038	296.767	298.766	256.154	266.152	233.952	285.556	293.721	333.453	332.233	249.822	246.014	281.79	294.292	292.507	329.441	253.009	234.56	314.774	279.889	293.038	261.625	282.154	289.702	273.785
450.263	290.009	344.399	275.279	322.679	409.73	299.829	465.406	319.438	251.857	267.49	279.959	314.646	259.293	278.931	234.249	368.256	280.323	312.778	261.506	281.669	247.57	289.389	243.665	255.836	242.911	298.141	305.667	260.374	281.575	228	297.803	291.401	334.466	366.031	261.081	250.611	280.014	311.989	290.429	318.207	258.7	237.175	325.173	282.818	295.637	258.662	275.149	290.347	282.731
457.751	281.904	352.134	290.674	320.686	414.101	321.019	463.339	339.809	249.098	278.38	283.446	316.529	262.31	283.26	231.64	378.923	294.889	323.694	259.746	273.444	253.123	273.403	254.824	253.626	241.701	286.289	303.401	253.955	275.031	223.954	279.254	293.6	339.521	355.214	259.987	245.661	307.05	309.123	290.965	309.614	267.324	225.282	323.523	286.113	295.041	255.552	275.089	304.804	271.155
465.693	290.517	347.294	285.332	316.759	426.581	330.404	458.529	327.318	253.25	283.719	276.956	316.649	261.727	283.22	235.734	383.314	286.526	317.049	262.219	261.903	253.625	269.982	255.073	246.44	244.981	272.821	305.825	249.36	257.082	244.4	297.519	274.867	338.69	356.608	249.142	244.294	298.769	293.509	306.206	306.693	267.475	240.88	314.505	287.283	292.782	263.682	278.642	308.154	272.171
473.199	295.138	334.466	282.813	316.5	416.938	323.815	449.709	322.567	241.419	279.058	275.126	318.602	253.898	285.004	238.57	359.672	291.301	307.553	276.289	256.935	251.832	261.423	246.709	245.955	248.277	258.028	307.183	247.639	249.576	252.316	276.063	258.478	335.925	369.675	247.948	245.116	284.53	296.183	287.361	321.03	268.807	243.562	294.541	277.356	288.978	257.581	287.657	313.53	273.154
480.756	294.643	325.199	293.192	305.73	415.702	310.622	436.342	343.617	235.661	286.879	278.95	313.888	241.121	273.088	234.749	369.275	292.238	311.95	286.128	274.035	250.683	275.258	269.508	230.764	258.873	251.833	303.379	243.278	250.498	262.753	284.269	251.986	328.704	366.474	235.559	241.972	297.66	276.055	280.142	306.582	285.933	237.439	303.606	279.523	278.577	266.008	290	314.372	278.107
488.26	273.782	343.18	299.743	315.765	426.201	324.598	429.962	345.867	245.094	289.528	274.597	318.992	242.3	265.469	236.975	375.714	310.4	313.408	282.318	262.638	248.71	292.981	257.349	233.722	249.773	241.097	292.322	238.407	241.476	265.223	270.239	242.275	324.572	370.021	256.589	249.897	294.943	238.296	277.058	313.69	304.207	237.007	298.465	295.004	279.308	272.575	283.785	317.886	271.019
495.756	275.574	334.984	299.19	315.352	401.081	321.401	429.76	331.187	250.215	275.825	277.097	308.577	247.035	244.77	232.824	360.09	306.27	313.587	273.469	262.967	248.917	302.178	252.987	230.522	245.604	231.056	284.13	235.509	233.983	262.91	282.163	247.296	322.67	370.874	254.261	257.586	281.72	236.81	279.861	314.78	301.292	226.186	300.455	299.845	274.736	260.569	280.708	312.702	270.618
503.244	273.984	341.23	291.278	311.3	386.67	316.641	418.453	313.397	250.233	287.043	280.259	306.296	246.39	252.53	239.299	348.289	289.014	308.624	264.461	259.338	249.151	308.8	247.394	238.18	238.408	227.989	291.966	225.64	234.313	253.346	295.424	244.304	332.87	360.159	247.609	253.41	274.314	252.725	291.138	319.416	298.788	231.09	322.755	291.739	269.937	271.684	274.514	305.394	269.44
510.83	288.047	341.176	293.708	316.594	401.079	319.765	425.434	318.497	256.993	280.047	284.022	302.616	245.507	267.598	242.439	351.151	271.466	301.612	255.711	246.359	250.34	318.668	242.348	230.027	237.153	225.805	300.958	226.517	230.377	266.97	291.343	244.598	334.139	359.409	254.657	251.498	271.356	275.395	285.314	300.408	284.261		313.244	288.837	277.904	259.663	281.353	311.165	268.901
518.232	283.505	341.32	285.101	317.882	388.767	320.069	459.008	297.309	264.557	271.181	280.947	304.895	248.074	284.093	246.973	372.186	283.829	296.16	246.195	249.927	250.796	315.411	251.566	220.914	232.656	220.979	285.061	231.724	240.672	256.061	280.03	243.056	326.604	379.462	253.164	249.073	267.198	337.768	287.885	302.979	294.558		295.421	281.468	278.884	255.517	279.047	292.967	264.121
525.979	275.657	345.376	286.567	317.883	393.379	318.256	450.34	294.645	261.388	280.489	276.365	306.505	236.616	287.119	246.332	366.545	277.534	294.871	255.784	260.929	249.772	312.145	258.044		235.928		290.978	254.131	229.295	253.03	294.207	242.327	308.929	385.881	245.119	246.096	262.656	378.198	309.483	295.525	294.497	225.025	296.383	286.976	284.093	255.632	270.229	289.532	253.946
533.489	283.41	342.045	281.083	315.054	396.72	317.815	460.729	285.845	256.779	283.59	267.691	314.618	243.843	297.25	242.148	347.782	283.599	302.159	272.786	281.15	251.716	302.479	263.43		251.431		297.459	279.172	232.61	249.722	295.094	243.153	326.163	383.278	252.79	254.94	260.667	347.495	305.754	307.432	289.94	227.876	299.544	280.071	275.675	259.676	267.051	288.225	248.772
540.978	291.315	337.401	271.647	313.798	382.815	311.247	445.161	301.033	266.898	289.378	266.051	318.16	247.231	296.469	237.235	330.173	287.431	309.269	281.004	287.125	251.811	304.661	267.665		259.017		298.445	294.223	228.428	239.159	286.048	247.093	338.757	387.637	256.973	257.747	261.86	303.909	305.321	317.214	288.733	233.42	295.51	283.972	275.095	261.579	265.597	292.534	240.98
548.468	287.195	334.648	262.886	318.498	386.081	318.392	466.645	311.451	274.334	282.447	264.852	307.714	245.602	304.627	234.623	326.35	284.372	313.089	284.053	297.194	251.338	300.593	273.513		256.2		288.967	311.885	234.305	228.555	284.204	264.461	328.649	383.248	257.027	257.486	255.498	264.327	291.911	318.702	286.759	237.93	295.877	278.713	274.645	259.549	275.836	294.374	254.572
556.05	281.427	335.989	264.55	325.063	384.027	313.785	471.373	297.129	281.616	280.358	258.656	305.477	249.025	303.99	243.283	334.252	291.075	315.667	276.988	284.801	253.246	304.666	268.819		248.424		300.772	304.835	249.848	235.082	294.274	266.361	310.938	393.687	252.204	261.244	257.583	264.903	284.578	324.648	289.307	243.173	293.649	290.486	270.136	263.143	264.294	298.473	257.563
563.726	271.645	333.342	266.444	325.488	373.943	306.567	452.081	288.827	292.315	285.366	259.871	307.206	253.542	301.848	237.665	338.395	284.763	318.127	260.104	284.162	252.657	304.979	274.758		248.365		303.534	282.161	241.835	226.096	284.722	267.68	309.594	369.25	248.032	264.433	249.716	258.742	278.281	308.105	297.109	237.232	293.901	280.683	271.506	269.467	245.29	308.947	262.154
571.211	265.145	330.038	273.36	326.623	370.25	295.69	436.575	293.53	272.74	276.121	254.824	301.866	254.886	309.462	237.124	350.158	262.15	320.434	268.806	284.509	251.706	302.329	259.712		252.426		288.706	277.156	236.764	224.36	270.816	273.796	325.975	370.783	252.932	259.024	246.728	254.091	272.861	302.142	296.02	228.914	300.975	292.385	268.708	277.158	245.374	310.704	269.457
579.029	267.876	338.573	278.349	319.85	377.685	297.697	431.127	314.798	264.195	274.947	260.284	309.546	247.623	312.197	230.154	367.226	237.42	315.213	267.442	279.081	251.578	302.182	256.142		250.563		282.797	280.224	237.901	232.14	268.601	272.984	320.294	383.688	253.221	261.537	245.11	266.225	273.621	287.746	298.712	229.322	315.949	278.371	261.668	274.577	234.525	308.879	255.832
586.495	268.267	343.855	280.582	329.404	396.644	312.919	422.153	320.544	267.589	273.398	262.17	305.229	245.426	308.044	227.761	371.716	237.986	308.953	266.593	267.753	251.256	310.315	258.684		242.079		277.321	292.421	229.675	230.528	269.3	274.179	328.307	367.338	249.027	257.263	245.482	264.741	271.374	294.856	293.401		327.383	288.93	262.549	264.657	248.349	307.266	251.68
594	261.1	340.144	281.93	330.072	426.992	328.799	435.022	312.302	269.264	260.583	256.292	309.896	251.602	305.399	227.813	384.884	247.615	307.48	263.024	268.606	253.598	316.875	261.053		236.8		282.991	283.252	233.235	237.605	274.596	283.406	333.316	359.838	259.324	258.393	241.102	312.084	280.695	306.517	294.106	231.91	332.264	278.947	262.62	262.172	250.99	311.525	247.724
601.505	250.712	339.519	295.368	338.882	430.989	310.344	464.292	321.57	259.829	276.261	261.029	321.977	255.945	297.442	214.462	385.417	253.408	299.638	270.908	255.286	256.174	321.195	247.378		227.657		289.16	278.391	218.859	234.44	275.326	287.036	315.014	365.715	263.516	261.441	241.704	368.143	304.211	305.128	298.107	218.88	332.125	286.091	266.452	268.388	245.431	315.828	246.372
609.021	272.323	342.333	292.833	325.388	439.67	307.199	444.397	314.708	248.275	287.574	253.48	320.702	251.876	293.938		382.366	240.849	308.568	272.829	268.955	253.019	322.408	249.651		228.469		288.937	285.335	211.843	220.256	278.826	294.08	314.259	372.269	259.414	262.874	244.367	356.538	305.798	302.547	290.111	221.505	324.591	277.6	261.633	261.992	251.74	310.872	248.695
616.681	272.064	352.938	278.805	335.808	419.588	292.513	434.876	313.997	244	274.203	253.863	317.492	242.648	289.687	219.227	370.24	233.847	296.817	266.654	265.554	252.665	316.249	242.257		237.903		288.411	288.286			277.988	307.834	304	364.08	262.206	264.731	248.945	330.11	308.601	308.024	282.767	223.689	313.065	273.773	269.285	255.543	256.515	315.366	248.784
624.263	267.084	340.853	288.427	323.694	385.961	288.38	440.166	309.223	266.616	264.453	253.946	309.732	245.101	285.092	222.794	378.107	236.204	295.888	266.064	269.611	255.819	310.567	253.374		232.925		281.326	278.366			288.046	304.572	294.691	352.556	274.452	256.964	267.28	301.689	308.39	307.944	269.315	227.222	298.357	275.443	271.496	256.051	257.304	316.563	253.511
631.953	270.886	346.636	300.139	313.329	393.95	283.458	443.527	294.719	259.317	257.515	252.569	313.179	233.799	284.294	218.028	384.794	239.879	294.759	260.394	272.602	256.405	309.541	265.031		230.507		275.505	274.508			286.677	299.559	265.505	348.732	260.548	253.426	284.014	265.395	284.343	295.406	269.927	228.667	305.497	271.975	273.822	255.042	267.237	320.711	254.085
[truncated: 206 more columns]
