# Supplementary material for: Sustained store-operated calcium entry utilizing activated chromatin state leads to instability in iTregs
Source: eLife journal article supplement (doi:10.7554/elife.88874), 2023-07-04
Supplement: fig2-data2 [file 34min tTreg.xls]

## Sheet: Intensity Mean
Intensity Mean
Time [s]	Intensity Mean::1000031703	Intensity Mean::1000031705	Intensity Mean::1000031706	Intensity Mean::1000031707	Intensity Mean::1000031708	Intensity Mean::1000031709	Intensity Mean::1000031710	Intensity Mean::1000031712	Intensity Mean::1000031714	Intensity Mean::1000031715	Intensity Mean::1000031716	Intensity Mean::1000031717	Intensity Mean::1000031718	Intensity Mean::1000031719	Intensity Mean::1000031720	Intensity Mean::1000031721	Intensity Mean::1000031722	Intensity Mean::1000031723	Intensity Mean::1000031724	Intensity Mean::1000031725	Intensity Mean::1000031727	Intensity Mean::1000031728	Intensity Mean::1000031729	Intensity Mean::1000031730	Intensity Mean::1000031731	Intensity Mean::1000031733	Intensity Mean::1000031734	Intensity Mean::1000031735	Intensity Mean::1000031736	Intensity Mean::1000031738	Intensity Mean::1000031739	Intensity Mean::1000031740	Intensity Mean::1000031741	Intensity Mean::1000031742	Intensity Mean::1000031743	Intensity Mean::1000031744	Intensity Mean::1000031745	Intensity Mean::1000031746	Intensity Mean::1000031747	Intensity Mean::1000031748	Intensity Mean::1000031749	Intensity Mean::1000031750	Intensity Mean::1000031752	Intensity Mean::1000031754	Intensity Mean::1000031755	Intensity Mean::1000031756	Intensity Mean::1000031757	Intensity Mean::1000031759	Intensity Mean::1000031760
0	265.023	427.59	249.966	458.925	328.002	357.712	211.366	244.608	260.561	418.085	342.765	257.382	322.296	298.957	320.421	211.5	282.765	414.294	218.22	291.5	310.819	319.369	342.866	286.659	524.379	515.65	305.658	251.922	404.457	513.586	280.012	311.924	277.724	285.834	427.485	275.358	395.805	437.488	336.699	256.038	221.104	292.374	355.038	432.323	356.267	393.353	292.231	328.751	362.826
7.433	271.553	456.191	245.841	455.059	291.541	355.638	212.365	240.757	257.586	421.415	337.775	274.039	319.774	300.636	320.439	243.298	266.679	410.998	216.679	283.003	314.545	304.049	344.602	298.253	526.368	522.811	306.169	237.147	401.974	516.263	259.202	286.937	279.719	277.656	418.434	273.103	389.986	416.13	344.494	253.227	222.344	291.961	345.759	428.912	354.177	393.183	296.521	328.057	364.505
14.882	275.849	458.316	242.757	455.827	283.109	355.57	212.641	243.349	251.891	415.921	335.669	260.887	304.994	299.725	313.465	243.133	284.922	411.293	219.523	274.096	316.947	304.314	340.259	296.203	517.756	539.418	278.19	224.785	400.522	518.301	245.368	271.44	279.203	274.035	412.681	260.841	380.465	411.86	351.806	248.485	224.917	290	356.776	423.885	357.082	396.692	294.435	325.147	351.93
22.564	273.211	461.273	246.424	455.126	297.004	356.488	254.914	240.407	239.982	437.251	336.074	245.779	305.078	299.125	303.475	239.382	299.361	402.595	215.778	268.089	315.121	299.037	341.159	311.551	507.493	533.512	258.726	226.927	395.361	493.642	246.224	280.199	279.435	267.329	411.314	260.651	382.418	427.577	360.255	251.935	232.791	289.022	370.864	418.053	351.873	401.409	274.684	325.677	347.884
29.959	286.968	441.663	249.419	459.257	298.88	355.209	275.804	236.843	238.173	449.965	331.244	225.299	318.618	298.277	300.452	250.211	281.046	397.531	214.933	265.182	316.67	292.978	338.936	314.785	502.561	532.307	251.764	225.926	388.012	480.509	244.333	283.137	270.702	266.732	409.329	281.524	376.776	430.923	364.217	238.093	235.563	279.385	376.577	422.282	341.869	399.351	255.505	325.101	347.871
37.445	276.429	435.444	241.21	460.501	310.523	353.308	274.807	231.851	248.915	453.599	321.195	228.278	314.811	301.493	287.606	251.64	304.244	391.591	217.474	251.705	308.414	305.516	337.225	295	497.522	527.287	256.278	222.949	383.39	478.462	231.517	272.041	266.52	265.935	417.641	278.034	374.665	415.104	340.777	244.481	233.13	273.699	369.023	420.824	345.634	401.276	282.232	324.967	344.997
44.979	282.093	426.141	236.969	442.279	293.453	348.62	268.63	225.118	249.343	431.979	311.265	252.588	296.876	293.917	284.773	248.68	308.214	388.101	218.579	251.585	309.081	301.166	322.829	270.42	481.554	512.281	260.543	231.656	365.841	468.18	249.664	266.569	265.68	260.051	409.477	283.794	372.422	406.895	329.284	232.421	229.235	268.911	363.247	419.065	341.736	398.533	241.815	317.627	341.902
52.535	273.075	430.012	232.393	441.29	280.53	347.796	272.468	226.016	249.141	423.779	305.436	249.975	305.046	297.636	293.536	247.225	326.798	389.27	221.742	256.188	313.817	303.111	323.367	294.417	472.988	510.381	253.649	257.034	374.322	478.804	261.931	256.157	285.436	256.62	404.112	303.309	377.308	425.033	322.075	231.273	230.455	270.88	347.33	418.033	349.062	395.919	247.051	319.092	345.766
60.061	262.228	431.894	231.925	450.283	274.724	349.237	270.289	232.309	252.241	426.059	307.652	230.475	297.143	303.858	283.117	250.338	329.407	383.925	220.787	251.096	303.315	298.606	330.105	281.578	472.216	504.748	279.147	266.917	387.445	472.03	298.308	251.997	280.634	263.711	417.811	316.435	386.659	437.22	309.768	247.905	234.292	274.214	343.024	423.592	357.814	393.05	246.323	321.512	358.32
67.583	256.372	420.06	227.804	440.228	279.283	342.833	271.561	228.784	248.127	409.659	306.22	225.519	293.367	307.295	284.605	236.84	313.516	380.791	216.607	241.926	302.974	297.664	326.65	273.237	463.896	514.789	266.994	236.563	375.957	468.489	305.013	246.239	269.934	257.41	407.183	307.574	385.294	418.935	311.833	239.832	234.176	272.761	343.043	420.065	343.256	391.257	251.393	321.506	364.833
75.154	270.997	429.985	231.956	450.575	291.445	344.216	271.128	232.383	241.245	399.035	303.231	218.521	304.191	314.246	278.435	239.045	308.381	386.479	215.689	236.866	306.5	295.894	322.206	281.894	466.606	530.508	261.212	239.199	357.997	469.133	313.343	249.067	270.311	251.982	404.394	282.397	391.077	433.237	317.01	248.672	245.357	269.121	351.715	426.398	338.412	392.141	243.971	322.314	354.849
82.672	262.75	434.344	236.722	439.559	294.29	336.965	271.135	231.203	243.018	394.302	299.502	216.849	302.154	314.405	275.559	227.822	308.074	375.543	217.035	232.552	297.125	298.232	318.827	274.5	459.839	516.011	262.743	242.981	359.441	469.484	320.311	239.856	259.662	252.683	392.14	258.172	387.676	415.711	295.514	259.013	241.574	268.877	346.249	415.49	339.701	394.228	247.656	318.501	354.952
90.349	267.222	432.926	230.75	441.926	281.583	340.866	268.09	234.648	235.869	389.052	294.97	205.757	299.57	321.178	272.983	260.951	309.925	379.101	217.704	250.271	298.753	292.343	322.305	277.772	464.916	508.476	268.793	255.914	361.108	465.696	317.879	234.101	258.965	252.336	395.066	260.259	378.134	433.879	306.443	250.246	241.442	278.648	346.504	419.138	339.481	390.309	256.343	317.572	361.685
97.755	260.286	422.582	229.29	437.515	275.544	338.057	272.255	226.917	234.415	383.54	296.889	210.647	301.28	327.134	276.703	255.306	290.536	388.281	217.848	250.592	304.344	288.816	322.875	282.904	458.256	519.08	260.079	262.82	363.077	456.652	316.898	240.663	262.592	251.895	385.345	262.313	377.496	426.755	306.294	253.288	245.267	286.082	364.888	420.443	340.057	385.74	246.563	318.594	361.563
105.493	259.776	407.147	230.479	433.935	279.904	335.952	268.579	225.42	237.919	381.662	290.116	225.366	298.622	328.587	265.78	231.321	282.901	379.447	217.723	237.401	301.095	284.468	319.339	262.994	452.308	505.217	258.5	264.178	351.925	432.659	301.545	239.415	256.6	247.15	368.428	265.488	374.124	403.154	314.029	241.939	247.869	285.509	358.838	425.5	341.371	378.901	237.74	314.298	344.905
113.559	263.657	416.875	228.995	437.098	280.658	342.097	270.931	220.218	232.786	389.139	286.156	246.515	315.206	335.91	255.733	232.516	293.572	383.086	221.242	241.665	298.124	295.979	316.393	267.634	449.257	508.801	257.848	262.043	349.622	426.781	300.499	243.331	260.629	253.33	360.864	287.769	371.011	400.109	322.313	243.388	256.938	277.924	355.734	416.031	342.626	374.869	238.46	319.597	355.181
121.273	260.143	411.992	229.962	421.045	285.307	341.343	264.137	218.918	227.511	382.174	270.095	278.059	321.675	331.808	244.359	224.765	288.814	367.642	213.074	235.125	295.488	295.387	311.385	263.31	442.066	491.961	245.014	253.976	356.591	417.14	291.396	229.451	258.105	249.225	355.771	294.86	364.095	403.952	307.652	228.891	269.725	271.016	346.47	414.202	341.34	365.861	235.403	314.524	347.358
129.165	261.489	420.12	230.14	416.544	290.004	345.632	260.155	228.399	232.467	387.917	269.116	297.93	307.921	331.868	242.164	229.3	278.359	371.698	217.304	229.195	304.7	296.434	307.316	267.161	445.218	508.642	256.053	239.553	354.706	421.232	280.358	223.164	256.022	247.44	359.06	297.843	365.009	392.85	313.788	229.495	317.506	271.618	346.263	416.134	330.988	361.489	241.045	318.361	343.967
136.608	264.795	417.052	226.531	405.53	282.143	340.584	262.506	233.99	233.522	382.646	263.492	300.269	318.336	331.686	245.828	231.978	276.881	364.168	219.178	220.905	293.993	287.931	307.721	262.051	449.312	512.642	276.452	234.461	349.435	438.164	282.295	221.252	250.879	253.775	350.347	300.57	364.636	364.865	300.596	237.939	347.972	270.762	352.484	431.451	331.173	362.894	239.313	312.792	351.426
144.273	263.826	415.905	228.821	394.513	273.722	342.796	255.929	222.13	228.004	385.904	258.358	295.17	312.167	324.117	253.265	232.712	284.715	361.514	212.013	217.764	282.483	300.097	303.348	264.589	445.988	508.676	257.206	256.086	347.361	439.599	257.48	230.204	248.81	258.409	345.932	294.148	360.085	364.367	315.911	244.024	363.094	269.4	350.039	431.748	330.499	361.277	223.261	314.015	352.895
151.891	273.015	418.702	232.558	391.386	276.138	342.296	259.754	226.36	232.177	383.622	247.034	309.622	295.669	327.603	253.917	230.383	302.669	366.278	214.013	222.134	280.926	286.444	306.414	257.47	444.805	497.655	268.401	251.934	335.121	432.157	252.509	232.966	249.576	256.89	333.467	289.699	362.925	381.637	315.866	235.412	374.459	268.766	351.517	427.456	319.189	367.786	233.649	315.546	353.196
159.518	274.762	426.039	228.483	391.383	275.168	344.851	259.269	238.361	232.593	388.283	242.013	292.839	298.399	338.131	250.775	225.069	316.658	366.567	217.398	227.991	274.516	289.293	307.281	265.542	445.854	489.443	247.289	246.879	347.397	403.636	253.045	234.828	256.004	260.714	325.654	294.398	359.971	394.553	313.986	244.914	382.282	269.349	358.315	424.257	315.998	371.508	232.167	318.348	352.382
167.29	269.048	438.951	227.986	378.147	262.909	344.521	254.273	231.28	226.727	371.64	235.031	292.831	309.846	337.534	247.109	224.759	326.871	365.486	216.726	227.428	274.519	298.236	301.058	255.754	445.215	481.05	239.253	246.621	347.409	398.937	250.014	236.303	255.823	260.349	317.243	282.441	358.291	383.544	312.987	238.236	385.516	267.714	356.049	418.491	308.572	370.866	232.551	353.857	340.784
175.157	268.129	429.096	224.475	386.515	278.162	339.323	250.586	230.565	229.777	368.923	229.826	275.87	291.206	340.71	248.034	215.679	329.053	368.845	219.387	225.823	279.133	282.514	303.592	280.977	442.627	479.287	243.137	239.824	341.29	401.704	237.992	231.421	256.408	263.778	317.508	280.074	355.45	377.573	297.154	238.501	387.65	263.453	350.008	420.068	300.448	370.087	238.716	348.957	340.203
182.699	275.612	425.93	225.144	380.224	272.979	340.467	246.416	217.141	228.96	371.818	226.371	270.703	295.812	338.987	251.471	219.18	321.197	361.214	213.789	226.302	280.956	259.951	303.622	273.357	445.753	476.791	232.762	239.825	332.178	409.963	227.837	229.076	253.775	258.615	308.029	283.596	355.393	357.288	308.397	227.72	388.874	260.42	345.913	414.423	301.013	365.379	228.638	342.572	337.805
190.567	286.877	427.746	226.238	383.118	261.3	338.307	251.493	218.061	227.958	371.464	229.535	267.67	312.775	347.601	248.547	221.328	328.307	371.134	212.448	228.624	284.781	271.916	306.177	273.554	445.99	473.463	233.773	254.601	334.787	395.904	243.04	229.592	249.579	258.225	309.256	280.203	343.468	348.985	288.064	225.234	392.479	262.715	349.213	406.929	305.467	360.906	228.388	336.366	337.847
198.388	273.904	425.483	227.859	367.538	260.863	335.978	246.696	209.957	226.793	362.514	229.767	270.367	318.168	350.019	251.345	220.063	335.218	361.138	215.253	228.545	291.224	274.734	307.037	260.675	444.875	461.312	243.258	252.914	335.42	387.711	259.463	230.677	249.557	257.767	307.695	286.572	343.021	352.672	290.505	226.229	394.053	259.387	348.973	401.169	319.338	357.396	227.789	327.736	331.869
206.004	258.817	420.409	224.906	362.556	268.28	330.655	241.863		220.069	360.574	234.195	263.987	301.768	342.585	242.827	212.723	341.195	355.328	214.072	208.013	288.969	271.842	300.318	267.231	440.199	441.311	245.145	247.929	323.003	362.875	243.804	233.267	240.776	257.531	307.308	288.233	337.819	377.684	273.113	227.534	395.543	257.102	341.846	404.477	328.614	350.322	223.612	317.437	329.662
213.579	251.883	419.284	222	355.874	272.258	326.902	242.529	217.066	218.567	357.821	246.863	258.1	309.284	347.712	242.308	223.143	346.037	341.636	213.73	216.24	278.663	271.559	295.356	248.135	436.527	420.506	259.212	252.972	308.331	347.659	244.491	236.858	237.937	250.394	300.603	285.273	336.148	365.938	285.158	228.536	394.974	255.624	347.011	405.69	329.774	347.309	220.783	313.982	325.173
221.427	257.935	426.169	221.042	365.624	278.035	328.965	245.289	222.925	221.503	361.977	248.839	266.205	318.203	349.587	242.261	211.39	348.907	331.845	213.084	216.195	287.032	271.49	291.901	255.014	443.294	438.71	248.128	261.457	313.225	350.816	242.162	250.724	245.977	253.983	298.031	273.06	343.833	370.057	297.659	224.342	403.318	255.696	355.84	402.321	327.394	348.28	222.036	310.444	327.635
228.922	263.069	429.614	216.236	362.107	275.157	325.342	247.98	226.112	226.574	350.151	229.88	262.83	317.667	347.804	246.8	214.014	343.705	322.517	210.721	222.658	286.869	272.448	289.804	272.666	438.763	438.87	267.015	260.083	298.773	325.691	244.986	253.365	247.488	251.782	284.191	274.447	353.459	377.938	288.639	226.138	404.462	255.951	345.542	395.773	325.6	349.917	227.502	308.133	328.014
236.467	274.687	451.896	217.325	356.647	274.185	326.702	242.486	227.617	225.257	346.674	224.262	260.707	308.704	346.074	241.656	212.15	336.884	322.231	211.51	222.382	296.069	280.191	293.876	280.319	436.221	458.234	249.065	273.204	305.182	314.676	249.859	250.771	251.38	250.531	276.534	279.957	352	389.177	301.075	231.189	406.056	256.56	350.416	398.803	318.311	354.119	229.082	306.774	325.93
244.013	283.116	444.147	219.268	354.456	279.024	324.033	242.783	224.757	228.654	338.841	220.018	258.444	307.319	347.247	240.466	210.635	337.364	321.413	210.317	226.948	288.424	273.188	292.729	267.639	435.854	448.692	246.664	263.997	297.909	301.752	237.539	260.125	261.97	249.933	277.589	281.887	358.491	368.034	300.018	224.358	408.04	255.056	346.662	403.059	318.266	355.743	230.452	299.556	320.09
251.573	264.993	437.54	214.033	351.738	273.03	323.711	240.139	215.595	232.021	332.496	221.198	257.874	294.442	352.058	239.605	213.98	331.676	330.862	215.476	226.561	290.123	269.497	296.072	255.451	433.197	446.827	233.18	266.977	298.969	294.061	226.344	264.322	265.565	249.123	271.619	273.292	359.832	359.061	294.108	218	414.286	256.925	344.297	410.97	324.197	351.07	230.848	283.739	320.228
259.096	255.962	436.44	217.16	349.381	271.793	309.89	240.555	210.407	226.906	334.465	222.157	257.669	277.512	352.89	238.765	215.398	338.671	323.734	208.409	223.69	281.47	263.364	295.436	252.173	425.538	453.958	241.371	257.848	288.757	278.235	224.922	266.793	266.139	247.261	267.783	277.693	361.536	356.237	285.704	219.79	414.931	258.324	346.235	408.446	322.876	354.283	224.622	273.571	320.171
266.724	259.379	430.534	216.551	355.489	282.487	306.465	240.957	213.971	228.605	333.342	224.522	261.786	280.664	361.62	241.659	219.674	337.648	322.039	211.19	222.47	292.213	256.92	299.18	259.714	424.636	468.823	242.158	255.761	314.504	278.313	220.966	259.984	263.069	250.607	263.089	272.637	357.573	355.393	281.695	229.824	417.723	260.352	336.47	413.832	330.638	352.382	226.26	275.081	324.992
274.383	252.848	436.624	219.13	368.56	273.656	307.996	239.559	216.142	229.433	332.963	223.967	258.386	298.076	364.205	243.588	223.089	345.711	324.522	211.855	220.713	285.302	263.299	297.972	258.356	429.173	482.509	243.503	238.655	314.531	283.218	218.852	264.933	267.181	254.956	267.424	271.163	356.231	357.178	276.924	229.907	424.631	261.401	339.131	422.152	337.407	357.834	226.475	273.498	316.099
281.962	252.132	432.061	215.707	371.172	278.555	307.699	236.79	218.509	224.07	332.923	220.802	252.799	283.418	362.221	240.158	213.015	340.283	333.157	214.109	228.291	285.493	259.706	296.077	261.686	427.797	475.047	242.112	248.611	305.452	285.399	216.757	263.623	274.152	247.644	267.914	271.331	354.68	372.457	294.23	223.966	426.893	259.635	332.257	414.888	345.238	359.889	228.382	271.791	318.797
289.411	276.07	437.073	218.051	362.335	291.403	311.992	245.777	217.507	229.162	335.349	228.059	256.108	273.066	363.462	236.819	209.872	322.719	323.253	211.338	227.058	279.167	246.88	295.1	265.569	425.555	463.662	241.512	243.381	296.008	283.79	214.694	265.661	274.702	243.379	263.942	270.768	355.458	377.428	284.916	224.724	426.823	260.472	335.712	416.776	347.625	358.114	228.65	268.344	319.055
297.047	268.853	451.169	218.327	363.481	282.198	309.038	250.385	225.443	228.204	332.953	227.756	270.093	268.204	369.529	235.751	216.355	320.375	315.266	212.187	224.711	283.631	245.084	297.297	267.031	428.939	460.63	245.666	239.294	289.526	292.275	223.317	270.191	273.183	239.005	264.857	270.903	363.624	371.248	286.984	222.771	427.087	261.235	340.294	416.846	341.136	361	226.255	265.29	319.308
304.956	249.356	451.66	217.1	359.573	277.386	313.364	247.304	225.856	231.429	334.201	224.767	278.949	285.141	368.009	238.658	222.156	319.409	323.195	209.937	220.944	282.411	251.715	299.161	251.895	422.034	454.619	235.051	228.213	293.634	298.375	218.714	277.913	273.82	237.274	266.5	272.065	336.547	374.902	281.992	223.198	427.336	262.505	342.238	416.415	337.825	363.013	230.042	265.362	326.986
312.681	261.712	452.735	218.079	366.691	266.082	318.513	253.204	221.947	236.608	321.927	226.084	267.145	295.602	372.839	241.171	233.48	304.916	332.817	211.615	216.431	283.886	265.754	309.305	257.301	421.718	474.145	234.249	238.628	289.586	287.924	219.688	263.109	274.706	231.801	257.234	277.632	327.656	373.002	301.667	229.875	426.338	266.673	344.254	411.221	327.241	361.746	232.15	264.059	322.966
320.298	257.258	437.865	217.52	360.843	279.073	319.021	250.363	219.765	230.773	309.764	225.143	263.637	295.772	369.825	237.074	223.946	286.314	332.134	213.497	220.941	278.686	267.781	294.912	227.432	422.199	459.121	239.046	235.551	278.175	280.758	222.695	254.415	270.289	230.421	256.943	281.233	333.35	362.751	315.336	230.622	427.309	263.541	343.122	397.774	310.837	355.251	231.09	259.772	315.983
327.888	251.409	431.072	219.209	346.834	273.105	308.996	233.673	214.314	226.728	298.285	223.382	255.68	292.508	362.225	231.634	218.5	291.2	323.997	212.053	218.162	272.273	262.158	290.186	247.493	419.445	441.7	221.492	240.73	264.596	276.446	224.652	246.371	268.71	221.884	256.305	282.356	326.097	379.297	301.26	225.601	423.679	260.801	341.022	391.234	298.006	344.38	220.668	254.875	308.494
335.212	265.905	423.012	221.743	350.582	269.133	308.795	242.463	215.307	221.948	297.917	223.393	251.859	305.951	361.822	229.548	213.691	273.64	325.71	212.8	211.667	273.919	257.842	291.099	238.418	418.996	425.063	229.209	244.741	268.341	267.73	227.314	246.229	268.861	225.787	254.82	274.022	328.422	397.528	290.629	229.961	426.205	258.887	333.453	392.521	296.149	338.835	225.908	258.758	310.851
343.16	256.422	415.495	219.412	360.543	281.712	306.233	250.336	214.238	230.996	291.399	223.076	242.297	316.735	360.675	236.987	213.712	262.645	321.953	216.506	212.474	276.182	266.354	297.162	226.467	422.452	428.975	228.724	242.186	270.629	275.834	227.363	242.706	271.933	232.628	255.052	261.014	338.691	382.785	295.603	223.366	429.03	259.99	340.509	391.053	294.011	340.831	217.119	258.458	302.045
350.632	250.263	408.21	217.728	364.462	272.788	306.263	251.529	217.007	229.129	289.205	221.083	240.298	305.908	354.047	230.913	214.407	260.424	316.972	214.265	210.926	279.029	265.313	292.837	234.26	426.712	417.604	225.108	228.047	272.317	276.476	227.753	233.52	270.763	235.55	254.038	272.843	338.894	373.773	282.889	233.913	426.077	258.448	346.268	399.779	295.777	339.062	211.49	256.014	304.367
358.149	244.403	407.006	219.661	369.668	263.804	302.703	248.899	220.446	227.614	277.531	220.481	249.638	301.202	350.159	225.573	214.801	273.792	318.003	213.878	206.423	281.638	263.576	294.452	253.3	423.643	414.396	228.718	225.122	278.829	273.196	228.184	237.255	273.304	240.39	253.991	276.971	352.819	362.483	291.712	219.295	425.486	261.777	350.081	409.085	301.167	340.076	209.359	255.653	307.713
366.061	252.183	417.081	218.527	377.994	276.749	307.761	249.98	219.223	236.759	270.277	220.179	251.201	304.765	351.531	228.835	215.464	277.279	316.958	214.604	205.193	286.958	265.713	296.48	263.274	423.396	421.593	222.734	232.758	277.191	262.207	222.883	238.217	273.938	242.577	259.818	267.367	328.88	366.134	288.024	216.091	428.69	264.533	343.154	416.133	293.542	346.554	216.073	253.914	312.672
373.624	255.617	407.628	217.131	373.277	279.826	311.749	247.833	226.207	229.219	267.123	218.423	261.959	294.972	349.768	222.514	214.516	284.13	319.762	215.111	211.763	287.271	263.592	292.953	268.484	427.973	413.049	216.42	229.005	270.695	259.398	211.404	239.072	283.087	247.248	262.895	270.929	321.604	354.087	288.02	223.319	426.443	266.034	346.642	398.345	304.731	345.066	209.939	256.753	307.847
381.542	252.129	402.273	220.164	370.757	285.006	315.004	249.56	227.173	227.656	262.816	223.256	259.785	306.945	351.015	224.3	216.277	291.631	315.696	214.836	213.13	286.773	281.149	295.032	271.152	418.543	412.637	210.183	242.716	268.729	255.845		248.973	281.035	241.56	261.326	271.111	327.638	344.944	281.563	225.514	430.086	262.397	351.689	396.02	304.856	343.411	214.219	259.031	302.75
389.121	245.375	406.771	220.8	372.048	266.304	314.696	245.732	211.444	224	262.588	222.098	257.795	296.547	340.471	221.339	213.748	281.471	311.504	213.662	204.691	282.836	260.752	296.383	264.936	413.91	402.551	228.397	246.846	269.408	246.537	211.612	242.989	271.004	237.595	257.048	271.866	315.546	341.063	282.743	221.004	425.819	262.46	348.481	394.559	296.009	344.818	213.302	257.177	291.298
396.597	236.401	407.817	222.432	380.056	262.369	324.625	239.341	214.254	225.215	267.948	219.116	242.685	282.511	338.881	225.035	209.518	287.786	311.723	216.631	209.531	282.151	265.671	300.316	261.576	412.065	405.161	239.486	235.648	274.541	247.707	212.357	239.571	271.996	235.441	260.159	277.527	311.165	332.005	286.929	219.69	428.784	258	338.529	398.131	293.415	349.661	212.42	257.733	298.612
404.251	244.388	409.035	217.81	377.22	272.112	315.89	235.998	207.66	220.525	268.498	221.36	242.142	276.002	331.247	226.448	216.944	283.292	311.239	213.699	207.649	279.168	270.381	299.789	258.464	406.038	399.31	227.805	248.91	292.109	254.696		235.821	268.024	239.921	255.725	273.479	317.191	335.135	274.707	216.956	424.68	262.696	331.528	391.241	278.038	350.318	214.736	254.568	298.423
411.71	235.145	416.181	217.862	375.434	271.716	308.785	235.354	207.617	221.568	270.228	223.395	240.119	276.085	330.596	224.108		282.854	311.706	213.439	208.221	280.217	266.337	296.509	247.286	400.058	403.159	225.257	245.167	284.039	254.783		228.559	264.914	237.869	259.714	262.016	312.49	323.672	269.477	219.296	425.539	263.839	329.144	388.151	273.596	352.885	209.696	254.721	286.143
419.502	227.385	417.826	212.971	368.94	271.475	304.951	226.837	210.283	221.042	274.74	226.35	241.312	262.587	325.552	224.539		307.461	313.251	211.66	207.5	273.47	255.547	296.04	234.43	402.016	395.072	226.912	257.725	282.606	256.529	211.788	227.177	262.646	235.123	259.313	259.298	327.737	313.848	256.265	219.958	423.821	268.65	332.815	395.315	268.929	347.563	204.607	256.755	284.971
427.034	225.384	416.913	217.85	369.028	274.603	301.872	235.81	211.723	220.879	266.22	223.74	245.612	261.767	328.242	226.435	208.698	305.032	317.534	213.527	212.568	272.383	266.728	295.495	244.018	405.239	392.58	233.233	252.881	280.613	250.895	215.006	228.635	262.407	235.422	256.711	253.86	315.871	320.143	268.296	229.217	425.018	272.647	329.25	393.839	271.162	345.291	204.972	258.288	270.072
434.92	225.682	414.487	218.475	364.321	279.624	295.022	237.036	212.489	220.396	262.022	220.681	251.148	266.706	326.651	223.111	208.776	307.029	313.049	212.342	210.939	266.008	262.405	295.868	223.315	397.672	385.536	235.754	256.817	271.766	255.524	212.528	227.703	254.289	238.933	256.948	259.255	322.067	338.194	274.778	221.633	424.112	273.368	322.701	398.316	271.558	335.279	211.39	254.932	275.491
442.659	223.782	414.649	221.742	366.938	271.883	294.572	240.788	212.323	222.168	262.734	225.461	250.578	274.499	324.646	226.404	216.171	303.205	319.179	209.807	217.983	260.831	261.507	299.196	218.084	400.315	378.749	234.407	264.872	275.387	260.623	207.757	229.056	250.986	233.447	253.304	264.78	302.622	350.139	274.621	229.632	426.587	272.852	322.646	399.741	272.921	333.51	204.928	255.697	279.881
450.225	221.701	417.788	223.035	369.153	265.748	293.796	241.122	212.694	224.535	260.193	225.622	259.838	287.382	321	224.162	216.101	301.015	322.036	211.681	217.261	254.126	265.629	300.376	217.839	399.998	378.692	236.996	270.646	268.571	271.677	211.095	231.599	253.458	243.19	253.672	270.997	293.675	359.341	273.94	221.817	424.953	275.516	324.028	390.634	268.771	332.594	211.915	254.342	288.19
458.011	220.196	410.981	223.552	362.225	266.855	292.239	236.292	211.048	226.338	253.026	222.508	250.276	296.49	314.368	223.547	212.953	304.441	316.381	209.764	219.793	253.5	258.877	295.918	211.951	389.468	383.348	232.311	257.348	271.256	275.371	214.431	233.622	252.889	248.332	253.952	264.316	322.808	349.883	272.588	225.223	424.919	277.141	321.147	399.175	263.319	329.186	223.503	256.886	294.258
465.674	215.06	416	229.956	370.675	262.114	290.739	247.557	207.961	228.112	260.966	223.809	245.479	281.53	310.653	219.328	207.653	297.743	308.59	210.577	214.682	258.025	267.247	295.546	215.007	393.643	380.927	234.101	267.672	275.36	280.902	212.292	230.534	251.518	250.1	255.938	266.608	321.727	341.673	267.068	213.243	424.105	279.721	322.282	398.552	270.228	333.652	218.039	261.708	279.107
473.184	217.073	420.395	226.519	374.362	264.399	285.579	244.672	207.714	231.133	263.87	228.954	245.026	289.347	310.458	220.314		298.018	309.292	209.564	214.418	262.385	271.465	294.147	212.863	389.726	394.096	243.431	262.549	276.136	287.249	211.946	227.911	256	252.451	255.108	269.734	309.121	342.99	271.211	218.692	425.799	281.227	334.733	399.119	267.538	331.43	221.897	264.781	270.64
480.69	229.646	418.504	228.92	373.024	270.669	288.817	244.562	207.536	235.392	263.216	227.599	240.623	288.99	309.355	221.468		301.513	313.51	214.282	217.471	264.567	269.297	293.883	208.453	389.91	415.735	237.789	261.38	276.602	274.218	211.707	230.012	259.828	250.17	251.53	266.307	313.016	333.238	287.242	221.479	427.667	281.109	331.173	398.881	263.448	329.979	222.149	261.506	270.799
488.234	229.885	419.422	228.431	364.661	271.888	284.203	240.512	204.742	231.954	255.556	226.282	235.578	278.235	310.02	217.7		295.46	314.178	211.094	226.283	267.451	265.629	290.549	212.161	388.12	406.177	220.327	243.308	277.932	287.905	211.988	228.433	262.615	245.029	251.266	263.065	312.846	349.46	275.545	213.491	428.007	281.171	324.263	402.865	266.788	328.387	216.45	260.581	276.434
495.712	221.417	424.075	231.577	373.387	258	281.899	240.302		230.262	255.682	223.429	234.823	257.575	304.293	217.038	207.139	292.197	316.638	211.648	230.981	272.93	259.819	295.333	210.39	389.28	393.34	217.295	247.428	276.869	292.139	208.931	226.624	266.11	247.92	250.338	263.369	314.244	352.279	271.828	228.507	426.822	281.366	325.989	397.837	262.278	331.23	219.479	260.793	268.565
503.28	214.315	419.862	234.091	373.003	270.208	279.732	240.625		232.398	256.623	222.939	240.218	247.692	307.542	217.009	207.33	286.117	314.049	213.301	221.905	277.812	262.636	298.375	261.936	385.216	394.55		239.935	266.027	288.97	209.135	252.502	265.617	249.147	248.751	265.868	302.264	349.938	263.77	235.636	426.137	275.186	327.567	399.548	264.027	329.38	216.834	260.841	261.699
510.749	216.233	409.922	220.441	366.113	260.328	276.125	233.035		227.243	248.188	227.22	233.816	248.263	300.274	215.645	208.677	274.107	307.86	214.228	214.92	267.215	257.201	287.604	309.905	378.102	393.403		243.299	270.356	292.077		230.492	255.662	249.761	245.626	266.058	275.345	336.506	267.284	224.791	424.182	274.758	321.603	396.54	264.885	328.018	210.051	259.502	262.022
518.499	221.106	412.651	219.918	366.982	264.547	274.533	229.81		224.609	244.93	222.013	224.522	248.529	299.282	216.384		271.174	305.015	213.326	220.838	272.863	248.943	293.669	326.758	378.624	390.755		253.212	271.509	287.492		239.801	257.325	247.995	246.122	276.168	289.16	334.557	274.183	218.139	424.107	273.702	316.778	397.244	269.802	333.638	206.446	260.04	264.395
525.945	210.275	411.737	222.073	362.923	260.781	274.848	232.3		224.541	244.829	224.049	218.793	255.288	298.512	214.509	212.27	289.453	310.677	213.809	219.768	273.553	249.842	290.293	326.553	377.26	390.393		229.252	277.835	270.758	209.871	238.214	261.707	243.31	246.409	281.155	289.026	347.304	274.385	220.609	422.395	274.903	317.126	388.284	279.648	330.443	207.521	256.458	256.106
533.432	214.083	410.599	226.829	360.155	266.242	274.697	236.86		220.191	254.003	228.125	226.793	263.161	302.017	215.398	207.703	294.949	313.082	214.836	222.571	279.205	255.275	285.057	324.278	383.822	392.127		217.613	284.054	256.047	210.386	240.487	270.667	242.833	248.721	287.381	283.485	344.673	268.621	217.808	428.124	275.082	319.322	390.857	285.669	335.75	203.583	257.99	258.019
540.907	214.085	408.363	221.885	358.247	256.213	270.825	238.936		221.438	246.861	225.988	234.139	273.198	298.252	216.811		287.461	310.962	213.87	224.135	280.258	249.185	288.364	288.247	381.035	383.275		217.659	275.682	241.322	203.267	236.233	269.56	232.089	247.167	283.868	272.718	327.016	267.901	217.646	426.884	271.437	311.283	394.068	270.139	335.332	204.804	261.117	258.623
548.509	214.007	406.443	231.239	362.786	271.842	266.511	238.408		220.468	247.702	227.572	228.33	280.281	301.493	213.749		279.267	304.921	213.743	216.372	284.132	261.175	287.989	269.486	385.907	378.662		218.922	274.692	238.175	209.481	234.608	264.136	235.165	248.603	276.939	271.365	323.575	273.557	215.675	426.993	273.846	312.931	388.351	270.745	333.394	213.745	263.979	253.159
556.018	209.638	396.677	232.049	361.303	267.273	265.02	237.681		218.513	250.993	225.297	214.67	270.664	295.811	211.641		274.792	306.98	215.045	213.607	275.458	251.291	281.048	273.765	384.753	372.481		206.917	266.507	233.123	205.741	230.24	259.403	233.654	248.584	274.179	267.086	315.013	271.153	219.732	421.409	266.601	308.757	383.755	261.499	330.285	205.037	259.622	254.588
563.667	206.277	398.825	232.013	364.411	269.776	266.248	235.378		218.677	252.507	225.021	203.893	259.362	299.007	214.527		268.563	310.157	215.57	215.055	274.478	251.134	279.625	270.565	384.954	368.342		213.082	271.728	237.677		233.605	267.325	240.783	248.858	266.595	264.241	306.416	279.636	229.215	422.706	268.568	308.179	380.204	265.69	328.631		254.877	254.494
571.478		392.22	240.718	368.359	274.667	266.902	238.015			245.951	223.827	206.183	264.575	298.534	212.062		267.258	306.68	211.692	212.826	278.837	252.989	280.287	242.396	381.113	363.981		217.784	278.132	244.765		238.66	265.211	239.438	245.317	266.795	260.584	298.972	279.033	219.741	422.997	268.935	313.985	379.974	262.963	326.039		254.407	257.901
579.026	204.804	391.638	240.127	368.651	266.263	265.509	227.455			247.547	223.964	208.264	267.122	296.563	210.538		269.264	307.43	214.473	213.051	285.495	246.201	285.019	233.108	380.961	361.454		233.163	274.803	250.849		228.967	263.668	245.41	246.34	267.01	282.149	316.13	274.939	224.479	421.547	268.956	314.83	382.523	266.397	329.725		255.006	264.491
586.515	203.238	386.548	241.568	368.635	277.244	263.19	217.155			256.953	224.146	210.194	259.872	299.621	213.753		264.254	305.308	210.933	211.4	286.244	253.962	279.857	229.172	382.87	360.146		222.227	270.055	249.7		233.404	257.892	240.896	246.658	266.408	279.94	320.558	273.75	224.244	421.729	267.688	307.858	387.962	263.934	322.457		256.308	265.36
593.942	206.38	373.98	235.593	357.868	274.501	262.429	215.425			260.997	230.893	205.113	258.298	292.134	212.199		262.471	308.368	210.767	207.195	284.171	250.366	277.654	250.095	377.827	352.248		219.6	269.071	249.134		226.761	251.16	236.582	240.84	256.667	263.092	308.834	258.034	216.948	418.999	268.401	300.102	378.229	258.177	319.995		249.602	256.755
601.471	208.416	376.084	237.806	364.894	269.475	264.747	211.851			273.438	226.394		251.302	291.912			260.428	314.418	211.518	205.056	284.983	249.391	281.845	235.073	382.292	348.774		223.125	273.992	264.143		229.166	249.633	239.092	250.81	249.089	256.63	318.644	255.264	222.796	422.305	270.377	300.213	378.659	257.066	325.904		247.967	261.69
609.053	203.4	379.173	234.458	358.564	273.944	260.63	215.804			274.832	224.637		255.258	295.204	209.077		261.227	313.394	211.177		290.43	255.22	284.859	246.651	381.613	346.099		233.812	286.927	261.106		224.537	245.688	239.145	254.17	245.467	258.7	310.275	259.474	213.391	419.796	267.027	308.568	378.028	255.091	326.886		243.779	264.886
616.633	209.308	381.086	239.187	362.013	271.889	260.879	223.807			276.443	226.65		260.215	295.331	210.923		258.613	315.612	213.169	206.266	291.103	255.045	282.162	251.889	383.236	341.229		267.521	279.853	261.513		223.144	241.617	239.175	250.968	250.888	255.957	306.499	253.756	225.087	420.383	271.12	309.355	380.998	245.563	326.027		238.975	272.54
624.236	214.582	375.6	232.874	363.801	260.697	261.259	221.206			277.268	224.941		248.097	299.567			272.462	314.243	211.274		285.021	249.745	282.958	250.174	386.584	339.998		291.639	268.286	262.562		218.385	247.495	236.855	247.922	256.588	264.665	302.083	256.83	226.612	419.92	272.544	306.33	384.317	246.868	322.465		241.002	265.603
632.051	222.357	376.89	231.441	359.85	266.99	258.89	224.302			278.612	224.849		248.123	297.794	210.446		271.385	306.023	214.595	205.102	276.458	254.213	278.674	240.742	382.124	335.516		293.277	274.613	248.859		216.052	250.276	234.701	245.643	255.149	272.211	308.201	255.901	229.858	418.307	270.833	297.748	386.746	243.908	322.243		238.989	260.624
[truncated: 96 more columns]
