# Supplementary material for: Sustained store-operated calcium entry utilizing activated chromatin state leads to instability in iTregs
Source: eLife journal article supplement (doi:10.7554/elife.88874), 2023-07-04
Supplement: fig2-data2 [file 50min iTreg.xls]

## Sheet: Intensity Mean
Intensity Mean
Time [s]	Intensity Mean::1000015885	Intensity Mean::1000015886	Intensity Mean::1000015887	Intensity Mean::1000015888	Intensity Mean::1000015889	Intensity Mean::1000015890	Intensity Mean::1000015891	Intensity Mean::1000015892	Intensity Mean::1000015893	Intensity Mean::1000015894	Intensity Mean::1000015895	Intensity Mean::1000015896	Intensity Mean::1000015897	Intensity Mean::1000015898	Intensity Mean::1000015899	Intensity Mean::1000015900	Intensity Mean::1000015901	Intensity Mean::1000015902	Intensity Mean::1000015903	Intensity Mean::1000015904	Intensity Mean::1000015905	Intensity Mean::1000015906	Intensity Mean::1000015907	Intensity Mean::1000015908	Intensity Mean::1000015909	Intensity Mean::1000015910	Intensity Mean::1000015911	Intensity Mean::1000015912	Intensity Mean::1000015913	Intensity Mean::1000015914	Intensity Mean::1000015915	Intensity Mean::1000015916	Intensity Mean::1000015917	Intensity Mean::1000015918	Intensity Mean::1000015919	Intensity Mean::1000015920	Intensity Mean::1000015921	Intensity Mean::1000015922	Intensity Mean::1000015923	Intensity Mean::1000015924	Intensity Mean::1000015925	Intensity Mean::1000015926	Intensity Mean::1000015927	Intensity Mean::1000015928	Intensity Mean::1000015929	Intensity Mean::1000015930	Intensity Mean::1000015931	Intensity Mean::1000015932	Intensity Mean::1000015933
0	190.915	175.65	251.47	224.786	310.846	192.197	447.893	311.858	275.765	189.316	207.855	331.313	234.387	197.486	235.525	314.973	186.192	358.653	247.265	372.407	308.311	171.55	412.615	302.047	356.58	327.267	402.286	490.675	218.381	331.642	322.137	195.458	194.272	357.632	207.318	315.865	243.068	305.972	264.058	214.826	235.367	254.037	361.306	260.864	265.164	331.508	226.999	332.514	205.821
9.138	186.003	187.226	251.464	215.659	298.793	202.461	425.917	314.451	271.347	185.488	197.886	322.975	228.898		229.382	316.859	187.242	359.002	251.856	371.606	305.177	173.307	412.836	307.222	344.54	345.37	390.81	463.437	213.377	344.356	329.003	197.357	183.295	368.16	210.672	310.693	239.074	303.551	268.314	210.216	233.015	250.465	353.648	255.789	245.636	341.279	227.467	337.213	207.488
17.252	185.294	186.609	247.77	211.905	302.591	200.227	428.788	323.363	268.859	189.983	184.537	326.545	231.757		230.962	303.459	193.862	365.627	251.362	384.485	305.47	171.782	410.074	306.64	337.729	340.03	385.666	451.914	215.874	344.356	329.133	190.699	196.444	370.232	209.686	311.872	248.511	300.289	272.169	212.88	231.452	257.463	364.118	259.088	253.319	334.188	227.583	325.884	203.369
26.481	183.246	173.918	249.996	212	295.158	200.475	434.394	327.326	277.813	178.213	191.262	324.834	227.386	198.383	223.107	312.462	193.602	370.198	245.602	372.885	304.419	173.212	407.698	308.116	339.103	339.117	380.688	436.997	216.213	320.315	304.123	200.444	191.347	366.338	206.945	306.901	254.694	287.383	271.863	210.415	233.327	256.958	369.099	256.844	255.327	320.309	223.421	318.211	199.315
34.502	180.361	170.335	245.583	213.915	295.826	201.672	436.37	342.255	281.164	187.23	191.313	318.733	232.925		218.218	301.782	199.382	371.534	241.625	372.109	311.164	171.192	402.319	312.938	350.309	331.327	401.481	433.817	218.373	310.98	297.052	196.222	194.654	366.372	207.166	307.563	246.175	289.721	276.262	202.682	235.612	253.763	370.903	265.912	251.963	314.269	228.85	310.547	198.874
42.523	184.755	169.349	243.288	221.214	286.62	198.085	456.62	337.501	273.073	186.949	180.893	325.742	233.845	202.26	213.773	307.081	193.834	366.891	244.374	379.441	314.53	170.838	401.471	312.176	347.817	320.488	403.986	442.166	220.835	294.149	299.89	200.498	193.932	362.67	208.819	306.431	253.618	298.047	274.376	206.076	233.162	251.522	356.093	261.189	259.832	308.884	237.11	308.218	199.397
50.598	185.917		246.902	216.706	271.748	198.215	442.506	329.269	252.797	186.663	188.366	336.428	236.11	204.723	214.386	311.783	188.884	371.158	246.812	376.482	316.704	171.12	395.266	296.371	347.859	320.691	403.871	446.707	219.412	287.304	314.869	200.561	189.219	364.157	204.438	306.99	253.773	292.616	273.418	201.258	230.281	249.394	365.305	249.176	245.159	309.658	234.184	310.996	201.064
58.872	182.955		241.381	218.152	259.905	194.741	444.813	318.209	263.035	189.427	188.919	335.621	235.352		211.17	320.789	187.657	364.06	250.173	373.183	327.864	172.627	392.05	291.052	331.83	308.956	383.567	447.182	213.32	284.059	316.77	197.733	189.196	354.528	206.652	295.098	252.059	286.217	261.59	196.095	227.935	241.652	366.875	245.679	240.324	309.477	230.599	310.886	198.757
67.201	180.403	169.508	230.599	228.223	257.048	191.886	441.114	314.645	275.877	181.527	190.843	338.24	236.603		210.25	323.458	183.448	358.067	244.324	355.174	327.113	171.845	392.021	304.709	347.347	336.598	387.184	446.211	212.544	286.199	317.258	186.046	188.516	351.542	206.913	294.207	246.365	285.948	255.578	185.889	228.704	250.648	354.834	252.373	231.416	307.337	230.234	303.506	211.099
75.54	179.695	172.267	224.402	234.591	247.43	203.28	431.148	316.824	282.778	188.21	187.746	325.993	227.375	199.935	213.771	323.441	187.136	352.482	245.486	357.541	332.421	173.703	395.751	314.152	339.161	332.469	386.089	459.276	212.707	281.53	299.632	198.952	190.114	365.321	209.441	296.684	252.894	287.303	255.188	186.313	230.1	246.957	351.927	265.465	239.249	295.193	229.589	311.653	212.734
83.866	178.191	172.269	228.985	226.792	245.251	199.763	440.15	316.943	267.25	180.161	182.204	320.876	222.868	202.211	217.104	311.1	189.395	354.049	243.306	363.487	334.999	176.218	391.18	319.379	319.251	321.221	385.998	471.003	218.713	285.863	295.403	189.766	199.165	364.413	207.701	290.303	252.322	296.557	249.549	193.006	229.481	251.462	365.858	262.769	250.978	285.108	228.644	304.914	211.73
91.903	178.914	169.903	235.327	221.135	242.6	198.274	436.906	307.932	267.971	180.647	178.432	322.164	220.192	195	215.393	312.233	192.434	350.721	243.546	378.918	333.197	173.359	388.606	313.965	284.496	303.578	393.113	459.293	224.583	287.948	309.057	196.199	202.344	351.652	204.354	283.166	246.879	298.621	245.965	194.643	232.088	240.308	374.302	257.705	255.385	275.149	226.213	300.836	210.713
99.941	177.17	167.167	238.786	215.063	245.023	207.016	431.714	316.631	257.977	184.491	180.667	311.283	230.986	194.282	214.976	309.358	186.943	349.473	245.79	385.416	318.316	173.775	382.483	313.001	283.468	299.883	392.253	458.927	221.68	266.973	305.382	197.084	206.761	341.71	202.992	286.684	237.445	297.09	236.604	200.216	230.84	240.95	351.57	256.151	255.739	275.42	226.341	293.842	211.498
108.012	179.499	170.705	240.678	213.315	241.717	211.231	444.021	314.815	242.055	178.743	179.965	323.548	245.281	193.928	213.537	312.069	186.323	346.133	248.924	385.737	311.856	176.331	374.502	314.43	286.551	309.495	403.232	452.605	216.948	257.665	300.222	189.53	210.017	333.759	207.777	275.864	239.479	295.667	218.365	204.957	226.143	244.211	373.394	261.878	253.288	292.601	229.055	304.658	209.679
116.385	176.58	176.083	236.614	214.097	233.873	209.535	447.276	321.767	261.992	181.622	180.452	335.141	240.236	194.264	213.531	307.503	189.947	348.899	251.278	389.42	301.497	175.293	382.41	312.749	284.555	317.753	412.374	460.39	216.333	264.341	303.591	192.473	210.789	346.739	210.722	278.398	233.968	300.746	220.086	197.465	234.147	246.229	369.762	271.961	234.889	303.07	227.705	311.706	208.583
124.444	178.208	173.748	239.405	216.839	229.448	206.99	445.561	316.508	272.164	180.083	178.393	345.511	239.582	194.863	212.412	295.943	190.124	359.769	247.983	378.218	296.596	175.101	383.719	323.007	286.09	317.748	419.303	458.922	215.072	278.293	302.284	204.363	210.549	354.065	210.486	275.567	236.819	302.24	218.018	194.404	231.419	246.248	358.71	277.112	245.831	312.679	225.96	300.894	208.887
132.491	177.121	174.807	239.676	222.372	239.249	209.463	443.562	318.013	290.941	186.589	179.512	352.418	239.656	200.675	212.392	289.069	193.582	365.893	247.572	370.112	303.558	173.325	376.991	319.901	268.898	333.044	426.04	476.639	213.686	277.136	318.515	199.366	212.165	347.239	207.702	260.616	230.548	297.833	215.029	203.098	228.736	249.217	350.457	284.135	258.553	309.743	229.934	296.944	206.922
140.486	181.55	170.901	246.963	221.403	233.365	211.575	418.639	318.546	304.214	184.139	178.156	337.744	234.298	195.41	213.165	291.504	197.627	363.515	249.856	357.726	310.096	170.159	384.586	307.758	292.307	326.77	406.024	471.382	211.507	281	323.224	189.787	213.577	350.906	205.648	257.892	235.1	295.216	209.471	204.764	232.025	251.471	358.895	282.675	263.039	309.212	229.096	286.204	205.934
148.809	182.564	167.456	250.504	215.211	244.93	213.611	403.7	322.067	317.554	184.368	185.697	340.312	238.854	195.203	213.618	300.307	196.546	362.283	251.472	363.778	312.614	170.6	381.799	297.402	335.504	304.514	388.376	479.576	207.413	311.039	312.349	185.729	212.826	333.837	206.168	252.211	232.614	294.85	206.897	219.304	231.846	249.871	351.445	285.001	266.481	301.544	222.374	279.844	209.627
156.891	183.429	171.88	251.375	218.084	243.845	211.404	408.934	322.611	330.167	179.3	180.067	332.192	230.21		213.278	303.074	198.779	356.621	253.008	341.009	314.566		378.624	282.5	363.821	308.826	400.658	476.319	209.9	316.014	304.058	184.274	212.18	333.819	206.611	253.612	237.696	290.673	204.962	223.017	240.184	252.005	358.588	291.672	265.118	283.612	223.543	269.599	207.706
165.008	183.471	174.666	258.249	210.748	237.376	210.1	424.56	315.689	327.47	180.362	178.555	314.665	230.695	192.481	210.3	299.697	193.113	354.773	250.857	356.232	307.556	168.895	369.376	278.109	366.142	293.704	426.868	463.368	209.552	339.402	306.316	187.149	209.663	326.822	207.095	253.144	244.212	287.431	200.833	225.401	234.545	251.206	357.754	291.302	254.967	282.355	223.628	270.737	211.207
173.484	188.592	173.717	257.762	215.677	243.873	224.296	421.112	304.383	314.357	185.394	178.86	287.438	229.29	194.278	207.708	296.713	184.375	357.2	253.003	368.188	300.703	169.882	370.308	275.401	366.714	304.185	406.072	452.844	211.134	333.383	308.508	187.773	202.504	311.523	209.053	251.852	246.73	297.51	205.358	227.629	229.281	254.305	352.497	280.092	255.477	275.038	222.552	270.652	213.317
182.136	197.098	176.954	252.289	218.823	251.27	224.424	426.56	310.118	299.164	190.759	181.473	276.314	233.564	194.669	213.128	307.302	186.579	362.897	251.11	382.462	294.314		370.542	282.777	341.507	341.083	388.73	461.694	209.962	325.722	306.42	191.399	196.319	311.885	212.238	257.439	245.501	301.015	204.451	236.026	231.709	250.586	356.477	285.155	257.763	282.542	228.22	271.09	212.862
190.267	200.543	171.291	249.832	225.312	253.798	220.127	423.093	319.457	308.341	193.583	185.37	268.566	225.893	186.302	215.572	301.149	184.978	368.489	247.275	383.3	297.723		376.838	277.858	338.761	355.424	359.88	462.05	206.882	329.283	304.095	198.682	204.086	320.687	213.595	253.94	230.196	295.686	198.132	242.003	240.173	253.152	356.676	286.042	261.258	288.596	224.138	281.188	209.922
198.42	208.454	167.418	248.781	221.275	261.318	215.245	439.246	321.556	302.262	187.8	180.843	255.493	211.45	192.437	220.71	304.235	185.603	379.737	240.004	365.728	294.298		379.652	289.314	340.45	353.018	326.376	453.649	211.204	326.286	317.811	197.534	205.983	337.971	206.516	250.521	220.244	293.065	196.709	241.498	233.584	256.506	376.639	283.315	262.105	277.522	215.898	285.45	207.913
206.562	213.271		246.385	225.159	256.849	224.134	438.065	309.36	298.221	185.389	190.446	247.831	199.827	192.022	210.434	303.423	188.305	379.536	236.554	372.161	294.644	169.066	378.605	296.31	329.129	344.91	346.14	467.888	219.03	322.331	330.88	201.427	202.827	337.388	200.896	253.044	230.987	299.476	195.435	246.36	236.398	249.537	380.47	282.528	253.381	264.965	212.061	289.601	201.983
214.623	217.636	168.197	246.496	223.082	254.324	231.391	430.909	308.032	299.055	184.436	185.337	245.424	204.452	195.5	209.154	310.845	189.786	393.477	237.597	362.147	302.576	169.548	374.11	293.473	323.885	364.522	373.325	469.22	221.209	321.526	322.646	193.63	207.997	354.241	205.045	248.068	225.974	298.692	196.732	243.975	237.276	257.128	373.887	286.499	250.888	265.214	211.69	287.386	209.567
222.751	213.917	173.6	246.962	220.324	263.638	235.843	423.589	323.047	293.781	188.621	182.261	252.272	200.116	196.056	213.584	316.239	194.037	439.082	237.591	365.62	306.897	169.98	390.033	295.615	308.239	358.563	392.253	469.818	217.614	319.068	309.488	195.487	209.901	357.876	207.021	245.972	240.231	291.971	197.719	244.21	239.955	260.062	376.28	290.335	254.649	274.3	206.199	293.275	221.825
230.968	219.155	180.191	250.882	221.697	287.128	241.732	425.974	318.932	291.611	186.736	185.379	254.322	221.407	195.741	210.746	314.634	192	508.196	239.854	361.731	306.083	170.243	391.773	289.192	278.103	358.529	387.165	469.519	211.733	325.716	305.033	198.529	207.336	349.114	207.905	251.266	245.349	289.767	194.938	243.442	241.582	261.029	375.725	290.138	249.531	278.958	195.096	290.095	215.514
239.416	218.288	179.595	250.22	218.188	306.213	239.451	429.954	312.541	289.581	183.156	185.233	259.888	226.814		212.797	308.952	198.324	546.097	233.278	366.144	289.838	168.914	391.401	288.134	271.946	337.315	378.206	477.598	211.556	333.748	311.011	197.649	206.585	352.244	207.176	251.95	246.267	302.172	192.543	238.471	229.625	253.934	395.814	279.014	241.251	296.768	192.678	287.385	215.892
248.791	218.412	177.733	251.51	224.391	332.131	223.239	416.717	308.197	297.402	188.48	182.928	278.133	238.749		211.472	311.091	192.574	538.788	226.665	370.535	292.927	171.504	395.268	292.707	276.393	338.482	381.772	488.183	216.82	344.545	297.033	199.237	204.119	366.65	208.162	259.323	250.386	298.008	197.438	238.283	237.171	247.492	391.439	280.398	231.878	299.276	184.27	286.478	216.655
258.216	215.815	175.737	254.316	221.444	353.219	228.326	413.345	304.191	294.123	193.087	187.465	277.056	235.445		208.64	311.193	191.673	468.818	229.392	374.899	293.049	169.991	390.109	296.354	270.48	343.981	378.319	496.067	211.945	353.223	304.181	201.132	202.426	363.961	210.375	267.951	246.818	300.704	199.344	239.836	240.584	242.841	400.381	285.928	230.828	310.63	182.443	282.861	217.65
266.992	217.128	183.312	256.671	218.56	359.087	224.879	428.302	307.859	301.894	192.414	195.459	294.54	233.462	190.063	207.781	311.734	187.204	407.775	229.089	370.547	289.985	169.575	389.38	313.224	266.092	321.038	374.063	487.52	214.422	362.044	318.62	207.921	199.189	356.684	205.311	272.215	240.002	299.361	200.327	236.296	246.195	249.639	402.317	285.927	228.252	323.423	176.917	274.7	211.89
275.928	217.345	181.217	258.391	217.329	363.079	219.831	430.324	314.315	306.506	185.878	198.438	297.045	224.676	198.152	207.455	306.838	187.535	365.556	231.065	372.163	289.543	170.761	386.542	315.077	283.595	324.685	364.924	459.73	214.085	363.261	310.501	200.941	203.543	345.091	207.316	278.379	237.647	297.508	196.291	232.183	245.482	247.953	384.98	290.178	220.852	321.158	177.054	276.209	207.988
284.784	222.168	176.701	254.384	217.317	366.837	221.082	442.389	315.083	291.923	184.893	185.513	279.275	224.635	197.218	210.775	305.814	192.619	345.824	234.309	377.114	295.689	169.723	385.221	301.339	271.284	331.135	364.41	450.643	215.278	338.247	308.082	198.836	202.653	343.282	198.899	292.751	249.677	285.684	190.234	234.856	244.695	244.587	374.09	291.629	217.737	320.265	176.103	271.778	205.479
293.447	218.406	179.744	251.443	216.358	361.714	223.603	434.168	312.104	291.914	178.8	183.63	264.782	221.891	195.656	214.258	302.415	187.982	337.802	247.904	380.365	297.477	169.481	396.994	305.54	264.027	312.995	367.958	457.059	219.154	337.256	290.609	199.17	204.332	342.22	200.858	304.376	246.096	288.623	189.132	237.56	245.201	244.135	376.164	283.634	209.476	318.511		277.851	205.271
302.046	212.189	176.215	248.772	219.483	365.521	225.949	421.747	308.116	292.073	179.076	185.082	255.913	221.421	196.112	217.681	303.808	180.792	332.87	261.049	374.41	296.564	169.404	398.868	308.984	261.354	306.369	356.366	460.529	223.844	332.897	310.766	199.074	202.88	341.212	209.524	314.68	251.495	290.818	189.904	237.693	237.006	241.23	369.679	279.779	203.048	328.6		277.087	209.583
310.714	214.119	175.219	244.629	212.135	379.338	233.46	429.843	304.731	302.766	184.183	182.446	259.772	222.747	188.529	219.405	301.183	187.332	334.145	272.687	362.814	307.808	169.112	395.273	313.879	269.017	317.231	356.801	467.892	226.899	353.818	314.89	189.973	199.991	337.857	207.089	315.052	245.655	294.09	192.911	239.667	232.718	243.852	389.318	287.726	196.119	336.803		273.507	210.537
319.573	213.162	173.612	239.344	211.122	374.449	228.83	417.588	303.73	294.958	180.79	185.814	267.843	219.253		223.538	300.554	184.175	338.312	346.868	376.949	311.187	170.067	392.635	299.51	268.922	325.483	355.661	476.06	222.944	340.733	288.473	196.27	201.714	329.384	212.567	310.325	243.983	296.025	194.873	243.594	228.086	243.997	379.011	288.947	195.698	335.743		272.545	211.56
328.35	215.256	167.805	244.234	212.152	365.444	231.718	439.368	304.959	299.894	191.671	178.894	271.792	217.4	195.119	238.329	299.265	184.37	344.783	311.546	381.947	313.552	172.548	394.488	296.761	265.439	342.559	352.379	462.078	221.079	330.01	291.876	195.463	192.075	330.053	212.377	306.435	248.803	298.022	195.246	241.22	229.605	242.524	382.077	289.945	192.708	335.495		270.39	215.902
337.409	221.835		246.567	217.645	362.703	254.42	450.722	302.546	286.554	179.958	179.179	295.853	221.943	192.439	237.458	291.767	187.731	343.306	277.786	375.868	313.459	176.312	402.324	289.746	261.09	339.793	347.033	478.899	219.109	329.099	307.797	193.666	202.264	329.995	209.215	319.983	255.026	286.092	195.821	240.482	227.993	243.479	385.665	290.262	189.069	332.34		266.043	225.485
345.982	218.521	172.535	249.37	211.987	362.018	268.826	439.152	309.927	284.304	187.934	181.589	317.547	215.804	194.519	232.773	288.094	184.558	351.335	260.03	366.269	307.388	175.446	402.429	279.24	261.174	333.977	341.84	480.157	214.823	338.791	321.673	198.673	207.795	312.211	210.194	328.699	260.712	294.221	202.511	236.624	235.073	243.07	372.759	281.893	188.252	329.315		277.351	219.232
354.913	210.926	175.556	245.429	207.337	355.472	292.522	435.516	313.679	290.086	177.937	183.84	319.787	212.232		224.291	292.713	190.533	354.252	247.442	386.304	311.828	175.983	400.798	282.695	267.035	345.636	344.476	461.125	213.327	326.494	301.83	198.231	200.012	340.425	210.583	327.291	252.759	293.741	211.089	234.981	221.562	246.49	378.514	278.712	185.865	327.776		286.63	218.674
364.034	210.724	167.305	246.387	210.843	346.168	317.204	439.276	313.033	294.27	181.814	181.94	317.177	217.511		221.068	293.639	186.823	352.549	238.958	373.485	302.906	177.282	393.942	279.139	282.721	327.105	332.888	457.193	216.966	319.555	294.144	196.478	195.543	349.172	208.882	324.26	243.48	292.255	217.39	227.245	216.908	247.365	391.587	280.976	181.963	326.821		276.277	216.923
373.044	216.258		241.787	211.066	348.455	321.051	451.553	313.423	295.362	180.769	185.985	291.842	222.512		224.96	292.167	182.846	361.115	235.73	383.142	299.483	175.012	391.324	276.981	324.999	327.526	325.524	443.254	216.566	303.103	305.096	201.984	195.532	339.386	202.425	320.855	238.062	294.07	216.977	222.049	226.776	254.484	375.777	287.676	182.78	329.886		264.709	219.02
381.801	216.046		239.533	211.685	344.309	319.181	447.546	295.357	295.154	179.833	189.766	293.36	220.626	198.969	235.34	297.334	190.18	364.454	235.443	380.333	295.896	180.051	396.884	284.419	384.519	329.969	315.073	445.209	212.887	315.7	309.434	204.97	195.911	346.545	206.449	319.838	238.837	290.785	226.012	222.809	231.386	256.486	389.688	289.43	179.572	337.967		282.925	218.041
390.341	216.184	168.707	240.856	215.829	350.788	316.503	441.603	307.888	285.046	189.035	186.205	288.149	211.951	198.59	238.773	298.369	193.015	369.522	274.462	386.649	300.497	184.563	404.714	287.543	405.451	355.28	308.464	446.834	215.389	331.318	318.283	202.236	211.271	344.024	206.373	325.715	240.454	289.595	239.187	228.058	232.731	249.652	386.607	288.454	177.896	341.168		297.508	218.105
399.13	215.314	173.882	240.24	212.789	359.241	311.364	436.935	310.848	282.752	178.906	180.677	281.886	219.196		254.9	289.464	191.474	374.802	272.836	382.733	301.06	181.243	401.249	288.674	395.737	355.107	311.351	455.413	212.169	344.965	321.452	203.778	207.839	342.123	209.533	329.878	243.16	290.152	246.717	228.719	229.291	252.987	379.432	291.476	180.29	334.096		303.02	214.917
407.704	217.708	175.066	240.085	220.677	360.861	313.685	427.532	314.056	286.618	177.709	177.825	267.602	220.38		278.466	292.188	187.331	366.184	263.454	372.679	304.941	182.564	406.715	287.271	372.385	357.706	310.013	459.09	212.867	354.601	307.323	197.594	207.388	336.783	208.391	330.534	245.699	290.6	253.395	229.936	225.077	246.579	368.157	272.367	183.922	339.232		295.458	214.229
416.663	211.39	172.904	235.062	218.433	353.523	299.288	441.131	302.208	296.177	181.384	179.42	264.606	215.921		302.302	292.145	187.113	365.833	259.632	365.336	301.501	183.134	406.842	281.791	365.835	363.466	296.634	459.868	211.833	351.656	291.686	190.098	210.624	347.081	210.069	333.453	247.749	294.924	260.098	225.353	233.149	244.28	374.96	275.29	186.322	338.557		299.746	217.035
425.061	210.243	170.553	236.375	214.484	334.748	297.442	441.028	295.367	295.983	176.413	178.816	260.121	211.042		314.457	288.65	185.354	363.218	248.47	350.165	302.851	180.128	409.975	283.622	347.332	335.265	286.53	447.097	217.604	334.789	278.319	196.592	207.318	339.55	211.748	327.503	248.759	291.642	257.04	217.065	226.307	246.668	368.233	283.213	185.169	331.629		301.746	221.327
433.949	209.907	168.981	238.501	212.435	326.288	288.866	426.767	295.814	293.29	181.576	179.407	260.125	217.143		309.726	291.745	183.325	361.058	244.434	372.741	308.762	178.19	404.164	283.815	327.109	331.426	280.379	450.328	216.774	315.727	299.414	200.935	206.135	336.682	209.105	323.318	245.509	292.689	249.236	222.566	225.799	236.619	381.942	292.188	188.294	326.764		299.537	225.966
442.831	206.522	168.262	234.829	203.614	312.546	287.991	416.829	296.936	291.015	178.105	186.754	279.224	225.643		297.593	292.845	184.422	372.434	237.794	368.475	308.329	180.27	418.995	278.636	312.921	314.997	271.096	445.351	217.588	296.137	313.232	198.472	208.299	350.679	206.419	319.226	240.131	289.29	243.327	223.316	223.001	232.715	355.876	285.735	195.25	323.343		295.587	229.716
451.398	212.169	169.308	237.247	207.702	304.246	277.427	428.519	301.423	288.313	176.858	183.419	286.756	218.959		289.571	298.754	187.853	370.315	234.506	380.623	302.96	177.335	414.12	279.407	307.168	331.788	270.957	450.413	212.69	308.873	299.909	194.398	210.099	342.95	207.101	326.038	238.924	293.557	244.231	224.704	226.061	232.664	368.259	278.473	201.003	335.552		292.427	225.22
459.914	213.569	167.972	234.789	203.719	312.007	244.869	418.326	314.505	286.753	177.167	188.764	284.188	222.29		278.233	293.59	182.623	367.03	236.13	366.85	306.727	178.031	422.01	280.319	288.291	325.342	267.023	459.31	210.648	266.38	297.555	191.579	209.359	335.645	204.726	328.284	241.454	287.475	244.607	222.139	224.964	234.541	364.272	274.304	199.1	328.64		285.085	221.497
468.476	215.379	171.642	236.522	204.402	324.172	224.181	417.204	322.382	288.365	176.356	189.181	283.878	218.767		268.72	281.727	185.429	370.581	234.352	362.05	294.888	185.194	419.685	289.57	272.212	324.458	265.703	472.677	210.129	279.746	297.99	190.699	208.413	345.098	201.587	332.176	240.192	289.095	251.67	236.04	226.057	244.977	358.414	279.103	201.966	332.405		283.611	216.552
477.065	212.553	168.162	244.341	208.901	338.548	225.943	393.974	319.687	278.908	182.008	191.609	295.477	224.119		251.514	291.028	183.354	367.165	231.482	356.88	292.783	184.929	414.002	300.71	269.418	344.543	266.324	472.545	209.466	281.989	302.591	197.9	204.633	344.87	200.588	321.835	245.884	291.427	265.371	233.991	227.188	253.832	361.674	279.094	205.469	327		280.829	218.374
485.634	211.122	167.498	245.456	214.876	333.054	230.268	416.497	315.822	273.36	176.764	185.893	296.844	218.979		247.933	294.82	183.354	368.161	232.353	364.828	292.905	182.378	410.301	293.384	264.061	340.629	263.313	474.442	212.097	278.603	292.085	192.902	210.68	345.431	204.956	319.206	249.924	308.413	271.2	235.447	219.649	248.219	360.232	284.637	206.252	329.202		286.897	223.536
494.134	204.639		244.978	217.372	323.938	235.566	422.872	321.111	280.506	175.573	183.301	269.437	216.96		244.862	307.219	186.323	363.582	231.971	368.676	290.994	188.64	406.289	283.57	268.33	341.267	266.007	470.436	211.775	295.2	305.304	198.572	210.604	363.062	206.963	324.688	249.379	301.915	273.389	235.405	209.48	245.572	380.23	288.548	208.113	331.02		284.625	218.801
503.063	203.737	168.427	236.662	215.649	301.227	244.729	422.372	308.777	273.405	184.386	187.036	252.642	224.718		252.059	300.926	185.118	362.953	234.869	376.708	281.342	187.887	401.977	287.978	271.691	318.982	265.016	468.176	206.264	333.625	292.499	201.632	203.676	354.516	207.434	323.327	248.966	300.031	267.75	231.47	211.439	243.871	383.474	291.444	216.285	328.527		288.648	217.922
512.014	200.486	174.476	237.784	207.679	286.672	286.231	425.688	296.087	257.354	175.471	193.183	242.007	229.509		271.945	297.342	185.321	364.302	231.973	370.185	277.71	193.017	404.141	295.42	291.184	343.756	263.978	461.89	207.117	327.219	278.089	196.878	195.826	343.267	203.174	324.269	253.244	294.581	266.733	224.586	211.843	249.121	375.985	275.932	224.977	319.93		283.526	218.298
520.552	198.891	177.193	240.072	204.882	288.064	309.245	434.117	312.912	267.576	185.31	191.926	234.49	219.244		284.049	308.04	188.821	367.747	231.798	372.46	277.849	191.907	400.107	299.831	334.307	326.989	264.235	456.915	211.988	339.459	289.913	204.985	198.088	349.4	202.906	336.547	251.033	288.344	268.903	223.305	218.308	247.605	392.069	266.658	227.544	319.279		280.708	217.321
529.04	201.362	173.394	238.467	205.916	314.505	311.526	427.978	304.009	270.186	182.794	185.779	234.448	220.581		293.952	317.12	185.957	372.838	234.654	359.613	276.834	193.845	400.468	285.908	357.209	345.459	266.996	459.643	210.721	325.576	282.925	201.522	205.6	336.719	206.218	337.683	244.171	282.839	270.151	218.017	222.016	248.035	375.363	274.253	223.448	330.178		280.586	222.638
537.894	198.305	168.927	241.156	212.55	345.295	306.592	417.945	298.275	270.557	175.322	192.16	235.324	220.085		292.428	316.409	181.643	372.727	234.071	352.427	276.885	195.567	395.426	275.163	346.438	326.459	260.234	451.638	214.426	339.252	287.903	192.533	208.812	343.636	205.393	335.67	238.388	282.565	264.247	221.087	224.421	239.851	372.495	281.09	215.388	333.778		286.458	214.856
546.324	196.641	169.854	235.083	214.728	348.484	306.238	417.336	315.774	270.137	179.371	183.877	231.696	224.532		291.911	317.669	184.488	380.389	233.318	353.597	273.846	196.237	386.674	270.848	367.02	322.451	258.438	463.211	217.921	337.848	296.376	195.516	202.984	349.697	205.947	331.008	243.354	287.76	264.198	227.407	223.439	243.216	368.507	279.843	213.594	333.85		281.852	212.848
554.789	200.835	169.075	238.558	214.148	358.761	295.632	430.092	308.899	280.517	180.512	192.479	227.32	219.184		287.338	310.096	186.17	377.227	236.856	367.529	280.238	188.984	387.002	276.151	378.42	316.622	261.639	470.61	210.932	337.421	315.803	190.138	203.924	345.531	205.011	329.675	249.859	282.461	270.532	233.005	228.463	248.476	363.831	277.29	226.536	338.815		279.626	218.344
563.133	197.145	172.293	241.551	214.609	358.388	285.739	430.606	294.972	284.535	175.177	191.016	224.981	214.791		279.833	309.663	187.676	379.363	236.728	377.539	277.991	186.809	392.294	270.372	380.216	324.904	259.874	461.076	208.726	324.461	312.984	191.216	199.184	353.936	206.56	331.02	249.532	271.383	269.4	237.573	225.483	242.833	374.292	275.398	223.366	335.197		281.408	218.1
572.038	195.801	167.773	240.399	216.425	352.88	273.707	415.541	292.702	284.269	179.854	190.324	226.851	214.408		270.599	316.295	185.122	373.806	238.231	377.609	290.301	182.326	391.956	265.155	375.625	320.945	254.999	445.283	208.214	323.386	290.756	188.812	199.665	337.17	208.383	332.715	245.94	261.124	269.167	233.52	219.219	242.93	364.459	273.682	224.673	327.75		288.914	221.602
580.818	197.723	170.896	243.739	208.579	346.467	258.801	403.934	299.325	283.251	173.509	186.614	224.711	213.828		244.739	312.468	185.263	367.66	236.649	384.451	290.991	186.148	397.742	264.354	371.236	332.905	255.65	437.923	217.393	327.069	288.454	196.511	199.423	329.947	203.051	327.771	249.77	272.7	267.67	237.056	219.509	236.379	359.456	278.744	221.757	323.271		284.193	225.747
589.711	194.181	174.046	244.945	209.385	332.799	237.379	417.354	306.434	265.885	185.976	190.962	227.149	223.409		227.376	313.281	183.064	364.308	236.81	381.725	280.726	182.683	403.316	270.634	364.287	340.945	263.929	435.273	218.423	308.713	282.475	191.152	206.633	340.356	198.395	329.046	240.624	284.559	263.322	241.189	223.045	236.021	376.53	280.827	231.432	321.353		275.389	221.545
598.245	195.927	170.889	237.409	206.125	322.09	213.243	413.54	304.57	268.735	179.764	181.596	229.514	221.856		226.681	312.56	180.959	366.732	235.948	374.29	287.103	182.927	404.247	273.2	364.672	326.145	266.684	436.672	222.809	341.285	285.83	197.621	202.345	328.808	203.426	332.236	231.213	279.236	262.868	243.416	230.054	235.094	375.34	285.845	235.832	319.929		262	219.484
606.719	191.355	170.196	240.567	205.723	326.48	218.308	420.958	309.346	270.397	180.716	179.045	236.114	220.737		234.861	302.356	183.444	367.294	234.99	368.218	285.721	183.111	407.513	270.428	346.62	336.128	264.249	438.861	218.928	333.671	294.996	191.984	204.34	320.534	209.894	325.496	238.896	279.027	263.344	238.613	227.887	233.432	386.716	295.992	234.198	310.836		253.792	221.32
[truncated: 46 more columns]
