# Supplementary material for: Sustained store-operated calcium entry utilizing activated chromatin state leads to instability in iTregs
Source: eLife journal article supplement (doi:10.7554/elife.88874), 2023-07-04
Supplement: fig2-data2 [file 50min Tconv.xls]

## Sheet: Intensity Mean
Intensity Mean
Time [s]	Intensity Mean::1000059515	Intensity Mean::1000059516	Intensity Mean::1000059517	Intensity Mean::1000059518	Intensity Mean::1000059519	Intensity Mean::1000059520	Intensity Mean::1000059521	Intensity Mean::1000059522	Intensity Mean::1000059523	Intensity Mean::1000059524	Intensity Mean::1000059525	Intensity Mean::1000059526	Intensity Mean::1000059527	Intensity Mean::1000059528	Intensity Mean::1000059529	Intensity Mean::1000059530	Intensity Mean::1000059531	Intensity Mean::1000059532	Intensity Mean::1000059533	Intensity Mean::1000059534	Intensity Mean::1000059535	Intensity Mean::1000059536	Intensity Mean::1000059537	Intensity Mean::1000059538	Intensity Mean::1000059539	Intensity Mean::1000059540	Intensity Mean::1000059541	Intensity Mean::1000059542	Intensity Mean::1000059543	Intensity Mean::1000059544	Intensity Mean::1000059545	Intensity Mean::1000059546	Intensity Mean::1000059547	Intensity Mean::1000059548	Intensity Mean::1000059549	Intensity Mean::1000059550	Intensity Mean::1000059551	Intensity Mean::1000059552	Intensity Mean::1000059553	Intensity Mean::1000059554	Intensity Mean::1000059555	Intensity Mean::1000059556	Intensity Mean::1000059557	Intensity Mean::1000059558	Intensity Mean::1000059559	Intensity Mean::1000059560	Intensity Mean::1000059561	Intensity Mean::1000059562	Intensity Mean::1000059563
0	256.829	251.545	294.006	517.335	255.986	377.629	381.26	255.863	293.923	254.181	295.913	248.855	352.822	422.219	278.913	303.406	280.858	266.752	244.593	234.613	291.421	245.904	487.091	244.676	319.17	331.19	290.036	243.844	348.606	295.882	253.004	353.296	315.441	297.527	302.99	348.531	507.422	260.394	232.263	315.439	453.385	332.486	332.367	332.842	285.123	387.611	285.675	279.837	259.665
8.93	263.17	258.716	283.54	520.811	261.184	353.77	389.663	256.068	296.489	265.081	293.451	251.316	350.219	426.283	270.819	315.67	282.095	274.25	242.511	236.177	272.725	246.727	514.079	238.323	336.377	337.926	283.964	235.444	355.177	290.664	246.385	356.666	313.435	303.485	304.295	349.754	497.059	275.86	249.352	300.079	444.798	329.678	333.41	316.438	297.486	389.422	272.962	273.212	262.186
17.583	253.025	261.548	283.205	525.777	267.528	348.409	395.804	260.093	303.161	272.212	290.208	252.667	351.735	427.125	279.977	296.335	287.807	276.348	227.311	231.511	292.007	244.466	514.35	239.189	352.196	324.478	280.548	242.896	335.108	291.77	243.96	357.146	298.99	297.174	300.793	360.912	499.398	270.443	249.026	305.45	445.21	327.884	332.366	299.412	299.733	361.991	283.306	278.524	260.681
26.634	257.004	260.668	305.193	526.492	262.908	337.374	411.634	277.475	294.723	271.333	279.046	249.851	337.022	425.895	270.343	281.798	290.104	276.796	223.226	239.267	290.478	241.972	489.499	234.492	361.948	324.511	277.96	242.188	341.956	295.08	234.557	351.351	274.402	290.382	302.469	355.585	512.549	281.946	257.337	299.185	436.424	323.203	327.07	273.654	289.968	384.089	280.283	269.303	263.797
34.902	250.834	242.684	293.412	522.663	268.489	346.526	417.171	265.502	288.615	275.386	286.993	243.929	341.465	424.337	273.682	284.276	292.819	268.344	236.109	243.645	288.25	241.865	499.824	236.452	345.304	325.136	278.819	244.037	334.468	288.125	230.557	347.834	268.702	301.538	297.176	344.324	522.019	303.087	265.137	293.98	427.203	323.048	326.231	281.508	284.698	379.254	293.71	265.036	265.243
42.982	263.302	236.873	283.993	525.832	267.5	357.555	412.066	254.871	285.469	265.6	284.717	245.22	347.652	423.346	276.285	276.395	278.015	272.868	254.698	245.509	278.9	252.925	514.913	226.379	353.477	316.377	272.133	246.401	326.611	295.892	236.116	350.923	269.673	295.274	285.671	352.652	518.802	311.781	270.787	278.982	433.23	319.383	327.736	272.426	278.639	389.587	274.392	261.213	247.472
50.989	253.19	256.649	300.55	522.593	250.076	354.544	410.167	252.292	292.586	262.249	283.108	242.257	345.31	425.915	271.821	272.09	275.594	266.878	256.643	247.587	272.881	244.254	519.222	225.805	334.4	320.298	274.488	252.469	331.728	294.31	235.89	348.654	266.409	283.893	273.357	346.393	527.085	313.264	259.481	289.554	428.059	320.157	327.845	255.365	286.872	367.391	271.47	268.149	237.626
59.017	244.369	272.712	298.532	526.335	252.221	341.716	395.872	243.591	285.448	259.282	276.564	239.668	333.602	425.851	274.727	267.694	272.521	272.554	263.338	243.15	266.015	239.801	518.835	218.39	330.108	313.438	280.401	240.198	299.634	288.755	229.112	347.349	265.81	290.889	280.886	348.539	540.492	324.301	261.186	289.657	424.553	317.848	333.451	269.419	292.893	368.394	272.351	272.615	232.856
67.315	235.234	269.361	297.525	527.444	246.389	340.366	385.875	248.082	287.576	254.559	285.531	245.974	344.924	424.518	261.335	270.841	268.023	272.121	260.299	239.687	259.303	235.723	511.082	223.466	322.97	311.551	280.925	236.91	308.169	287.254	226.865	347.413	271.917	297.659	285.624	352.006	540.016	325.343	248.185	283.149	418.508	319.212	327.862	285.994	274.618	358.797	263.658	273.67	242.861
75.663	231.723	274.864	309.935	528.468	252.256	334.924	393.233	253.425	286.784	255.791	285.575	244.127	334.543	422.817	265.96	274.782	277.583	268.58	245.628	237.865	257.996	245.711	496.942	222.968	330.148	296.248	281.036	247.884	318.654	291.992	224.545	351.743	269.688	299.949	303.198	361.132	552.569	330.404	242.509	277.225	415.214	314.6	325.588	306.416	277.76	351.848	271.272	273.467	243.409
83.999	228.915	275.903	314.537	530.912	250.689	338.775	420.322	247.062	291.104	276.718	290.488	245.203	333.803	424.171	271.259	263.965	269.452	265.3	246.283	235.761	258.202	252.072	493.181	228.977	329.173	307.806	284.949	248.691	323.255	285.777	225.164	347.184	284.688	282.87	312.932	360.285	545.336	335.01	233.857	284.59	410.962	313.781	318.01	287.641	270.306	367.753	261.7	274.007	237.761
92.318	224.381	267.677	306.204	529.955	255.139	324.836	407.471	251.067	295.032	273.008	295.419	240.374	329.994	419.887	266.327	276.773	273.391	265.381	243.683	237.417	254.039	252.242	511.857	227.633	338.893	318.454	284.731	249.283	298.509	288.554	259.545	344.422	270.243	295.411	312.936	353.827	550.109	326.448	226.325	283.61	406.604	311.249	315.981	261.509	267.391	363.384	262.729	270.115	226.568
100.365	222.665	263.479	289.448	531.098	248.414	321.962	386.321	248.16	292.231	269.416	290.481	234.376	322.771	423.421	257.523	270.722	276.789	264.211	230.42	237.744	259.119	244.565	534.611	229.196	340.333	314.708	281.77	249.021	302.632	292.388	259.395	343.56	264.041	286.12	311.41	349.792	546.9	318.29	239.025	275.244	405.997	306.787	316.827	250.964	267.641	359.668	263.205	274.084	221.462
108.401	219.698	272.722	275.5	529.035	239.552	319.372	376.783	242.172	287.549	269.481	286.446	234.13	311.962	414.028	256.754	271.546	271.403	265.919	230.157	238.566	266.367	247.799	520.373	243.574	338.474	303.711	283.894	243.601	278.05	288.594	255.075	343.147	260.902	294.209	298.612	353.18	555.662	319.384	233.196	257.323	399.07	308.93	316.445	237.232	265.931	366.948	263.111	274.018	228.72
116.472	221.39	265.381	282.129	528.658	236.013	306.348	374.496	250.783	296.251	242.184	286.469	241.496	312.766	413.994	260.325	273.663	273.532	266.926	230.278	238.565	257.592	260.304	499.913	264.937	327.459	304.042	278.955	245.251	261.042	282.627	239.118	342.414	263.979	279.085	298.386	350.723	561.538	322.569	242.794	265.27	395.362	306.41	321.903	231.995	258.436	358.591	265.894	272.493	223.175
124.839	226.259	260.419	286.007	532.896	237.141	314.397	383.066	259.325	297.662	243.154	290.788	240.642	308.994	411.392	268.07	271.892	276.934	264.45	232.655	240.858	261.088	262.212	488.605	271.218	314.346	314.522	280.936	245.178	275.333	277.588	228.711	342.386		268.467	294.148	355.624	565.767	329.775	254.242	270.362	393.053	302.395	312.869	228.663	255.853	363.183	267.613	269.452	232.734
132.888	215.276	257.186	283.824	529.073	249.208	322.121	377.367	251.564	295.87	243.667	301.656	235.863	309.962	413.54	271.668	264.754	272.756	259.099	236.748	238.539	274.493	264.945	464.158	280.063	315.591	318.433	277.132	239.526	256.801	278.51	224.456	341.67	266.886	265.342	290.163	352.383	576.073	323.359	257.322	276.183	393.237	309.632	308.398	239.95	263.586	371.642	259.458	266.94	229.883
140.914	214.417	258.04	280.91	533.665	248.749	313.435	381.414	240.061	300.922	247.89	294.053	223.618	324.086	412.729	260.242	283.485	265.749	253.073	228.41	241.382	279.804	261.498	449.908	283.779	319.534	309.074	281.295	237.623	271.874	278.981	225.858	349.405	280.046	276.022	295.528	358.021	566.696	318.447	253.98	282.323	390.956	301.937	306.945	239.895	260.532	367.33	246.211	264.778	237.174
148.931	218.64	264.169	259.53	532.629	248.925	324.981	407.297	229.419	296.357	264.538	289.766	230.084	316.052	409.046	263.241	281.154	266.231	249.257	230.899	241.132	281.896	254.153	459.203	286.691	314.689	310.851	276.908	237.28	284.806	286.361	221.747	340.011	288.611	271.673	295.78	360.507	566.758	327.13	251.464	282.841	386.277	303.579	304.318	246.287	244.817	346.79	242.791	263.184	239.071
157.248	221.064	264.725	261.187	532.773	247.246	326.178	395.822	219.527	289.629	247.897	285.034	225.839	304.949	410.473	264.895	270.075	268.48	254.711	231.442	238.81	280.496	250.192	464.131	286.004	316.749	313.353	277.828	236.289	294.216	285.167	228.155	340.375	285.051	280.839	303.714	345.112	570.204	303.409	252.278	283.328	382.356	299.42	302.222	244.667	237.137	331.561	245.172	260.281	244.732
165.327	214.634	258.684	252.283	532.888	251.306	334.396	388.737	217.194	288.335	243.558	284.348	220.929	309.353	406.448	263.112	273.541	271.462	253.05	234.547	231.453	270.664	249.729	464.944	286.433	316.735	311.523	272.701	238.137	311.641	280.374	229.833	348.019	281.063	282.791	306.666	332.38	578.12	303.544	240.571	283.909	384.286	300.29	308.258	230.459	236.565	328.181	241.521	260.853	238.493
173.499	213.772	250.103	249.187	535.262	254.525	333.053	370.658	219.149	285.043	243.429	284.484	218.915	298.346	412.879	258.022	274.667	273.262	250.596	231.253	230.44	278.461	254.077	453.78	288.873	314.6	312.921	267.359	239.35	285.639	279.371	217.216	345.074	275.711	262.079	283.964	338.273	564.833	293.469	239.438	282.374	379.122	301.673	304.609	228.502	240.94	337.417	248.052	261.758	241.252
181.924	220.604	259.58	246.674	538.521	259.844	328.084	384.251	225.563	283.54	248.269	278.364	227.18	303.733	413.429	262.289	276.475	271.66	243.588	241.029	227.619	277.261	252.41	445.674	289.534	319.684	311.733	269.209	230.474	289.566	279.142	214	338.599	278.784	255.533	276.075	342.3	574.809	290.569	244.429	282.141	376.33	299.795	304.637	258.481	243.42	341.062	260.358	261.422	245.808
190.581	229.746	255.475	235.938	537.15	266.703	324.599	369.301	228.426	286.891	256.914	280.706	224.801	304.475	411.267	264.833	268.175	271.621	245.3	227.149	226.45	274.176	247.803	448.133	288.389	318.9	313.358	269.285	233.959	278.4	276.502	210.285	341.353	279.124	258.428	266.765	349.617	586.613	300.294	254.168	275.677	373.87	297.535	305.369	246.682	239.272	326.706	261.127	262.744	252.03
198.72	235.451	259.577	231.553	539.293	271.273	321.118	363.78	227.897	284.13	251.055	282.75	224.412	322.271	411.125	270.164	259.251	265.507	246.439	233.941	226.735	286.218	253.613	442.814	285.55	303.928	303.732	265.735	229.907	310.106	278.802	210.731	339.831	280.375	254.013	268.93	342.353	593.07	294.967	260.594	276.996	368.76	307.007	310.578	243.052	238.17	325.844	253.602	263.654	248.762
206.868	222.965	252.306	237.787	535.879	261.823	314.985	375.978	228.384	286.044	248.278	281.76	222.856	332.727	410.632	258.582	264.391	262.67	248.342	245.27	224.442	286.672	254.067	450.157	279.067	326.751	302.575	268.939	233.464	307.115	280.301	205.713	340.115	274.867	265.787	261.574	353.248	593.863	292.413	262.732	268.105	366.147	298.003	304.089	247.816	237.077	315.695	260.293	258.342	244.991
214.998	223.58	254.14	245.498	540.418	280.061	313.621	371.089	232.368	288.379	250.283	278.126	222.369	322.678	415.735	254.154	254.877	260.356	239.518	251.573	225.461	293.432	246.824	449.775	272.346	327.737	309.057	268.904	239	282.864	284.061	208.079	340.011	267.651	271.335	243.451	347.745	590.043	286.159	256.795	264.611	362.435	292.271	299.706	277.931	230.886	336.718	255.088	263.027	237.78
223.083	232.276	245.58	248.877	540.534	273.969	311.226	354.813	235.296	284.019	250.438	295.157	224.61	327.592	413.06	251.239	242.953	257.538	236.226	250.755	225.255	298.426	256.125	445.987	267.612	321.085	304.259	269.075	239.238	287.898	293.141	209.885	337.427	262.572	262.112	224.836	342.469	592.665	283.919	259.067	260.163	359.849	289.347	306.188	346.761	235.427	322.581	250.455	262.981	239.258
231.224	228.953	248.13	248.841	536.872	262.916	314.956	349.015	236.126	276.778	242.392	294.079	224.538	322.719	410.954	257.828	239.9	272.189	235.728	249.303	225.583	294.725	256.891	470.53	269.143	316.56	300.68	271.928	237.882	280.56	287.109	206.142	340.176	257.749	254.116	223.554	336.758	592.67	286.162	256.23	257.367	360.461	289.565	307.046	351.056	232.798	310.115	245.682	263.541	242.21
239.424	228.709	248.302	255.86	538.439	267.186	310.74	359.025	244.495	273.703	243.541	297.54	230.651	324.883	410.822	251.571	243.519	267.731	238.986	241.237	223.316	293.662	256.482	452.806	257.357	332.36	293.935	273.452	242.83	263.978	277.65		336.156	257.613	242.458	225.596	330.821	591.393	284.853	244.909	270.404	354.401	288.274	310.51	354.493	235.617	316.683	244.959	265.206	243.476
248.817	230.21	254.419	259.838	537.684	254.926	312.568	359.529	233.261	275.398	238.898	287.45	236.574	314.103	408.579	245.759	237.548	263.32	239.579	237.858	219.576	275.258	245.437	437.488	253.743	317.553	298.541	271.968	250.78	271.159	272.952		336.865	254.68	250.762	233.061	350.009	590.888	286.661	253.265	277.78	356.68	289.517	302.452	342.825	236.933	309.097	238.148	262.967	233.979
258.173	228.837	242.248	259.179	543.605	258.548	302.138	362.388	242.21	280.09	240.181	278.417	237.418	305.765	411.806	248.361	229.702	266.879	239.232	239.214	219.921	277.17	249.128	453.402	252.511	329.166	293.762	271.427	246.792	304.058	273.566		335.608	256.782	240.972	248.331	363.901	598.127	287.136	246.61	288.013	350.805	286.916	306.574	312.47	237.115	301.476	247.89	259.929	233.343
267.217	228.612	231.498	254.749	543.103	250.238	301.349	371.542	237.903	281.526	246.152	282.679	239.304	290.101	409.413	252.496	228.589	265.551	238.209	232.968	226.743	296.337	246.118	450.887	253.158	328.621	298.871	274.524	246.642	292.9	272.423	204.588	331.08	258.014	238.773	321.712	383.963	587.228	280.212	245.525	299.618	348.078	288.739	307.868	314.649	233.325	298.657	244.874	262.64	230.295
276.072	228.303	238.475	264.146	540.627	250.598	299.994	371.631	225.351	284.385	251.976	275.226	236.576	308.937	406.049	262.163	238.406	270.257	239.734	225.051	228.55	288.655	247.773	449.807	262.329	323.022	288.613	278.109	248.17	255.791	273.645		332.992	261.724	244.521	345.043	392.439	587.796	269.59	237.679	298.932	342.709	283.749	307.947	336.066	247.103	294.785	240.203	261.062	230.74
284.941	217.778	241.517	272.29	544.448	256.767	297.402	367.454	223.219	289.365	253.545	280.412	235.606	292.461	403.263	263.645	232.23	269.99	232.486	225.667	228.587	284.146	247.786	428.046	270.422	308.85	289.703	270.073	247.623	275.176	266.27	204.505	332.003	261.753	257.399	343.192	392.117	581.79	254.545	239.079	293.958	343.76	283.831	306.751	308.628	244.135	294.962	249.519	258.161	228.247
293.704	216.063	246.675	287.495	539.584	260.667	299.07	371.044	232.053	291.56	244.083	278.389	233.275	303.452	402.134	267.035	233.68	279.003	229.884	234.503	224.048	287.378	249.969	449.819	268.422	308.547	295.257	275.449	239.857	251.311	267.484	205.177	332.39	261.764	260.155	334.025	393.893	579.174	268.869	240.768	300.04	336.522	282.551	303.316	319.046	244.168	300.796	244.533	255.871	230.078
302.342	213.25	246.383	290.244	543.636	261.146	307.291	372	234.974	300.409	242.974	288.769	227.621	304.188	406.079	267.908	231.252	264.252	234.558	235.093	221.555	288.035	245.188	453.289	275.588	303.334	294.547	277.225	247.836	249.78	260.803	217.434	335.984	259.131	269.509	336.486	395.951	583.758	271.306	247.963	288.013	330.275	278.394	300.948	295.987	241.208	306.165	238.167	257.193	233.777
310.936	216.314	243.716	287.751	543.899	262.278	282.613	379.709	238.457	296.729	241.953	292.461	224.669	311.839	402.905	263.329	230.385	259.154	234.411	249.017	225.127	281.9	247.456	449.308	277.619	299.288	296.869	272.992	247.967	228.646	263.808	231.943	339.258	254.543	255.563	313.471	398.52	574.695	272.977	244.398	281.56	329.127	279.87	301.245	304.587	248.28	318.756	234.153	248.711	232.887
319.687	212.629	243.953	284.036	541.012	266.108	290.797	376.255	233.224	307.114	238.514	283.362	232.452	303.951	406.794	264.344	228.955	255.949	229.261	248.746	228.951	282.471	240.639	428.987	278.613	304.52	299.993	270.365	249.025	250.514	268.021	248.216	333.734	254.796	254.647	288.022	396.612	580.539	273.627	247.464	273.174	324.027	278.173	309.791	287.144	249.947	316.55	233.914	248.797	233.817
328.546	214.643	236.948	279.355	540.471	254.72	298.113	379.6	237.875	296.412	236.873	294.716	239.033	302.672	401.96	262.839	235.837	259.857	228.533	245.357	225.618	285.679	239.793	438.309	272.746	292.08	299.098	268.194	239.855	285.655	264.349	257.827	331.447	247.92	257.646	293.755	403.403	571.312	281.429	236.522	263	321.808	282.996	305.977	279.965	245.206	316.355	233.958	248.559	231.95
337.43	216.679	241.049	294.665	541.13	255.434	294.659	369.705	236.221	287.252	232.559	296.349	234.074	298.548	405.403	257.264	231.482	261.159	231.829	245.549	222.942	283.073	230.827	421.603	275.477	288.682	298.166	261.493	239.464	278.399	263.373	267.666	330.868	256.884	264.612	269.614	408.316	562.783	284.212	231.273	276.711	314.309	275.416	309.443	283.855	253.641	313.199	243.146	246.583	230.032
346.191	225.02	233.24	322.406	543.181	262.366	279.13	362.712	224.637	290.336	235.374	289.345	228.497	294.144	407.624	257.663	236.843	257.089	229.041	246.038	222.771	278.195	224.547	411.214	270	318.86	300.218	260.899	239.537	272.439	263.453	262.716	330.506	265.143	258.543	304.477	417.235	569.975	284.299	232.577	264.703	312.243	280.052	309.128	282.391	270.332	306.123	240.093	244.645	227.577
354.827	222.856	222.522	327.669	543.756	258.447	267.917	351.939	227.92	287.779	233.494	285.23	230.402	292.984	409.127	250.402	231.145	254.753	229.657	232.69	223.716	273.949	216.632	419.034	272.535	285.892	297.637	263.683	238.544	251.996	263.357	248.568	327.874	263.022	264.634	289.947	412.316	575.53	286.683	234.138	263.532	309.22	279.633	299.737	273.368	257.469	302.213	243.714	246.872	227.392
363.676	227.856	228.083	319.217	543.883	260.842	269.335	370.403	226.444	283.273	233.694	281.131	228.527	301.3	416.938	251.642	230.711	248.768	230.281	234.61	223.453	275.97	218.935	423.486	261.269	282.88	296.434	262.884	241.23	263.399	267.311	248.733	337.392	250	273.779	277.456	417.867	568.648	285.869	232.801	268.157	307.871	277.086	297.168	254.212	255.286	295.14	239.751	247.056	225.773
372.934	232.062	237.586	311.961	542.421	250.363	281.866	368.801	226.078	288.018	234.959	286.43	224.801	308.753	416.806	242.252	249.232	262.84	227.437	226.333	218.318	274.392	219.97	415.604	262.287	281.484	301.455	264.73	241.439	261.173	267.727	252.507	331.986	251.04	261.498	279.359	414.021	570.405	283.461	235.625	276.495	303.881	275.636	297.982	271.425	251.816	304.431	228.384	248.738	226.64
381.896	233.604	240.364	297.172	544.648	247.948	284.589	363.742	230.702	295	236.793	291.132	222.509	312.057	414.686	241.791	241.843	259.616	234.798	219.63	228.789	269.955		425.547	265.302	284.232	298.831	262.039	240.352	276.537	268.383	250.206	332.457	250.582	269.794	278.663	413.698	570.155	280.591	232.273	279.349	299.804	274.577	291.33	252.081	249.064	309.669	232.432	241.696	229.243
390.514	228.949	238.303	301.785	545.936	244.844	272.21	365.239	230.494	288.945	232.824	295.097	223.153	327.568	418.042	240.219	228.756	261.014	234.416	222.131	227.75	262.148		427.728	256.344	302.698	294.067	262.142	244.902	316.346	271.75	251.141	330.417	249.705	268.858	279.448	424.937	566.304	278.441	236.419	282.577	293.637	271.884	289.238	253.175	242.708	313.004	244.456	243.142	227.032
399.042	225.314	236.475	301.505	541.889	247.97	266.988	354.695	231.813	286.849	231.224	306.84	216.392	329.041	424.669	252.426	232.658	254.075	235.418	228.889	231.117	256.915	221.208	440.304	263.716	290.345	293.42	258.232	232.111	297.538	270.767	247.048	332.182	252.476	277.192	272.371	422.5	559.054	285.891	235.06	268.397	295.343	275.216	292.043	253.302	243.588	307.527	253.317	245.512	227.633
407.887	223.845	237.058	297.139	545.818	245.032	284.429	351.858	229.983	279.952	230.655	305.83	216.231	324.073	426.665	249.372	225.779	255.339	240.578	214.717	231.603	256.026	220.676	417.459	264.883	300.437	297.271	261.79	228.175	301.063	273.474	240.719	332.681	245.25	272.81	288.326	426.88	563.886	281.852	232.427	262.205	289.778	273.75	287.135	240.698	239.872	319.177	248.457	244.842	228.016
416.508	218.891	245.919	300.457	542.706	243.728	278.726	352.444	231.448	275.339	232.626	311.729	215.929	324.837	431.625	243.762	225.827	251.304	242.556	239.894	236.653	247.126	222.157	418.139	263.751	295.799	290.565	262.193	225.773	299.83	271.259	235.63	331.738	244.107	285.496	283.752	424.067	560.798	281.956	232.84	251.614	289.235	269.508	286.949	256.426	237.234	321.567	248.301	248.326	226.757
425.455	221.601	248.205	290.703	546.461	244.032	273.593	359.471	227.906	266.519	235.819	312.955	213.811	340.304	437.628	246.895		256.675	244.247	243.954	244.415	240.815	221.309	414.205	267.778	291.059	290.705	263.24	229.115	300.559	272.773	244.594	333.408	249.341	274.143	277.957	433.616	564.078	283.636	233.038	272.092	286.986	269.169	291.087	274.177	237.776	307.936	247.76	249.04	225.29
433.85	222.825	244.783	290.718	547.575	228.838	275.412	376.054	223.436	264.114	236.465	317.333	219.403	332.94	437.431	252.692		247.072	246.62	234.287	248.621	232.893	222.865	400.896	271.212	298.515	287.426	263.615	233.399	303.412	271.561	240.592	334.528	253.559	269.794	264.28	431.188	567.238	287.035	232.34	258.401	286.014	269.223	288.109	263.506	245.005	304.817	250.931	248.303	225.353
442.744	219.386	251.871	283.706	551.082	228.474	277.693	355.165	221.6	268.364	231.574	313.91	217.473	334.044	446.29	250.353		236.023	236.425	234.524	244.936	228.237	226	402.469	270.915	291.345	282.314	263.185	237.451	293.663	280.695	239.673	329.242	256.034	266.033	289.009	429.486	559.157	277.685	226.312	264.901	281.01	268.352	292.833	255.846	239.816	317.529	258.892	250.457	219.732
451.659	219.471	250.593	270.521	550.667	237.809	287.45	345.021	220.748	268.055	233.977	324.909	216.747	324.763	451.557	250.472		237.808	243.443	231.298	246.333	226.35	223.681	403.342	272.331	289.365	281.019	260.755	234.403	311.066	280.888	242.216	328.147	252.299	277.978	266.158	426.564	564.094	289.306		265.558	279.401	274.027	281.283	287.328	244.259	307.709	250.819	253.349	222.386
460.311	215.272	241.443	267.243	547.635	239.573	328.069	349.016	224.825	267.74	238.914	323.957	216.993	320.964	446.516	256.934		243.3	233.164	221.262	248.693	220.909	224.097	394.667	267.315	295.313	280.53	260.04	234.758	303.513	280.892	239.386	334.157	248.393	268.008	242.812	421.784	559.282	286.949	226.178	266.954	276.986	269.341	285.144	318.684	234.062	319.198	248.953	255.472	227.64
468.715	211.441	242.186	262.348	548.278	231.966	343.722	333.123	220.204	269.852	237.126	325.444	215.221	320.412	449.117	252.663		243.794	230.185	223.476	257.374	223.331	225.326	384.363	272.539	275.029	279.772	258.622	232.143	300.098	279.51	242.579	332.245	248.984	261.134	250.5	418.646	563.49	298.935	220.971	262.686	271.271	272.757	282.94	318.318	238.101	321.601	245.731	256.367	228.23
477.269	211.248	240.868	264.407	550.117	230.839	324.922	349.951	225.595	260.473	236.408	334.415	217.773	332.453	447.543	254.626		237.544	234.259	229.74	281.632	217.152	217.612	395.135	272.741	279.556	277.278	259.758	231.939	311.843	276.21	242.078	327.034	249.228	259.146	239.449	436.041	558.231	310.981	223.95	267.535	271.946	270.542	287.362	315.653	244.203	316.207	245.06	255.635	227.103
485.808	217.485	233.601	259.09	553.11	242.006	328.07	335.078	225.968	266.093	236.099	320.804	219.903	315.807	452.033	243.493		242.084	237.909	225.56	292.046	226.375	215.931	404.566	272.626	278.594	270.196	256.577	237.5	307.853	276.197	246.382	332.984	242.939	253.948	233.714	431.224	545.506	315.806	231.193	275.731	266.771	270.708	292.591	330.456	240.618	320.784	245.616	254.091	224.21
494.322	213.564	234.502	256.683	553.769	242.863	320.845	347.43	220.872	276.693	228.478	324.488	219.857	307.793	452.864	245.515		239.931	231.078	225.135	293.558	226.253	216.137	414.064	265.696	294.593	274.267	255.764	244.735	319.926	276.894	253.904	333.166	238.67	244.595	229.043	420.339	541.536	321.181	230.05	284.027	264.149	271.736	290.441	329.12	242.105	325.569	242.133	251.055	224.549
502.93	215.142	233.402	252.201	554.491	236.461	307.28	348.619	224.087	276.869	227.097	328.155	220.47	302.307	450.406	244.768		243.316	227.155	232.114	293.747	243.244		426.458	261.629	284.34	275.903	256.507	244.511	313.407	279.112	251.305	331.082	243.755	253.407	248.025	410.306	554.957	328.649	231.55	260.32	260.724	268.724	291.714	357.889	240.188	327.292	243.558	253.202	223.263
511.873	223.672	232.026	250.769	555.283	233.612	309.098	347.488	221.326	279.942	224.317	321.617	217.921	300.326	447.745	240.43		245.538	237.42	232.247	297.297	234.005		410.968	248.728	281.803	274.52	259.088	234.419	302.158	278.779	252.554	341.54	239.483	255.803	255.967	399.981	567.635	335.351	229.507	255.913	259.475	271.039	293.223	318.838	234.147	319.025	251.627	256.08	228.39
520.814	226.056	229.968	245.2	556.25	237.31	301.247	352.653	222.623	278.031	228.369	324.146	210.623	293.397	446.551	239.388		245.624	242.555	223.601	304.539	231.494	215.689	411.113	254.568	294.306	267.224	257.524	228.653	299.397	272.052	260.085	339.079	242.033	257.142	256.091	404.453	543.879	329.979	234.538	272.125	256.008	274.714	289.675	311.251	230.838	315.129	251.486	250.991	223.79
529.366	224.309	232.503	248.448	558.203	239.232	314.017	371.362	226.497	281.608	224.276	333.172	211.664	289.029	452.123	242.237		237.883	238.188	230.755	315.522	240.34	218.451	412.072	250.986	292.747	272.332	254.844	227.516	277.303	275.861	257.339	343.325	239.292	249.838	234.975	405.077	530.044	328.663	228.586	274.726	254.629	273.654	289.17	328.972	225.922	309.165	251.231	252.712	222.355
537.735	217.587	230.75	238.638	557.709	237.675	310.258	341.118	221.529	273.941	222.926	340.957	213.857	277.468	447.556	243.734		235.885	243	231.455	316.505	241.495	215.703	398.583	252.712	293.276	282.463	256.54	226.596	269.765	273.12	251.797	341.605	230.948	247.273	243.38	386.169	521.378	325.066	227.671	273.85	251.239	270.415	286.646	323.338	225.877	318.216	237.782	255.379	229.905
546.597	215.297	224.303	241.116	561.045	234.046	301.959	344.425	220.476	269.696	225.036	335.86	212.763	283.542	448.776	249.286		230.567	237.674	230.912	324.143	250.81	221.62	379.16	253.404	291.898	276.634	252.648	225.322	275.926	271.596	245.34	336.631	226.747	246.355	286.634	378.706	513.861	313.34	233.309	283.884	250.455	271.427	285.627	339.746	229.098	317.083	238.287	252.355	226.215
555.096	216.311	226.369	242.915	559.31	241.319	296.518	338.616	225.865	272.825	230.988	334.218	219.416	288.885	451.341	243.313		232.109	238.154	228.55	326.766	261.461		385.7	251.475	297.669	289.349	256.447	230.136	288.227	269.165	234.43	332.917	229.044	243.033	311.777	379.286	510.36	309.487	225.493	280.83	243.819	271.064	284.264	308.086	232.494	306.038	238.82	255.545	220.049
563.514	212.132	219.309	238.659	562.247	245.832	291.776	329.954	229.323	273.171	231.766	339.343	211.129	296.829	451.888	245.818		232.538	242.13	231.16	330.737	263.121		376.901	250.687	283.111	290.682	257.081	236.625	302.166	270.675	234.226	332.407	230.185	240.605	293.174	372.273	500.642	301.931	230.176	275.43	244.463	268.728	284.784	289.054	228.519	301.686	238.067	254.387	227.659
571.922	205.391	219.504	237.621	567.789	244.868	288.964	336.351	231.5	266.634	231.116	343.195	212.61	303.502	445.822	247.878		225.487	241.966	228.505	328.724	263.276		374.547	254.183	307.604	298.427	257.036	233.397	290.808	269.809	235.787	334.79	230.588	247.542	285.363	367.812	501.615	306.766	230.209	261.99	243.4	270.062	287.546	277.341	228.859	314.392	234.888	253.525	231.654
580.829	206.432	224.036	237.231	560.037	246.692	297.502	346.003	236.424	261.672	230.237	339.908	206.093	303.363	447.856	246.917		222.972	247.29	230.743	331.414	265.088		379.291	251.983	302.93	285.533	257.108	234.877	298.301	268.169	223.976	333.902	224.565	251.73	299.29	362.814	497.049	304.307	226.492	247.87	242.097	266.749	284.129	265.677	234.347	309.17	237.571	257.228	222.623
589.592		225.749	235.65	564.998	247.527	299.171	331.479	235.097	265.021	225.819	330.425		293.879	452.477	245.627		221.873	250.105	229.87	328.733	250.418		383.483	256.296	285.323	295.496	258.524	239.406	272.418	271.755	230.104	328.875	227.333	249.613	302.034	360.683	489.681	303.315	225.27	244.325	239.38	271.773	288.21	268.245	224.872	305.795	238.813	257.105	219.327
598.528	209.717	224.959	244.472	564.716	248.394	295.477	360.332	238.063	264.748	225.307	319.775	206.614	295.584	451.449	240.458		221.547	246.945	229.581	329.262	246.991		381.124	262.656	284.522	298.259	254.203	234.535	276.768	264.105	220.895	333.85	230.655	247.151	303.43	360.405	489.892	301.167		252.718	239.566	272.638	285.34	266.605	226.188	313.957	243.026	259.098	216.22
606.95		223.006	261.764	564.667	242.273	287.819	358.673	248.115	269.689	225.187	320.417	208.453	284.305	448.878	245.127		220.687	249.409	230.905	333.924	248.33		364.838	257.792	282.891	306.656	260.692	236.382	252.418	263.353	213.626	332.693	232.048	245.779	284.113	358.489	486.097	295.062	219.869	252.181	233.871	269.194	284.28	266.055	225.169	311.203	241.69	255.072	215.209
615.461	206.707	224.994	282.931	565.899	243.379	286.739	351.081	240.483	271.806	229.165	318.953	208.876	289.762	455.954	239.527		226.065	247.22	232.546	326.406	262.479		358.862	261.319	295.09	302.257	259.498	238.894	286.155	265.197	210.231	332.367	228.377	249.348	274.191	356.355	485.01	289.295	222.537	256.068	236.315	267.348	279.174	264.426	225.309	319.339	230.361	255.82	215.935
[truncated: 206 more columns]
