# Supplementary material for: Sustained store-operated calcium entry utilizing activated chromatin state leads to instability in iTregs
Source: eLife journal article supplement (doi:10.7554/elife.88874), 2023-07-04
Supplement: fig2-data2 [file 50min tTreg.xls]

## Sheet: Intensity Mean
Intensity Mean
Time [s]	Intensity Mean::1000040655	Intensity Mean::1000040656	Intensity Mean::1000040657	Intensity Mean::1000040658	Intensity Mean::1000040659	Intensity Mean::1000040660	Intensity Mean::1000040661	Intensity Mean::1000040662	Intensity Mean::1000040663	Intensity Mean::1000040664	Intensity Mean::1000040665	Intensity Mean::1000040666	Intensity Mean::1000040667	Intensity Mean::1000040668	Intensity Mean::1000040669	Intensity Mean::1000040670	Intensity Mean::1000040671	Intensity Mean::1000040672	Intensity Mean::1000040673	Intensity Mean::1000040674	Intensity Mean::1000040675	Intensity Mean::1000040676	Intensity Mean::1000040677	Intensity Mean::1000040678	Intensity Mean::1000040679	Intensity Mean::1000040680	Intensity Mean::1000040681	Intensity Mean::1000040682	Intensity Mean::1000040683	Intensity Mean::1000040684	Intensity Mean::1000040685	Intensity Mean::1000040686	Intensity Mean::1000040687	Intensity Mean::1000040688	Intensity Mean::1000040689	Intensity Mean::1000040690	Intensity Mean::1000040691	Intensity Mean::1000040692	Intensity Mean::1000040693	Intensity Mean::1000040694	Intensity Mean::1000040695	Intensity Mean::1000040696	Intensity Mean::1000040697	Intensity Mean::1000040698	Intensity Mean::1000040699	Intensity Mean::1000040700	Intensity Mean::1000040701	Intensity Mean::1000040702	Intensity Mean::1000040703
0	346.866	356.486	295.788	387.532	318.011	288.286	229.151	304.025	261.278	374.06	219.039	302.396	328.291	369.12	294.367	297.323	373.221	264.584	297.87	309.604	358.189	342.098	271.118	317.253	294.636	305.276	449.274	226.033	292.178	280.524	366.129	385.893	325.171	369.325	336.683	333.934	296.116	266.659	357.976	352.011	240.797	403.577	263.244	317.457	236.873	260.508	338.936	334.076	268.407
8.958	346.85	353.932	295	379.374	314.08	295.523	226.12	303.492	262.042	375.593	217.462	304.793	323.957	350.703	293.038	295.24	368.133	265.321	293.212	307.915	356.886	339.667	269.358	320.371	292.314	304.342	451.453	226.979	292.147	278.949	368.519	389.182	328.12	369.235	335.741	335.017	294.983	265.249	359.307	348.462	241.29	402.574	262.205	316.976	238.026	257.757	341.586	331.734	265.384
17.588	342.132	351.997	296.958	375.197	303.626	295.754	228.779	305.354	262.812	375.101	221.276	300.314	323.41	344.675	291.613	295.474	374.439	262.247	286.695	304.847	350.079	341.231	267.779	319.381	291.077	300.968	454.271	223.665	291.309	279.084	366.726	387.452	327.492	367.631	335.761	333.497	295.167	262.252	359.19	348.824	238.808	397.686	263.104	316.495	235.954	259.009	341.433	333	265.072
26.642	340.693	354.868	291.859	370.217	306.038	295.407	228.739	304.672	262.304	372.469	216.892	306.631	324.321	345.183	290.173	295.277	370.368	260.945	283.619	303.56	349.496	337.67	265.658	317.171	289.688	299.569	456.927	223.906	289.235	281.555	362.364	383.803	330.263	368.88	334.745	332.342	296.073	265.257	357.96	346.478	239.321	396.807	262.978	318.526	235.054	256.091	336.643	332.438	264.806
34.902	343.288	350.479	292.888	364.653	301.509	292.291	230.603	304.907	263.322	373.207	216.522	301.465	319.059	345.555	289.778	296.926	372.148	263.232	279.455	308.086	351.269	338.263	266.316	314.86	288.838	301.185	452.882	228.125	286.654	278.113	362.22	382.88	331.797	364.966	335.401	333.672	295.861	264.81	356.889	347.706	239.13	399.327	262.719	317.243	232.91	257.789	334.704	332.042	264.275
43.005	344.676	351.018	291.761	360.108	299.155	297.14	234.017	307.249	261.569	375.619	215.872	301.248	320.105	345.387	291.174	296.993	370.043	264.295	277.241	306.508	349.442	340.351	269.397	314.231	287.554	299.416	452.346	229.111	286.608	279.366	363.579	383.844	329.656	364.135	333.794	334.027	293.565	266.345	356.65	344.437	239.279	399.304	261.806	316.581	234.776	256.96	333.835	328.38	263.086
50.986	339.23	350.75	294.61	357.014	292.76	290.947	234.78	307.611	261.85	372.128	214.644	306.495	321.105	344.441	291.745	296.625	367.866	261.356	274.355	304.611	349.802	336.042	265.62	312.682	290.312	299.636	449.472	226.134	286.619	280.903	361.637	383.941	330.871	366.814	335.507	329.646	289.526	265.55	357.351	345	238.315	395.921	262.035	313.811	229.313	257.489	336.195	329.956	265.033
59.028	347.572	348.88	291.663	352.625	293.212	290.818	237.109	309.398	260.81	369.845	214.179	301.735	320.838	345.735	286.73	294.493	362.18	261.255	273.12	305.195	349.585	334.774	265.047	310.953	287.617	297.334	452.889	227.147	287.504	278.686	356.651	381.367	332.179	364.245	334.035	328.98	289.364	263.155	355.305	345.934	240.902	392.659	263.618	313.593	232.95	255.194	334.531	329.994	266.45
67.325	345.385	350.933	293.058	356.792	296.433	292.213	233.332	311.151	260.226	370.955	214.174	299.26	316.094	351.083	292.754	293.02	370.53	259.189	273.923	305.814	347.546	332.805	264.492	306.147	288.377	296.716	449.797	226.055	285.642	279.12	360.4	379.839	332.222	363.343	334.791	332.724	290.077	261.767	356.295	344.924	237.8	393.401	261.272	313.049	231.568	254.064	333.496	329.069	263.759
75.689	343.681	352.417	290.773	353.837	295.835	292.976	236.621	311.949	262.262	371.139	214.209	303.99	317.522	349.389	291.433	290.37	368.359	261.161	274.127	304.248	344.761	332.168	265.239	303.709	285.306	298.531	449.228	227.545	285.481	278.17	357.138	380.678	330.677	363.488	330.883	329.783	289.408	262.012	356.284	345.222	241.228	393.004	263.814	311.923	232.239	255.165	332.877	328.751	263.399
83.998	342.208	345.488	289.987	352.805	294.779	291.036	238.772	314.465	261.161	371.19	215.842	301.236	316.917	349.817	290.54	288.689	370.564	261.277	273.095	305.117	345.555	330.516	263.284	303.481	286.748	297.484	450.602	226.937	283.713	279.163	353.865	378.618	332.138	359.848	331.729	331.529	288.526	262.953	354.232	341.845	243.257	394.672	263.112	313.675	233.47	253.446	331.965	330.027	262.28
92.344	340.669	339.619	292.843	353.713	295.802	289.589	239.964	314.37	265.338	370.238	213.638	302.123	316.553	348.705	289.268	290.118	369.116	261.79	275.389	304.412	346.163	332.386	267.594	304.575	285.491	299.622	450.358	226.336	281.544	276.247	356.515	375.984	331.286	362.458	332.166	330.831	285.447	261.65	356.186	344.453	240.689	395.252	264.601	312.156	231.148	251.963	332.308	327.858	266.319
100.385	338.781	336.687	290.739	351.379	297.303	290.154	242.733	316.672	261.876	371.839	213.191	303.224	316.118	353.624	288.958	291.633	371.258	260.794	276.059	306.022	342.866	331.963	264.83	310.957	285.107	296.868	453.386	227.492	282.086	276.796	355.125	380.239	329.935	362.341	332.5	332.9	287.665	261.161	356.066	347.202	241.556	395.015	261.656	314.138	231.876	254.332	331.927	329.574	262.258
108.399	339.794	337.712	292.153	346.951	293.896	286.068	244.484	317.221	262.65	368.554	213.523	301.607	317.25	349.674	287.862	289.089	366.138	261.852	276.098	308.488	344.277	330.751	265.414	310.077	285.65	296.813	451.506	226.856	282.088	278.545	354.599	379.583	331.246	357.305	329.165	325.354	285.815	261.309	358.493	347.186	237.98	391.425	262.784	312.392	228.29	253.846	332.777	325.789	263.363
116.484	340.739	339.741	288.97	348.138	292.664	285.739	243.771	314.87	262.737	368.421	215.16	301.128	314.038	350.899	288.565	289.639	366.653	263.128	276.057	310.392	344.58	329.753	264.243	313.719	285.435	295.766	451.463	226.328	280.445	279.819	356.881	376.732	334.111	356.992	329.932	328.37	284.861	262.594	356.367	347.104	236.823	392.064	261.226	312.648	229.94	251.807	329.247	325.12	261.203
124.831	341.1	335.831	292.892	349.138	290.796	287.014	244.565	314.816	264.739	368.312	214.994	298.812	315.72	351.112	289.155	287.362	367.673	257.829	277.529	310.318	342.248	328.674	265.223	313.456	286.5	293.422	453.857	226.414	282.49	279.816	355.037	380.692	331.974	356.397	330.3	330.623	281.538	263.131	358.165	341.391	237.513	389.343	264.639	309.403	227.444	255.235	330.303	327.985	260.63
132.907	340.581	334.385	290.909	348.917	294.976	289.486	245.576	315.489	268.152	367.357	217.488	302.825	315.752	356.035	289.955	287.34	370.954	260.189	278.584	314.143	343.803	332.123	263.842	311.73	282.239	296.099	451.587	229.03	279.057	275.456	350.907	375.444	333.688	355.743	330.591	328.926	286.018	260.586	354.945	340.547	234.5	387.311	263.01	309.393	229.837	256.64	329.028	326.024	263.171
140.921	339.192	335.395	291.043	346.654	297.787	286.29	246.355	315.716	271.55	367.575	218.657	299.542	313.675	353.491	291.703	285.791	365.691	261.115	282.131	311.203	341.257	329.9	264.42	314.589	281.326	294.216	450.402	226.758	279.061	276.162	353.92	376.38	333.861	356.07	328.589	330.675	282.162	259.528	353.479	342.644	234.831	389.793	266.246	311.929	229.212	253.096	330.139	329.697	263.581
148.925	339.797	334.343	290.143	351.061	297.12	290.502	247.675	315.347	271.723	367.102	222.165	301.716	311.956	354.758	289.438	288.138	368.043	258.657	286.488	312.184	342.684	331.668	265.535	316.614	281.577	297.211	454.322	228.289	280.387	279.686	353.588	377.116	331.807	356.362	330.458	327.99	286.431	264.451	353.267	339.924	237.549	388.102	260.73	307.781	228.34	253.286	330.117	324.705	263.048
157.258	337.468	331.154	292.462	347.89	302.231	286.718	248.422	312.633	270.024	370.943	218.445	301.914	315.057	355.053	289.688	286.865	370.482	258.919	296.776	312.079	339.357	329.815	265.91	313.778	281.854	294.357	455.729	223.69	281.461	276.26	352.373	373.108	335.786	357.265	328.572	324.332	286.109	262.518	354.371	342.346	236.506	387.499	260.616	310.094	231.913	250.893	328.309	325.112	262.091
165.33	336.426	336.33	286.921	348.283	298.506	286.856	248.213	311.586	269.45	364.236	220.705	301.349	317.132	351.834	288.096	286.503	368.482	260.59	307.471	311.065	343.9	325.946	263.862	315.072	282.36	293.149	454.835	224.103	276.676	277.921	353.385	375.039	335.351	354.85	325.588	329.453	284.781	260.088	350.919	341.194	238.391	387.249	263.43	306.745	232.493	251.612	326.965	325.19	263.566
173.51	335.358	336.28	289.984	351.124	296.395	288.556	250.181	309.283	267.317	367.967	218.147	300.118	315.666	351.108	288.055	286.93	371.969	258.58	319.072	312.597	339.854	328.23	266.554	316.345	280.532	289.708	455.443	226.113	276.006	274.496	353.984	373.662	332.637	352.256	328.273	323.338	285.789	258.347	349.119	343.971	237.308	386.478	263.036	312.315	234.843	252.868	326.153	328.091	263.889
182.225	333.163	331.89	291.078	345.27	297.497	284.661	247.636	311.851	267.286	370.153	217.963	298.585	316.5	350.709	289.07	286.561	370.773	258.671	329.353	312.088	339.902	327.917	263.913	314.498	279.385	292.895	454.188	228.792	279.373	274.813	352.141	375.389	333.279	353.237	325.752	322.03	285.272	259.909	349.628	343.842	239.44	385.821	263.433	308.807	233.476	252.927	327.959	326.657	266.161
190.595	333.018	333.945	289.885	346.733	295.695	285.2	252.638	312.428	265.048	369.242	219.533	299.226	316.468	354.159	289.39	286.629	371.622	258.935	338.493	309.706	339.402	328.489	264.431	312.311	281.855	291.334	451.301	229.601	274.674	277.598	352.477	373.35	333.797	351.723	327.364	324.874	282.613	258.418	348.133	343.525	237.2	383.979	265.162	309.437	232.803	253.279	328.446	327.861	260.977
198.712	335.063	336.949	291.929	346.82	293.765	288.801	251.981	310.9	264.686	365.477	211.268	300.974	313.442	354.111	287.217	285.341	371.551	259.309	350.428	308.833	339.241	324.81	262.597	307.009	279.811	293.871	453.219	223.072	278.187	277.302	350.489	377.436	330.52	353.626	328.298	322.071	284.022	257.523	348.846	343.829	236.046	383.808	262.374	309.609	230.237	253.536	327.672	327.662	261.694
206.878	331.718	337.135	290.343	347.029	297.509	287.035	252.815	311.453	262.551	369.98	214.816	301.48	315.74	358.109	289.467	287.821	372.328	261.705	386.609	310.817	337.436	327.299	263.442	309.413	277.226	291.397	458.404	226.266	275.827	276.12	350.685	375.994	332.545	351.129	325.967	324.192	279.32	256.566	347.157	347.442	236.352	385.745	260.23	309.785	231.569	251.795	327.138	323.823	260.117
214.99	332.326	337.358	289.047	353.637	296.259	289.957	253.982	309.114	269.378	366.448	210.806	301.939	314.597	358.132	289.148	285.131	369.352	259.806	434.605	310.013	334.737	328.035	264.534	303.293	281.633	295.392	453.74	221.605	272.707	277.179	347.539	372.54	332.8	350.533	327.772	322.931	283.716	257.196	344.554	345.35	237.904	386.655	261.04	306.107	233.59	254.275	328.246	322.979	262.949
223.082	333.119	336.93	288.527	347.56	296.936	285.482	254.567	307.443	270.113	368.489	211.903	301.285	315.204	357.582	291.029	285.471	367.594	264.563	440.089	311.085	335.975	326.617	262.238	306.571	280.009	294.551	452.933	226.707	275.875	277.747	349.024	374.852	333.797	352.276	324.783	323.147	281.702	258.702	344.248	344.854	236.427	384.588	262.325	311.149	230.177	252.972	326.604	326.689	263.045
231.246	333.692	334.207	288.614	347.134	297.796	286.31	253.668	305.628	269.414	362.565	210.648	303.332	318.517	354.821	287.436	285.85	367.873	261	431.579	308.92	334.177	325.37	262.922	301.703	281.041	295.897	459.455	226.017	275.878	276.589	350.037	373.029	331.202	350.218	324.721	321.217	282.554	258.458	341.286	345.091	237.331	384.191	262.565	309.94	233.039	254.972	324.348	326.455	262.22
239.434	333.629	333.552	289.638	349.785	297.402	284.841	255.115	302.13	266.226	364.102	214.4	297.667	314.635	353.06	288.981	285.159	368.419	260.05	420.734	305.866	333.754	323.941	263.752	303.754	275.152	294.23	456.072	225.397	273.885	275.44	351.403	376.589	331.22	347.486	325.926	322.606	283.047	256.123	341.832	348.92	237.368	383.394	260.714	307.792	231.916	250.45	324.583	324.517	261.629
248.817	331.429	329.902	291.103	346.667	296.719	289.704	253.817	304.4	268.348	363.161	210.769	303.479	317.176	355.613	286.489	288.333	373.799	260.556	417.368	308.262	332.003	326.46	262.286	301.883	281.337	296.292	453.94	224.084	273.092	276.072	346.535	371.239	330.516	347.318	324.135	320.917	280.691	257.24	338.805	346.982	238.272	383.339	262.767	307.652	233.336	248.465	323.198	324.417	261.892
258.186	333.753	327.771	291.557	347.814	293.078	288.771	255.324	305.928	264.714	364.827	213.155	298.82	316.832	354.528	288.551	286.993	371.135	260.074	408.223	303.904	332.821	324.244	261.324	301.174	276.128	291.688	450.847	224.83	274.837	276.598	347.566	375.255	328.382	346.207	327.562	323.096	279.366	255.492	338.305	348.929	237.426	381.343	261.255	309.809	229.62	254.54	326.266	321.671	260.917
267.223	332.955	324.299	287.702	348.592	295.464	285.665	255.301	302.379	267.877	364.026	214.078	301.751	317.189	352.582	288.256	287.304	375.597	257.913	402.68	302.271	332.626	323.82	262.99	298.416	276.109	290.867	457.507	223.701	275.358	277.312	347.168	372.692	329.928	345	328.644	321.817	283.815	259.707	335.014	347.417	238.136	382.84	261.06	308.726	230.403	251.6	323.109	321.948	263.23
276.079	334.132	325.411	287.31	348.626	302.423	283.889	255.875	297.855	267.234	363.145	213.189	300.127	320.328	352.432	290.419	286.253	372.386	256.805	400.605	304.588	332.742	326.199	262.03	298.071	277.796	291.18	455.194	221.068	272.774	278.683	349.392	372.581	325.777	346.379	325.765	322.216	282.935	257.038	334.319	346.989	236.734	381.223	261.328	307.672	227.527	254.624	325.069	322.882	262.965
284.938	332.333	325.176	287.457	349.582	300.075	288.884	257.483	298.465	267.636	367.519	216.09	299.291	317.207	356.386	289.555	287.446	368.206	262.004	395.639	301.759	331.896	327.24	261.8	294.282	276.104	294.483	454.484	223.664	271.012	279.386	348.883	372.937	326.64	345.718	325.961	321.803	280.996	257.753	334.251	346.504	235.399	377.068	264.016	307.85	229.337	253.486	323.935	323.596	263.723
293.697	335.727	320.658	288.824	349.805	301.734	284.45	255.926	294.98	265.162	366.796	213.883	298.078	317.711	355.571	289.704	286.676	368.182	259.563	396.873	301.55	332.012	323.485	259.65	296.197	273.244	297.446	452.356	222.823	272.386	278.53	347.52	374.25	325.679	343.615	323.193	322.91	283.018	256.169	332.975	346.94	234.518	375.857	263.35	307.397	229.368	250.837	322.944	325.389	263.925
302.344	330.069	324.471	284.011	344.694	300.454	285.178	256.214	296.09	263.652	366.084	217.386	298.477	318.465	355.391	291.165	283.64	368.629	257.582	404.304	305.033	330.774	324.286	262.97	294.381	276.274	293.76	457.053	223.56	272.917	276.379	346.808	375.66	326.584	342.806	324.308	321.455	284.953	255.88	332.936	343.54	235.676	377.623	261.338	308.538	228.894	251.056	323.86	323.889	259.201
310.932	333.231	321.101	288.482	348.039	295.095	287.434	256.22	292.706	264.636	367.748	219.58	300.157	315.339	353.561	286.215	282.451	372.313	256.088	409.709	298.883	331.47	326.085	258.01	295.077	276.528	290.882	454.695	222.735	271.494	276.396	349.79	372.09	328.308	343.663	323.357	320.649	280.956	257.012	335.783	344.185	237.228	379.518	263.749	306.816	227.789	249.453	325.429	321.475	259.684
319.74	334.016	322.364	287.992	345.344	294.347	285.207	255.739	288.57	264.104	365.442	216.342	296.459	314.525	355.078	289.051	284.172	375.088	254.085	416.696	300.197	329.802	325.41	259.953	295.533	275.403	290.619	456.25	223.363	269.792	275.709	347.353	371.798	328.198	342.878	325.935	317.149	281.022	256.5	335.812	342.51	235.805	378.026	259.469	307.713	229.888	247.717	320.829	323.439	260.122
328.54	332.788	319.36	289.518	344.625	293.028	286.293	253.99	287.119	264.048	366.288	215.79	298.077	315.692	354.53	292.025	284.164	373.319	259.24	419.217	300.83	331.685	321.669	260.147	296.764	272.436	295.352	452.65	223.249	269.319	275.241	348.211	373.845	328.631	338.954	322.88	318.93	280.475	258.45	332.673	335.954	236.505	376.582	260.769	308.764	228.536	253.693	323.088	323.637	261.684
337.552	330.275	321.581	286.679	341.914	290.776	285.287	255.712	286.502	268.192	362.474	217.554	299.005	320.271	354.219	289.514	282.679	371.195	257.405	422.246	299.513	329.826	326.088	263.185	293.839	273.426	292.108	456.959	222.339	270.103	277.239	346.347	369.735	326.59	340.396	322.767	321.301	280.17	260.359	333.249	337.85	236.509	376.47	260.299	304.184	228.844	251.484	321.54	320.307	262.488
346.213	331.358	317.942	285.061	346.995	290.777	283.807	255.045	286.172	267.283	361.357	219.289	297.81	317.628	351.028	291.127	283.231	373.704	256.466	426.789	299.389	330.976	322.274	261.003	291.365	271.767	292.147	450.189	224.189	270.933	275.953	343.722	368.727	326.48	339.613	323.701	319.491	279.066	255.295	332.519	335.789	235.632	379.623	259.918	307.83	228.405	247.93	320.127	322.414	260.534
354.82	329.578	319.748	288.407	344.138	292.487	285.294	258.208	281.239	265.46	363.057	216.024	301.245	318.879	351.602	290.716	285.819	376.256	254.937	426.282	299.65	327.512	321.324	265.188	292.713	272.613	293.771	452.536	224.196	271.052	277.442	348.553	368.564	323.274	338.534	322.251	317.091	277.131	257.915	332.824	332.54	237.33	380.402	258.395	310.056	227.772	251.083	316.565	321.003	261.891
364.052	331.242	319.224	287.209	341.781	290.462	283.633	255.828	283.335	267.474	365.627	221.266	301.11	317.646	353.184	291.022	284.185	374.406	256.308	431.703	299.507	328.682	324.629	261.343	293.154	273.219	290.429	455.792	223.271	270.327	277.186	346.255	366.753	324.809	340.729	317.582	318.074	278.196	253.943	332.185	332.427	238.74	376.765	259.406	307.752	231.281	252.814	319.908	324.081	261.66
372.965	331.925	316.571	285.362	343.055	291.131	284.437	257.52	281.187	266.607	362.04	218.977	300.155	319.984	357.181	290.479	285.297	374.569	258.604	435.871	301.603	329.1	326.299	261.93	292.294	273.278	295.688	454.833	223.936	269.83	276.083	347.563	367.81	324.91	339.363	321.98	317.155	281.657	259.045	330.742	331.991	235.266	373.525	257.062	306.796	230.579	247.712	318.401	326.29	261.166
381.907	329.165	312.801	285.068	348.634	291.836	283.533	259.194	279.362	268.278	360.211	218.994	301.207	320.062	359.891	287.863	284.352	374.826	255.016	436.888	304.392	328.661	320.154	260.724	293.127	272.778	293.933	452.233	223.022	270.534	275.031	343.861	368.392	323.124	338.903	326.958	318.226	280.088	257.016	331.321	328.03	233.014	374.498	257.97	302.771	230.377	250.925	318.013	321	259.694
390.516	333.569	310.969	289.472	340.671	292.915	286.607	258.427	276.657	264.527	361.82	220.552	299.985	319.571	357.079	288.961	284.237	375.195	255.06	439.454	302.72	326.056	320.025	263.181	289.5	272.814	296.296	454.106	224.526	270.888	278.495	346.986	364.721	329.364	336.46	320.62	317.164	278.019	260.852	332.365	330	235.488	371.778	260.061	306.579	229.926	249.431	318.272	321.265	259.514
399.044	333.819	313.084	287.748	343.692	290.283	287.196	259.851	275.158	263.699	362.353	219.929	303.305	316.954	358.184	290.465	285.131	371.183	256.727	442.579	305.052	327.703	323.613	262.891	291.69	272.544	294.151	453.375	225.286	266.106	275.898	348.55	370.06	332.631	339.594	320.777	316.194	280.986	257.753	332.214	327.988	235.977	373.235	259.319	303.741	229.819	250.024	320.512	321.839	260.951
407.888	334.042	313.77	284.895	343.625	291.369	283.585	259.362	274.994	264.825	362.341	221.154	300.542	316.943	359.36	291.821	288.454	374.868	256.442	440.503	304.1	324.25	318.823	261.073	292.918	273.949	294.201	449.3	226.417	269.28	276.877	347.13	368.306	334.85	338.188	322.764	314.919	279.036	255.682	330.267	325.142	237.444	370.089	259.024	302.984	226.592	250	319.817	321.727	263.585
416.518	332.46	310.01	287.019	346.079	289.753	287.879	261.806	274.664	266.274	360.655	218.071	299.955	319.008	359.208	290.788	282.625	370.172	254.3	442.687	299.605	325.519	321.282	262.688	289.526	273.073	292.745	453.541	224.004	268.038	279.723	346.344	367.435	335.137	335.58	324.092	315.107	283.858	259.613	331.461	331.443	234.555	374.511	259.84	303.684	227.138	248.962	316.96	319.966	264.882
425.444	332.871	313.959	286.46	343.513	290.574	285.656	260.94	272.298	264.547	362.873	215.611	299.357	319.326	361.308	293.942	283.34	373.338	256.114	442.361	302.619	327.331	323.684	264.875	292.212	272.881	294.221	456.241	223.727	268.152	278.454	347.38	366.412	329.044	337.655	322.524	314.826	282.142	258.731	334.419	333.268	235.023	369.119	258.094	303.554	225.457	251.145	318.225	320.88	262.865
433.869	327.839	311.14	290.335	345.605	287.527	284.694	261.442	270.915	263.71	363.52	221.732	303.335	317.225	357.64	291.54	283.818	374.111	256.352	445.044	304.492	324.375	320.661	263.495	290.326	271.193	292.482	458.372	225.025	266.963	278.94	345.26	365.878	326.974	338.196	321.606	316.18	279.721	257.913	331.786	332.561	236.708	372.877	260.603	304.991	229.153	250.865	319.399	325.097	261.71
442.748	332.201	312.853	286.395	344.692	287.686	284.134	260.335	268.296	263.754	360.633	216.383	301.383	316.722	362.648	289.678	284.285	375.841	258.34	452.537	301.097	324.386	322.639	262.661	290.184	271.45	295.184	454.405	222.678	266.675	276.006	344.569	368.581	328.468	336.542	324.227	317.822	281.074	254.362	329.108	333.141	237.282	372.769	260.62	307.717	226.581	249.539	316.963	321.392	264.758
451.654	331.501	309.403	288.342	345.363	284.283	285.838	262.258	268.761	260.531	359.592	221.236	300.551	313.665	356.209	289.912	284.078	372.314	254.901	454.485	296.907	323.201	321.186	262.657	286.825	272.214	293.982	453.368	222.631	270.213	276.585	348.265	366.05	327.216	335.343	323.117	315.487	279.257	257.786	331.57	335.353	234.977	371.244	258.028	301.521	227.753	249.544	318.331	322.731	265.597
460.319	334.743	307.484	288.671	344.012	287.77	286.36	264.723	270.933	258.725	361.239	216.261	300.615	319.995	360.121	292.737	283.497	374.389	256.716	452.49	299.099	324.243	321.656	259.444	288.284	272.126	294.363	455.366	224.423	265.337	276.233	342.821	365.742	324.1	334.279	323.064	314.861	281.32	258.959	331.469	339.136	236.352	372.367	257.793	302.962	226.333	248.225	317.607	319.312	262.916
468.714	331.112	308.42	288.728	342.943	291.661	282.026	264.108	270.524	262.509	359.742	220.916	302.645	314.662	357.377	293.312	283.28	378.282	256.931	452.353	299.605	324.151	319.238	260.271	287.947	270.784	293.451	453.964	222.228	268.01	276.893	345.058	368.612	324.822	334.086	321.202	316.714	280.535	257.521	329.877	339.736	237.5	367.795	257.808	302.494	224.453	249.103	314.825	320.782	261.961
477.258	332.163	303.832	290.563	342.865	291.96	285.011	265.279	273.468	263.681	358.349	219.138	299.632	318.242	359.639	291.722	285.017	380.754	254.241	454.856	299.666	324.118	318.634	261.534	288.698	272.85	292.203	458.393	222.798	268.052	276.766	345.588	367.533	323.578	332.068	321.188	320.162	281.879	256.735	332.482	339.348	233.897	368.25	258.561	308.589	227.353	248.159	314.984	319.453	263.645
485.794	330.403	307.595	288.263	345.003	289.299	286.399	267.89	269.733	261.253	361.143	218.765	298.478	317.16	358.136	293.848	283.531	379.894	254.619	454.231	301.906	325.946	320.903	261.545	288.587	272.441	291.821	454.976	222.917	268.402	277.33	344.435	367.349	327.296	333.043	324.29	316.168	279.71	259.844	331.835	343.196	235.388	369.434	257.55	304.621	222.271	248.778	313.322	320.477	259.479
494.333	334.511	307.703	286.231	343.035	290.12	283.238	268.89	270.738	262.253	360.138	222.176	302.155	316.945	360.907	292.636	285.756	377.972	256.963	457.234	300.4	324.85	320.948	259.966	288.162	273.734	291.777	454.241	224.664	268.266	277.327	346.364	369.777	331.786	334.993	321.656	318.548	283.648	258.935	328.836	340.334	233.681	369.937	254.656	305.473	225.163	247.398	313.773	324.078	261.384
502.942	329.811	308.003	287.075	344.473	287.041	284.065	269.391	271.209	263.055	359.616	222.551	300.11	316.221	360.016	291.009	283.206	377.364	254.725	452.646	299.332	323.827	320.862	261.271	288.522	272.174	293.377	451.539	223.341	267.696	273.678	347.529	367.719	327.837	330.742	321.229	315.586	280.059	260.245	330.802	344.689	234.726	368.977	258.441	307.709	224.942	247.624	316.722	323.679	261.323
511.882	331.178	305.34	286.732	342.072	288.21	284.922	267.147	270.807	262.345	360.82	221.824	301.883	315.345	357.528	290.713	283.215	373.3	257.09	452.277	298.777	322.161	319.528	260.534	284.228	270.495	293.193	454.367	225.103	267.372	276.208	344.766	368.526	325.37	331.025	323.461	317.596	280.941	258.7	331.961	344.768	237.3	371.142	259.033	306.744	226.665	246.015	315.404	322.606	262.224
520.821	332.082	305.063	287.638	346.155	291.827	285.972	268.628	271.338	267.133	361.523	221.016	302.495	312.212	359.481	291.57	284.165	379.598	255.246	456.501	298.646	323.564	324.29	258.681	285.548	272.555	288.981	454.019	222.941	265.817	278.229	346.643	366.425	326.968	330.392	322.708	311.95	283.158	256.887	330.31	345.286	234.203	371.094	261.228	301.427	222.08	247.33	311.54	323.469	261.014
529.363	330.858	305.013	284.679	341.958	291.272	286.458	268.916	270.983	265.25	360.617	221.178	301.157	313.482	359.243	294.391	287.298	378.779	254.432	454.377	301.251	322.067	319.455	258.331	287.376	272.437	291.737	452.026	222.962	265.448	275.415	344.804	366.566	322.513	330.462	322.448	314.558	286.254	257.71	330.532	344.181	234.691	368.932	259.084	303.691	225.751	248.005	314.593	323.377	262.034
537.742	331.574	309.776	286.735	343.651	288.651	283.319	271.615	269.207	266.798	360.461	218.583	299.576	314.302	359.471	295.218	286.247	378.128	255.621	454.614	300.395	322.141	316.751	257.39	287.854	271.502	292.792	456.481	225.764	267.158	276.414	346.484	367.859	326.43	330.068	323.758	312.272	285.467	260.931	330.273	346.038	234.277	371.631	259.671	302.592	224.758	249.549	313.332	321.303	263.604
546.623	330.932	311.353	289.05	343.894	292.69	285.469	272.319	268.914	269.878	363.009	216.899	298.92	314.369	360.357	295.591	284.976	372.558	256.627	456.31	303.063	322.801	322.044	257.757	288.071	268.858	289.656	458.055	223.522	265.11	277.393	343.559	366.364	324.237	328.967	322.121	316.521	284.05	259.348	329.982	342.572	233.612	371.589	257.917	305.534	224.87	247.058	312.377	322.429	262.892
555.079	327.003	314.247	285.847	338.574	289.809	286.64	271.929	271.714	268.482	360.17	215.968	298.355	314.529	362.72	293.06	282.241	376.718	255.571	459.966	300.61	322.326	319.707	260.502	287.435	273.21	290.685	453.369	224.214	263.927	276	341.512	363.626	324.184	329.43	322.067	313.88	282.576	257.382	329.689	345.379	232.319	370.802	260.97	305.956	224.128	247.272	313.911	321.3	261.657
563.503	329.261	315.483	288.994	339.837	294.323	284.556	271.545	269.466	269.985	361.434	214.928	299.508	314.519	357.874	296.516	284.176	381.655	255.09	453.572	302.746	323.648	319.709	259.933	284.677	273.817	292.755	454.226	224.206	264.37	275.932	344.41	368.067	323.021	327.971	321.667	317.031	280.85	262.298	328.228	344.523	235.671	372.121	259.148	304.11	225.115	248.155	313.173	319.291	258.851
571.931	328.23	318.029	287.554	340.762	293.411	284.921	271.93	267.788	267.335	361.103	214.695	300.281	312.039	359.938	295.77	281.662	377.241	255.194	455.6	300.211	322.605	320.606	262.156	282.924	271.929	291.979	454.298	223.346	261.723	275.851	343.349	366.979	319.881	328.237	320.319	315.018	282.974	257.329	331.284	346.643	234.168	372.495	261.975	304.809	226.886	246.598	314.309	322.75	260.781
581.169	332.061	323.199	285.008	339.366	296.228	286.096	273.793	268.419	269.759	361.018	216.878	299.054	314.87	360.849	295.506	282.92	384.863	253.94	457.826	299.924	322.992	317.846	258.949	284.985	269.985	291.395	456.093	224.41	263.961	277.621	342.768	367.308	319.915	325.801	323.609	317.247	281.743	255.74	329.774	347.659	236.119	375.178	260.318	306.435	225.374	249.078	314.659	325.362	263.094
589.944	331.952	320.987	284.939	338.471	294.149	287.815	276.088	267.409	265.857	360.376	213.5	300.907	316.207	358.613	295.016	284.633	385.699	252.887	455.254	300.842	322.898	318.46	259.429	286.036	265.868	289.689	453.033	223.268	264.474	279.879	340.806	368.143	319.089	330.559	321.997	317.634	278.726	256.414	328.493	348.922	234.116	374.151	261.735	307.348	226.284	247.01	313.532	323.656	261.518
598.525	329.66	318.216	284.983	337.272	292.89	285.635	274.873	267.329	268.878	361.399	214.344	301.797	315.073	355.801	291.959	284.891	381.574	256.118	456.5	298.425	320.935	318.242	259.299	282.165	269.997	289.991	454.566	222.953	260.329	282.734	342.361	366.291	319.033	328.68	321.09	317.047	281.531	256.707	329.787	345	233.316	378.134	259.038	302.952	224.256	249.48	313.392	321.473	262.622
606.962	333.324	321.919	287.626	338.29	292.342	284.996	276.981	268.137	264.96	359.429	214.152	299.405	314.346	363.737	296.038	284.003	379.968	254.535	457.23	301.715	321.232	318.743	259.313	283.58	269.189	290.896	459.443	224.398	264.415	278.928	339.124	364.919	321.515	325.549	321.997	316.329	278.729	257.847	330.578	339.159	233.487	376.765	260.774	305.164	224.847	245.255	311.843	322.44	260.572
615.467	331.393	320.484	286.476	341.224	290.486	284.812	273.687	267.009	265.451	360.902	213.212	299.054	314.324	359.613	297.599	283.266	384.804	253.402	456.52	302.059	322.806	319.022	258.365	285.38	270.477	289.4	454.756	222.473	262.297	279.028	341.887	365.192	322.991	325.83	319.161	318.676	276.798	256.653	330.446	341.482	236.631	380.627	259.609	306.091	226.119	248.353	310.717	321.421	261.671
[truncated: 206 more columns]
