# Supplementary material for: Sustained store-operated calcium entry utilizing activated chromatin state leads to instability in iTregs
Source: eLife journal article supplement (doi:10.7554/elife.88874), 2023-07-04
Supplement: fig2-data2 [file 65min iTreg.xls]

## Sheet: Intensity Mean
Intensity Mean
Time [s]	Intensity Mean::1000018256	Intensity Mean::1000018257	Intensity Mean::1000018258	Intensity Mean::1000018259	Intensity Mean::1000018260	Intensity Mean::1000018261	Intensity Mean::1000018262	Intensity Mean::1000018263	Intensity Mean::1000018264	Intensity Mean::1000018265	Intensity Mean::1000018266	Intensity Mean::1000018267	Intensity Mean::1000018268	Intensity Mean::1000018269	Intensity Mean::1000018270	Intensity Mean::1000018271	Intensity Mean::1000018272	Intensity Mean::1000018273	Intensity Mean::1000018274	Intensity Mean::1000018275	Intensity Mean::1000018276	Intensity Mean::1000018277	Intensity Mean::1000018278	Intensity Mean::1000018279	Intensity Mean::1000018280	Intensity Mean::1000018281	Intensity Mean::1000018282	Intensity Mean::1000018283	Intensity Mean::1000018284	Intensity Mean::1000018285	Intensity Mean::1000018286	Intensity Mean::1000018287	Intensity Mean::1000018288	Intensity Mean::1000018289	Intensity Mean::1000018290	Intensity Mean::1000018291	Intensity Mean::1000018292	Intensity Mean::1000018293	Intensity Mean::1000018294	Intensity Mean::1000018295	Intensity Mean::1000018296	Intensity Mean::1000018297	Intensity Mean::1000018298	Intensity Mean::1000018299	Intensity Mean::1000018300	Intensity Mean::1000018301	Intensity Mean::1000018302	Intensity Mean::1000018303	Intensity Mean::1000018304
0	196.436	228.07	215.873	304.69	213.211	423.788	320.529	253.891	178.866	249.873	198.684	215.475	221.327	254.785	307.221	377.744	240.906	341.117	295.309	412.341	188.476	272.757	246.574	202.332	258.123	333.148	421.127	206.002	364.313	312.538	201.361	318.076	210.03	204.04	312.05	235.551	281.073	264.37	212.525	237.995	408.263	257.174	235.52	307.915	233.064	260.051	214.735	258.788	290.981
10.389	203.894	222.4	212.733	298.258	215.616	408.404	315.552	257.084	178.915	244.513	200.087	210.329	218.772	256.744	316.029	381.042	240.559	348.078	295.543	420.342	184.306	268.383	248.727	202.064	256.77	341.835	429.891	208.989	348.976	304.234	202.879	333.48	201.292	204.561	311.475	229.305	271.58	265.293	210.699	241.343	416.086	254.284	229.331	315.378	230.246	265.251	214.162	266.388	271.754
20.731	200.562	227.932	219.589	285.84	218.129	415.797	306.349	255.022	178.802	242.847	202.542	199.15	222.87	251.129	302.309	374.202	240.105	345.846	303.112	414.571	184.042	271.163	246.106	194.885	255.391	333.265	431.405	208.103	307.585	299.723	204.022	326.899	200.78	204.495	315.081	239.042	276.645	268.333	210.388	246.438	383.433	252.752	232.163	317.321	230.289	264.981	219.099	265.005	276.792
31.245	204.493	223.55	215.046	252.954	239.849	403.913	304.753	268.151	177.757	241.292	203.717	213.48	226.814	262.284	303.936	373.965	241.099	360.503	296.295	411.349	180.853	272.062	245.596	192.214	258.266	334.519	435.154	208.367	262.34	304.388	207.288	318.692	197.735	204.66	306.402	246.707	278.115	261.477	208.087	243.899	379.329	250.712	235.91	312.462	226.451	260.678	217.574	268.455	285.177
41.542	203.057	219.627	213.724	246.378	250.898	404.962	305.482	273.902	180.115	238.589	202.059		224.535		311.599	375.88	242.899	369.726	300.525	405.61	180.439	266.221	274.854	191.796	259.863	322.944	424.988	206.296	280.529	311.568	197.91	314.233	196.357	204.908	309.001	246.18	278.211	258.377	205.836	244.576	379.572	247.335	228.348	319.122	226.829	253.685	215.768	274.574	298.909
52.317	200.343	216.836	207.163	256.183	249.19	425.657	315.096	255.622	180.381	242.326	209.535		226.612		309.459	374.973	245.067	379.005	293.379	404.22	177.708	272.834	291.567	193.809	257.314	346.261	427.773	206.328	273.895	301.763	201.553	309.097	196.463	208.916	313.172	235.686	278.01	268.285	209.447	244.497	372.882	244.089	231.178	323.115	223.827	246.449	213.155	275.875	306.297
62.504	192.626	214.521	207.099	275.662	220.042	426.895	313.526	238.847	187.427	244.242	207.328	216.92	220.899	263.76	314.048	371.479	244.903	380.538	300.606	392.869	181.998	278.715	300.792	195.821	260.388	334.03	435.158	203.538	269.504	294.933	200.467	308.248	197.618	205.823	312.377	235.895	280.82	263.009	207.403	236.802	390.916	249.539	235.856	323.367	226.498	247.605	214.039	259.861	325.752
73.315	209.364	222.916	205.678	275.775	213.114	414.291	311.733	241.763	179.336	241.925	200.002	212.814	219.519	269.108	306.447	374.051	242.323	368.386	297.78	392.67	179.679	274.264	291.685	199.59	258.974	336.599	425.576	200.311	252.322	299.474	198.747	311.522	204.38	206.542	312.166	246.222	287.61	257.169	208.383	238.319	386.697	244.924	229.01	319.701	224.593	246.313	296.313	257.804	318.148
83.533	207.853	222.998	209.019	267.689	218.062	408.199	308.116	248.436	184.464	240.04	209.389	225.95	220.638	260.265	308.297	377.955	242.024	378.264	298.99	400.009	184.026	271.855	285.63	197	259.285	338.099	433.944	197.957	244.629	294.044	190.021	302.603	201.553	207.374	314.56	244.522	288.086	256.794	212.117	232.916	381.923	239.617	231.68	308.192	224.354	249.305	251.892	256.132	313.317
94.027	199.759	218.888	214.464	259.599	221.512	413.958	296.499	243.886	189.771	240.135	200.843	214.137	220.829	266.278	309.418	374.273	240.287	370.823	290.957	396.978	184.099	278.279	279.619	191.455	258.52	348.832	431.408	201.788	274.221	287.458	191.395	293.063	199.168	205.47	316.512	238.001	281.796	264.731	213.817	228.65	384.837	232.172	233.617	298.488	226.171	247.162	222.337	259.807	295.558
103.886	197.489	218.758	208.476	246.833	248.517	411.183	308.355	232.871	183.579	242.184	192.612	217.12	220.296	260.077	315.804	368.169	239.319	370.613	286.069	392.671	183.618	278.25	263.588	193.124	258.298	350.209	445.466	202.274	300.091	292.92	187.16	288.758	192.232	207.862	318.194	244.358	275.6	270.342	214.632	229.592	375.418	237.817	228.594	286.916	225.941	249.347	212.512	252.183	266.75
114.596	198.445	215.958	208.424	244.585	248.338	408.704	303.238	224.582	176.13	242.715	186.13	224.338	214.902	266.719	316.157	366.912	237.616	376.83	284.025	390.53	181.816	274.668	258.378	194	258.683	343.636	449.454	202.945	314.024	285.054	191.065	284.273	185.584	213.376	312.75	249.332	274.099	270.654	212.101	228.006	368.644	248.789	231.801	292.07	222.662	249.565	204.094	255.08	255.377
124.452	199.314	222.987	205.579	243.168	253.709	415.152	292.75	223.368	179.918	239.393	206.894	217.066	218.894	263.835	314.094	373.98	237.292	378.819	285.864	393.036	187.484	272.415	268.031	197.214	263.226	329.854	449.25	213.187	321.69	281.781	189.142	281.333	188.655	209.782	313.016	245.441	283.373	269.928	209.318	228.761	370.964	248.714	233.174	303.991	220.672	246.042	206.366	252.446	265.274
134.523	195.986	224.135	205.917	244.624	267.657	425.677	300.003	223.624	181.025	240.784	202.906	220.96	219.745	266.454	325.416	373.132	240.662	378.777	289.208	407.853	177.908	275.56	268.531	194.997	262.293	346.197	455.51	213.436	324.777	292.2	190.955	273.818	191.231	211.655	319.476	236.604	282.07	261.881	200.462	231.42	385.868	242.247	233.947	313.274	224.617	249.395	209.541	253.14	276.536
144.519	200.94	219.403	194.91	248.531	295.933	413.568	309.185	219.654	174.901	237.964	193.524	224.865	217.48	257.747	321.466	369.212	240.25	367.653	278.67	410.297	175.04	273.869	263.11	192.477	262.664	338.271	451.127	205.972	324.64	303.713	193.801	263.667	192.446	211.157	316.269	244.217	280.772	260.194	200.345	241.106	387.235	253.33	237.405	316.979	224.674	250.648	211.121	248.533	328.951
155.274	204.722	213.607	203.87	249.796	313.46	418.977	311.857	219.976	178.873	239.538	187.162	234.674	207.02	261.353	316.504	370.456	241.811	418.626	275.324	412.039	172.892	277.636	272.024	189.308	265.46	348.834	468.021	203.155	333.182	304.482	191.395	250.86	185.635	209.033	312.525	240.003	275.308	254.328	198.998	233.222	402.357	250.709	231.635	300.52	219.384	256.17	207.524	256.522	359.001
165.782	199.803	207.831	203.272	233.712	314.891	425.4	302.285	215.611	185.495	239.423	183.471	237.649	203.781	269.918	322.589	370.824	241.369	450.199	270.212	408.479	175.57	284.114	294.402	195.011	266.123	355.943	471.799	209.431	348.191	298.141	191.912	244.334	194.748	209.555	311.416	247.311	270.543	253.847	203.041	230.879	405.301	253.896	237.762	281.862	228.569	263.556	214.257	253.073	359.828
176.498	202.444	209.597	204.011	229.093	309.477	413.329	297.346	214.121	188.213	238.224	179.4	232.803	203.352	267.82	311.93	373.471	238.246	453.706	278.801	399.513	176.535	277.835	301.282	198.273	266.359	353.695	472.324	210.68	356.83	290.011	198.091	243.557	191.015	211.735	316.96	250.263	269.681	271.186	210.325	225.222	381.373	249.032	233.546	287.75	224.01	260.302	218.27	261.21	352.072
187.161	205.327	207.97	199.83	237.521	300.425	406.98	295.655	211.912	183.983	240.245	199.409	224.352	205.747	261.213	305.817	384.282	237.599	420.053	264.382	388.97	182.181	269.603	346.38	199.221	267.419	362.17	466.615	206.648	363.522	290.475	207.422	243.144	190.145	206.607	323.357	245.412	408.802	275.212	211.88	233.139	395.305	245.956	238.625	286.419	222.596	265.69	217.245	267.624	335.864
198.16	205.252	205.704	205.261	236.103	292.758	398.999	295.336	210.303	191.224	241.268	202.861	225.005	209.138	255.749	304.182	393.838	240.679	375.309	267.074	394.535	171.376	264.838	387.28	197.063	266.421	348.699	465.413	203.546	348.58	284.615	203.567	243.113	188.93	202.916	317.327	247.397	426.752	276.505	213.142	231.416	402.134	244.556	237.48	291.002	221.027	258.02	213.363	262.511	307.09
208.432	205.055	210.134	203.028	231.422	273.81	411.009	285.44	207.713	187.501	241.485	195.819	224.546	209.86	251.479	310.294	390.849	241.553	376.408	281.358	403.319	174.801	264.172	395.866	199.743	265.591	336.746	465.826	209.444	343.104	297.302	201.846	244.357	192.109	207.044	318.096	240.856	314.99	273.632	208.527	235.733	396.426	245.08	234.177	302.483	218.881	256.872	208.31	253.214	288.151
218.889	203.466	204.828	205.721	223.331	241.091	419.679	277.196	213.379	185.428	245.804	202.692	225.913	209.079	249.472	305.801	389.962	240.074	355.944	291.415	404.912	177.829	268.956	397.526	199.878	270.039	341.921	462.714	204.993	334.172	301.691	201.69	241.227	196.877	209.47	317.77	243.856	253.985	271.388	208.452	231.671	408.283	240.893	232.013	294.199	217.623	243.684	209.726	260.241	282.04
229.366	200.559	203.92	206.794	246.538	209.958	432.703	294.498	210.824	182.639	243.302	199.281	221.775	208.612	241.724	298.605	400.504	239.41	342.745	292.053	400.674	176.697	265.743	380.755	199.598	268.944	332.646	458.359	203.231	319.916	302.082	203.017	241.93	202.894	210.207	303.807	237.788	245.202	268.965	205.557	229.398	394.806	244.525	240.74	276.229	228.785	237.348	210.063	270.605	280.314
240.09	196.354	204.247	204.727	241.265	219.197	426.644	296.252	207.351	182.38	245.562	201.586	223.255	208.871	267.68	305.139	403.585	241.153	343.64	294.674	392.732	176.759	265.457	362.764	202.282	278.863	319.778	446.884	202.763	294.651	283.219	195.414	238.682	208.478	211.176	300.036	241.545	247.03	266.555	208.056	232.46	406.523	247.262	234.551	256.993	226.651	244.883	212.676	272.552	296.041
250.418	195.928	206.419	211.444	231.925	242.984	429.332	301.89	202.631	179.463	244.164	200.518	226.561	202.876	263.137	302	400.586	238.665	345.009	297.855	383.257	175.942	265.96	338.721	198.773	276.321	331.256	448.453	205.559	291.131	288.07	197.184	237.94	204.018	208.394	304.28	245.602	247.091	270.384	211.451	232.169	415.711	250.16	235.71	254.538	224.355	254.654	217.362	264.405	326.558
260.881	193.756	205.075	213.942	233.31	276.534	417.514	311.409	198.872	191.98	243.189	191.996	224.684	201.423	255.995	304.862	400.487	239.108	367.153	304.731	371.09	178.254	271.5	284.736	200.351	275.517	334.389	440.286	203.973	300.697	295.342	195.191	233.971	204.917	205.673	313.632	244.188	249.511	275.895	211.43	230.112	401.928	248.213	227.451	266.755	223.471	263.675	217.015	252.585	345.385
271.281	199.876	204.151	214.496	238.033	294.797	410.713	307.91	199.039	180.469	242.311	188.841	221.293	200.699	257.927	296.615	397.559	239.605	366.689	306.645	388.555	177.984	280.784	261.905	195.838	270.573	338.485	438.257	208.031	307.094	308.164	197.374	234.972	197.963	208.024	315.846	240.066	269.223	272.5	213.445	241.602	405.074	250.16	235.614	257.392	224.843	259.793	222.768	261.571	344.383
281.905	201.618	207.759	214.155	247.589	298.937	401.861	295.487	203.43	178.165	239.77	214.028	224.783	199.51	258.475	295.959	395.995	242.178	371.575	301.31	405.16	180.856	285.888	256.958	197.357	270.253	336.665	443.102	204.332	334.964	300.424	200.069	232.436	198.463	208.609	318.109	242.266	268.915	271.325	216.407	235.27	408.538	247.012	240.586	254.669	225.695	260.749	224.398	274.965	335.094
292.343	196.463	209.143	211.297	241.549	294.513	396.486	286.59	199.189	184.402	239.907	222.554	216.855	199.233	256.67	283.863	396.901	243.545	369.908	302.647	406.291	181.278	283.452	278.985	195.304	266.548	328.058	443.507	207.409	372.033	303.04	196.007	233.716	203.508	209.487	308.544	239.619	262.922	269.048	215.861	225.062	390.077	251.024	231.796	251.519	230.277	257.66	220.764	256.126	320.301
303.093	185.961	210.994	212.556	241.932	285.464	409.579	288.14	199.65	184.439	238.835	211.645	221.624	196.883	251.957	277.788	389.986	244.089	384.164	301.631	416.875	182.813	273.407	272.926	196.022	266.984	328.678	442.827	205.516	391.603	307.64	203.041	259.073	201.189	210.755	299.449	242.234	261.23	266.366	212.188	219.369	381.512	253.713	236.71	264.954	229.362	261.837	223.419	251.216	323.187
313.279	193.639	210.437	213.199	235.645	283.935	424.072	287.518	204.457	181.395	239.769	213.99	225.727	191.857	259.307	291.938	396.896	240.766	380.326	295.811	415.602	182.228	272.151	271.731	198.652	265.378	333.16	444.125	203.241	383.676	286.428	196.278	271.97	196.033	213.235	296.917	244.301	261.648	259.021	207.617	220.597	379.978	247.75	234.13	267.017	222.918	258.099	219.264	246.697	331.168
323.424	196.256	210.908	211.346	230.791	271.18	427.062	298.655	202.231	186.61	239.916	214.204	227.383	193.787	261.432	302.175	390.487	240.11	371.098	302.629	420.439	177.327	277.188	275.702	201.645	266.314	332.167	449.089	203.959	363.829	280.211	202.384	275.505	190.082	212.969	303.11	246.018	268.054	261.784	209.966	221.614	378.065	251.565	229.791	279.646	225.911	254.911	223.068	251.501	345.368
333.726	197.036	214.044	216.643	246.051	260.376	429.473	301.767	209.492	185.926	241.907	203.358	232.428	192.227	248.676	304.34	385.684	240.603	379.696	296.255	421.453	175.453	276.09	286.288	201.31	266.789	331.578	441.605	209.442	372.12	292.174	197.95	275.326	192.292	207.8	300.953	239.705	258.883	274.585	210.293	221.583	382.103	253.429	222.267	284.312	227.445	250.063	218.567	245.895	349.581
344.5	196.484	222.184	217.507	255.812	266.396	419.617	307.613	216.302	184.9	241.631	198.401	238.147	191.097	249.998	301.931	388.799	239.969	371.748	294.479	418.706	175.466	273.105	277.85	198.479	266.139	332.392	442.15	205.304	340.958	293.706	199.364	277.551	203.567	206.655	303.982	238.014	262.088	278.462	207.431	222.831	388.191	257.983	227.411	291.398	222.813	252.971	211.702	234.919	344.542
355.037	194.301	220.881	219.648	261.542	260.872	411.385	304.709	227.361	187.293	246.082	196.492	222.87	191.688	249.361	300.536	389.661	239.203	357.653	289.395	410.098	176.881	275.447	272.974	198.538	265.071	337.018	442.141	209.445	369.712	285.492	201.9	282.706	203.956	207.602	313.94	245.995	266.783	271.34	204.288	224.114	381.084	257.204	229.008	278.607	215.507	251.23	211.892	250.208	343.313
365.479	196.1	217.59	211.555	265.448	254.388	407.306	310.984	232.48	185.06	245.287	182.545	209.607	195.163	250.668	309.447	385.528	237.798	372.245	283.084	400.415	180.048	274.019	269.257	197.736	263.206	345.24	438.343	202.142	392.163	280.655	195.197	287.728	200.74	207.635	314.331	242.947	261.106	264.144	204.235	219.95	392.977	258.405	211.69	274.989	210.345	251.843	212.505	241.934	326.136
376.26	197.023	218.795	199.252	268.291	231.268	389.539	305.779	240.251	188.499	245.749	174.988	216.62	195.756	249.538	307.978	388.656	236.341	376.378	284.277	395.429	177.443	270.809	262.449	202.736	267.048	335.238	458.099	202.368	382.9	280.402	202.201	291.078	198.441	207.513	317.037	242.279	264.35	262.167	220.176	219.03	413.562	253.954	213.293	261.12	207.742	251.582	211.627	251.008	311.678
386.924	198.981	215.447	203.073	263.947	218.044	415.882	315.635	243.216	188.529	245.95	205.557	219.715	195.304	257.607	309.209	388.341	240.146	367.334	284.412	391.712	177.874	266.483	244.457	204.389	268.057	313.43	451.7	202.596	380.659	289.943	197.332	296.189	197.041	205.471	315.296	242.672	269.097	262.386	215.93	220.543	410.976	254.869	211.301	249.883	205.065	252.179	218.905	245.347	303.167
397.424	195.682	212.661	208.848	250.942	226.812	420.767	307.994	233.009	194.738	244.343	195.202	223.617	193.444	260.296	308.817	388.772	241.808	377.199	280.024	394.135	179.056	265.028	236.201	199.659	270.224	319.336	446.444	204.571	374.678	293.761	200.205	296.645	204.506	200.279	309.411	243.55	267.496	270.12	214.408	216.958	417.88	258.114	210.943	258.45	199.299	253.99	221.835	253.337	287.17
407.435	197.417	215.6	207.615	254.865	241.978	423.568	311.387	241.774	195.58	245.753	208.373	222.905	193.641	259.199	304.668	387.248	238.749	371.725	269.821	387.843	178.949	267.644	236.645	198.677	268.835	335.73	453.294	206.991	381.12	285.316	199.26	297.784	198.483	202.962	323.794	243.411	265.001	271.542	213.814	217.921	412.937	258.13	211.034	260.661	192.218	254.558	225.273	268.697	273.748
417.689	198.046	218.692	199.027	266.439	253.127	409.146	314.791	257.146	187.037	243.289	211.535	227.901	197.286	262.988	304.697	390.3	242.288	376.647	279.284	383.013	179.511	265.386	292.295	196.083	268.834	323.778	450.355	209.317	388.043	288.531	197.375	301.116	199.67	206.14	329.503	245.702	272.104	258.974	206.909	218.35	410.855	258.732	208.091	253.497	187.771	255.139	210.848	254.931	278.58
427.756	198.289	217.36	200.752	272.433	288.481	417.416	306.089	263.216	185.935	244.266	224.503	226.601	196.135	254.615	309.165	389.434	240.473	364.239	280.044	381.189	176.482	263.995	331.705	197.821	267.437	339.016	458.18	206.261	381.773	296.234	200.713	298.484	198.29	205.593	314.738	244.849	270.22	260.293	206.271	226.194	392.049	262.541	204.163	255.993	183.803	255.943	210.662	255.734	272.977
437.805	191.521	218.816	206.177	253.598	306.109	407.165	305.797	258.796	187.471	247.714	220.317	227.898	199.295	254.346	316.305	391.234	241.527	368.072	277.233	405.506	179.073	268.28	341.556	197.677	269.343	332.473	458.994	195.98	364.471	287.275	200.032	301.561	200.389	202.117	313.528	246.609	267.93	273.544	205.717	225.628	406.709	276.076	204.85	272.247	180.192	260.765	203.505	257.624	278.575
447.84	195.391	216.063	206.659	256.929	309.096	424.542	303.049	257.918	186.647	244.665	213.184	220.701	201.1	253.107	319.608	391.643	241.058	374.762	281.79	415.524	184.061	276.418	326.408	192.51	268.692	339.053	457.729	196.497	352.489	282.69	196.18	300.734	201.914	209.161	317.058	243.508	273.733	272.07	209.928	227.332	410.316	276.142	203.407	288.996	179.14	255.871	205.537	271.684	291.211
458.377	197.815	216.062	203.567	292.654	295.72	430.024	306.557	255.825	189.859	244.692	210.189	224.725	200.794	248.873	304.41	395.313	241.548	366.874	287.619	408.98	184.429	276.3	315.882	191.379	266.342	351.13	452.191		319.391	285.72	195.874	303.181	203.188	211.441	314.096	244.984	269.537	279.375	207.92	223.218	388.318	273.396	198.074	299.847	177.531	248.44	205.032	267.967	293.946
468.294	196.19	213.336	203.366	342.302	278.598	424.035	305.505	250.569	185.312	244.15	213.831	231.365	196.892	240.521	305.928	395.553	241.012	371.902	291.666	399.923	181.391	262.991	305.339	193.689	267.058	352.279	449.017		320.649	282.314	194.392	308.378	199.383	203.536	314.298	247.58	269.663	268.795	209.297	226.845	403.049	275.456	189.344	294.147	177.487	250.87	203.847	275.301	294.024
478.793	199.214	209.669	206.457	369.12	251.44	428.843	309.974	257.298	184.184	243.028	211.196	219.73	199.597	251.373	313.168	394.79	241.568	363.337	280.928	382.989	185.327	259.033	306.906	197.936	265.27	335.294	455.743		321.512	291.271	190.858	304.772	194.483	205.314	312.14	250.345	268.656	252.863	211.358	228.401	402.676	275.225	185.892	287.426	175.951	246.123	205.274	274.033	276.488
489.571	197.452	213.953	205.045	372.218	210.07	417.026	310.733	260.552	186.758	241.563	212.21	221.92	200.772	252.637	317.909	388.035	243.394	375.738	276.509	376.068	186.805	262.891	317.023	196.578	266.884	333.892	436.434		331.282	287.317	183.212	305.73	197.031	208.786	305.823	252.35	270.968	247.18	213.215	223.741	391.744	275.124	187.255	262.87		247.984	210.37	264.006	271.633
500.49	194.52	216.454	202.99	372.523	206.817	403.353	299.076	258.061	186.822	239.536	217.006	224.493	199.618	251.197	312.001	386.504	244.416	381.163	277.651	382.091	188.245	268.215	330.592	195.576	267.524	330.873	435.504		358.081	295.24	193.52	308.829	202.842	212.728	308.82	251.272	266.039	256.786	216.01	228.197	379.595	277.461	187.147	251.401		251.096	215.584	254.805	272.052
510.858	199.767	214.356	201.993	354.565	204.857	406.862	289.961	251.95	183.835	240.65	215.312	217.836	201.244	256.866	291.701	389.557	245.289	380.135	276.654	387.732	186.716	274.654	319.634	193.398	268.998	333.728	433.04		350.93	289.925	199.471	313.661	200.879	214.508	309.159	244.949	266.656	253.216	212.013	226.206	378.797	277.354	179.685	252.372		252.1	219.072	256.069	282.217
521.617	200.797	216.179	202.959	344.245	213.414	411.69	284.145	259.775	188.422	238.722	209.207	222.512	198.072	257.771	291.08	385.223	245.818	378.224	290.661	395.537	186.054	275.616	302.812	195.742	268.879	336.852	429.526		327.943	285.693	202.275	309.145	189.989	205.734	303.89	240.864	277.056	251.176	211.95	224.73	379.921	274.521	181.9	266.785		250.418	223.46	272.562	286.153
531.786	198.276	217.35	201.262	350.835	217.868	400.674	290.707	254.689	187.76	242.566	204.78	217.58	198.652	250.766	295.596	385.899	245.804	372.92	289.67	387.709	185.54	274.289	299.704	194.911	271.127	334.488	431.473		340.341	287.264	194.827	309.887	190.518	203.003	304.219	237.617	284.458	255.613	209.456	223.978	399.4	282.079	182.65	259.877		242.381	216.299	286.43	301.216
541.871	200.332	219.618	202.377	352.965	218.254	391.689	307.088	246.363	183.952	241.549	200.007	221.833	195.262	260.65	293.112	382.649	244.494	364.01	285.343	387.518	181.749	271.394	278.147	196.445	272.325	322.144	436.094		309.861	295.23	194.636	311.153	196.991	201.34	314.463	240.858	283.785	265.576	215.731	224.871	400.353	278.849	184.235	264.191		246.616	219.663	267.088	305.043
551.942	197.978	211.464	199.668	352.252	220.73	386.429	306.737	251.244	183.399	239.743	202.401	225.334	195.329	255.164	288.393	385.914	248.104	382.88	287.011	387.672	181.366	269.34	265.001	195.673	271.187	329.811	434.719		301.081	289.791	198.043	312.374	198.878	202.392	320.7	239.773	275.046	254.403	211.329	228.751	391.011	281.775	185.581	279.162		242.636	216.903	256.174	301.965
562.117	197.401	208.962	199.678	349.504	242.035	400.383	299.757	261.208	184.521	242.652	201.064	222.383	195.473	253.343	289.086	387.046	246.913	380.762	283.962	384.91	178.04	271.191	263.993	194.879	272.056	330.261	438.845		298.522	273.896	199.764	312.973	196.049	204.673	321.161	241.974	264.652	247.248	214.169	230.907	389.383	279.287	182.684	270.073		246.211	222.142	266.144	290.866
572.42	204.69	207.221	198.282	343.704	287.501	413.382	287.139	255.985	189.846	241.327	202.241	224.349	194.578	252.843	280.518	393.576	246.142	377.448	291.931	383.811	180.167	268.867	270.569	197.026	271.416	321.37	433.018		287.508	285.286	190.784	311.757	196.582	207.017	322.106	241.677	267.789	247.843	213.089	222.296	394.346	281.027	186.338	261.933		247.08	228.836	280.742	289.559
582.339	201.512	212.486	192.106	342.98	305.049	422.177	291.258	245.407	182.943	241.542	204.571	221.325	194.315	252.85	279.136	391.117	248.415	379.521	292.104	396.208	179.898	269.863	259.187	195.384	271.187	319.346	454.684		275.228	289.271	193.498	315.228	198.537	205.984	319.272	237.467	275.807	239.686	211.9	249.428	390.621	283.706	188.508	275.548		240.415	232.978	267.576	281.336
592.836	197.823	210.043	197.425	330.166	307.852	417.427	296.112	243.634	183.305	241.514	201.114	216.668	196.788	245.045	275.567	386.228	246.786	367.36	299.191	399.985	181.262	269.86	261.551	195.903	269.991	335.903	459.289		280.041	291.427	187.009	320.667	197.099	207.705	315.624	240.422	281.689	248.545	214.32	233.067	391.821	286.547	197.325	298.418		246.294	229.388	265.816	269.865
603.263	193.048	214.051	200.605	311.133	296.882	407.709	290.039	248.691	186.18	241.672	199.13	218.209	199.514	251.4	274.732	385.162	249.825	352.926	309.29	404.522	178.006	270.211	259.791	196.229	272.223	333.07	474.121		288.221	279.948	188.224	323	195.195	208.881	306.81	245.211	280.884	260.388	219.469	223.667	380.765	291.151	204.112	303.764		244.887	222.917	267.605	267.352
613.882	188.129	215.46	194.867	308.763	288.776	405.387	285.679	251.077	184.442	239.452	206.289	213.549	201.609	255.215	283.949	391.749	250.087	357.529	310.3	400.817	176.101	266.636	265.129	194.163	269.777	326.193	481.54		288.184	274.402	186.575	320.68	194.031	206.658	313.68	242.835	270.284	273.258	211.146	217.576	387.93	288.053	211.055	311.339		249.092	224.996	273.21	275.751
623.846	189.197	211.961	197.498	313.339	289.436	405.528	289.915	253.877	187.395	241.037	207.156	215.596	206.107	261.107	284.82	393.839	252.747	360.352	306.361	402.207	174.276	270.705	287.233	196.65	269.014	327.573	464.899		302.505	270.818	197.344	310.913	201.128	201.534	322.567	241.767	271.986	275.297	210.297	216.406	392.947	282.082	212.613	289.527		246.902	229.082	264.662	258.496
634.525	189.922	211.667	197.97	341.111	289.04	387.83	285.751	249.286	190.208	239.529	209.247	221.182	205.728	247.171	287.592	387.265	252.647	346.615	303.932	389.632	172.426	269.436	289.498	192.927	266.441	339.504	458.819		303.675	287.68	194.528	312.09	195.221	207.077	316.271	238.073	270.493	264.864	208.675	212.189	386.035	276.168	212.897	286.074		248.129	220.392	250.77	263.918
644.907	191.722	205.719	200.498	359.582	273.236	376.183	280.976	257.092	188.522	240.043	209.817	223.197	200.834	244.398	293.967	383.498	252.06	353.273	292.067	374.406	176.585	269.018	314.019	192.091	266.478	316.482	459.781		296.385	296.839	197.286	310.633	195.73	202.691	314.752	236.168	272.281	252.223	207.325	216.353	393.95	277.144	211.264	283.123		249.271	220.709	258.258	255.557
655.673	190.402	203.143	197.793	354.926	238.977	385.235	284.828	253.981	190.267	240.664	200.893	221.249	199.322	235.538	291.01	376.266	249.237	360.911	289.888	379.451	175.388	273.505	304.42	198.893	265.521	300.02	459.853		277.037	281.355	197.566	317.68	199.876	201.329	321.646	235.623	270.517	268.232	209.529	211.563	400.168	283.932	210.1	270.507		244.271	225.091	265.757	266.165
666.261	189.891	206.419	201.668	348.118	213.531	397.595	277.699	242.566	185.315	241.918	202.643	220.948	201.397	243.465	291.637	380.086	246.491	383.615	290.653	388.557	175.154	271.224	292.629	200.83	265.875	304.595	451.848		279.226	274.997	202.83	315.244	199.251	200.641	318.479	230.429	275.466	269.591	214.49	218.683	399.863	275.501	215.231	262.314		241.535	219.518	253.833	268.901
677.101	187.29	208.796	200.692	341.615	231.869	393.05	281.419	238.117	177.897	240.948	208.299	218.001	207.053	241.392	291.277	384.393	245.336	381.685	288.03	392.259	172.899	267.055	301.754	196.677	266.772	322.357	442.987		300.159	288.033	198.582	315.996	195.028	203.068	321.512	226.965	273.081	266.838	212.685	222.32	398.106	274.355	219.227	271.583		236.733	230.922	257.19	273.445
687.201	188.428	211.332	199.559	336.277	242.044	401.192	262.994	249.066	184.556	241.283	198.764	218.145	212.22	240.737	285.167	385.832	244.014	382.555	284.737	390.047	175.329	262.325	325.143	194.783	265.632	303.583	441.95		297.213	294.043	193.385	306.892	195.003	204.214	324.854	231.84	273.424	258.285	212.853	226.679	389.402	270.331	219.459	283.865		228.067	235.12	262.873	270.1
697.675	192.015	206.857	198.419	330.046	285.455	403.381	278.592	255.91	185.141	242.2	203.708	220.91	210.367	247.049	282.221	386.029	246.081	381.767	288.945	401.515	175.27	265.937	335.07	193.406	265.641	307.159	444.567		292.796	275.011	202.644	313.459	192.602	205.719	322.857	240.855	277.405	262.741	211.54	221.709	397.29	274.642	227.984	289.334		238.309	230.436	278.156	275.54
708.042	192.421	209.345	195.841	317.534	310.214	397.075	277.372	256.64	181.546	242.425	210.488	218.404	211.209	254.995	281.763	381.087	246.456	384.065	284.249	394.813	178.879	269.064	325.033	198.449	266.629	313.079	440.574		294.948	274.378	199.689	327.106	197.201	205.367	310.84	249.607	266.042	258.186	210.742	229.495	388.86	282.741	225.33	305.985		232.005	225.012	276.108	273.354
717.884	189.738	212.99	196.974	326.458	309.983	404.099	264.988	246.815	177.01	243.37	203.213	209.237	210.537	252.53	281.711	384.041	248.287	386.584	276.792	394.323	177.482	267.797	306.889	200.186	267.41	317.888	442.734		309.975	290.422	197.993	330.173	201.471	206.611	312.609	242.133	274.389	256.286	208.541	227.215	388.054	284.596	227.27	318.478		232.563	226.753	276.32	255.709
728.673	188.215	212.131	197.592	324.144	310.065	393.332	262.508	234.771	182.594	242.676	201.698	216.191	208.524	248.54	285.852	380.626	251.334	378.065	276.149	397.613	177.544	262.112	297.017	191.423	265.326	294.432	441.755		312.317	292.385	202.865	331.045	197.073	203.674	350.485	240.675	264.438	255.68	205.847	226.102	392.877	288.789	222.444	330.881		239.738	223.225	267.523	246.664
739.672	183.676	207.643	194.881	328.971	297.461	387.471	256.896	225.483	188.246	240.944	203.858	217.551	207.543	239.141	282.451	376.617	254.403	374.547	285.639	389.071	174.215	264.379	288.417	196.248	266.847	292.695	432.706		325.264	283.491	198.54	329.622	198.736	203.615	328.642	239.252	264.239	256.398	204.891	230.793	401.086	292.456	219.216	319.178		247.834	221.304	263.387	248.011
750.19	183.929	207.542	201.486	326.796	282.428	377.468	258.245	233.238	185.051	243.957	204.097	211.195	203.627	233.509	280.914	374.723	258.689	375.457	282.442	391.347	175.668	268.886	280.794	197.444	266.651	297.331	426.667		331.687	269.216	203.74	328.478	195.266	202.688	377.406	236.172	269.017	255.482	209.644	228.147	405.778	286.885	213.56	298.6		250.124	225.348	262.114	253.674
760.667	183.379	211.509	198.006	336.21	249.937	374.412	263.396	248.866	179.278	244.414	195.04	209.01	203.342	241.935	285.947	376.706	259.461	369.695	287.994	398.268	175.56	260.286	260.994	198.752	267.999	298.639	423.995		340.702	272.207	203.651	327.425	193.65	201.43	394.034	228.465	267.91	255.066	211.964	228.353	403.555	282.591	220.652	263.048		259.28	223.08	260.399	264.393
770.965	188.809	208.063	198.105	327.973	219.062	393.28	297.571	254.762	181.721	243.917	198.569	212.141	204.585	233.228	288.952	378.965	256.655	368.253	292.12	400.053	176.097	265.95	256.276	202.311	268.265	287.949	428.45		334.778	286.806	201.49	325.327	199.611	200.69	364.031	229.873	262.753	253.515	210.189	227.409	416.708	281.428	218.257	254.264		251.843	230.349	265.258	270.147
780.996	191.022	204.374	200.031	311.156	222.41	393.775	293.498	249.883	185.66	243.395	199	213.714	202.487	241.313	288.59	377.796	257.796	366.358	294.382	393.82	178.479	272.508	258.411	199.588	267.183	308.648	428.783		340.174	277.566	192.341	327.595	194.781	200.753	341.774	231.275	267.145	251.448	206.232	222.281	390.263	282.829	217.237	252.771		252.052	230.243	262.907	281.31
791.42	187.497	209.479	197.713	306.749	245.888	395.7	296.237	240.506	185.368	250.186	202.249	223.048	202.232	253.23	284.595	381.856	256.008	370.263	289.46	385.705	173.843	273.13	252.974	197.088	267.327	310.871	431.012		346.682	265.362	196.877	332.082	194.796	206.335	309.21	232.987	271.126	253.217	205.754	216.554	386.189	275.963	216.507	251.43		244.732	225.193	274.018	300.978
801.385	190.997	210.687	193.194	284.166	287.847	392.998	292.801	232.513	182.99	246.787	198.389	219.057	201.347	247.43	288.226	379.7	259.333	391.531	287.652	409.014	173.723	274.142	249.406	198.19	267.224	311.958	433.076		352.698	285.631	197.467	328.75	190.789	212.441	313.236	227.143	270.334	261.673	202.29	214.258	397.731	275.155	218.565	270.946		242.862	228.511	280.829	312.482
811.441	192.542	209.729	195.154	270.683	299.883	389.154	303.136	223.059	181.721	248.256	196.515	210.112	200.355	239.542	291.446	381.227	257.892	376.71	284.808	398.416	173.807	279.171	300.069	200.997	268.365	304.148	436.555		333.69	291.196	195.121	332.11	192.422	215.806	285.699	233.9	268.631	260.36	200.822	218.35	404.943	275.275	215.832	278.847		241.631	222.337	271.464	307.292
821.734	190.127	208.643	191.445	273.381	299.502	377.89	295.678	233.381	187.262	248.188	203.222	211.225	205.485	243.043	289.646	378.516	258.955	363.509	283.962	399.21	172.213	281.837	434.757	198.779	269.27		421.952		324.713	284.458	197.204	336.679	189.325	210.076	273.286	236.376	265.382	259.351	204.824	221.373	394.816	281.425	211.076	286.924		239.203	221.802	258.421	291.208
832.145	193.048	205.617	197.37	273.06	289.069	382.337	293.264	244.695	185.078	249.842	208.49	216.851	209.117	246.541	285.137	379.509	259.547	391.492	283.899	393.806	174.815	282.99	388.42	202.011	268.508		429.062		316.335	275.949	200.949	337.661	195.379	210.689	287.605	232.691	268.266	263.607	204.81	220.436	388.929	290.076	224.033	290.405		237.212	225.469	259.288	279.052
842.591	195.755	201.915	196.26	281.765	282.74	400.57	293.965	243.444	189.882	250.206	200.354	216.097	207.432	256.68	290.493	381.843	258.846	384.529	284.238	377.17	173.634	287.786	331.936	201.536	266.36		437.319		299.414	275.299	199.993	342.075	195.627	211.566	285.518	235.273	272.089	270.852	205.268	218.563	382.459	293.392	218.364	287.986		237.624	223.851	261.616	286.726
853.39	196.047	201.162	188.861	264.194	282.118	406.777	292.161	239.117	186.765	250.602	192.794	217.978	206.718	244.586	286.172	382.868	258.246	381.577	289.221	385.581	173.562	287.179	309.93	196.571	266.53	432.755	429.313		299.299	285.784	202	337.908	189.69	209.25	295.428	232.557	278.42	276.881	204.436	223.662	399.975	288.22	215.539	279.488		244.35	221.539	258.044	300.258
864.406	190.835	201.6	195.046	266.013	278.3	395.542	282.924	233.193	190.516	250.268	198.981	221.253	209.258	245.534	282.632	383.319	257.502	388.525	282.114	391.663	174.824	288.457	300.173	199.354	268.636	447.376	429.37		323.591	281.819	202.306	338.155	190.462	210.472	305.532	227.201	281.356	271.69	200.201	219.821	393.887	287.164	219.948	279.973		251.724	226.367	248.553	321.53
874.954	193.835	201.243	195.123	269.911	266.913	393.84	285.589	236.382	186.943	249.137	205.028	225.308	207.58	245.417	280.997	380.854	256.658	384.64	282.614	391.548	171.951	283.308	297.683	199.123	268.489	461.745	434.267		326.476	288.345	195.514	337.441	192.988	209.874	301.43	230.227	280.24	262.936	200.017	222.365	400.659	283.722	214.643	288.728		245.565	229.402	246.604	344.504
[truncated: 45 more columns]
