# Supplementary material for: Sustained store-operated calcium entry utilizing activated chromatin state leads to instability in iTregs
Source: eLife journal article supplement (doi:10.7554/elife.88874), 2023-07-04
Supplement: fig2-data2 [file 65min Tconv.xls]

## Sheet: Intensity Mean
Intensity Mean
Time [s]	Intensity Mean::1000064582	Intensity Mean::1000064583	Intensity Mean::1000064584	Intensity Mean::1000064585	Intensity Mean::1000064586	Intensity Mean::1000064587	Intensity Mean::1000064588	Intensity Mean::1000064589	Intensity Mean::1000064590	Intensity Mean::1000064591	Intensity Mean::1000064592	Intensity Mean::1000064593	Intensity Mean::1000064594	Intensity Mean::1000064595	Intensity Mean::1000064596	Intensity Mean::1000064597	Intensity Mean::1000064598	Intensity Mean::1000064599	Intensity Mean::1000064600	Intensity Mean::1000064601	Intensity Mean::1000064602	Intensity Mean::1000064603	Intensity Mean::1000064604	Intensity Mean::1000064605	Intensity Mean::1000064606	Intensity Mean::1000064607	Intensity Mean::1000064608	Intensity Mean::1000064609	Intensity Mean::1000064610	Intensity Mean::1000064611	Intensity Mean::1000064612	Intensity Mean::1000064613	Intensity Mean::1000064614	Intensity Mean::1000064615	Intensity Mean::1000064616	Intensity Mean::1000064617	Intensity Mean::1000064618	Intensity Mean::1000064619	Intensity Mean::1000064620	Intensity Mean::1000064621	Intensity Mean::1000064622	Intensity Mean::1000064623	Intensity Mean::1000064624	Intensity Mean::1000064625	Intensity Mean::1000064626	Intensity Mean::1000064627	Intensity Mean::1000064628	Intensity Mean::1000064629	Intensity Mean::1000064630
0	280.039	542.457	236.948	314.861	216.362	241.574	236.833	226.03	281.992	305.758	415.53	228.508	280.645	293.339	235.827	300.239	365.291	221.163	256.773	275.135	251.938	229.214	243.835	247.337	326.87	257.448	253.156	382.447	245.835	324.26	281.376	276.081	276.569	259.904	250.025	259.951	235.404	249.756	218.555	249.784	221.728	225.753	382.23	350.231	236.523	248.408	236.813	282.076	392.951
10.437	275.643	550.132	250.794	308.738	214.048	244.63	231.823	223.545	287.795	309.716	419.158	225.759	285.206	296.678	237.402	304.941	351.172	220.792	258.834	286.603	253.164	226.189	243.184	252.085	333.322	246.185	255.611	376.242	267.853	330.462	278.243	273.767	282.568	260.189	248.879	253.814	236.809	248.95	221.271	247.107	219.815	230.411	379.908	381.324	235.842	245.622	229.273	277.587	395.94
20.793	282.527	552.085	260.469	315.638		248.259	237.205	223.232	286.808	285.579	417.797	226.123	281.008	294.867	238.589	310.578	372.429	220.326	250.051	288.425	251.1	229.032	271.515	254.068	349.721	253.442	253.61	382.355	244.474	332.01	268.765	274.76	283.832	257.363	245.546	257.19	234.006	253.989	234.038	247.327	214.416	231.523	398.578	372.484	231.396	243.664	231.949	285.787	390.604
31.331	278.594	556.14	264.746	309.279	215.661	250.146	231.353	218.885	280.704	292.347	416.085	227.929	279.703	296.522	241.274	308.922	370.54	235.511	275.394	284.525	253.805	229.257	285	253.295	361.992	257.379	253.781	413.849	250.054	324.799	270.074	271.134	278.959	259.491	244.939	279.724	233.191	258.287	235.627	247.901	221.703	232.381	384.685	362.175	231.459	244.981	231.457	285.682	386.192
41.433	286.572	559.274	263.013	327.956		251.165	231.886	218.991	283.351	293.965	417.924	223.604	273.131	294.115	242.579	305.748	365.129	242.542	265.099	284.955	254.24	228.421	321.541	252.431	361.17	255.771	249.177	402.301	235.3	325.775	269.408	269.606	294.419	258.491	244.755	279.866	237.545	269.944	219.171	246.493	220.158	234.698	381.382	359.836	233.884	245.599	229.847	280.135	386.398
52.217	281.387	556.253	257.771	313.909		254.012	233.331	220.336	283.523	282.067	418.784	229.611	273.617	288.265	250.896	309.593	356.514	242.626	257.248	290.101	252.537	231.689	304.686	254.402	360.278	268.286	249.216	390.034	239.065	327	264.235	271.537	302.202	254.544	245.888	265.485	233.701	262.176	218.991	247.467	215.952	245.208	400.528	361.235	231.172	245.865	230.275	275.05	379.344
62.358	296.016	557.015	246.751	326.525	214.486	257.073	231.077	220.534	282.028	280.209	418.289	230.132	276.438	288.097	247.444	308.808	365.888	235.934	234.959	283.993	256.214	234.923	295.773	255.09	359.807	269.173	251.177	380.49	241.41	330.438	266.015	272.372	307.43	255.939	242.503	253.573	227.699	263.898	215.787	245.922	220.486	236.126	411.034	340.206	232.717	249.019	228.676	277.776	380.344
73.126	299.531	557.865	251.249	335.176	215.565	259.296	234.497	217.85	289.415	273.795	421.355	225.394	279.613	287.671	251.251	307.459	376.676	235.233	245.514	292.884	252.624	239.465	275.172	249.766	354.081	262.828	253.784	368.202	226.407	322.08	268.424	272.528	292.654	256.792	242.44	246.745	235.704	264.303	215.51	245.687	222.099	232.846	390.014	347.669	232.372	247.202	227.406	276.835	381.854
83.364	297.763	555.389	257.27	316.187	223.188	262.91	231.329	219.886	286.969	269.252	426.698	226.443	281.902	280.352	243.529	301.522	365.26	238.168	246.795	294.32	252.788	238.066	265.081	253.369	349.544	258.277	244.715	365.967	233.61	321.079	271.493	277.735	288.533	259.16	241.484	254.744	229.654	268.038		246.043	215.5	234.52	366.682	353.725	232.677	249.179	225.503	271.395	390.737
93.795	301.129	559.844	245.638	308.128	228.126	259.522	233.191	220.701	284.213	266.949	437.03	222.09	284.11	273.9	242.8	309.085	365.278	245.359	245.799	290.128	252.879	231.255	269.512	252.856	343.49	253.08	244.432	371.603	240.987	330.487	269.616	271.789	269.791	260.189	244.168	255.232	230.862	267.839		244.832	213.542	237.495	393.578	350.463	239.976	250.982	226.558	272.445	378.294
103.679	305.218	565.831	240.785	336.914	229.424	267.027	231.288	224.023	288.129	261.342	441.747	221.277	283.165	271.79	246.438	311.987	350.679	235.756	248.685	292.793	251.9	222.899	254.905	255.59	340.136	258.781	251.263	370.261	251.477	329.924	274.5	272.089	258.813	262.059	240.873	255.603	230.917	265.915	217.862	246.15	213.707	231.567	395.398	357.094	239.077	249.924	230.446	277.139	384.983
114.346	302.009	562.562	239.7	313.494	234.613	263.221	229.72	223.754	284.802	270.403	445.606	221.257	286.342	279.454	241.573	314.774	356.513	231.538	245.689	295.567	253.272	233.302	262.682	255.107	336.289	253.536	244.627	378.099	246.317	319.549	275.627	274.325	260.016	259.478	240.481	261.379	229.805	257.307	220.27	242.952		228.555	382.981	377.116	232.189	249.301	226.785	280.65	392.055
124.224	296.234	561.54	228.94	305.86	232.682	262.271	227.349	224.903	283.826	280.403	447.024	221.708	282.039	272.739	242.756	308.855	366.63	232.629	244.814	297.864	253.723	233.403	262.96	252.657	344.066	252.439	249.15	375	254.361	315.422	277.341	268.098	250.183	259.294	243.411	254.638	226.707	257.772	227.155	243.015	215.708	235.42	401.987	377.403	233.463	251.597	231.823	270.296	393.989
134.341	292.587	564.439	236.459	311.03	235.692	262.82	233.144	222.385	287.345	284.697	448.626	221.94	287.839	264.652	240.101	306.323	371.921	224.434	251.471	290.432	256.615	242.113	282.391	253.481	339.445	237.503	256.108	377.087	240.313	313.226	259.589	267.655	260.232	262.425	241.235	244.737	223.81	262.706	219.757	242.655	210.228	236.552	379.335	354.077	239.353	250.416	233.07	279.228	387.041
144.347	300.654	564.203	241.354	324.614	244.779	262.292	234.592	222.06	289.646	300.518	453	222.794	285.822	251.717	235.672	299.308	383.301	224.058	263.086	293.461	257.353	244.946	301.186	253.114	334.801	252.945	263.213	377.664	222.3	306.364	277.742	263.608	263.804	262.677	239.144	251.724	218.371	265.512	223.683	240.01	214.911	239.2	381.769	340.028	249.867	251.026	235.461	260.782	382.715
155.064	303.91	561.364	238.72	308.581	230.541	261.348	239.549	219.583	293.36	309.645	460.441	220.022	281.562	251.687	237.601	313.481	362.447	227.286	247.175	292.148	254.298	243.071	292.176	252.171	332.143	241.107	263.413	380.315	254.402	309.274	285.329	262.767	270.283	263.328	241.548	235.738	218.872	261.203	220.654	242.328	212.157	240.133	370.836	336.983	234.132	254.485	238.963	262.491	387.769
165.583	298.812	566.08	237.344	303.795	229.785	261.614	240.354	219.328	285.132	315.107	462.834	217.957	282.748	251.731	240.107	297.509	365.621	227.007	247.821	285.419	250.909	245.089	278.891	252.341	329.292	239.3	260.158	375.805	248.291	311.876	289.293	265.015	276.863	262.887	242.786	229.321	215.34	263.352		243.811	211.743	241.345	352.14	351.737	231.472	250.454	245.772	266.495	379.734
176.367	314.069	561.374	238.497	299.089	225.113	261.805	246.143	218.026	286.189	318.742	463.838	218.686	285.24	246.162	237.288	301.462	378.059	236.416	241.309	290.326	254.646	241.109	304.05	250.749	328.003	233.218	250.748	372.576	242.188	318.444	289.14	266.765	278.042	259.177	241.29	233.081		262.592	217.33	239.591	216.874	237.672	338.673	345.944	233.929	250.791	244.695	265.647	377.537
187.084	310.346	565.698	240.53	297.412	228.253	262.654	245.675	218.768	280.004	311.254	470.442	223.846	285.923	245.751	236.223	302.201	377.65	239.368	240.699	290.611	253.104	233.072	307.746	250.295	328.266	235.06	257.686	384.271	237.371	311.265	283.755	263.256	266.318	262.784	241.495	244.592		267.251	215.427	240.816	214.462	239.872	334.978	336.356	237.818	251.406	239.877	266.517	380.578
197.927	303.396	561.287	247.348	287.162	226.107	261.15	252.703	218.439	279.595	305.625	465.287	217.857	280.875	248.521	240.005	313.122	382.067	244.463	237.974	285.364	255.148	239.265	288.025	248.683	329.079	237.435	253.287	376.012	249.036	312.101	283.404	268.659	274.696	260.662	244.449	246.124	216.042	271.344	217.759	240.945	214.075	240.309	337.916	332.548	238.418	250.289	239.495	263.018	378.645
208.164	299.635	563.152	242.037	288.439	224.194	263.236	258.441	216.622	275.735	300.307	474.478	224.277		242.836	242.658	308.565	382.393	242.273	243.388	295.044	253.345	241.892	275.844	252.796	327.153	238.332	250.435	365.265	249.711	315.882	280.081	264.503	283.848	259.707	244.027	234.982	224.192	273.018		242.682	215.342	239.985	348.248	336.085	232.585	248.309	244.116	268.578	379.946
218.744	302.035	563.514	241.318	280.153	230.822	263	267.12	221.259	269.799	304.256	468.306	224.747	276.788	245.264	242.818	312.453	386.76	243.883	248.522	287.181	251.449	242.399	299.024	252.093	326.568	245.878	249.946	367.461	246.154	317.5	281.252	262.235	283.022	255.407	242.133	246.137	230.371	274.624	224.254	243.406	217.646	237.897	335.597	329.834	231.485	253.026	241.973	269.94	387.27
229.197	293.806	561.71	235.761	273	227.901	264.923	267.537	220.025	268.556	303.512	472.737	222.06		247.865	242.31	302.898	382.084	239.476	249.649	276.843	251.74	240.737	283.489	243.776	325.556	249.603	230.027	366.77	241.695	313.792	281.517	264.257	268.93	253.144	241.765	246.85	218.91	274.954	218.764	242.886	220.222	233.888	324.866	323.972	235.226	254.359	239.172	272.515	396.518
239.887	295.944	559.072	244	258.857	232.514	262.507	263.589	220.197	264.757	293.242	473.629	220.252	285.538	240.023	239.273	300.756	360.372	239.674	256.9	282.264	247.45	237.607	283.373	244.061	322.647	247.227	230.291	361.635	236.98	306.594	281.457	267.173	285.641	254.953	242.171	239.533	218.223	286.016	227.762	241.517	227.621	233.629	325.449	315.496	235.759	256.898	234.207	276.672	397.391
250.337	291.039	565.133	245.7	272.497	222.135	261.234	256.055	221.271	270.952	301.193	476.111	215.922	281.283	228.551	234.261	297.751	374.07	236.614	260.594	283.149	245.297	235.119	282.051	241.951	320.325	238.089	226.319	365.671	228.994	305.099	291.53	265.845	280.479	254.553	241.978			285.753	227.216	244.015	229.437	241.271	325.373	320.828	235.984	255.154	235.088	277.859	399.508
260.706	291.579	564.97	244.455	277.156	217.781	263.402	252.756	214.558	264.014	306.204	475.595	219.23	271.506	223.153	241.147	296.535	386.361	246.405	245.442	284.872	249.287	233.445	277.934	243.683	323.98	237.24		366.648	227.945	305.669	288.702	259.04	270.173	257.318	237.672		217.545	289.771	231.821	244.618	229.382	240.735	318.814	327.573	233.832	255.954	237.39	275.231	397.074
271.057	286.763	564.916	235.459	273.619	215.855	262.09	242.39		254.807	308.544	481.085	218.934	268.3	227.333	235.685	293.917	391.372	234.386	262.403	300.957	248.663	235.473	282.046	245.505	321.143	239.273	223.475	366.839	241.719	307.961	284.388	260.23	269.005	258.708	238.271		216.748	298.937	231.449	244.599	221.235	246.04	316.355	337.606	232.438	258.84	230.692	273.417	394.442
281.744	280.549	565.549	230.632	287.49	218.24	262.389	244.317	216.847	254.139	315.033	480.517	216.826		228.548	233.139	293.957	401.197	224.987	261.794	297.875	255.168	228.463	283.669	245.178	347.764	232.522	219.031	366.644	239.644	302.169	276.324	264.578	268.236	257.679	235.226	221.486	219.426	291.122	223.754	246.46	220.942	243.339	330.883	341.502	227.706	257.082	243.634	264.622	395.42
292.215	269.112	567.508	225.503	296.717	214.899	264.678	242.027	220.203	254.436	313.042	478.235	211.758	269.489	223.348	236.994	297.007	411.515	226.309	264.538	300.021	248.798	237.361	318.945	242.605	351.317	253.281	242.643	361.94	248.522	296.074	277.07	266.88	266.495	258.314	240.58		221.702	297.673	221.876	242.353	228.224	244.959	316.95	328.173	226.699	254.3	242.257	272.166	395.426
302.909	271.162	561.563	226.78	309.667	214.327	267.128	241.165	217.78	255.677	303.854	484.61		270.949	228.306	239.821	291.961	390.048	219.683	267.895	305.509	246.415	238.082	311.872	240.561	351.197	251.681	253.56	358.909	266.182	297.827	283.927	269.324	264.102	253.418	241.401		218.268	297.756	219.287	244.55	226.764	244.214	309.365	324.623	230.269	255.901	238.723	277.303	395.05
313.062	273.621	565.497	218.328	316.487		267.268	234.56	218.418	251.864	295.478	482.268			220.546	240.102	283.774	384.294	216.653	255.581	301.517	247.021	233.858	291.17	241.672	348.247	240.774	250.598	369.344	254.391	299.207	276.421	271.449	271.039	255.094	244.005		223.885	291.126	225.458	247.214	222.86	243.51	298.186	340.007	221.905	252.991	240.776	282.81	392.958
323.325	263.271	559.985	216.922	293.23		266.016	238.75	224.033	248.983	299.425	483.612			224.624	234.04	291.272	371.657	225.159	239.127	303.9	247.598	230.667	298.167	240.668	350.638	239.359	257.716	355.3	251.047	297.353	269.338	271.595	279.456	251.335	240.967	229.96	217.439	283.921	221.015	244.815	215.947	241.912	303.373	336.403	222.093	255.14	240.045	280.428	392.251
333.534	280.493	563.858	221.585	298.352	218.922	268.08	237.665	216.733	251.149	296.441	480.444			225.115	234.655	284.709	384.125	229.115	245.188	290.929	248.271	233.32	268.676	242.144	352.075	242.181	252.883	350.187	231.088	298.296	275.706	262.446	286.21	251.746	243.016	229.22	222.396	284.585	223.514	243.302	217.368	236.728	299.3	345.138	217.379	262.256	241.009	276.395	385.919
344.264	275.794	570.399	224.486	291.584	213.563	267.069	238.921	218.447	246.821	303.446	479.344		269.626	222.912	235.603	276.512	381.814	234.482	244.072	291.489	248.718	239.994	274.914	242.027	353.162	240.59	252.092	358.506	242.656	299.29	276.614	269.883	283.638	254.472	245.101	239.037	218.859	284.11	219.748	242.464	219.441	241.178	306.117	341.11	218.446	265.801	237.585	287.214	383.699
354.905	265.278	563.23	224.759	280.307		270.646	235.116	224.71	246.573	303.826	485.569			227.714	239.855	273.371	371.591	237.678	254.815	278.61	244.112	240.331	286.564	239.907	346.292	241.82	256.908	362.264	251.013	296.954	277.225	262.189	280.986	251.841	243.865	258.651	222.993	276.901	225.636	244.714	224.615	238.24	315.807	332.281	218.45	269.239	232.442	281.924	382.178
365.277	256.789	568.791	218.899	277.57	212.763	270.618	232.358	226.233	245.588	323.793	484.603			230.647	237.916	269.091	368.783	241.43	248.63	278.427	243.497	242.149	266.87	242.594	353.694	239.663	256.228	361.061	251.839	298.664	279.796	266.809	279.411	251.664	242.749	256.026	217.069	277.315	226.65	245.298	223.013	237.722	330.903	338.067	212.529	267.243	230.153	285.34	381.776
376.101	259.211	564.638	229.241	285.262		268.415	230.47	228.655	247.549	316.887	481.668			228.202	245.041	277.386	371.029	244.719	253.673	287.308	243.686	244.211	267.11	235.665	352.121	237.84	254.727	350.919	236.75	289.165	281.346	270.516	277.45	252.024	241.378	272.357	212.813	282.969	228.283	242.859	224.799	237.045	329.049	362.715	216.805	263.54	225.604	282.171	385.558
386.721	264.266	558.926	236.503	283.711		268.972	236.202	224.075	244.826	309.189	482.408			230.241	244.168	269.25	373.876	234.969	252.47	292.564	247.553	240.718	241.538	237.068	347.667	233.522	242.352	351.239	235.069	276.551	280.405	275.84	266.35	253.216	242.346	287.973	217.54	283.974	225.516	243.602	226.386	238.636	318.703	348.476	213.478	266.39	228.78	280.911	388.573
397.229	270.107	560.236	244.031	284.286	213.773	269.773	239.61	222.648	244.42	308.338	479.684			228.989	237.801	271.9	353.927	230.594	268.619	289.771	246.84	240.833	241.565	241.866	349.189	234.86	241.962	347.427	231.526	287.992	286.305	272.535	258.615	254.809	244.859	274.458		275.404	222.083	241.048	227.722	234.749	305.114	344.744	217.527	265.61	230.262	277.276	395.347
407.178	279.484	560.261	252.627	286.69	222.454	270.79	241.572	218.923	247.401	312.925	479.403			228.112	239.149	262.093	359.096	239.674	258.459	291.389	246.851	241.164	243.005	237.639	346.146	238.14	249.141	342.417	222.716	290.902	286.677	277.132	259.647	255.526	243.211	251.908		282.582	224.688	244.07	217.123	233.917	300.044	330.47	213.789	267.429	239.175	283.447	387.948
417.474	269.326	559.173	251.958	302.768	221.164	270.398	249.615	215.113	251.683	306.388	482.431			224.432	244.533	267.596	363.214	241.727	258.483	287.457	247.677	232.545	253.513	241.619	338.597	240.745	245.962	330.037	235.953	290.214	289.543	278.583	278.389	253.502	243.489	255.278		273.537	224.617	241.197	224.179	230.565	314.532	324.875	217.124	266.281	242.624	283.809	388.079
427.557	279.43	562.03	257.465	286.742	222.155	271.502	263.41		248.209	298.881	487.303			229.079	242.953	265.481	357.247	244.892	265.469	286.544	249.102	233.667	240.473	240.833	339.798	235.588	236.44	335.186	239.106	280.549	291.177	277.505	271.856	252.205	247.011	232.409		272.472	224.737	240.111	219.108	233.358	331.506	324.011	218.267	264.951	248.767	287.104	391.952
437.6	281.281	561.736	260.004	282.973	216.374	268.56	261.566	212.21	248.67	294.545	485.944			231.16	240.021	267.276	361.017	248.1	263.252	281.989	250.308	231.778	235.266	237.038	332.296	240.503	236.408	330.487	225.732	284.736	292.332	274.383	271.758	254.895	245.892	247.005		271.972	224.467	239.403	213.906	233.06	321.905	313.011	215.698	261.796	247.454	278.06	389.077
447.654	285.402	557.985	260.199	274.03	211.524	267.959	256.742	217.128	253.811	279.38	483.888			226.769	238.716	261.489	371.862	245.888	258.785	279.574	247.732	235.497	247.705	238.209	336.233	232.435	236.007	331.142	235.778	281.609	288.76	264.426	263.439	252.389	245.605	240.42		275.216	215.34	240.011	214.852	229.133	314.471	320.989	216.048	263.156	243.451	274.827	389.113
458.112	283.564	556.152	264.391	276.515	215.385	267.657	252.775	217.293	251.698	283.427	488.692			225.11	236.924	262.453	365.155	251.257	258.988	278.064	249.051	227.587	263.048	234.36	335.294	233.32	232.26	347.492	242.743	280.656	277.617	258.233	263.33	247.971	247.519	252.384		274.977		240.016	220.525	229.342	310.218	323.371	219.622	264.223	240.926	276.383	382.833
468.075	275.808	555.361	256.71	267.891	215.09	269.627	258.136	215.74	253.324	283.534	485.602			231.879	236.072	261.375	367.871	249.195	240.259	271.112	249.984	232	258.487	235.912	333.148	227.83	236.556	343.94	233.027	282.298	266.736	260.015	271.539	253.033	245.753	256.533		268.935	212.884	235.978	225.297	225.815	310.053	310.947	219.361	266.104	235.12	286.416	387.524
478.641	265.798	554.846	250.41	277.656		267.893	268.071	220.483	252.838	290.673	486.697			230.782	229.759	256.419	360.559	244.559	253.523	268.61	253.655	234.284	245.005	236.564	333.421	236.151	239.775	345.273	257.296	285.067	264.734	263.099	273.956	253.914	246.37	276.925		274.379		236.887	219.482	228.355	306.977	325.785	215.597	265.671	231.863	290.887	385.151
489.339	260.323	554.437	253.995	277.579		270.086	261.671	218.789	251.427	284.08	492.503			229.488	230.97	261.877	358.953	256.024	248.137	267.468	249.865	232.938	254.7	234.784	337.059	235.399	230.283	334.085	238.02	270.821	271.995	260.952	266.995	249.99	247.468	258.67		273.903	217.113	233.87	218.282	226.967	298.401	328.165	212.618	267.736	230.967	283.143	383.379
500.359	270.973	558.63	251.057	286.839		272.531	259.215	220.84	248.659	281.551	487.891			227.976	228.744	265.541	351.765	247.382	237.821	266.593	251.644	231.704	234.406	231.224	347.673	242.762	227.949	327.963	257.345	276.177	269.71	265.865	261.353	252.17	249.307	248.025		273.192		236.251	213.092	229.578	309.855	333.897	213.017	267.745	233.89	276.447	383.118
510.655	268.608	555.447	244.956	284.327		271.564	254.067	220.632	248.14	301.432	493.053			231.229	229.105	263.53	339.295	251.221	252.22	270.631	252.624	230.404	248.196	235.313	349.182	231.12	226.73	318.732	241.904	285.855	262.765	266.593	265.706	252.607	247.853	247.588		271.042		236.83	212.538	229.124	288.957	326.303	216.461	264.346	232.39	296.916	384.703
521.455	272.963	556.693	246.528	287.521		275.084	252.345	220.457	246.661	304.801	496.834			227.153	233.385	261.075	345.529	255.533	249.255	270.748	250.354	225.946	263.97	233.084	349.691	238.303		310.176	233.09	275.37	264.743	269.2	265.51	252.133	248.849	254.461		275.113		235.821	214.411	219.702	285.232	310.606	219.486	268.024	233.02	281.357	387.08
531.579	269.411	556.742	246.8	297.948		274.318	250.549	218.117	251.89	304.056	497.599			222.557	227.373	263.433	348.275	259.027	234.581	266.601	250.573	222.125	271.344	233.255	348.054	233.92		308.12	238.249	264.548	265.727	270.305	257.101	251.822	247.337	246.244		274.839		231.405		228.115	283.213	309.492	220.014	268.829	229.197	287.939	385.716
541.648	265.015	553.601	236.258	287.397		275.068	251.466		248.058	298.675	497.16			219.893	231.6	256.805	347.089	259.851	242.683	287.494	250.258	225.2	247	233.543	345.951	232.434		303.673	253.686	264.229	264.813	272.829	259.35	252.665	248.857	247.772		273.691		232.861		227.272	309.446	311.955	215.752	268.207	231.963	279.88	388.463
551.71	265.093	557.584	231.861	295.376		275.309	253.542		246.897	301.351	495.9			223.121	232.97	251.462	351.889	256.424	253.798	290.677	246.64	233.475	270.419	238.199	345.404	228.809	222.109	296.459	246.095	268.098	264.005	269.814	264.175	251.281	247.049	253.434		271.37		231.708		219.914	308.945	306.152	216.581	267.257	230.984	267.219	384.323
561.866	261.604	556.701	238.797	298.003		272.678	258.803		246.925	302.231	501.203			224.006	231.238	256.193	363.859	256.93	256.078	296.546	245.422	228.148	264.676	232.839	342.516	234.544	225.959	297.662	232.948	272.114	267.971	261.101	265.687	250.895	243.261	236.329		274.539		231.608	212.167	219.577	301.523	302.992	211.676	267.178	230.274	261.966	385.787
572.28	258.1	553.342	236.179	297.994		274.84	257.233		249.464	300.322	506.055			221.425	230.829	249.74	356.237	249.315	247	293.517	246.204		256.164	237.165	344.783	235.765	223.921	293.95	232.77	271.324	270.683	260.262	266.959	247.716	246.621	255.801		279.721		234.675		213.835	299.325	301.581	215.718	268.96	229.293	266.982	380.728
582.113	260.451	556.72	250.653	318.36		277.884	257.521		251.749	299.243	501.804			218.468	230.47	242.17	359.212	248.358	252.855	287.992	248.282		238.306	236.416	339.436	229.778	224.853	282.402	227.095	269.853	262.383	252.511	255.593	246.181	247.714	262.719		270.845		229.8	210	223.727	295.885	317.352	210.269	267.269	233.378	271.845	384.186
592.65	248.166	554.956	248.24	319.837		275.965	260.564		246.547	311.976	499.864			220.051	233.788	232.458	346.249	245.588	263.989	282.788	248.046		233.593	235.81	335.766	230.96	228.746	279.1	222.045	271.445	255.295	255.196	247.606	245.939	240.561	239.702		261.031		232.945	210.782	225.159	294.775	309.558	214.487	265.187	233.91	266.842	383.428
603.104	240.593	557.952	243.095	316.594		278.517	260.477		244.877	320.866	504.617			221.667	227.139	237.537	345.337	245.425	265.509	278.18	250.464		240.32	239.328	336.892	234.656	231.083	276.725	229.967	262.177	248.413	259.046	252.522	244.803	247.564	228.992		251.143		232.693		224.905	291.432	313.782	213.694	269.261	230.053	265.29	383.658
613.629	233.005	567.019	245.911	323.45		278.688	253.613		247.388	316.376	506.291			220.956	230.364	232.321	365.447	240.517	255.561	277.727	248.675		246.208	238.829	338.251	233.898	236.338	279.224	237.44	258.568	252.165	266.082	249.165	244.602	245.725	223.302		249.903		232.08		228.007	290.297	313.328	218.431	268.167	231.865	288.919	384.293
623.625	241.324	575.856	239.142	309.33		278.487	253.152		250.367	310.676	502.206			225.338	231.03	229.106	358.783	239.989	266.363	289.592	249.361		243.031	236.195	337.171	236.978	257.967	282.933	236.423	250.841	242.516	262.234	265.69	248.844	244.111			250.077		228.189		228.214	292.534	317.551	219.441	269.617	232.27	305.072	389.836
634.438	242.813	576.571	236.547	300.298		279.855	247.026		248.693	303.352	503.499			219.892	225.09	228.888	343.018	238.17	272.547	290.859	248.979		252.787	234.606	336.76	229.261	251.152	269.712	237.894	247.31	236.165	264.141	275.16	245.711	244.435	221.429		248.368		226.163		222.856	329.422	310.264	220.574	271.225	229.117	281.413	391.194
644.739	253.246	585.025	229.912	308.062		276.405	237.312		250.558	297.167	500.786			224.02	225.69	229.442	342.944	241.638	286.013	286.758	248.41		233.354	234.659	358.932	232.397	251.637	273.96	228.092	251.627	246.327	265.421	278.241	243.299	240.978	219.771		248.572		232.432		218.637	327.594	295.079	221.041	273.237	230.363	268.335	387.116
655.449	253.421	594.714	242.088	308.778		278.509	236.114		246.6	295.46	505.284			220.038	229.763	228.625	349.707	227.423	277.212	285.701	250.4		237.898	234.862	355.727	234.28	258.498	264.749	233.467	249.234	252.064	264.153	281.216	245.005	243.216	220.615		248.065		231.479		218.252	320.145	302.446	220.126	273.128	228.821	278.307	393.202
666.059	249.14	610.512	244.143	302.208		278.863	238.509		249.531	300.514	511.092			223.437	233.75	229.438	353.291	227.162	265.898	287.916	250.102		254.886	235.079	361.997	232.779	275.951	275.471	240.051	250.852	253.901	265.583	265.16	248.087	240.944	229.465		245.231		227.127		217.632	315.718	301.254	217.008	273.12	229.72	276.43	385.169
676.947	261.691	623.935	243.759	317.827		277.031	234.896		247.669	290.829	509.319			220.021	226.897	228.588	356.523	229.057	246.366	286.58	251.685		254.377	241.285	360.824	234.203	261.85	270.712	241.272	249.486	262.116	264.365	261.43	246.036	243.32			245.398		230.07		216.085	311.333	290.862	222.311	270.401	230.161	275.39	385.291
687.022	260.004	622.021	236.275	319.404		279.519	240.883		245.709	292.149	509.91			230.304	231.214	226.689	359.114	227.382	266.175	280.281	252.528		258.836	235.171	369.294	228.491	259.991	269.159	216.132	248.259	263.706	273.124	261.783	247.876	240.765			241.19		230.086		214.158	309.908	288.064	222.326	272.734	229.421	290.233	382.412
697.43	258.465	620.263	238.838	325.163		276.742	242.235		247.082	295.77	513.591			227.323	227.595	229.007	364.922	223.122	266.101	282.388	249.642		250.005	236.703	376.383	226.722	242.058	259.611	224.891	246.065	262.985	275.829	256.636	248.691	242.509			238.252		227.568		219.472	309.744	285.753	217.25	275.012	228.962	265.097	383.607
707.812	250.414	617.48	232.371	330.715		275.043	239.086		246.568	288.224	522.089			225.103	227.473	229.994	353.243	214.714	266.354	282.296	248.919		258.271	235.768	379.58	232.943	248.787	261.7	230.561	248.678	271.174	275.131	258.069	247.07	243.876	219.566		235.985		228.454		219.227	299.091	286.371	217.883	271.636	231.191	257.343	382.327
717.707	251.167	621.196	239.797	327.02		275.538	244.679		245.434	287.569	539.678			225.806	223.479	226.558	350.305		257.753	288.691	246.213		273.269	233.594	373.414	230.451	232.439	259	244.341	247.096	271.303	278.848	255.1	245.351	241.565	235.204		234.735		230.538		213.304	303.468	296.952	212.32	278.731	225.578	266.097	381.893
728.547	254.145	612.537	245.132	335.425		275.456	253.61		245.963	296.583	566.24			226.18	219.163	238.073	364.796	224.688	249.834	288.187	247.925		249.755	237.976	380.775	229.713	234.847	254.005	243.976	244.787	276.359	280.264	266.359	244.769	240.308	245.188		236.828		229.104		209.474	297.696	305.171		275.072	228.899	270.145	381.199
739.514	256.251		240.794	333.615		275.37	251.717		250.521	293.258	567.15			220.679	223.174	242.028	354.812	215.081	251.033	280.702	246.733		231.075	237.225	375.117	229.48	232.556	253.957	245.34	242.5	277.873	280.376	267.995	246.919	239.054	251.079		236.56		232.937			294.159	303.828		278.573	226.853	266.712	379.247
750.023	251.209		244.835	344.882		271.946	245.835		249.724	293.683	571.398			226.277	222.432	235.284	355.501	221.392	250.585	278.613	247.122		240.136	235.703	371.667	229.904	231.121	253.889	264.798	243.467	274.264	279.694	275.019	243.707	241.78	236.058		237.527		230.192		216.544	288.794	300.768		278.471	225.129	272.627	366.762
760.466	241.483		236.238	326.493		273.179	254.209		247.218	298.644	568.115			224.35	223.404	236.03	360.772	214.786	255.758	269.333	246.984		233.497	234.916	368.857	224.216	228.94	256.339	260.171	240.974	280.545	281.115	272.29	243.985	245.023	244.35		235.825		228.034			296.548	292.705		276.47	222.831	270.242	372.985
770.75	243.62		236.826	335.863		271.398	250.24		245.21	304.122	550.161			222.597	227.109	230.844	358.006		251.198	272.78	248.418		223.627	234.75	361.942	225.152	231.932	253.806	239.045	238.768	280.67	280.925	273.367	244.468	248.111	249.638		237.317		229.862		214.209	293.139	288.216		276.374	226.825	266.443	368.284
780.764	246.916		241.55	331.218		274.875	256.302		246.759	306.273	526.818			221.854	229.493	236.882	349.655		247.477	276.992	249.995			233.155	365.389	236.261	229.165	253.674	228.244	240.569	280.216	284.583	277.374	241.661	246.94	252.646		250.682		230.6		224.45	291.182	286.936		276.983	225.308	251.045	374.042
791.307	244.227		251.34	326.949		275.329	259.495		246.012	299.378	487.212			219.898	224.338	234.944	354.237		250.867	271.339	249.62			236.728	363.366	228.637	227.496	252.585	236.061	242.025	283	284.901	281.263	244.82	243.983	256.402		254.097		229.265		214.947	282.052	284.914		280.408	227.271	263.688	376.072
801.283	235.716		261.147	345.674		273.115	251.775		244.915	305.383	479.849			219.908	228.253	231.987	357.065		234.762	276.879	249.821			236.034	363.234	224.476	231.341	250.751	233.257	237.09	269.564	274.323	290.068	241.043	245.011	240.296		253.476		229.076		213.673	287.394	300.957		281.184	229.74	253.745	374.726
811.199	239.99		265.162	310.768		272.155	246.67		244.227	302.626	470.951			221.299	229.3	232.088	347.556		238.414	274.591	252.287			236.491	359.221	222.477	241.153	252.923	236.212	243.358	262.554	276.699	283.454	244.524	239.205	241.073		245.81		227.817			290.244	287.427		280.661	225.147	247.552	370.018
821.553	249.224		266.814	329		269.271	243.846		239.934	300.105	464.784			221.231	229.968	227.903	355.56		240.305	268.536	251.383			235.665	361.56	230.312	248.737	249.729	235.719	240.431	260.314	277.724	297.314	245.591	236.684	245.743		247.691		229.156			299.13	275.986		278.18	228.311	247.328	374.285
831.99	247		267.029	310.208		272.009	238.105		240.483	299.518	458.875			223.108	232.491	228.169	346.476		238.543	267.677	249.273			234.164	358.599	228.359	251.117	245.553	214.539	238.548	251.733	282.147	304.928	244.402	240.211	238.377		238.543		226.174			302.027	276.635		278.388	229.796	255.476	370.333
842.412	252.12		255.41	311.358		270	242.065		238.75	297.13	449.291			219.565	231.316	225.189	331.586		235.518	278.952	250.596			235.773	358.907	229.645	254.913	252.383		240.287	249.485	271.368	300.237	238.687	239.04	237.767		236.121		229.54			308.967	276.838		278.704	232.316	253.261	370.469
853.187	249.027		250.323	308.531		270.003	234.799		239.143	286.882	437.224			220.817	227.364	229.26	333.144		222.247	270.521	249.359			233.11	357.965	228.45	253.295	248.587		238.147	241.777	269.917	300.276	237.67	236.475	234.951		242.367		224.819			303.36	295.667		281.069	238.223	251.542	362.126
864.14	251.281		249.223	308.165		269.186	235.006		240.333	274.489	430.667			218.596	231.494	228.885	332.738		225.693	277.94	249.058			233.283	353.982	228.421	256.8	246.167		241.783	244.391	270.657	292.219	240.061	238.484	243.609		234.683		227.27			302.577	314.93		284.037	233.945	262.68	362.881
874.734	244.858		250.495	303.604		271.506	234.54		240.542	262.667	425.396			217.471	229.442	230.622	321.246		234.16	281.188	246.455			233.697	356.53	219.131	258.519	245.095	214.107	240.862	243.778	272.215	289.368	241.9	238.438	222.039		241.689		227.793			295.678	299.726		281.786	240.938	254.099	370.155
[truncated: 206 more columns]
