# Supplementary material for: Sustained store-operated calcium entry utilizing activated chromatin state leads to instability in iTregs
Source: eLife journal article supplement (doi:10.7554/elife.88874), 2023-07-04
Supplement: fig2-data2 [file 65min tTreg.xls]

## Sheet: Intensity Mean
Intensity Mean
Time [s]	Intensity Mean::1000038701	Intensity Mean::1000038702	Intensity Mean::1000038703	Intensity Mean::1000038704	Intensity Mean::1000038705	Intensity Mean::1000038706	Intensity Mean::1000038707	Intensity Mean::1000038708	Intensity Mean::1000038709	Intensity Mean::1000038710	Intensity Mean::1000038711	Intensity Mean::1000038712	Intensity Mean::1000038713	Intensity Mean::1000038714	Intensity Mean::1000038715	Intensity Mean::1000038716	Intensity Mean::1000038717	Intensity Mean::1000038718	Intensity Mean::1000038719	Intensity Mean::1000038720	Intensity Mean::1000038721	Intensity Mean::1000038722	Intensity Mean::1000038723	Intensity Mean::1000038724	Intensity Mean::1000038725	Intensity Mean::1000038726	Intensity Mean::1000038727	Intensity Mean::1000038728	Intensity Mean::1000038729	Intensity Mean::1000038730	Intensity Mean::1000038731	Intensity Mean::1000038732	Intensity Mean::1000038733	Intensity Mean::1000038734	Intensity Mean::1000038735	Intensity Mean::1000038736	Intensity Mean::1000038737	Intensity Mean::1000038738	Intensity Mean::1000038739	Intensity Mean::1000038740	Intensity Mean::1000038741	Intensity Mean::1000038742	Intensity Mean::1000038743	Intensity Mean::1000038744	Intensity Mean::1000038745	Intensity Mean::1000038746	Intensity Mean::1000038747	Intensity Mean::1000038748	Intensity Mean::1000038749
0	266.839	320.436	212.486	235.826	276.394	262.709	246.027	303.189	206.687	295.934	255.655	274.016	217.824	310.72	253.372	317.716	274.61	287.909	279.765	228.812	313.07	312.848	246.944	262.125	293.353	329.437	308.36	347.068	277.342	343.391	304.121	297.842	324.898	314.776	315.702	354.399	339.318	286.805	367.085	336.811	275.193	330.153	341.163	337.345	328.691	283.06	380.209	343.448	243.289
10.458	270.643	323.947	216.976	238.319	278.013	263.833	250.712	305.413	211.342	298.045	258.357	275.05	218.078	309.233	254.301	324.146	278.917	283.8	285.689	229.824	316.592	317.327	246.184	264.629	299.163	333.587	312.819	346.536	277.11	342.958	304.347	294.757	325.479	316.14	316.021	357.784	343.756	286.871	372.399	338.54	277.527	329.649	340.257	340.724	328.577	284.263	380.972	351.459	246.232
20.826	269.398	320.163	212.278	235.795	278.363	265.463	247.551	306.413	212.8	296.595	254.907	274.465	215.459	309.901	253.607	320.651	274.976	286.967	281.78	227.241	315.553	312.836	246.088	263.542	294.843	332.642	307.569	346.499	279.57	344.161	301.472	294.246	321.947	313.582	313.792	351.534	342.583	281.278	368.435	336.579	277.031	330.229	342.481	342.885	330.263	281.268	377.396	348.799	244.931
31.282	270.674	320.558	214.248	239.181	276.105	261.146	246.279	306.157	212.117	296.921	255.412	275.504	214.771	308.473	253.149	323.4	278.71	286.272	280.932	227.31	314.333	315.581	242.689	262.776	290.27	332.12	310.854	347.798	275.961	344.002	304.884	291.334	327.219	316.523	314.334	352.978	345.025	282.724	370.561	338.834	275.004	331.747	341.13	339.484	325.642	280.983	378.644	343.421	246.351
41.489	269.298	321.485	215.866	237.826	275.838	264.635	244.952	306.462	209.573	297.646	255.598	273.68	216.748	311.443	252.512	322.513	277.008	284.461	280.918	233.981	315.519	315.739	243.404	260.657	291.264	330.697	310.213	348.448	274.977	346.904	305.046	295.585	328.101	312.379	315.182	352.493	342.479	282.772	364.77	341.567	275.309	332.481	337.74	340.722	325.286	280.524	381.84	351.582	245.427
52.423	272.011	322.941	217.5	235.163	278.753	263.983	247.943	309.718	210.581	299.355	256.248	277.893	217.209	310.162	254.829	320.621	278.046	287.721	282.524	230.371	316.861	314.013	244.886	262.226	294.103	332.706	313.098	348.319	277.443	344.477	304.596	297.04	327.601	313.4	317.597	348.212	343.935	281.613	370.612	344.541	273.242	335.943	344.313	341.9	327.795	281.202	383.019	349.014	247.756
62.308	273.936	323.203	217.364	237.995	276.228	265.79	245.946	308.971	211.852	300.44	261.88	277.398	218.265	308.78	250.368	323.748	279.774	286.655	283.766	234.074	315.003	314.76	247.865	264.756	297.266	333.483	314.623	350.827	276.356	343.269	305.448	296.283	327.733	312.385	319.405	349.183	345.113	277.435	369.121	343.196	277.713	331.567	342.505	341.603	327.979	282.544	382.294	351.451	248.4
73.367	273.726	320.652	217.734	236.964	276.582	264.775	245.321	304.496	215.285	299.969	257.647	279.376	216.927	306.217	251.499	320.625	281.882	286.349	281.709	233.224	314.524	314.967	249.808	264.026	296.484	333.075	309.764	349.091	275.195	342.732	306.272	290.062	324.173	313.301	320.371	349.15	340.466	279.719	366.132	344.319	276.451	333.846	340.118	342.377	327.822	276.004	379.929	349.833	246.727
83.667	271.916	321.723	214.559	236.571	277.481	261.241	248.267	305.877	215.076	298.89	257.244	279.635	218.582	310.967	254.041	321.688	280.242	286.725	283.453	230.73	313.66	316.003	242.404	264.067	294.779	335.365	308.182	349.648	274.678	346.775	305.761	293.092	326.081	314.627	320.897	351.418	340.942	277.682	363.202	343.792	275.48	330.433	343.452	342.453	327.934	279.787	381.721	344.063	245.684
93.744	273.641	325.534	217.797	238.641	276.275	264.983	246.704	303.046	217.479	304.229	254.973	277.376	216.193	308.46	253.463	325.282	280.552	288.046	282.443	233.417	315.632	311.93	249.196	261.126	289.589	334.873	312.079	349.835	274.883	344.809	307.742	292.934	328.152	311.759	316.338	351.628	339.291	278.102	365.647	346.047	273.605	328.196	340.566	341.34	326.776	280.449	381.854	348.108	248.012
103.588	274.763	318.666	214.416	236.893	275.641	265.655	245.662	306.306	214.963	303.125	257.887	275.996	220.117	309.43	253.154	324.879	282.407	287.252	282.894	230.143	313.965	313.884	247.436	261.23	294.741	334.946	311.423	353.068	273.175	345.791	301.297	291.137	327.289	312.555	316.706	353.16	342.912	276.365	363.441	345.037	274.438	324.554	339.796	339.37	326.402	278.325	381.504	351.094	245.955
114.301	271.578	316.652	209	236.839	274.693	261.865	248.549	305.283	215.201	299.484	260.214	277.224	221.156	307.716	254.693	318.348	280.8	285.482	283.893	230.163	315.53	315.672	248.24	262.292	292.346	335.315	314.498	348.916	272.422	341.194	301.477	290.932	325.781	312.115	318.3	351.283	344.008	274.051	365.668	348.156	275.129	321.809	341.127	341.952	325.787	279.905	382.084	347.705	247.045
124.434	273.064	320.692	213.767	238.982	275.476	261.19	247.704	305.26	215.755	300.464	257.788	279.688	219.395	310.237	253.878	322.755	281.978	287.911	281.931	229.497	316.589	315.603	247.058	263.949	292.963	334.495	311.498	349.214	273.331	341.336	304.704	289.79	321.638	312.931	319.199	349.693	344.13	274.309	366.284	347.443	275.116	323.581	337.99	341.575	325.429	276.174	377.167	349.877	245.365
134.356	272.038	320.74	215.336	238.097	271.815	263.207	244.037	305.303	215.644	300.935	260.85	277.372	222.348	305.021	249.942	320.28	279.72	288.072	282.723	227.786	312.547	314.171	242.371	258.388	292.027	337.705	309.332	347	273.17	340.266	305.2	287.051	323.617	310.979	319.241	348.721	340.17	275.763	365.318	350.657	271.121	320.231	337.471	338.174	326.356	281.216	382.984	349.883	244.607
144.492	274.695	316.6	215.432	234.7	272.223	264.247	243.626	305.003	214.537	301.154	259.547	278.471	223.79	304.817	250.501	323.06	282.419	287.27	282.777	230.868	314.84	315.781	244.916	262.556	295.289	336.43	312.484	349.865	276.483	341.859	304.599	289.259	327.492	309.405	316.758	349.914	339.892	273.519	365.264	351.211	272.433	319.391	336.936	339.563	324.038	278.916	382.467	349.92	245.277
155.378	271.676	320.213	214.486	235.293	274.69	264.138	245.347	304.288	215.224	298.597	259.302	279.045	225.909	305.057	250.737	325.048	281.859	286.105	281.342	230.729	314.916	318.051	246.907	261.121	292.996	336.14	315.255	348.15	272.609	341.696	306.583	285.27	324.017	310.977	316.174	349.433	342.425	271.864	365.513	344.745	274.285	315.329	336.324	338.368	326.96	277.353	378.488	347.884	246.497
165.763	274.265	319.012	216.925	236.918	272.061	264.915	246.249	305.785	218.223	301.017	260.253	277.437	222.948	302.278	250.047	324.531	281.308	289.248	281.971	230.069	315.035	313.81	247.231	260.329	292.249	336.972	310.717	347.776	275.168	340.075	308.39	289.575	326.341	309.359	319.016	348.919	343.04	269.284	365.444	353.935	273.731	316.198	337.605	338.565	326.857	274.707	383.841	351.352	246.738
176.421	275.628	316.716	218.474	234.959	276.578	263.849	246.173	301.572	214.03	298.636	260.977	278.558	226.498	305.809	252.441	321.146	279.245	286.533	285.347	233.95	314.713	317.218	250.046	260.61	292.851	337.686	310.208	347.135	272.203	342.797	305.719	285.388	325.341	312.357	319.146	347.847	337.335	268.012	365.63	355.985	273.218	312.027	337.277	336.902	324.181	279.162	383.937	350.659	245.148
187.357	276.105	319.925	217.686	236.422	275.07	263.072	244.59	305.391	215.882	299.767	259.268	279.188	229.069	305.817	251.769	322.635	285.85	287.44	284.158	230.27	315.021	315.051	250.313	260.284	291.106	336.942	310.099	345.085	273.146	341.568	301.916	285.079	322.44	307.784	316.844	348.391	341.084	267.967	368.411	359.8	275.178	309.76	337.131	336.1	325	275.183	380.076	351.759	244.701
197.891	277.078	322.268	220.149	237.748	274.566	266.064	246.796	305.421	218.386	299.399	260.192	279.095	230.776	304.544	252.997	323.379	281.457	289.262	285.414	232.605	315.762	314.566	253.292	259.003	293.701	339.361	313.563	350.813	275.403	341.441	308.123	285.226	322.865	308.444	319.685	345.805	339.258	267.258	365.201	358.636	276.406	310.105	338.981	333.723	324.472	280.897	381.762	348.92	246.887
208.361	277.326	321.698	220.597	235.986	273.085	259.516	244.05	305.573	218.125	300.229	258.913	277.728	232.118	305.574	253.445	324.256	282.608	288.013	283.945	234.48	317.065	314.611	254.055	259.78	291.632	339.406	310.421	346.461	274.487	341.35	306.38	286.232	323.957	308.104	318.616	349.647	339.343	266.462	363.792	359.147	277.084	310.347	334.175	334.272	325.474	278.066	379.094	347.594	245.972
218.833	275.654	319.28	220.071	237.207	277.773	265.87	244.931	308.347	218.78	302.993	264.863	278.515	229.429	304.426	252.367	324.645	283.46	287.686	285.055	235.397	313.188	314.051	251.759	260.611	291.16	339.586	309.06	349.05	274.127	339.165	304.668	284.513	322.848	307.85	316.427	352.297	339.328	269.201	364.05	362.223	272.717	308.049	338.149	332.584	324.92	280.96	382.07	352.747	248.078
229.321	275.225	316.307	218.217	236.422	277.186	262.126	246.282	305.451	218.374	300.639	262.077	277.222	233.929	304.881	251.418	319.927	282.783	288.751	282.816	235.201	314.234	312.663	253.716	259.884	289.712	338.506	312.976	347.968	275.069	341.586	306.142	286.677	323.111	309.324	319.246	346.738	340.73	265.578	370.725	361.8	274.174	306.829	335.601	337.052	324.343	279.403	383.227	350.468	246.691
239.9	277.056	321.827	220.418	237.491	274.949	260.581	246.009	305.151	221.157	304.446	263.337	276.529	234.855	303.294	251.666	320.677	282.673	289.075	287.556	232.732	315.406	314.041	254.229	261.844	291.508	340.622	312.123	347.503	274.726	339.423	307.779	287.067	322.836	311.009	320.016	346.364	343.323	266.405	365.258	363.54	274.035	305.196	335.205	331.171	322.963	280.624	379.845	351.779	246.278
250.521	278.42	320.065	219.823	241.045	274.435	263.525	244.175	306.16	219.91	303.874	264.183	279.561	235.468	303.205	249.967	325.175	285	290.19	285.689	235.977	313.369	316.78	249.364	260.109	289.922	340.866	315.694	347.389	274.497	340.616	308.705	284.722	325.173	310.077	320.085	346.203	342.616	264.35	365.612	365.12	272.774	303.398	337.489	337.99	326.638	279.25	378.484	355.54	247.53
260.889	274.67	320.229	214.664	239.568	275.793	262.989	244.982	305.605	220.006	304.539	260.881	279.92	238.837	302.62	252.657	324.435	283.458	291.124	284.355	231.839	313.465	313.605	255.975	255.252	291.125	339.121	312.545	348.638	276.748	338.512	308.537	283.913	325.648	305.903	318.032	344.814	340.882	262.189	364.741	362.997	273.753	304.147	335.563	332.959	324.848	277.619	379.912	354.273	247.392
271.258	278.278	319.577	217.985	237.126	275.468	262.357	247.339	306.963	219.233	306.061	265.956	276.755	237.228	303.966	252.14	326.774	283.038	290.906	285.965	232.784	317.214	314.728	256.573	258.505	289.977	340.953	317.542	348.972	276.616	338.206	306.227	283.608	326.125	312.197	318.104	346.273	341.022	266.445	365.467	360.535	272.553	301.325	336.58	332.88	326.413	277.426	375.408	356.024	248.008
281.924	279.178	319.698	217.959	236.709	275.437	260.413	245.071	304.96	216	306.969	262.635	276.813	240.19	301.645	251.173	324.912	282.821	292.502	286.762	232.945	314.83	314.852	258.017	257.802	285.519	341.367	315.91	345.099	276.764	335.248	309.398	282.199	321.718	311.019	316.85	346.364	345.059	262.823	364.942	360.721	271.693	302.434	335.774	330.829	324.926	275.424	378.615	349.901	245.769
292.306	275.91	321.813	218.619	237.799	277.07	261.996	246.131	306.604	221.102	307.896	263.007	276.978	242.494	304.533	250.624	323.258	283.256	289.79	287.527	233.374	316.594	317.189	259.934	258.17	287.125	342.069	315.683	346.967	278.456	335.752	306.018	284.275	322.553	308.608	318.525	347.335	344.673	261.142	364.637	362.456	270.896	300.944	335.233	331.357	323.815	280	380.35	354.845	246.777
303.019	277.257	317.335	220.25	237.19	277.133	261.426	244.698	306.042	220.91	311.238	262.309	278.015	239.221	303.817	252.064	322.685	286.969	290.619	282.083	236.994	315.106	317.027	265.223	254.768	286.729	341.578	315.229	346.003	277.805	337.598	305.784	281.626	323.368	310.528	318.024	345.173	341.223	260.562	363.358	364.663	271.258	297.793	339.905	328.971	328.323	277.882	376.228	355.836	247.671
313.297	280.742	320.932	219.067	236.417	277.068	261.672	244.204	307.452	218.369	308.309	264.195	281.09	240.687	307.171	251.547	323.479	282.434	290.007	286.543	235.454	313.747	312.728	262.048	257.264	288.615	341.858	316.11	348.829	279.616	337.795	306.774	286.917	324.359	311.556	319.011	347.002	341.326	261.357	364.288	366.371	271.977	302.089	333.858	332.662	326.203	280.413	374.896	356.911	246.276
323.573	278.201	319.308	220.865	238.377	277.017	261.989	245.092	306.338	220.306	310.742	261.437	279.324	245.245	302.857	250.928	322.361	286.208	292.897	287.619	235.284	312.907	312.13	263.492	257.351	286.327	341.244	313.46	344.258	276.847	336.971	306.232	281.735	326.309	307.962	317.997	347.027	341.506	259.894	365.5	364.663	269.896	299.185	336.449	332.286	329.164	276.367	376.102	349.561	245.164
333.772	276.509	323.771	217.586	236.068	277.411	261.642	247.674	305.721	220.489	307.541	261.272	276.069	241.738	306.625	250.939	324.93	285.275	291.709	283.676	237.349	313.954	312.833	262.784	257.906	288.631	342.51	316.045	347.11	279.202	334.534	308.754	286.036	324.264	311.754	318.931	342.391	344.023	258.103	362.426	365.54	273.577	299.085	334.92	333.135	325.898	276.721	378.231	355.692	247.127
344.518	277.813	321.268	219.321	235.186	274.905	259.594	245.29	307.318	218.5	311.771	262.413	280.757	243.105	305.159	250.543	321.915	283.669	291.013	283.542	234.771	315.003	313.068	265.104	256.361	286.567	343.355	314.014	344.102	280.708	337.547	307.132	283.527	326.284	309.623	318.611	344.469	344.364	255.98	364.825	366.249	273.429	297.279	335.459	333.52	326.655	279.964	376.118	351.266	244.944
355.11	276.788	321.472	220.473	235.355	279.208	260.448	243.681	306.997	223.547	308.449	260.547	277.13	244.163	305.101	251.949	324.481	284.278	289.326	285.946	234.404	313.542	309.439	263.328	255.93	285.354	342.201	313.436	345.99	281.453	338.123	310.744	283.599	321.174	310.1	318.146	342.609	344.828	254.093	361.749	367.591	273.105	293.164	335.266	332.302	324.355	278.817		351.27	247.205
365.385	278.57	320.791	218.811	237.749	276.493	260.178	241.518	305.541	220.155	314.7	262.3	277.426	243.761	299.969	249.061	323.371	284.728	287.961	283.87	237.971	312.153	308.911	268.698	254.285	282.004	340.683	309.433	346.725	282.075	336.39	308.33	283.699	322.246	309.616	316.665	343.966	343.978	248.229	360.533	364.155	273.895	293.712	337.898	331.205	323.828	276.486		347.724	244.543
376.213	275.869	321.979	217.111	238.213	275.724	260.081	244.239	307.243	223.556	308.476	259.612	279.214	245.852	301.572	249.733	320.646	282.755	292.705	284.641	236.397	312.259	309.718	268.198	258.934	290.034	341.97	309.395	343.613	280.668	333.65	307.872	280.755	322.364	308.089	320.57	342.311	341.701	243.072	357.444	362.589	273.247	289.136	336.104	331.112	327.308	275.78		350.409	245.062
386.747	280.502	322.769	215.141	236.136	277.884	257.463	243.124	306.501	219.401	311.12	260.169	280.451	247.255	302.859	249.398	322.395	283.18	293.377	283.081	235.349	312.393	309.379	262.904	254.366	287.512	341.998	313.635	347.884	282.799	335.618	303.767	281.174	326.15	311.328	319.343	344.585	345.729	241.883	360.437	367.443	270.167	291.381	336.497	330.748	325.539	275.713		353.02	245.265
397.299	281.183	322.873	220.543	238.027	277.682	258.669	243.627	306.825	221.682	309.872	263.301	277.466	246.43	299.097	252.436	324.433	284.81	290.649	285.707	234.485	314.512	309.336	268.621	256.047	286.798	341.563	310.72	339.381	281.755	333.631	302.829	280.813	323.98	308.035	321.491	342.845	341.401	242.603	356.762	367.374	273.371	290.102	332.937	328.077	326.4	276.767		350.886	246.333
407.217	278.243	321.339	220.154	235.311	281.03	260.196	244.629	306.047	220.478	311.301	262.301	281.402	250.795	299.354	250.57	317.948	281.973	291.266	283.484	235.407	311.438	309.513	268.373	256.082	281.465	342.762	312.759	344.217	285.734	336.632	307.517	281.98	321.96	309.63	317.158	343.831	339.444	236.468	359.891	367.285	272.276	290.168	336.151	331.861	322.231	278.085		350.261	244.57
417.598	278.844	322.617	217.962	236.144	275.959	261.372	242.856	308.429	219.621	313.997	260.592	280.195	248.323	299.66	247.53	318.677	282.386	291.055	282.766	234.11	313.043	309.605	266.127	255.08	281.808	339.961	311.151	344.928	283.853	335.214	305.196	283.314	325.109	310.128	315.378	339.714	342.353	231.29	361.732	367.975	270.957	289.7	335.717	329.432	325.038	274.748		353.247	245.39
427.668	278.096	322.681	217.651	233.664	273.422	259.88	243.085	306.726	218.809	311.794	262.03	277.19	247.083	298.819	246.061	319.408	281.595	292.325	283.923	234.667	312.181	306.918	269.803	253.96	284.475	340.086	306.739	341.225	288.269	335.414	303.821	281.773	321.288	309.567	316.414	341.42	344.147	229.68	360.686	365.975	271.201	290.57	333.798	331.109	326.15	275.69		352.912	243.835
437.709	278.971	322.441	220.412	238.157	275.144	258.374	244.009	307.188	220.971	311.551	258.977	277.146	247.79	297.225	245.356	321.568	283.717	291.834	281.526	231.821	313.716	309.729	267.638	256.28	285.469	339.734	308.473	342.87	281.786	329.89	303.743	279.536	320.492	308.624	316.708	340.646	341.902	224.561	356.313	365.741	273.858	285.424	333.905	328.523	326.204	276.485		350.779	245.282
447.905	276.385	321.938	220.77	237.118	275.838	259.411	242.676	310.138	221.449	311.624	260.119	276.687	248.867	297.179	250.026	316.842	282.34	294.019	281.769	233.782	310.202	307.466	270.906	252.422	282.457	336.689	310.186	344.281	282.95	332.338	307.069	278.566	323.977	309.504	316.126	338.97	340.283	220.917	358.405	370.033	271.832	288.366	335.516	329.216	325.506	277.66		349.773	245.205
458.184	282.402	322.702	220.768	238.179	276.198	257.077	242.74	306.332	217.277	308.901	258.63	278.236	249.146	295.3	247.127	319.842	280.595	292.814	280.721	233.062	314.033	306.774	271.797	253.728	281.961		310.457	340.995	285.463	332.967	306.151	278.502	320.477	305.287	314.771	340.343	340.18	222.016	358.638	365.537	271.415	281.303	332.508	327.255	323.043	273.423		345.224	245.408
468.342	276.755	323.389	220.015	235.058	274.229	257.956	240.692	306.902	217.749	311.49	260.004	276.163	250.138	297.187	247.575	316.789	281.796	296.109	282.592	234.04	310.609	307.89	269.278	252.383	282.261		310.989	343.841	283.35	334.801	306.108	278.57	321.784	305.272	314.288	343.277	342.743	219.341	358.208	368.41	271.532	274.198	335.168	329.369	324.802	273.422		349.742	245.687
478.863	276.545	323.946	220.965	237.324	275.471	257.428	241.277	307.573	220.718	311.701	257.67	278.315	250.153	297.827	245.305	319.481	279.573	296.551	281.253	233.598	310.563	307.557	274.765	254.946	282.943		305.176	342.949	285.864	333.744	304.418	281.649	322.737	305.31	312.447	338.295	338.366	212.653	357.561	366.512	271.064	266.834	331.659	330.027	324.26	274.992		348.502	243.723
489.556	277.345	319.624	219.508	235.413	276.007	260.333	241.176	307.913	219.235	311.595	260.622	276.43	251.149	295.445	246.451	315.59	280.294	295.424	282.89	235.438	311.771	304.378	275.183	253.785	282.402		309.079	340.967	285.47	330.119	304.911	279.868	318.546	306.077	312.642	337.986	336.305	202.663	357.621	366.271	274.375	262.29	329.766	330.374	324.455	274.461		349.43	246.507
500.42	280.478	324.721	223.876	234.991	278.766	258.123	240.404	307.779	222.579	312.218	259.84	278.847	253.311	294.774	246.623	315.332	284.077	291.871	281.206	235.824	310.495	307.082	271.567	252.179	282.609		309.625	344.839	286.167	333.714	305.506	276.111	322.424	307.679	313.753	340.232	336.729		360.049	367.474	274.347	258.209	331.904	329.471	325.939	272.788		348.47	244.929
510.864	277.422	321.225	224.322	236.517	277.14	255.9	244.436	306.471	219.214	311.727	258.677	274.984	254.199	293.205	244.853	313.227	277.042	294.338	281.748	233.567	310.144	304.422	266.68	253.845	278.844		306.223	338.811	287.427	334.221	302.431	278.29	315.441	305.108	313.084	337.251	332.661		358.113	366.46	272.885	246.342	327.728	329.971	323.783	272.58		347.199	245.431
521.638	280.119	318	222.714	233.449	275.417	258.245	243.217	303.889	220.238	312.88	256.197	275.012	256.112	294.607	243.865	312.251	280.663	291.193	281.984	234.907	306.805	306.281	268.879	255.538	281.122		306.365	340.797	285.506	329.092	304.519	275.29	320.254	302.224	310.079	337.516	333.907		354.156	366.802	271.237	235.624	329.217	326.842	324.111	272.215		345.953	245.454
531.742	277.978	323.35	220.538	233.882	275.873	256.713	239.286	302.604	218.04	310.751	254.838	273.039	251.182	297.264	244.125	315.167	280.631	294.142	280.406	229.893	307.566	307.055	272.977	253.081	281.469		308.77	337.665	285.827	330.962	301.531	276.219	316.226	306.451	311.31	338.105	337.077		359.451	367.046	269.867	227.905	332.127	329.234	323.934	271.451		346.227	244.787
541.796	278.437	325.19	223.022	234.12	277.054	258.437	241.604	306.085	220.011	313.186	255.993	276.76	254.912	291.577	244.963	313.353	281.429	291.673	282.926	233.531	311.962	308.758	272.138	254.416	282.538		302.829	340.82	285.873	328.012	303.333	275.475	313.426	304.156	308.568	335.785	337.062		362.516	371.129	269.698	223.275	332.484	325.422	322.341	268.329		345.855	244.489
551.79	278.302	324.579	221.761	235.479	275.762	258.668	239.507	306.576	221.514	314.9	256.584	275.537	254.007	296.106	245.071	316.48	279.463	291.425	282.926	230.882	309.526	306.301	276.481	252.98	280.897		307.33	337.883	285.806	330.262	303.693	276.01	317.535	303.736	312.514	339.552	336.11		359.824	369.698	271.758	220.959	328.335	326.346	322.123	270.195		349.559	244.993
561.91	279.96	323.652	220.297	237.102	277.172	257.342	238.256	304.844	218.932	315.054	257.943	275.519	252.9	292.951	244.631	315.527	279.788	292.794	283.538	233.106	306.061	306.616	274.611	254.773	281.854		305.823	337.801	289.565	326.121	300.592	274.695	316.353	302.116	311.531	334.339	341.089		360.583	370.331	273.044	219.719	330.152	328.714	322.156	272.219		348.418	243.468
572.308	275.39	324.512	221.183	235.009	280.024	256.712	240.33	306.053	220.386	312.764	256.725	277.092	256.902	292.744	245.265	318.043	277.716	290.426	283.465	232.94	306.497	307.114	273.557	255.133	278.734		307.025	339.08	288.645	329.275	303.967	274.454	318.593	301.461	310.973	335.235	338.674		357.3	367.494	272.628		331.869	327.143	322.093	269.892		349.167	244.81
582.399	278.074	327.238	220.965	234.849	278.588	256.445	238.795	307.453	216.035	314.333	256.21	275.179	255.139	293.97	243.284	315.819	281.169	288.363	279.31	234.042	307.639	302.282	274.275	253.933	285.624		306.254	341.634	288.033	330.013	303.423	275.21	316.889	302.022	312.822	335.536	339.538		358.859	370.843	271.282		330.127	326.681	325.652	270.443		350.47	243.342
592.864	274.919	325.696	222.098	233.995	277.081	259.431	238.33	305.432	220.276	312.827	258.55	274.047	253.084	294.365	244.109	315.296	280.155	291.106	284.143	230.787	306.547	307.446	275.877	252.615	282.763		305.129	336.509	288.627	331.437	304.366	276.057	318.868	302.85	309.665	335.165	337.636		358.925	370.69	272.398		333.36	326.93	324.811	271.399		346.151	245.553
603.169	278.564	325.127	224.21	234.546	277.9	257.869	239.05	304.451	221.407	312.598	258.66	274.502	256.855	292.344	244.817	316.617	280.927	289.151	280.912	232.366	309.785	306.365	276.305	255.04	281.73		303.978	339.381	288.728	330.644	303.495	274.313	319.55	303.723	309.721	333.721	335.116		358.851	365.183	269.02		331.235	322.672	324.145	270.562		344.329	244.186
613.726	278.194	327.295	216.667	234.531	277.796	259.078	238.292	303.458	219.322	311.672	257.031	275.494	255.255	294.156	245.767	317.673	279.533	292.22	281.903	230.407	306.445	306.345	277.707	254.169	280.637		305.61	337.917	286.425	331.204	304.267	277.807	316.113	301.863	310.642	333.354	336.049		358.033	367.491	270.784		330.935	329.654	325.77	269.167		344.462	245.073
623.833	276.403	322.908	220.78	236.019	280.303	259.302	241.083	303.313	221.285	310.544	255.781	274.706	254.504	294.91	245.846	311.778	281.184	289.783	282.261	232.835	307.033	303.31	276.721	256.044	280.597		304.799	339.579	285.586	324.604	303.924	277.818	316.45	302.531	308.865	334.717	338.843		359.461	370.105	271.276		332.516	325.543	323.05	272.281		346.297	244.299
634.566	277.15	327.465	223.935	233.876	281.812	258.953	234.94	304.413	222.866	311.59	256.149	275.502	256.795	287.962	243.085	316.464	281.599	290.036	283.331	234.426	308.508	307.344	274.374	254.593	280.793		304.13	339.326	286.77	328.336	304.214	274.716	315.178	302.282	309.923	333.88	335.24		357.876	371.798	272.98		328.457	326.431	322.567	270.459		347.103	242.503
644.938	279.872	328.35	224.755	234.536	285.659	255.711	238.985	302.626	221.831	311.142	256.055	273.637	253.258	292.345	243.267	315.645	278.784	292.78	284.718	230.733	306.901	304.385	276.55	253.054	282.123		305.96	335.684	284.794	327.198	298.341	274.47	318.033	298.961	307.467	331.722	334.392		355.914	371.202	269.35		333.379	327.181	324.459	269.996		346.946	242.77
655.573	279.401	330.763	220.94	233.957	284.139	258.395	237.015	303.133	223.205	306.997	253.444	274.131	257.257	291.821	244.05	313.304	280.918	291.515	284.446	233.902	306.681	304.154	275.592	251.113	280.039		304.889	338.725	287.503	328.613	299.877	276.357	314.139	299.724	305.583	333.615	330.652		352.918	370.161	272.319		332.231	322.954	321.456	268.522		344.896	243.149
666.299	279.292	329.211	219.52	235.729	289.877	256.901	240.898	304.106	221.294	311.912	254.532	276.024	256.188	289.782	242.251	314.488	282.012	291.593	281.182	228.913	308.2	306.632	276.618	253.059	281.221		306.011	340.192	290.304	328.346	304.031	276.626	315.652	299.551	309.649	334.601	332.654		358.556	372.976	270.444		336.044	327.055	321.833	269.732		349.622	245.786
677.036	278.971	329.041	220.18	235.591	288.197	258.3	240.113	301.76	219.034	308.354	253.275	275.364	256.446	290.271	240.748	313.531	280.712	288.689	282.637	236.006	308.008	304.844	277.008	247.329	280.664		307.76	335.517	287.885	326.01	299.506	274.435	314.934	302.02	309.531	332.695	336.234		356.181	371.114	274.24		333.083	326.355	323.249	268.278		345.091	243.51
687.156	280.744	330.015	220.272	232.604	292.823	258.726	238.28	303.224	222.865	309.685	255.411	273.308	258.149	290.006	242.235	314.187	280.838	289.372	281.136	233.905	307.331	301.877	274.346	248.861	277.561		304.993	336.933	287.266	325.563	303.757	274.88	316.854	298.672	306.435	332.568	333.503		352.695	372.188	268.701		333.877	326.819	324.333	269.538		347.101	244.313
697.53	277.813	330.571	221.442	234.28	291.994	256.13	239.682	305.262	222.59	311.398	255.408	271.165	259.331	289.399	243.625	314.015	280.833	289.94	283.454	231.154	309.961	306.622	277.677	245.659	279.132		304.552	336.497	288.691	324.884	299.591	274.119	314.64	300.548	311.283	329.875	328.435		355.124	370.268	270.992		334.25	331.149	322.519	267.159		347.66	242.683
707.733	277.295	329.2	225.483	235.771	296.891	257.39	238.066	302.457	220.557	311.787	257.709	275.024	257.762	290.295	242.768	315.704	282.533	287.313	283.778	230.939	306.398	307.709	279.402	250.632	281.992		304.327	334.91	287.329	327.688	303.324	272.775	313.98	299.086	307.566	331.005	332.479		356.332	369.243	267.405		334.523	325.142	325.154	266.55		345.329	244.01
717.901	280.13	332.749	223.866	234.831	298.436	257.21	241	304.816	222.186	317.452	258.202	272.576	259.01	289.616	240.491	316.34	280.349	288.826	281.718	234.419	309.476	306.014	274.954	246.49	278.303		304.791	335.335	287.825	324.884	301.191	276.369	314.395	298.055	308.843	333.773	331.779		354.294	373.622	269.737		337.585	326.345	323.342	268.695		346.858	244.362
728.674	278.685	335.722	223.545	231.995	299.06	255.943	239.353	302.604	220.191	315.265	255.08	271.372	259.324	290.854	241.282	314.507	279.558	287.752	280.75	233.461	309.691	305.576	273.462	247.5	281.736		304.989	332.945	283.297	325.113	301.801	274.616	318.406	300.237	308.902	329.525	334.846		355.984	372.661	267.733		335.106	326.899	323.21	270.972		345.854	245.409
739.67	280.254	335.17	221.429	234.449	298.399	255.431	238.415	300.099	219.722	311.292	254.067	268.953	258.975	288.42	240.465	315.319	279.765	288.211	284.65	232.904	309.192	309.116	279.248	245.818	283.758		304.129	334.5	286.287	326.367	298.342	274.676	315.279	298.403	307.12	330.86	333.405		350.644	370.886	270.849		336.26	328.207	323.159	270.85		348.405	243.244
750.279	277.569	336.108	221.773	232.805	298.313	254.322	238.132	300.944	222.489	308.781	256.082	268.592	258.263	290.317	240.06	311.515	277.619	286.891	281.745	229.358	309.19	302.608	278.609	246.903	279.853		305.28	334.868	287.673	324.703	300.335	274.164	312.466	298.942	308.848	327.462	333.668		352.645	374.287	270.176		336.509	328.668	323.045	269.296		348.264	244.75
760.55	277.187	334.932	222.478	231.519	300.117	256.13	240.078	302.906	221.872	310.412	256.514	270.98	260.119	287.315	240.28	312.37	282.008	290.405	279.927	232.16	306.51	306.565	278.431	243.507	282.508		305.719	331.558	287.521	326.307	298.501	273.566	315.242	296.516	308.699	327.46	335.045		354.209	371.799	266.811		338.388	325.774	320.454	264.885		345.799	243.791
770.889	278.441	335.458	222.496	234.285	301.189	255.293	236.088	305.886	221.625	307.918	255.102	268.355	258.755	289.596	240.22	312.21	280.016	291.735	279.485	232.241	306.735	300.534	282.723	243.454	281.906		304.303	335.977	286.988	323.869	300.83	273.778	315.066	300.087	306.054	328.324	336.721		352.268	374.243	270.967		337.291	330.112	323.256	268.809		342.268	243.897
780.963	278.673	336.291	225.664	230.956	300.511	257.117	238.166	303.47	222.115	306.567	251.953	271.72	258.763	289.069	242.498	309.481	277.466	292.678	280.213	232.444	307.249	306.566	277.854	242.802	282.278		301.094	332.356	286.628	325.356	300.379	272.486	314.793	298.568	305.281	329.738	338.601		352.51	373.125	270.733		336.235	330.933	322.99	267.864		349.051	241.841
791.26	278.647	338.922	222.917	232.737	301.256	255.578	237.146	303.41	221.38	306.446	253.099	271.813	260.295	288.381	240.926	313.503	281.919	291.353	281.19	232.11	308.211	301.077	277.902	242.888	279.012		300.427	334.881	289.101	323.801	298.236	274.773	312.976	297.722	304.997	327.691	342.453		350.77	372.033	267.988		335.573	332.247	324.512	264.778		344.51	242.362
801.34	278.427	337.962	224.493	235.338	302.071	255.196	238.427	304.902	221.044	305.605	251.992	273.128	261.056	288.674	238.888	313.772	276.996	291.023	279.07	234.543	306.039	304.202	280.706	240.265	278.826		305.082	332.501	287.491	322.77	302.061	274.552	317.666	296.26	304.616	331.169	340.615		350.443	371.108	269.607		337.359	329.063	322.389	265.514		346.398	242.594
811.276	275.178	340.419	222.978	234.563	303.467	256.319	236.705	303.281	218.058	308.538	252.506	268.754	260.292	288.706	240.099	313.965	278.945	292.184	277.966	233.971	307.199	304.955	278.879	242.903	281.178		303.581	333.674	287.374	326.2	301.841	273.488	314.686	297.847	305.915	329.053	340.139		350.196	371.048	269.075		334.453	330.827	321.679	267.516		347.583	243.197
821.7	278.248	341.009	222.852	234.137	304.912	255.845	239.379	306.24	222.22	308.99	256.02	274.371	258.944	287.207	240.403	315.211	281.371	290.804	283.205	234.906	308.368	302.476	285.412	242.773	282.378		304.5	331.052	287.349	325.097	301.813	274.443	316.595	297.549	307.576	326.019	340.669		349.139	375.472	269.504		337.528	329.29	325.259	267.012		347.586	246.218
832.135	279.615	339.391	219.793	236.732	303.959	256.466	240.041	306.604	219.961	309.895	256.534	273.811	261.857	287.668	239.627	312.106	277.558	289.34	280.993	233.094	308.146	302.955	287.832	240.27	280.367		303.545	334.366	290.497	325.893	300.441	272.042	317.97	295.499	305.022	328.022	340.481		349.411	372.821	267.504		337.126	328.85	321.11	269.805		347.435	243.084
842.587	277.818	342.043	223.56	231.67	305.966	256.705	242.451	305.079	221.292	312.562	255.275	271.633	261.156	288.261	238.038	311.716	280.378	289.904	279.507	234.788	306.084	303.669	284.687	240.524	280.469		305.097	333.044	287.952	324.054	298.9	271.254	319.898	296.674	307.871	329.175	341.904		344.767	371.387	268.351		335.104	327.518	324.296	268.931		346.903	244.042
853.404	275.435	345	224.212	238.916	305.924	254.881	236.269	307.291	219.705	310.309	256.203	272.097	260.214	288.012	239.757	313.211	279.773	292.404	280.337	232.768	306.848	300.466	286.473	240.498	277.773		305.668	333.564	287.809	325.688	302.566	272.615	316.133	297.573	305.934	327.317	337.517		349.043	373.651	269.539		334.823	327.128	324.459	266.972		348.366	242.786
864.149	276.993	343.183	225.567	237.216	307.899	253.336	236.99	308.636	222.232	315.233	252.393	271.418	262.639	287.503	238.542	312.331	279.17	290.743	280.043	236.919	307.896	303.045	288.202	238.912	281.891		303.232	335.452	289.164	325.003	301.771	273.489	319.711	296.213	307.417	328.964	338.542		343.85	371.764	269.442		336.917	327.117	322.887			346.337	243.344
874.849	278.398	348.853	224.943	234.186	309.769	255.851	242.563	307.273	222.303	316.181	253.097	271.841	262.567	286.597	238.612	314.009	282.939	291.645	279.463	236.653	308.787	304.969	287.961	240.642	284.6		304.386	333.468	291.764	323.4	299.188	273.149	314.046	296.068	306.098	326.99	338.951		345.565	369.68	269.62		335.584	324.616	324.273			348.097	242.563
[truncated: 180 more columns]
