# Supplementary material for: Sustained store-operated calcium entry utilizing activated chromatin state leads to instability in iTregs
Source: eLife. 2023 Dec 6;12:RP88874. doi: 10.7554/eLife.88874 (PMC10699804; doi:10.7554/eLife.88874)
Supplement: Figure 1—source data 1. [file elife-88874-fig1-data1.xlsx]

## Sheet: Fig 1A
w/o Treg	iTreg 1:1	tTreg 1:1	iTreg 1:2	tTreg 1:2	iTreg 1:4	tTreg 1:4
78.4	45.3	72.9	63.3	63.7	70.4	67.8
77.2	44.3	73.8	61.7	68.3	67.1	66.3
77.9	44.9	74.6	63.1	71.8	68.5	62.1
75.5
76.5
81

## Sheet: Fig 1B
Adhesion [nN]
Tconv	nTreg	iTreg
0.436	0.691	1.04
0.325	0.592	2.28
0.406	0.592	1.8
0.412	0.517	1.64
0.412	0.576	1.66
0.568	0.59	1.46
0.512	0.596	1.52
0.543	0.613	1.55
0.387	0.632	1.66
0.422	0.617	1.48
0.466	0.598	1.67
0.436	0.655	1.47
0.434	0.594	1.45
0.324	0.6	1.39
0.488	0.575	1.71
0.435	0.62	1.69
0.419	0.525	1.71
0.436	0.553	1.89
0.49	0.551	1.78
0.611	0.584	1.42
0.664	0.62	1.64
0.514	0.776	1.21
0.49	0.731	1.46
0.552	0.734	1.22
0.549	0.706	0.736
0.391	0.809	0.832
0.592	0.838	1.43
0.551	0.924	1.16
0.658	0.851	1.18
0.537	1.04	1.48
0.457	0.782	1.45
0.491	0.807	1.39
0.434	0.655	1.32
0.521	0.805	1.31
0.47	0.783	1.16
0.456	0.664	1.2
0.494	0.579	1.22
0.488	0.554	1.19
0.505	0.58	1.26
0.427	0.742	1.24
0.457	0.613	1.05
0.476	0.592	1.04
0.378	0.629	1.24
0.317	0.553	1.02
0.368	0.744	0.934
0.424	0.559	1.13
0.338	0.592	1.31
0.539	0.549	0.689
0.623	0.646
0.462	0.537
0.408	0.741
0.415	0.733
0.342	0.647
0.367	0.621
0.366	0.687
0.4	0.577
0.338	0.549
0.383	0.617
0.462	0.593
0.363	0.654
0.376	0.541
0.347	0.632
0.412	0.782
0.371	0.801
0.386	0.732
0.442	0.733
0.416	0.795
0.404	0.779
0.367	0.752
0.387	0.88
0.414	0.712
0.395	0.698
0.35	0.594
0.325	0.774
0.491	0.719
0.423	0.6
0.359	0.746
0.357	0.743
0.404	0.674
0.312	0.759
0.539	0.651
0.385	0.723
0.365	0.651
0.438	0.599
0.688	0.704
0.629	0.552
0.404	0.679
0.485	0.65
0.387
0.381
0.439
0.421
0.442
0.439
0.404
0.406
0.365
0.491
0.565
0.455
0.379
0.472
0.406
0.419
0.355
0.486
0.387
0.391
0.404
0.42
0.406
0.484
0.319
0.387

## Sheet: Fig 1C
Adhesion [nN]
Tconv	act Tconv	iTreg
0.558	1.09	1.53
0.649	0.598	1.37
0.893	0.841	1.04
0.701	0.599	1.2
0.661	0.544	1.39
0.74	0.696	0.927
0.656	0.465	1.02
0.745	0.73	0.838
0.778	0.41	1.08
0.642	0.871	0.958
0.628	0.757	1.4
0.756	0.63	0.667
0.835	0.745	0.705
0.611	0.678	0.814
0.586	0.687	0.857
0.64	0.502	0.793
0.867	0.779	1.12
0.594	0.593	1.05
0.625	0.605	1.1
0.725	0.528	1.02
0.805	0.594	1.06
0.801	0.618	1.36
0.478	0.843	1
0.481	0.617	0.994
0.662	0.617	0.915
0.73	0.604	0.986
0.628	0.55	1.03
0.433	0.523	1.11
0.521	0.552	0.904
0.587	0.601	0.952
0.616	0.66	0.812
0.439	0.913	0.927
0.476	0.607	0.955
0.495	0.695	0.813
0.48	0.581	0.795
0.407	0.654	0.871
0.488	0.751	1.11
0.49	0.671	0.977
0.577	0.615	0.86
0.583	0.743	0.938
0.511	0.67	0.796
0.44	0.762	0.988
0.399	0.471	0.846
0.508	0.802	0.89
0.626	0.677	1.04
0.673	0.632	0.811
0.499	0.806	0.861
0.61	0.513	0.825
0.466	0.642	0.933
0.506	1.16	1.09
0.628	1.36	0.951
0.55		0.97
0.684	1.3	0.816
0.711	1.07	1
0.67	1	0.88
0.543	1.41	1.2
0.664	1.31	0.972
0.483	1.24	0.935
0.526	0.532	0.945
	1.24	1.01
	1.11	0.908
	1.05	0.679
		1.03
		0.876
		0.814
		0.921
		0.961
		0.937
		0.933
		0.959
		0.816
		1.24
		1.36
		1
		0.972
		0.98
		0.95
		1.1
		0.88
		1.29
		0.832

## Sheet: Fig 1D
Day 0	0.4
Day 0.5	0.63
Day 1	12
Day 1.5	41.8
Day 2	58.6
Day 3	59

## Sheet: Fig 1E middle
Ratio
0d	1d	2d	3d	4d
0.51124	0.44037	0.45304	0.29747	0.20225

## Sheet: Fig 1E RIght
Amplitutude
0d	1d	2d	3d	4d
1.2202	1.0999	1.0078	1.1025	1.0602
1.2767	1.0041	1.1228	1	1.0234
1.708	1.071	1.0128	1.9686	1.1488
1.2913	1.1266	1	1.014	1.1304
1.3588	1.0195	1.4009	1.4157	1.003
1.3513	1.0208	1.0607	1.0513	1.0412
1.4255	2.3215	1.1769	1.3321	1.182
1.1164	1.1686	1.1016	1.0572	1.0583
1.1497	1.6947	1.2294	1.4166	1
1.0655	1.0032	1.1103	1.0023	1.0926
1.5942	1.0102	1.1901	1.2573	1.1495
1.3047	1.1154	1.4381	1.4143	1.1342
1.8098	1.1247	1.175	1.0098	1.0055
1.4733	1	1.7842	1.0014	1.0624
1.288	1.0668	1.0819	1.0044	1.2082
1.1543	2.1955	1.0432	1.0765	1.5694
1.0514	2.3783	1.0167	1.0343	1.1943
1.3186	1	1.0874	1	1.0483
1.2159	2.4715	1.6616	1.7788	3.3156
1.6777	1.3148	1.0135	1.034	1.1331
1.3442	1.093	1.0479	1	1.1295
1.1757	1.0015	1.0108	1.1989	1.3398
1.118	1.2937	1.6536	1	1.0957
1.2843	1.2467	1.2343	1.336	1
1.6713	1.037	1.6191	1.4689	1.459
1.3812	1.6916	1	1.0265	1.1137
1.1885	1.0293	1.0086	1.395	1.0014
1.414	1.2966	1.3694	1.9918	1.0919
1.4314	1.0628	1.0168	1.1357	1.0063
1.0586	2.2707	1.0064	1.0504	1.4268
1.0203	1.0158	1.3694	1.0113	1.0305
1.3125	2.5606	1.0255	1.0753	1.1253
1	1.0727	1.6097	1.0418	1.0134
1.3546	1.0046	1.1498	1.2408	1.0589
1.2034	1.0958	1	1.1096	1.0758
1.8418	1.0286	1.5477	1.0409	1.0868
1.3177	1.0076	1.0775	1.1058	1.4458
1.1119	1.8036	1.5007	1	1.0087
2.2544	1.0537	1.8027	1.0685	1.5201
1.0521	1.08	1.0014	1.0309	1.3558
1.1611	1.087	1.1806	1.0149	1.0172
1.0336	1.5013	1.0822	1.0121	1.2953
1.5032	1.0326	1.4738	1.2263	1.2154
1.4168	1.0673	1	1.0729	1.3095
1.6014	1.1396	1.8441	1.1159	1.103
1.3732	1.0262	1.8457	1.0372	1
1.1786	1.1266	1.6156	1.0005	1.2201
1.1454	1.0139	1.1435	1.2763	1.0176
1.0911	2.0103	1.9553	1.1634	1.0422
1.2161	1.0162	1.5484	1.0037	1.2425
1.4101	1.2467	1.0434	1.2389	1.0052
1.4346	2.5872	1.4977	1.0962	1.1909
1.0324	1.0293	1.6991	1	1.0217
1.132	1.7504	1.1294	1.0022	1.0041
1.6277	1.4106	1.0537	1.0416	1.2826
1.036	1	1.0049	1.0142	1.0924
1.0982	1.2043	1.0534	1	1.2424
1.0271	1.6925	1.0021	1.4803	1.2436
2.7757	1.1325	1.0631	1	1.132
1.1862	1.5281	1.1623	1.1666	1.0261
1.0121	1.34	1.1752	1.3619	1.0311
1.1221	1.0083	1.0094	1	1.1288
1.7116	2.6482	1.033	1.1247	1.1525
2.2446	1	1.3118	1.0054	1.248
1.2061	1.2966	1.6092	1.017	1.1289
1.3143	1.0194	1.2715	1.1553	1.053
1.0674	1.0936	1.2373	1.138	1.0119
1.4793	1.0319	1.0698	1.3365	1.0081
1.4742	1.291	1.3667	1.0028	1
2.5025	1.5504	1.7147	1	1.0022
1.5921	1.141	1.0486	1.27	1
1.3534	1.0098	1.0828	1.0087	1.2375
1.5068	1.0492	1.2353	1.1253	1
1.4346	1.4105	1.0854	1.0326	1.0395
1.2219	1.2064	1.0295	1	1.5329
1.2048	1.4338	1.1809	1.4957	1.021
1.9626	1.0549	1.0515	1.2321	1.0071
1.54	1.5578	1.4785	1.6039	1.3507
1.1279	1.2728	1.0048	1.0145	1.3848
1.6972	1.0913	1.176	1.1749	1.2939
1.214	1.0868	1.0409	1.0939	1.3856
1	1.0716	1.1884	1.2294	1.0603
1.0893	1.6407	1.2523	1.301	1.242
1.0673	1.7152	1.3987	1.0636	1.0479
1.0212	2.3707	1.8604	1.0109	1.0728
1.6421	1.0157	1.0173	1.0462	1.0834
1.2061	1	1.2761	1.3951	2.1289
1.8169	1.1065	1.938	1.537	1.3174
1.7985	1.3809	1.5073	1.0072	1.2997
1.1206	1.4205	1.007	1.034	1.2283
1.3992	1.0138	1.8086	1.0536	1.4754
1.2645	2.0791	1.3128	2.0429	1.0296
1.2432	1.0344	1.1258	1.0704	1.496
1.2667	1.039	1.0618	1.4583	1.0952
1.2271	1.1145	1.2258	1.0238	1.854
1.0403	1.4817	1.0299	1	1.4788
1.1438	2.1798	1.059	1.2292	1.0133
1.1453	1.1037	1.0135	1.1028	1.0646
1.132	1.3465	1.082	1.086	1.3794
1.0733	1.0031	1.4874	1.2722	1.2014
1.4026	1.4633	1.8754	1.0527	1.0889
1.9696	2.2942	1.2579	1.997	1.0062
1.8168	1.6235	1.1227	1.5477	1.066
1.0059	2.527	1.0127	1.0707	1.0133
1.0062	1.5906	1.4858	1	1
1.6734	1.0119	1.0064	1.0424	1
1.5872	1.9989	1.1284	1.0124	1.039
1.8193	1.0237	1.0043	1.2723	1.1972
1.6891	2.157	1.4565	1.0835
1.0461		1.1663	1.1222
1.4366		1.2198	1.1414
1.4589		1.9448	1.8775
1.0495		2.2634	1.2493
1.4976		1.0624	1.0609
1.2268		2.2137	1
1.4351		1.5217	2.3497
1.8547		1.3529	1.0289
1.3444		1	1.1745
1.5077		1.0243	1.0942
1.7952		1.7572	1.5897
1.3631		1.3713	1.0189
1.0211		1.0133	1.07
1.3792		1.5871	1.0321
1.2435		1.7814	1
1.3047		1.3046	1.2528
1.6915		1.632	1.0626
2.0894		1.9102	1.0017
1.8101		1.0257	1.142
1		1.0869	1.2171
2.0104		1.1096	1.0164
1.3434		1.0079	1.2836
1.1833		1.1321	1.2571
1		1.8657	1.3117
1.3593		1.5261	1.0951
1.4714		1.0001	1.032
1.1529		1.2028	1.001
1.7673		1.0006	1.0508
1.5426		2.1313	1.9677
1.1958		1.0062	1.1821
1.721		1.3647	1.8831
1		1.177	1.4019
1.3862		1.0776	1.0051
1.5052		1.0428	1.0314
1.1741		1	1.0004
1.1167		1.0265	1
1.3516		1.4462	1.3665
1.2977		1.6949	1
1.1568		1.5168	1.1372
1.1014		1.3031	1.2088
1.4515		1.058	1.0742
1.2374		1.3292	1
1.4407		1.215	1.0765
1.6048		1.7032	1.1118
1.1857		1.0666	1.1193
1.1868		1.8848	1.0349
1.7524		2.7152	1
1.5773		1.0073	1.1112
1.0109		1.7795	1.1516
1.4163		1.0834	1.3727
1.6706		2.1289	1.3005
1.096		1.3174	1.0028
1.0089		1.2997	1.0221
1.2745		1.2283	1.285
1.3583		1.4754	1.9925
1.2243		1.0296	1.1648
1.0317		1.496	1.4607
1		1.0952	1.4374
1.4251		1.854	1.253
1.218		1.4788	1.0775
2.053		1.0133	1.8312
1.2275		1.0646	1.7572
1.9417		1.3794	1.1875
1.927		1.2014	1.1651
1.3815		1.0889	1.5529
1.7584		1.0062	1.6841
1		1.066	1.0177
1.0675		1.0133	1.1327
1		1	1.1422
1.6363		1
		1.039
		1.1972

## Sheet: Fig S1A
Tconv	iTreg	tTreg
1.02418	0.114457	0.155711
1.09118	0.11966	0.154791
0.894801	0.117079	0.147244

## Sheet: Fig S1B
Ryr2 fl/fl	Ryr2 fl/fl; CD4 cre
62.3	64.1
58.7	63.4
60.8	61.2
60.2	61.5
