# Supplementary material for: Sustained store-operated calcium entry utilizing activated chromatin state leads to instability in iTregs
Source: eLife. 2023 Dec 6;12:RP88874. doi: 10.7554/eLife.88874 (PMC10699804; doi:10.7554/eLife.88874)
Supplement: Figure 2—source data 1. [file elife-88874-fig2-data1.xlsx]

## Sheet: Fig 2A
tTreg Rest	tTreg Act	iTreg Rest	iTreg Act
101.707	99.2768	100.652	27.6087
98.9297	99.7397	100.217	24.5652
99.5082	100.781	99.5652	27.3913
99.8554	100.897	99.5652	27.5

## Sheet: Fig 2C
Tconv					nTreg					iTreg
23min	34min	50min	65min		23min	34min	50min	65min		23min	34min	50min	65min
0.059694	0.07047	0.050948	0.073802		0.042482	0.092955	0.014424	0.011144		0.12705	0.08136	0.077068	0.028825
0.034688	0.059172	0.058251	0.034299		0.11145	0.044696	0.041464	0.023061		0.053092	0.063944	0.025995	0.027783
0.077072	0.045215	0.085452	0.048862		0.071892	0.035034	0.0095171	0.016001		0.050326	0.066829	0.028	0.032601
0.072912	0.064298	0.02348	0.063121		0.11982	0.073006	0.022954	0.0082914		0.061426	0.022993	0.027744	0.14498
0.055476	0.057758	0.044624	0.03705		0.041086	0.035024	0.01752	0.03881		0.045328	0.069325	0.14899	0.15862
0.12119	0.052727	0.064146	0.032889		0.10853	0.08352	0.011126	0.012386		0.022905	0.063522	0.20819	0.033565
0.044246	0.039739	0.056778	0.045645		0.046006	0.075243	0.056276	0.014464		0.10849	0.031447	0.02768	0.043916
0.069774	0.074676	0.049826	0.014337		0.14178	0.040407	0.060523	0.0063858		0.036272	0.61086	0.030891	0.076826
0.070051	0.062963	0.037998	0.058567		0.082901	0.035941	0.011517	0.016526		0.052171	0.11998	0.059823	0.023136
0.10155	0.058268	0.05604	0.043137		0.054171	0.15074	0.012327	0.018847		0.027551	0.042727	0.025716	0.012594
0.037968	0.073972	0.067489	0.085526		0.023693	0.10402	0.014294	0.012834		0.031136	0.051124	0.02743	0.044798
0.10018	0.079596	0.048388	0.018838		0.053431	0.092267	0.0063857	0.011084		0.044542	0.044956	0.11075	0.030647
0.02448	0.051043	0.051936	0.020815		0.074559	0.06707	0.0089222	0.069751		0.020981	0.037059	0.039594	0.04121
0.10933	0.046231	0.040821	0.078453		0.12019	0.081645	0.013313	0.02458		0.034148	0.070186	0.019269	0.033256
0.083162	0.11091	0.039018	0.02916		0.079188	0.085803	0.0086044	0.01965		0.030967	0.024981	0.13026	0.042147
0.10561	0.057008	0.076624	0.10427		0.12301	0.065061	0.013368	0.01429		0.10015	0.10682	0.030574	0.022124
0.052647	0.083636	0.063864	0.042717		0.057778	0.088237	0.012823	0.0086412		0.043638	0.033725	0.023478	0.02761
0.057779	0.041686	0.053156	0.05173		0.06431	0.077553	0.011619	0.008915		0.12634	0.045287	0.10816	0.05339
0.030929	0.079838	0.040327	0.045111		0.097473	0.013168	0.24564	0.0074733		0.052238	0.07826	0.073797	0.032716
0.048505	0.083665	0.15604	0.033689		0.073082	0.061672	0.01422	0.010296		0.018326	0.043969	0.026576	0.027548
0.089589	0.021844	0.073236	0.011827		0.025507	0.045831	0.027844	0.011104		0.055317	0.060647	0.044478	0.022308
0.055469	0.05579	0.060271	0.025417		0.071892	0.056606	0.018132	0.015476		0.0692	0.10393	0.043745	0.023691
0.075334	0.038849	0.090387	0.095752		0.04053	0.046857	0.01063	0.054025		0.083696	0.045233	0.03001	0.16224
0.068041	0.098928	0.072973	0.029704		0.10879	0.093516	0.036077	0.026155		0.048367	0.057502	0.049523	0.015555
0.058914	0.080162	0.065011	0.044485		0.077126	0.070592	0.023055	0.018892		0.075396	0.062389	0.11737	0.016752
0.03427	0.08925	0.0454	0.040913		0.14044	0.11191	0.011118	0.01122		0.067091	0.034735	0.048498	0.081781
0.084457	0.065198	0.03294	0.049199		0.024467	0.06223	0.0055172	0.013265		0.063204	0.068184	0.14072	0.032529
0.055038	0.06724	0.027361	0.13246		0.14143	0.067281	0.0086182	0.016921		0.11819	0.031777	0.028185	0.01844
0.072718	0.084823	0.072572	0.045401		0.096709	0.1032	0.027547	0.020793		0.016862	0.10272	0.020843	0.096518
0.11014	0.082379	0.031738	0.09437		0.061668	0.17169	0.0061988	0.020424		0.057156	0.047856	0.078567	0.031635
0.075904	0.046295	0.06646	0.046629		0.13192	0.11577	0.017692	0.0095421		0.030902	0.054796	0.038133	0.024292
0.044714	0.14006	0.020683	0.025001		0.074748	0.057135	0.01596	0.023608		0.039079	0.086149	0.025946	0.098747
0.020656	0.054518	0.060984	0.047917		0.067363	0.038403	0.012944	0.013778		0.062656	0.03927	0.035125	0.023521
0.061076	0.080573	0.058567	0.024831		0.051692	0.040486	0.0348	0.018407		0.09612	0.02864	0.037741	0.017689
0.069871	0.050651	0.09435	0.012852		0.044242	0.13914	0.014053	0.015757		0.024168	0.094466	0.015393	0.052747
0.085191	0.045921	0.091948	0.057195		0.084441	0.047862	0.019029	0.023642		0.036091	0.036611	0.094741	0.02552
0.038795	0.09764	0.061302	0.030975		0.08734	0.098766	0.015585	0.011321		0.027286	0.021364	0.030673	0.08692
0.078178	0.08804	0.077609	0.06891		0.038742	0.084305	0.011164	0.074227		0.032933	0.040755	0.026107	0.032198
0.072016	0.10574	0.052834	0.023977		0.074312	0.072575	0.031222	0.017238		0.080218	0.056123	0.11725	0.020904
0.032137	0.093107	0.045609	0.028434		0.046361	0.042626	0.016681	0.030871		0.13844	0.070927	0.0744	0.033746
0.032563	0.046957	0.14285	0.024135		0.091086	0.33493	0.0093436	0.0090094		0.058671	0.058406	0.032444	0.028269
0.082565	0.054066	0.05727	0.041739		0.05674	0.030491	0.023923	0.092292		0.042614	0.035794	0.02571	0.064959
0.025596	0.061227	0.044577	0.090024		0.032969	0.049786	0.0083266	0.010063		0.047559	0.077872	0.034761	0.071971
0.032328	0.063696	0.10538	0.072724		0.059487	0.034257	0.013059	0.015727		0.047012	0.059867	0.04536	0.070303
0.058943	0.1151	0.067184	0.039555		0.068791	0.09476	0.0147	0.0060357		0.050472	0.061408	0.10325	0.073115
0.060333	0.066567	0.068113	0.044643		0.029886	0.059052	0.013002	0.017812		0.061257	0.038851	0.064086	0.030586
0.1352	0.077749	0.048651	0.025096		0.063584	0.07091	0.023533	0.0066927		0.032548	0.083747	0.080625	0.055089
0.13026	0.085578	0.032926	0.039383		0.10495	0.098437	0.010759	0.009109		0.074358	0.08543	0.0487	0.038143
0.11657	0.091435	0.043734	0.020363		0.11613	0.098373	0.0069795	0.0063617		0.055356	0.039996	0.034693	0.098979
0.05045	0.066392	0.063417	0.15249		0.11542	0.14944	0.037221	0.026763		0.067375	0.19482	0.0637	0.01557
0.044062	0.037124	0.045406	0.014511		0.066536	0.098189	0.013756	0.018696		0.035657	0.09002	0.016748	0.090171
0.10136	0.065825	0.054885	0.066569		0.039605	0.11094	0.012827	0.012063		0.044296	0.047925	0.048732	0.047643
0.059867	0.081906	0.027539	0.11242		0.041629	0.14565	0.0091106	0.0279		0.046983	0.051996	0.037509	0.088858
0.14907	0.064433	0.043901	0.058782		0.048419	0.11119	0.010888	0.041221		0.056211	0.035241	0.11921	0.028331
0.055112	0.058223	0.065103	0.084214		0.036802	0.026857	0.0093426	0.014459		0.041707	0.016695	0.048959	0.029843
0.1168	0.1165	0.03936	0.048235		0.098344	0.10005	0.017001	0.021427		0.090354	0.056918	0.036969	0.01425
0.047068	0.076819	0.015958	0.11037		0.16884	0.14411	0.0091139	0.010403		0.030221	0.020966	0.013012	0.014683
0.068645	0.070891	0.069919	0.12824		0.043825	0.060203	0.02904	0.035023		0.036738	0.030672	0.05352	0.031922
0.11257	0.094017	0.047671	0.032715		0.05342	0.091734	0.016903	0.012924		0.041966	0.040401	0.024941	0.021995
0.039206	0.049586	0.056824	0.070143		0.045185	0.099814	0.011588	0.024056		0.038891	0.062677	0.030082	0.029816
0.043174	0.05369	0.023071	0.050097		0.10047	0.067651	0.013972	0.038261		0.031954	0.038964	0.023874	0.048774
0.070782	0.075286	0.094157	0.08331		0.18151	0.037378	0.0099586	0.018621		0.020384	0.069264	0.035395	0.013288
0.1009	0.0825	0.064368	0.044858		0.038871	0.042184	0.022639	0.025235		0.078748	0.029106	0.12329	0.10028
0.034989	0.067025	0.12868	0.036597		0.14402	0.061926	0.026872	0.013832		0.044075	0.041726	0.009607	0.033841
0.043521	0.047589	0.059551	0.046394		0.02392	0.052885	0.051595	0.035066		0.029406	0.044645	0.022004	0.030429
0.091586	0.076656	0.14622	0.09698		0.078946	0.038809	0.020161	0.0074494		0.089372	0.051722	0.028285	0.034995
0.046514	0.065307	0.041589	0.056513		0.054356	0.092321	0.022845	0.046477		0.033177	0.051571	0.037686	0.034584
0.098872	0.081313	0.072009	0.087709		0.064428	0.043101	0.016226	0.024477		0.036968	0.060375	0.024806	0.04412
0.03119	0.079711	0.063096	0.038827		0.11054	0.094473	0.022966	0.037108		0.042941	0.04177	0.069792	0.043079
0.062995	0.042883	0.028403	0.065263		0.0195	0.073332	0.0096821	0.018997		0.13682	0.020585	0.13177	0.037162
0.049519	0.054969	0.071596	0.11084		0.039384	0.020743	0.013409	0.044932		0.17854	0.07649	0.034087	0.030024
0.2963	0.084385	0.030408	0.026505		0.094303	0.061797	0.068335	0.054489		0.021268	0.0338	0.089342	0.02942
0.025752	0.11749	0.056223	0.086201		0.13526	0.024973	0.027493	0.045745		0.050834	0.03369	0.026837	0.029777
0.053172	0.040669	0.027921	0.031103		0.10478	0.069508	0.013586	0.018993		0.020305	0.013898	0.029741	0.028285
0.044199	0.059778	0.073354	0.014353		0.038847	0.038859	0.014142	0.072622		0.055341	0.0232	0.05645	0.064815
0.075895	0.098308	0.079399	0.080125		0.02833	0.02066	0.036664	0.027134		0.045805	0.035206	0.095098	0.081743
0.06175	0.092062	0.039245	0.054537		0.049422	0.070662	0.015359	0.0096065		0.09555	0.015681	0.017237	0.018119
0.087032	0.080489	0.11248	0.070229		0.057914	0.11391	0.029258	0.008132		0.068677	0.038145	0.039794	0.035202
0.044359	0.093974	0.051117	0.020222		0.10065	0.063934	0.018635	0.046439		0.016685	0.040638	0.072047	0.075457
0.067297	0.08585	0.036088	0.055741		0.080406	0.026339	0.0077536	0.0070087		0.18817	0.032129	0.035005	0.062582
0.056868	0.078995	0.076248	0.051117		0.12684	0.032894	0.04197	0.013162		0.043278	0.038732	0.020008	0.025245
0.084553	0.057998	0.1023	0.068595		0.11782	0.15689	0.066335	0.0096178		0.13323	0.088276	0.02606	0.062124
0.066034	0.055875	0.033015	0.053043		0.090939	0.10593	0.042035	0.029305		0.050329	0.092885	0.028605	0.016584
0.042822	0.082931	0.035362	0.063679		0.098808	0.11272	0.010023	0.11843		0.022376	0.045544		0.03252
0.099371	0.075519	0.06909	0.079217		0.045995	0.02627	0.021211	0.011791		0.048293	0.054068		0.031128
0.07152	0.04807	0.067185	0.059053		0.094729	0.062653	0.038812	0.061106		0.039412	0.049117
0.041304	0.057649	0.034742	0.020243		0.052639	0.094092	0.018428	0.017952		0.11565	0.12423
0.040862	0.051125	0.048571	0.039659		0.023129	0.069395	0.068946	0.016789		0.036224	0.036438
0.041859	0.087325	0.033095	0.052107		0.16987	0.067544	0.024759	0.048219		0.041512	0.021296
0.039759	0.12095	0.15251	0.063567		0.11817	0.034628	0.009537	0.016834		0.072899	0.052247
0.052147	0.077036	0.059608	0.058254		0.075802	0.10657	0.0093221	0.020033		0.058288	0.039558
0.034552	0.07206	0.1154	0.09468		0.1216	0.076648	0.011355	0.027543		0.14588	0.042524
0.027821	0.096056	0.037331	0.045525		0.026479	0.079761	0.014469	0.013288		0.090257	0.082326
0.072322	0.082683	0.070271	0.053781		0.093291	0.087982	0.011574	0.028075		0.07679	0.10995
0.054316	0.076519	0.085336	0.044877		0.50544	0.046696	0.013627	0.020251		0.031217	0.066189
0.039314	0.064753	0.063032	0.027802		0.042106	0.10554	0.022969	0.023802		0.07379	0.05944
0.080904	0.085765	0.048531	0.061998		0.097136	0.049545	0.010576	0.023269		0.040691	0.042421
0.032951	0.078269	0.073695	0.10999		0.084568	0.023539	0.034515	0.037508		0.032273	0.038342
0.039559	0.076312	0.044845	0.055374		0.18367	0.021875	0.0083276	0.014846		0.043961	0.028001
0.046839	0.10046	0.060649	0.040329		0.082028	0.024336	0.0084044	0.049559		0.054616	0.056971
0.081383	0.055796	0.12582	0.05128		0.015489	0.16041	0.014717	0.020374		0.10752	0.084077
0.082162	0.095285	0.11993	0.053957		0.056514	0.12455	0.013206	0.08985		0.12858	0.056296
0.057245	0.09059	0.036835	0.022451		0.053721	0.032195	0.011326	0.029638		0.090196	0.046437
0.08686	0.087509	0.17053	0.060634		0.045876	0.042016	0.078626	0.010181		0.029382	0.060288
0.059428	0.090745	0.042995	0.01495		0.058072	0.095002	0.026196	0.024473		0.087045	0.049838
0.087576	0.052468	0.052294	0.018111		0.13263	0.15259	0.008211	0.016125		0.038102	0.047796
0.064079	0.07019	0.10124	0.040605		0.044971	0.092631	0.017713	0.020907		0.06209	0.074695
0.058975	0.080826	0.1217	0.045568		0.040761	0.089442	0.0070768	0.05248		0.12615	0.013639
0.092946	0.069791	0.15171	0.061662		0.084024	0.092507	0.0079245	0.025567		0.062174	0.044421
0.075912	0.058618	0.030291	0.024889		0.079412	0.13248	0.011613	0.04137		0.034878	0.029795
0.071955	0.048161	0.010449	0.034656		0.063729	0.15856	0.011356	0.010332		0.0074776	0.07502
0.041644	0.081621	0.068721	0.034956		0.11694	0.036583	0.02136	0.015897		0.057562	0.087017
0.041885	0.11458	0.060339	0.047281		0.053236	0.082219	0.013879	0.02539		0.10399	0.097225
0.034054	0.079275	0.074993	0.043137		0.20595	0.087547	0.017512	0.02446		0.019534	0.081535
0.13914	0.054739	0.030947	0.03547		0.071206	0.096113	0.014707	0.074037		0.059239	0.098078
0.049033	0.073371	0.11693	0.030029		0.11763	0.099478	0.010276	0.033513		0.046309	0.049517
0.096629	0.077076	0.057047	0.082231		0.042577	0.068999	0.046244	0.026893		0.079437	0.080506
0.14584	0.045528	0.051332	0.049458		0.064707	0.085313	0.017903	0.023667		0.060872	0.060332
0.026913	0.05496	0.052061	0.063711		0.059007	0.045445	0.056682	0.012198		0.041241	0.087608
0.064472	0.13954	0.058352	0.045951		0.11312	0.0157	0.010118	0.0136		0.10017	0.036719
0.074061	0.067146	0.032956	0.10668		0.1072	0.099959	0.010538	0.018142		0.029291	0.035602
0.05541	0.073191	0.05108	0.057295		0.15499	0.042284	0.015783	0.016988		0.043455	0.047952
0.02232	0.077453	0.03821	0.066422		0.064296	0.15129	0.013008	0.14091		0.026444	0.048849
0.084295	0.075902	0.034247	0.066579		0.12642	0.040388	0.016354	0.05951		0.037537	0.060553
0.066383	0.065756	0.042245	0.14949		0.16661	0.079297	0.011301	0.018274		0.037508	0.041981
0.072932	0.063757	0.084031	0.073895		0.039831	0.02578	0.011162	0.011432		0.071222	0.034286
0.058391	0.08128	0.065227	0.040526		0.076687	0.026916	0.011117	0.027318		0.029859	0.053337
0.042074	0.093447	0.038155	0.035991		0.10427	0.038866	0.019272	0.18602		0.059922	0.066236
0.12436	0.053153	0.032194	0.053162		0.073459	0.035675	0.036817	0.016644			0.076394
0.16257	0.058447	0.067649	0.060521		0.24065	0.037904	0.013235	0.016225			0.095511
0.051675	0.039557	0.073706	0.068204		0.017438	0.028571	0.012202	0.020683			0.059587
0.065704	0.046801	0.063655	0.018941		0.13184	0.064328	0.031104	0.060191			0.068917
0.061311	0.080985	0.069001	0.081643		0.11168	0.038943	0.020137	0.051225			0.042171
0.062068	0.11904	0.049903	0.040687		0.11087	0.066357	0.011536	0.012428			0.035518
0.018776	0.088697	0.044955	0.064022		0.05611	0.064531	0.012884	0.012528			0.074767
0.045682	0.041134	0.035308	0.028783		0.10474	0.075569	0.019994	0.020718			0.045262
0.030789	0.076986	0.089526	0.045249		0.013419	0.0287	0.016123	0.0071198			0.035465
0.078459	0.079643	0.052829	0.067395		0.07006	0.050041	0.010333	0.099029			0.053029
0.063843	0.077274	0.022498	0.046993		0.068744	0.048689	0.03889	0.0091073			0.057579
0.09394	0.074934	0.063714	0.045919		0.13883	0.071762	0.018799	0.01316			0.065859
0.091591	0.057035	0.070427	0.047936		0.066841		0.013459	0.05173			0.060385
0.046598	0.051685	0.054642	0.11422		0.074429		0.024288	0.014404			0.038904
0.089025	0.1186	0.34785	0.05453		0.024193		0.01657	0.019384			0.020195
0.066632	0.049291	0.087105	0.048673		0.053068		0.014206	0.02153			0.044977
0.039785	0.055029	0.043734	0.034078		0.053637		0.011074	0.014474			0.063665
0.038116	0.092178	0.050351	0.055546		0.069283		0.17159	0.017634			0.07546
0.049839	0.048362	0.064383	0.039216		0.11131		0.025144	0.021845			0.070116
0.082242	0.062226	0.094607	0.092234		0.025525		0.02831	0.031533			0.022713
0.097841	0.077516	0.059982	0.057884		0.15132		0.017213	0.15908			0.051353
0.081583	0.075702	0.035575	0.031279		0.028002		0.012069	0.022068			0.054831
0.11459	0.04643	0.10751	0.094675		0.074955		0.0092108	0.027404			0.099197
0.038792	0.051858	0.091142	0.048497		0.10295		0.019426	0.019342			0.035867
0.082168	0.06531	0.040599	0.034722		0.089894		0.016279	0.029954			0.043658
0.078537	0.076594	0.038924	0.079253		0.082898		0.025628	0.023542			0.063002
0.066814	0.10259	0.12822	0.057507		0.10706		0.020208	0.028232			0.096337
0.040508	0.044241	0.11628	0.054592		0.098754		0.01204	0.021147			0.033518
0.084553	0.063525	0.042514	0.024437		0.11622		0.046695	0.016777			0.080679
0.065639	0.061489	0.041083	0.063793		0.15421		0.026505	0.015847			0.034866
0.027613	0.082299	0.03374	0.090152		0.024496		0.032583	0.17744			0.058227
0.087814	0.093845	0.051155	0.046339		0.041023		0.0088927	0.027134			0.035832
0.039787	0.037624	0.045629	0.043091		0.066592		0.019447	0.0080665			0.020248
0.12082	0.05222	0.052512	0.064746		0.05182		0.1006	0.032318			0.056602
0.21175	0.080324	0.10894	0.05483		0.081703		0.016547	0.012656			0.056653
0.04259	0.053231	0.075746	0.041775		0.023826		0.023541	0.082714			0.076163
0.065356	0.061202	0.056316	0.071321		0.014153		0.0082237	0.027205			0.030464
0.079779	0.050992	0.072621	0.056508		0.077539		0.018474	0.023811			0.041314
0.079986	0.0587	0.055652	0.026103		0.071065		0.0095865	0.020809			0.025504
0.05014	0.074912	0.073918	0.084901		0.10602		0.018379	0.017838			0.032348
0.054967	0.066825	0.096046	0.077289		0.044134		0.010487	0.01696			0.072073
0.067258	0.07047	0.085132	0.069964		0.12353		0.010513	0.0097314			0.0396
0.08198	0.049363	0.075785	0.08663		0.16772		0.027168	0.069938			0.047687
0.082552	0.059862	0.039584	0.068417		0.11445		0.074986	0.015928			0.037395
0.029359	0.059498	0.076852	0.058131		0.047894		0.012774	0.035359			0.031059
0.05735	0.059762	0.05243	0.031428		0.1161		0.020773	0.010381			0.061413
0.095402	0.054263	0.097212	0.053033		0.15228		0.011347	0.028545			0.082176
0.049748	0.06605	0.063376	0.050944		0.097099		0.022676	0.017684			0.14237
0.035787	0.078923	0.059111	0.050432		0.097435		0.019558	0.01602			0.012671
0.051152	0.0577	0.073001	0.034557				0.0241	0.018572			0.03887
0.052214	0.058129	0.046032	0.024636				0.023007	0.017583			0.054547
0.064106	0.081746	0.13271	0.022634				0.11105	0.023859			0.062105
0.10138	0.15504	0.094748	0.050234				0.015839	0.021001			0.036091
0.063699	0.084261	0.058294	0.036421				0.0068963	0.027616			0.13209
0.022338	0.071537	0.061623	0.07157				0.035968	0.084212			0.040711
0.080483	0.10417	0.062003	0.058434				0.015395	0.057111			0.15448
0.047888	0.058789	0.047649	0.078462				0.032496	0.017019			0.031381
0.097755	0.079021	0.061024	0.045339				0.017755	0.02389			0.063663
0.083989	0.063574	0.044635	0.030196				0.020569	0.015414			0.028361
0.043696	0.046535	0.025784	0.058599				0.0083698	0.017874			0.048931
0.030374	0.07674	0.050234	0.054409				0.018802	0.016318			0.073092
0.11553	0.067651	0.027785	0.046019				0.0084616	0.0090757			0.033228
0.098172	0.050472	0.036255	0.067401				0.10373	0.015518			0.0356
0.089071	0.065615	0.11262	0.051284				0.0067305	0.018552			0.055556
0.07691	0.087008	0.05255	0.036492				0.015234	0.036022			0.080558
0.046929	0.12932	0.073134	0.075452				0.072956	0.056649			0.026674
0.081367	0.093268	0.11563	0.078626				0.013945	0.012628			0.071027
0.053281	0.056694	0.08231	0.03967				0.0077795	0.021316			0.044155
0.056546	0.053685	0.098616	0.040015				0.011705	0.028748			0.056839
0.055082	0.073999	0.049672	0.029804				0.02222	0.06833			0.10775
0.057797	0.047844	0.061533	0.038371				0.070162	0.021771			0.024615
0.071713	0.079069	0.062006	0.017638				0.029495	0.015654			0.031434
0.03245	0.056938	0.045292	0.083016				0.0080514	0.010768			0.11522
0.027788	0.059632	0.15567	0.030056				0.014675	0.021541			0.045811
0.076146	0.069953	0.08589	0.038135				0.0096896	0.028021			0.15658
0.027235	0.073856	0.080225	0.046812				0.032782	0.030741			0.026295
0.038081	0.055208	0.023903	0.049464				0.030083	0.022571			0.10557
0.056333	0.094224	0.046196	0.033874				0.019222	0.0092183			0.052216
0.037843	0.071632	0.088366	0.037003				0.019022	0.011471			0.066352
0.076305	0.060659	0.052585	0.050505				0.018164	0.0089225			0.23038
0.074319	0.091504	0.042365	0.071521				0.0071478	0.012933			0.10651
0.029964	0.038079	0.098238	0.021615				0.052324	0.030771			0.064824
0.08158	0.081864	0.055951	0.070922				0.011212	0.12884			0.083429
0.071161	0.057032	0.028847	0.051476				0.038453	0.014768			0.048656
0.1204	0.091988	0.063284	0.020457				0.016579	0.019195			0.085842
0.038172	0.09167	0.077397	0.07075				0.011781	0.01804			0.075599
0.072429	0.030646	0.05749	0.019252				0.01075	0.0080669			0.048029
0.062422	0.061062	0.089003	0.029977				0.019924	0.05895			0.037781
0.076292	0.072715	0.048734	0.051187				0.024629	0.010581			0.026575
0.075077	0.096586	0.13384	0.036309				0.072208	0.016935			0.031168
0.043945	0.097487	0.127	0.18812				0.10251				0.020882
0.1034	0.060767	0.04167	0.04745				0.013012				0.051741
0.060917	0.090272	0.072839	0.068613				0.010302				0.085739
0.067588	0.078019	0.063034	0.037284				0.015279				0.043814
0.080242	0.1391	0.042694	0.048123				0.034471				0.025499
0.040165	0.084283	0.069551	0.027924				0.046847				0.054729
0.035775	0.061469	0.015927	0.046522				0.052294				0.13113
0.087463	0.072868	0.10682	0.062369				0.021404				0.056058
0.047294	0.052145	0.081073	0.072732				0.0173				0.080384
0.095263	0.024833	0.10964	0.038687				0.017932				0.088835
0.086789	0.042629	0.044499	0.059718				0.050617				0.05215
0.038966	0.07655	0.041694	0.11296				0.012654				0.049743
0.072697	0.097765	0.063714	0.070144				0.011423				0.15301
0.10078	0.04015	0.042431	0.060638				0.022812				0.02376
0.065048	0.062968	0.096315	0.079871				0.013659				0.032053
0.068181	0.089284	0.056086	0.029729				0.037973				0.03214
0.091416	0.048306	0.051511	0.060981				0.015643				0.051844
0.049572	0.062194	0.041583	0.037162				0.027858				0.047489
0.027753	0.05706	0.12253	0.064683				0.052624				0.054591
0.047531	0.051496	0.11121	0.038248				0.0074997				0.037175
0.044825	0.1165	0.030802	0.055987				0.027725				0.035715
0.026367	0.069765	0.029749	0.07128				0.01195				0.079705
0.083978	0.08555	0.043117	0.044783				0.045714				0.12143
0.037042	0.036989	0.081498	0.086441				0.019629				0.047093
0.03327	0.095751	0.065607	0.084348				0.0201				0.05206
0.07694	0.092756	0.04878	0.016731				0.028563				0.062703
0.13028	0.067557	0.05664	0.064177				0.046242				0.067822
0.040448	0.07552	0.064535	0.053148				0.015407				0.047485
0.069672	0.058911	0.050173	0.11378				0.010577				0.08133
0.033671	0.073751	0.059833	0.03401				0.027595				0.022047
0.054193	0.084756	0.072071	0.080455				0.016574				0.027229
0.06384	0.042203	0.061251	0.067021				0.017871				0.037333
0.042282	0.042346	0.034761	0.053604				0.055564				0.048748
0.12434	0.049354	0.062342	0.043043				0.0081375				0.096034
0.062884	0.075239	0.03714	0.03612				0.0325				0.037165
0.046013	0.091883	0.098182	0.059062				0.013108				0.084422
0.12874	0.082721	0.051964	0.074385				0.011379				0.033245

## Sheet: Fig 2E
Rest	Act	Act+TG 1uM	Act+TG 100nM	Act+TG 10nM
101.992	98.652	71.2156	79.9237	88.5125
100.322	96.8627	68.5912	79.5658	86.8424
97.6977	93.7612	63.4618	74.1978	81.713

## Sheet: Fig S2A Right
steady state	SOCE
1.1068	1.3728
1.0438	1.1917
1.154	1.471
1.3682	1
1.1183	1.0173
1.2991	1.3094
1	1.3139
1.0378	1.3674
1.4392	1.1086
1.2686	1.794
1.0542	1.5844
1.0863	1.0461
1.0525	1.5566
1	1.7427
1	1.0289
1.033	1.0081
1.5401	1.8615
1.3458	1.0032
1.2209	1.1284
1.0682	1.0128
1.0876	1.2292
1	1.5189
1.2173	1.6164
1.4681	1.341
1.0493	1.0339
1.5292	1.3709
1.3468	1.4128
1	1.0035
1.4161	1
1.5044	1.5521
1.1302	1.6615
1	1.2764
1.0561	1.1419
1.3902	1.4736
1.1938	1.069
1.0128	1.0663
1.1902	1.0962
1.5302	1.8616
1.1448	1.6811
1.1471	1.1413
1.0567	1.0904
1.0448	1.2348
1.0402	1.2822
1.458	1.0629
1.0087	1.7241
1.4175	1.8684
1.0785	2.1963
1.0387	2.1204
1.4347	1.0221
1.3504	1.0008

## Sheet: Fig S2B Left
Rest	0.5+0.5	0.5+1	1+1	2+2	4+4
100.339	101.471	102.376	102.376	100.453	100.339
100.566	100.905	101.244	100.679	100.226	99.2081
99.095	99.7738	100.453	99.6606	99.7738	102.149

## Sheet: Fig S2B Right
Rest	0.5+0.5	0.5+1	1+1	2+2	4+4
100.487	36.9468	32.4807	31.8717	31.8717	32.4807
100.081	38.5709	34.5108	34.1048	34.3077	30.2477
99.4722	38.9769	36.9468	37.1498	36.5408	29.4356

## Sheet: Fig S2C
Time（min）	Tconv	tTreg	iTreg
0	1	1	1
0.5	1.4686	1.55882	1.40146
1	1.65701	1.69412	1.45256
2	1.56039	1.52941	1.36496
