# Supplementary material for: Sustained store-operated calcium entry utilizing activated chromatin state leads to instability in iTregs
Source: eLife. 2023 Dec 6;12:RP88874. doi: 10.7554/eLife.88874 (PMC10699804; doi:10.7554/eLife.88874)
Supplement: Figure 4—source data 1. [file elife-88874-fig4-data1.xlsx]

## Sheet: Fig 4A
rest	restim	restim+CsA	Restim+CM-4620
98.2375	40.2196	76.7408	61.9474
101.242	24.6172	73.3892	59.5204
99.0465	27.0442	71.8867	60.2138
101.474	25.5418	71.54	60.2138

## Sheet: Fig 4G
Well	Fluor	Target	Content	Sample	Biological Set Name	Cq	Cq Mean		Fasl	Stat2	Stat3	Jak2	Runx3	Irf4	Atf3	Tbx21	Il21	Il12rb2	Foxp3
A01	SYBR	Fasl	Unkn	Rest		24.5982	24.5982	Rest-1	0.94861	0.986892	1.02305	0.878845	1.00101	0.996404	0.988324	1.03101	1.00439	0.940434	1.02016
A02	SYBR	Fasl	Unkn	Rest		24.446	24.446	Rest-2	1.05417	1.01328	0.977469	1.13786	0.998986	1.00361	1.01181	0.969919	0.995633	1.06334	0.980235
A03	SYBR	Stat2	Unkn	Rest		22.6639	22.6639	Restim-1	4.05317	2.25575	1.9865	2.71782	2.38698	2.89594	4.14885	2.46181	5.4175	7.13275	0.477304
A04	SYBR	Stat2	Unkn	Rest		22.6258	22.6258	Restim-2	4.77585	2.50328	2.68193	2.97266	1.92602	3.18822	3.92675	2.86058	5.53226	6.82756	0.393177
A05	SYBR	Stat3	Unkn	Rest		22.0827	22.0827	Restim+CsA-1	1.8944	1.62116	1.80936	1.33739	1.27446	1.35598	2.14383	1.13471	3.55567	3.59186	0.708207
A06	SYBR	Stat3	Unkn	Rest		22.1485	22.1485	Restim+CsA-2	2.01733	1.79181	1.6362	1.35785	1.36482	1.45907	2.14973	1.29502	3.41856	4.27273	0.733676
A07	SYBR	Jak2	Unkn	Rest		24.8879	24.8879	Restim+CM-4620-1	1.44726	1.72575	1.78034	1.84752	1.75796	1.93006	1.49268	0.921061	3.89772	4.06406	0.927968
A08	SYBR	Jak2	Unkn	Rest		24.5153	24.5153	Restim+CM-4620-2	1.6728	1.69945	2.09625	1.69689	1.56907	1.80327	1.82662	1.00547	3.58063	4.19694	0.846747
A09	SYBR	Runx3	Unkn	Rest		23.4004	23.4004
A10	SYBR	Runx3	Unkn	Rest		23.4033	23.4033
A11	SYBR	Irf4	Unkn	Rest		19.3434	19.3434
A12	SYBR	Irf4	Unkn	Rest		19.333	19.333
B01	SYBR	Fasl	Unkn	Restim		23.033	23.033
B02	SYBR	Fasl	Unkn	Restim		22.7963	22.7963
B03	SYBR	Stat2	Unkn	Restim		22.0013	22.0013
B04	SYBR	Stat2	Unkn	Restim		21.8511	21.8511
B05	SYBR	Stat3	Unkn	Restim		21.6554	21.6554
B06	SYBR	Stat3	Unkn	Restim		21.2223	21.2223
B07	SYBR	Jak2	Unkn	Restim		23.7892	23.7892
B08	SYBR	Jak2	Unkn	Restim		23.6599	23.6599
B09	SYBR	Runx3	Unkn	Restim		22.6767	22.6767
B10	SYBR	Runx3	Unkn	Restim		22.9862	22.9862
B11	SYBR	Irf4	Unkn	Restim		18.3342	18.3342
B12	SYBR	Irf4	Unkn	Restim		18.1955	18.1955
C01	SYBR	Fasl	Unkn	+CsA		23.2104	23.2104
C02	SYBR	Fasl	Unkn	+CsA		23.1196	23.1196
C03	SYBR	Stat2	Unkn	+CsA		21.5578	21.5578
C04	SYBR	Stat2	Unkn	+CsA		21.4135	21.4135
C05	SYBR	Stat3	Unkn	+CsA		20.8701	20.8701
C06	SYBR	Stat3	Unkn	+CsA		21.0153	21.0153
C07	SYBR	Jak2	Unkn	+CsA		23.8922	23.8922
C08	SYBR	Jak2	Unkn	+CsA		23.8703	23.8703
C09	SYBR	Runx3	Unkn	+CsA		22.662	22.662
C10	SYBR	Runx3	Unkn	+CsA		22.5631	22.5631
C11	SYBR	Irf4	Unkn	+CsA		18.5089	18.5089
C12	SYBR	Irf4	Unkn	+CsA		18.4032	18.4032
D01	SYBR	Fasl	Unkn	+CM-4620		24.1888	24.1888
D02	SYBR	Fasl	Unkn	+CM-4620		23.9798	23.9798
D03	SYBR	Stat2	Unkn	+CM-4620		22.0577	22.0577
D04	SYBR	Stat2	Unkn	+CM-4620		22.0798	22.0798
D05	SYBR	Stat3	Unkn	+CM-4620		21.4835	21.4835
D06	SYBR	Stat3	Unkn	+CM-4620		21.2478	21.2478
D07	SYBR	Jak2	Unkn	+CM-4620		24.016	24.016
D08	SYBR	Jak2	Unkn	+CM-4620		24.1387	24.1387
D09	SYBR	Runx3	Unkn	+CM-4620		22.7879	22.7879
D10	SYBR	Runx3	Unkn	+CM-4620		22.9519	22.9519
D11	SYBR	Irf4	Unkn	+CM-4620		18.5896	18.5896
D12	SYBR	Irf4	Unkn	+CM-4620		18.6876	18.6876
E01	SYBR	Atf3	Unkn	Rest		22.6116	22.6116
E02	SYBR	Atf3	Unkn	Rest		22.5777	22.5777
E03	SYBR	Tbx21	Unkn	Rest		24.3952	24.3952
E04	SYBR	Tbx21	Unkn	Rest		24.4833	24.4833
E05	SYBR	Il21	Unkn	Rest		21.4646	21.4646
E06	SYBR	Il21	Unkn	Rest		21.4772	21.4772
E07	SYBR	Il12rb2	Unkn	Rest		21.1053	21.1053
E08	SYBR	Il12rb2	Unkn	Rest		20.9281	20.9281
E09	SYBR	Foxp3	Unkn	Rest		19.4338	19.4338
E10	SYBR	Foxp3	Unkn	Rest		19.4914	19.4914
E11	SYBR	18s	Unkn	Rest		9.70562	9.70562
E12	SYBR	18s	Unkn	Rest		9.67799	9.67799
F01	SYBR	Atf3	Unkn	Restim		21.072	21.072
F02	SYBR	Atf3	Unkn	Restim		21.1514	21.1514
F03	SYBR	Tbx21	Unkn	Restim		23.6696	23.6696
F04	SYBR	Tbx21	Unkn	Restim		23.453	23.453
F05	SYBR	Il21	Unkn	Restim		19.5633	19.5633
F06	SYBR	Il21	Unkn	Restim		19.533	19.533
F07	SYBR	Il12rb2	Unkn	Restim		18.7122	18.7122
F08	SYBR	Il12rb2	Unkn	Restim		18.7753	18.7753
F09	SYBR	Foxp3	Unkn	Restim		20.5897	20.5897
F10	SYBR	Foxp3	Unkn	Restim		20.8694	20.8694
F11	SYBR	18s	Unkn	Restim		9.77911	9.77911
F12	SYBR	18s	Unkn	Restim		9.72533	9.72533
G01	SYBR	Atf3	Unkn	+CsA		21.1045	21.1045
G02	SYBR	Atf3	Unkn	+CsA		21.1005	21.1005
G03	SYBR	Tbx21	Unkn	+CsA		23.867	23.867
G04	SYBR	Tbx21	Unkn	+CsA		23.6763	23.6763
G05	SYBR	Il21	Unkn	+CsA		19.2508	19.2508
G06	SYBR	Il21	Unkn	+CsA		19.3075	19.3075
G07	SYBR	Il12rb2	Unkn	+CsA		18.7819	18.7819
G08	SYBR	Il12rb2	Unkn	+CsA		18.5315	18.5315
G09	SYBR	Foxp3	Unkn	+CsA		19.8504	19.8504
G10	SYBR	Foxp3	Unkn	+CsA		19.7994	19.7994
G11	SYBR	18s	Unkn	+CsA		9.69869	9.69869
G12	SYBR	18s	Unkn	+CsA		9.45557	9.45557
H01	SYBR	Atf3	Unkn	+CM-4620		22.2168	22.2168
H02	SYBR	Atf3	Unkn	+CM-4620		21.9255	21.9255
H03	SYBR	Tbx21	Unkn	+CM-4620		24.7579	24.7579
H04	SYBR	Tbx21	Unkn	+CM-4620		24.6314	24.6314
H05	SYBR	Il21	Unkn	+CM-4620		19.7083	19.7083
H06	SYBR	Il21	Unkn	+CM-4620		19.8307	19.8307
H07	SYBR	Il12rb2	Unkn	+CM-4620		19.1937	19.1937
H08	SYBR	Il12rb2	Unkn	+CM-4620		19.1473	19.1473
H09	SYBR	Foxp3	Unkn	+CM-4620		20.0505	20.0505
H10	SYBR	Foxp3	Unkn	+CM-4620		20.1826	20.1826
H11	SYBR	18s	Unkn	+CM-4620		10.0492	10.0492
H12	SYBR	18s	Unkn	+CM-4620		10.2893	10.2893

## Sheet: Fig S4A
Rest	Restim	Restim+CsA	Restim+CM-4602	Restim+BTP2
103.175	48.8924	84.2454	96.2804	97.2833
99.4145	48.767	75.2191	92.2687	92.2687
97.4087	47.0119	75.2191	91.6419	90.1375

## Sheet: Fig S4B
rest	rest +iono	rest +iono+CsA
96.6052	8.26382	53.7342
103.395	14.8206	67.5073

## Sheet: Fig S4C
Rest	Restim	Restim+CsA	Restim+BAY 11-7082	Restim+SP600125	Restim+T5224
90.9	14.4	66.7	8.7	15.9	26.7
90.5	13.7	68.6	6.97	16.9	14.6
91	12.7	67.8	6.99	14.8	17.3
