# Supplementary material for: Sustained store-operated calcium entry utilizing activated chromatin state leads to instability in iTregs
Source: eLife. 2023 Dec 6;12:RP88874. doi: 10.7554/eLife.88874 (PMC10699804; doi:10.7554/eLife.88874)
Supplement: Figure 5—source data 1. [file elife-88874-fig5-data1.xlsx]

## Sheet: Fig 5H
nTreg Rest	nTreg Act	iTreg Rest	iTreg Restim	iTreg Restim+CsA	iTreg Restim+CM-4620
0	0	0	35.44	0	0
0	0	0	30.565	0	0
0	0	0	31.955	0	0
