# Supplementary material for: Sustained store-operated calcium entry utilizing activated chromatin state leads to instability in iTregs
Source: eLife. 2023 Dec 6;12:RP88874. doi: 10.7554/eLife.88874 (PMC10699804; doi:10.7554/eLife.88874)
Supplement: Figure 6—source data 1. [file elife-88874-fig6-data1.xlsx]

## Sheet: Fig 6B
0.25+0.5			0.125+0.25
WT-ORAI	DN-ORAI		WT-ORAI	DN-ORAI
52.9572	77.4943		84.8954	93.4852
52.4113	74.4875		82.1656	92.8018
50.6369	73.5308		79.5723	89.795

## Sheet: Fig 6C
-iTreg	+WT-ORAI iTreg	+DN-ORAI iTreg
53.1	53.2	29
60.4	53.8	35.8
62.7	54.8	41.1

## Sheet: Fig 6D
WT	DN	WT-40	DN-40	WT-100	DN-100
76.2	64	32.4	66.3	31.8	36.9
78	58.6	29.7	63.2	30	43.7
69.2	77.8	34.6	42.9	28.8	44.1
	51.7	29.6		30.4	44.1
				24.6	38.3
